# Supplementary material for: The Pharmacogenetic Footprint of ACE Inhibition: A Population-Based Metabolomics Study
Source: PubMed Central journal article supplement (PMC4847917; doi:10.1371/journal.pone.0153163), 2016-04-27

## **The pharmacogenetic footprint of ACE inhibition: a population based metabolomics study**

Authors:

Elisabeth Altmaier, Cristina Menni, Margit Heier, Christa Meisinger, Barbara Thorand, Jan Quell,  
Michael Kobl, Werner Römisch-Margl, Ana M Valdes, Massimo Mangino, Melanie Waldenberger,  
Konstantin Strauch, Thomas Illig, Jerzy Adamski, Tim D. Spector, Christian Gieger, Karsten  
Suhre, Gabi Kastenmüller

Journal: PLOS One

Corresponding author:

Gabi Kastenmüller

Helmholtz Zentrum München, German Research Center for Environmental Health,

Ingolstädter Landstr. 1,

D-85764 Neuherberg, Germany

e-mail: [g.kastenmueller@helmholtz-muenchen.de](mailto:g.kastenmueller@helmholtz-muenchen.de)

**aspartylphenylalanine – rs4316**

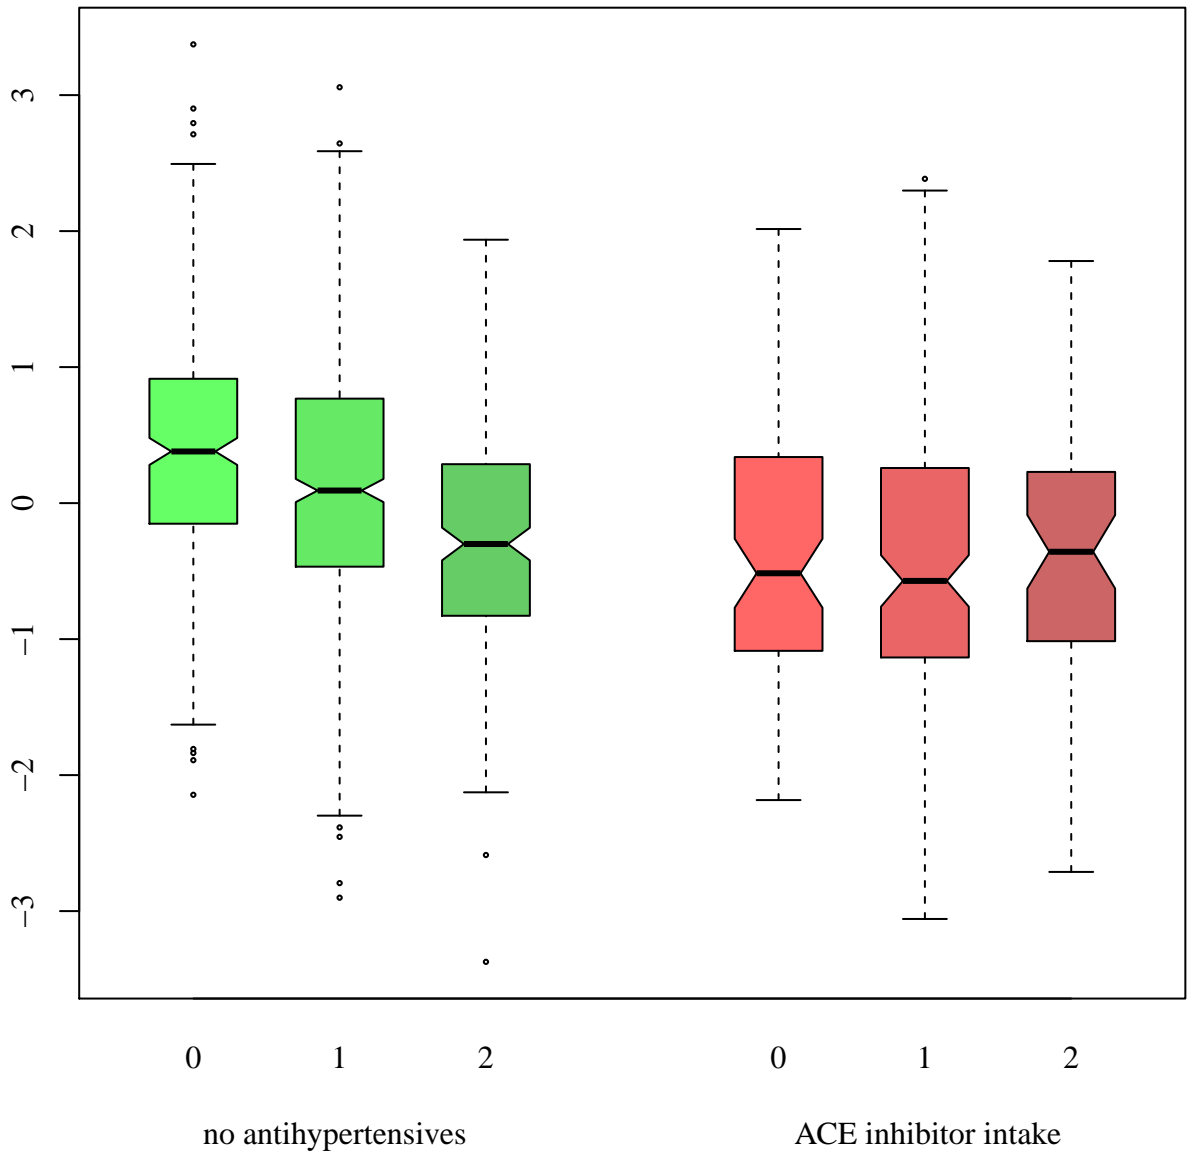

**aspartylphenylalanine/HWESASXX – rs4316**

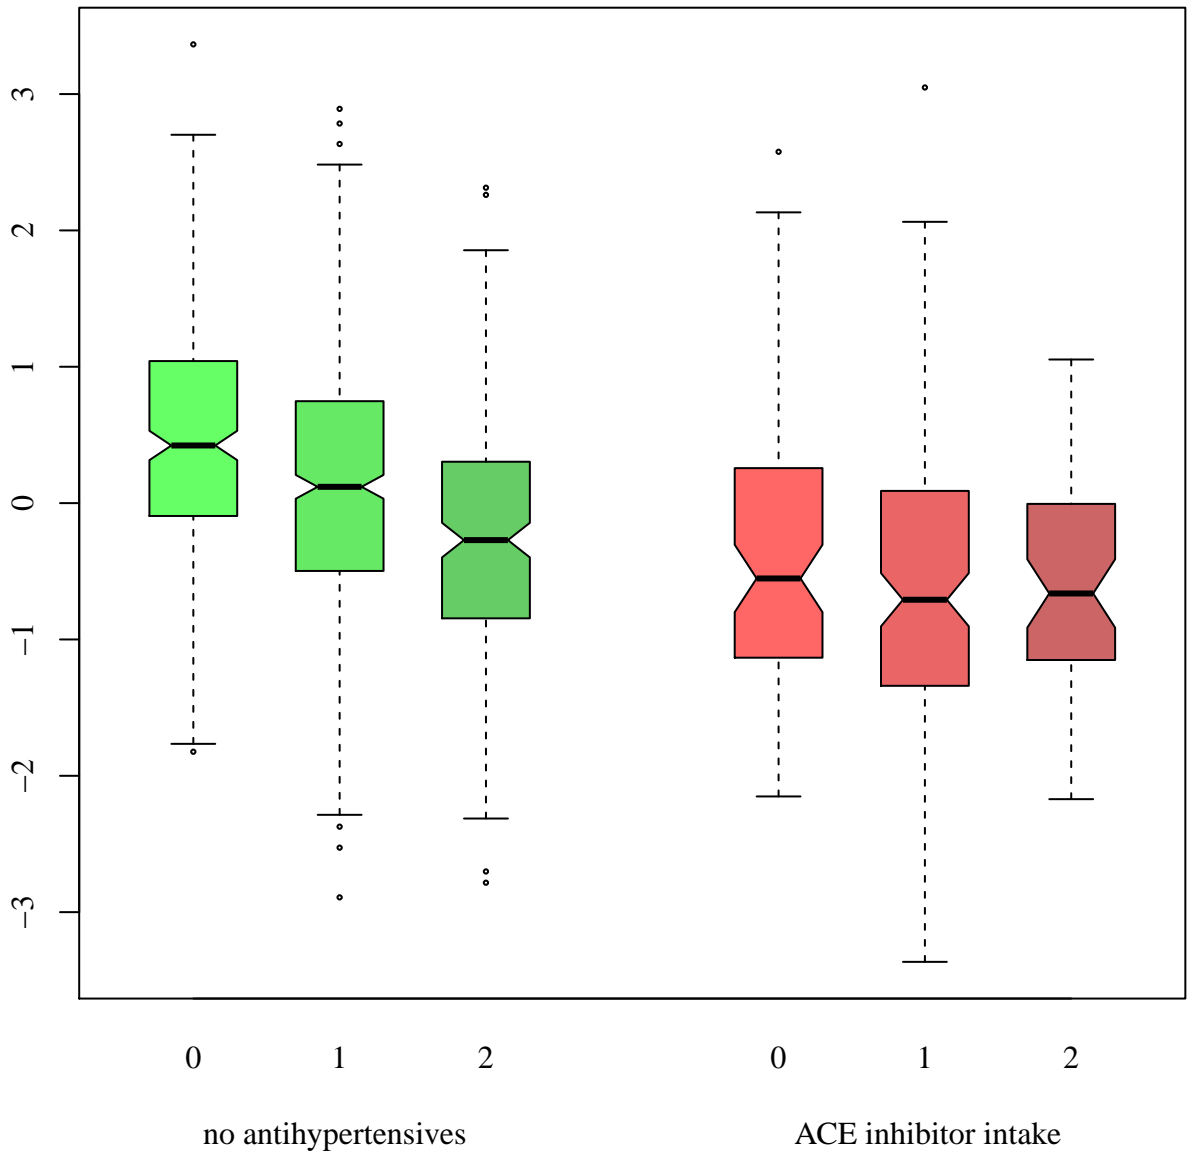

**aspartylphenylalanine/X11805 – rs4316**

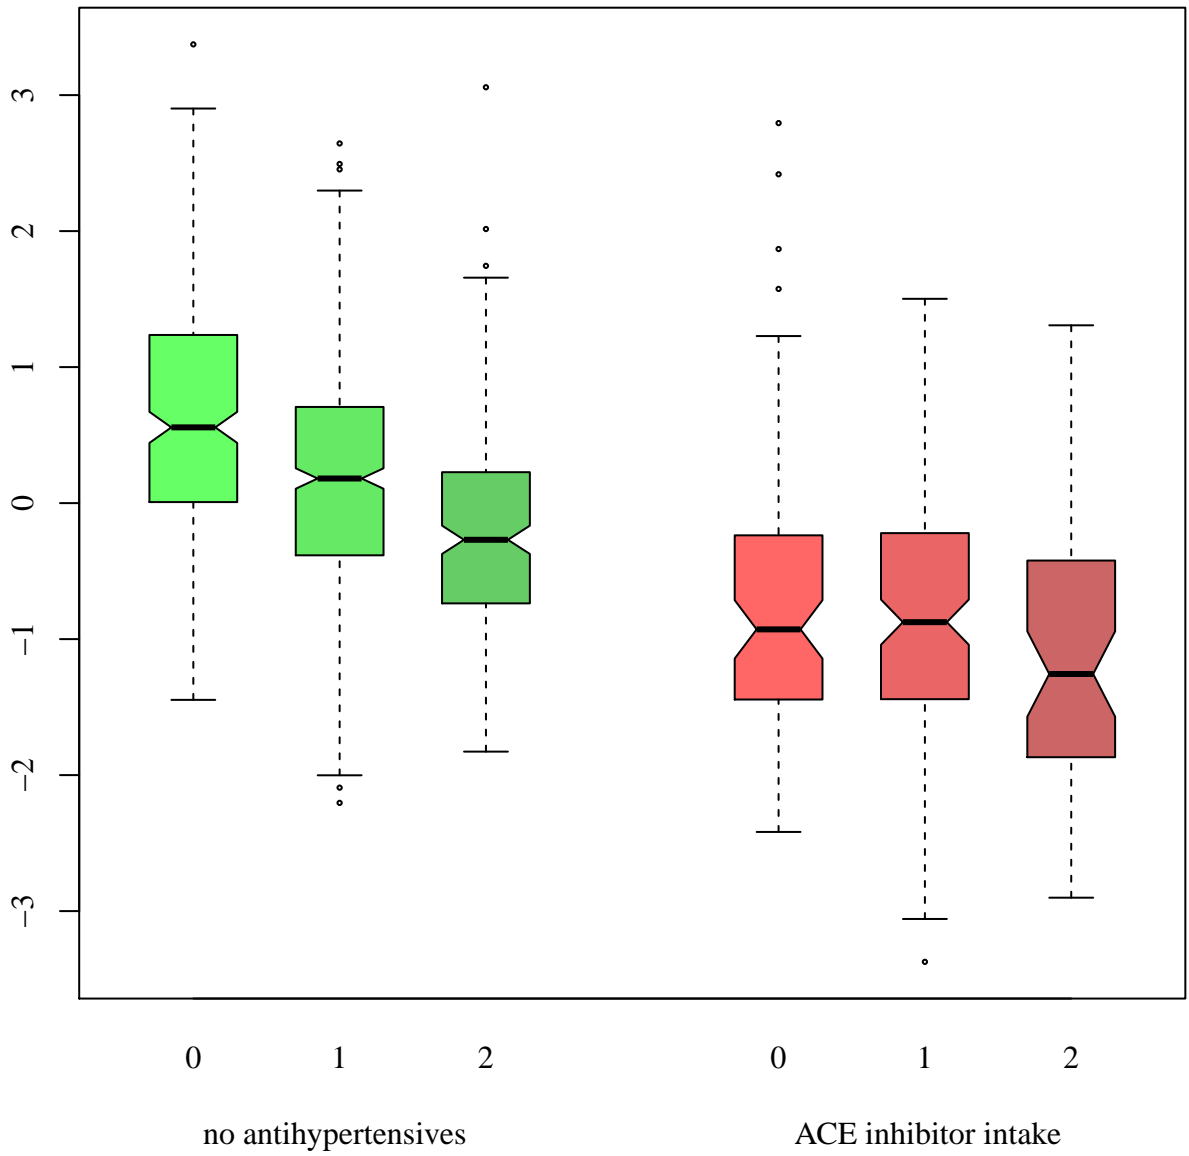

**aspartylphenylalanine/X14450 – rs4316**

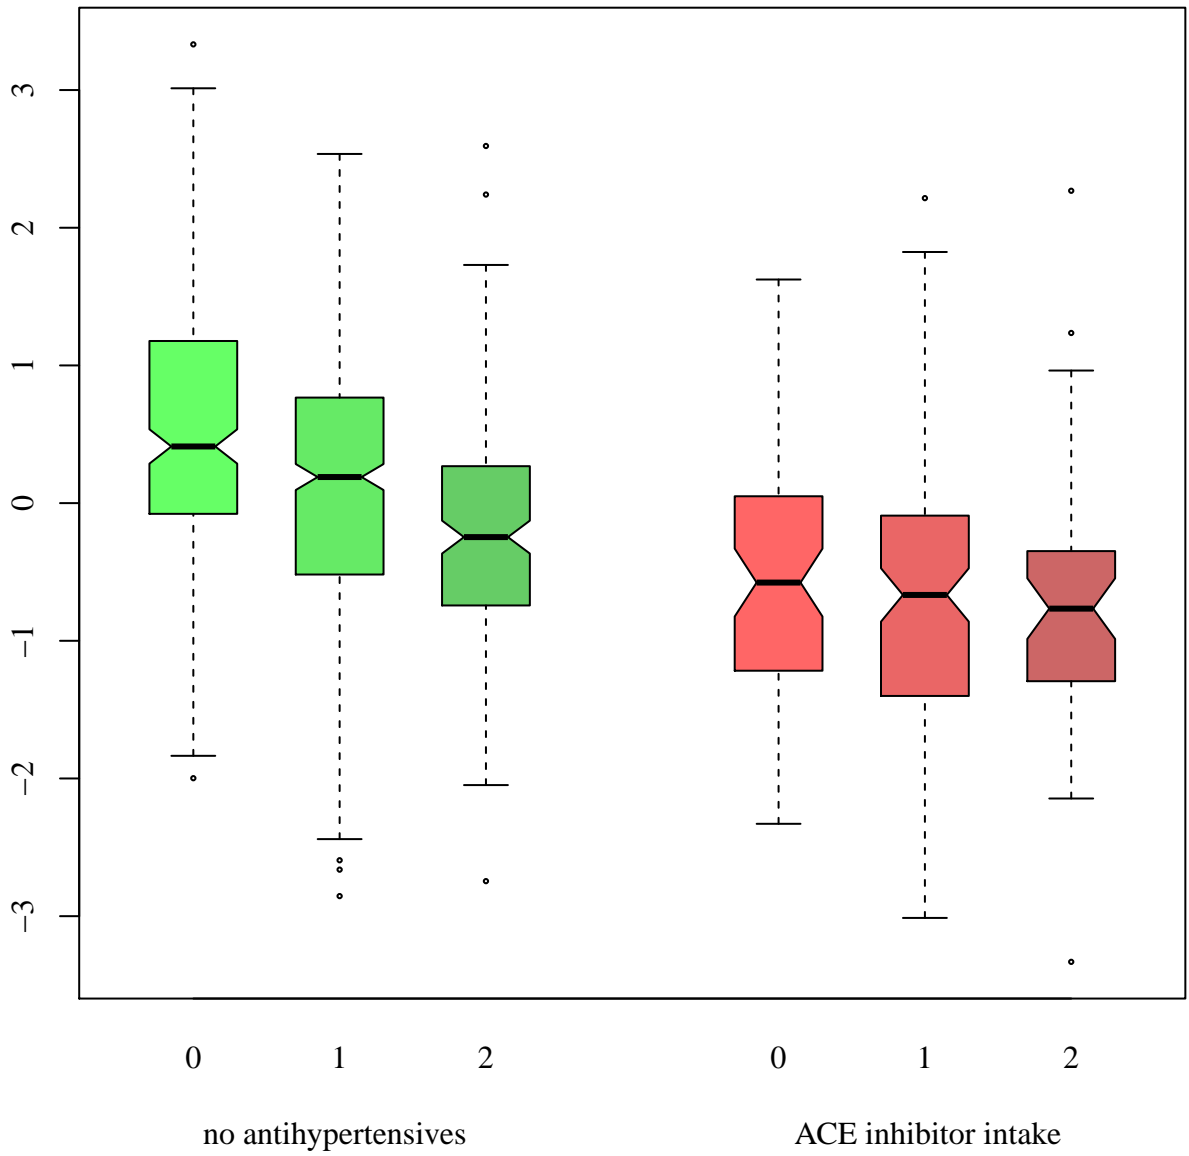

**X14086 – rs4316**

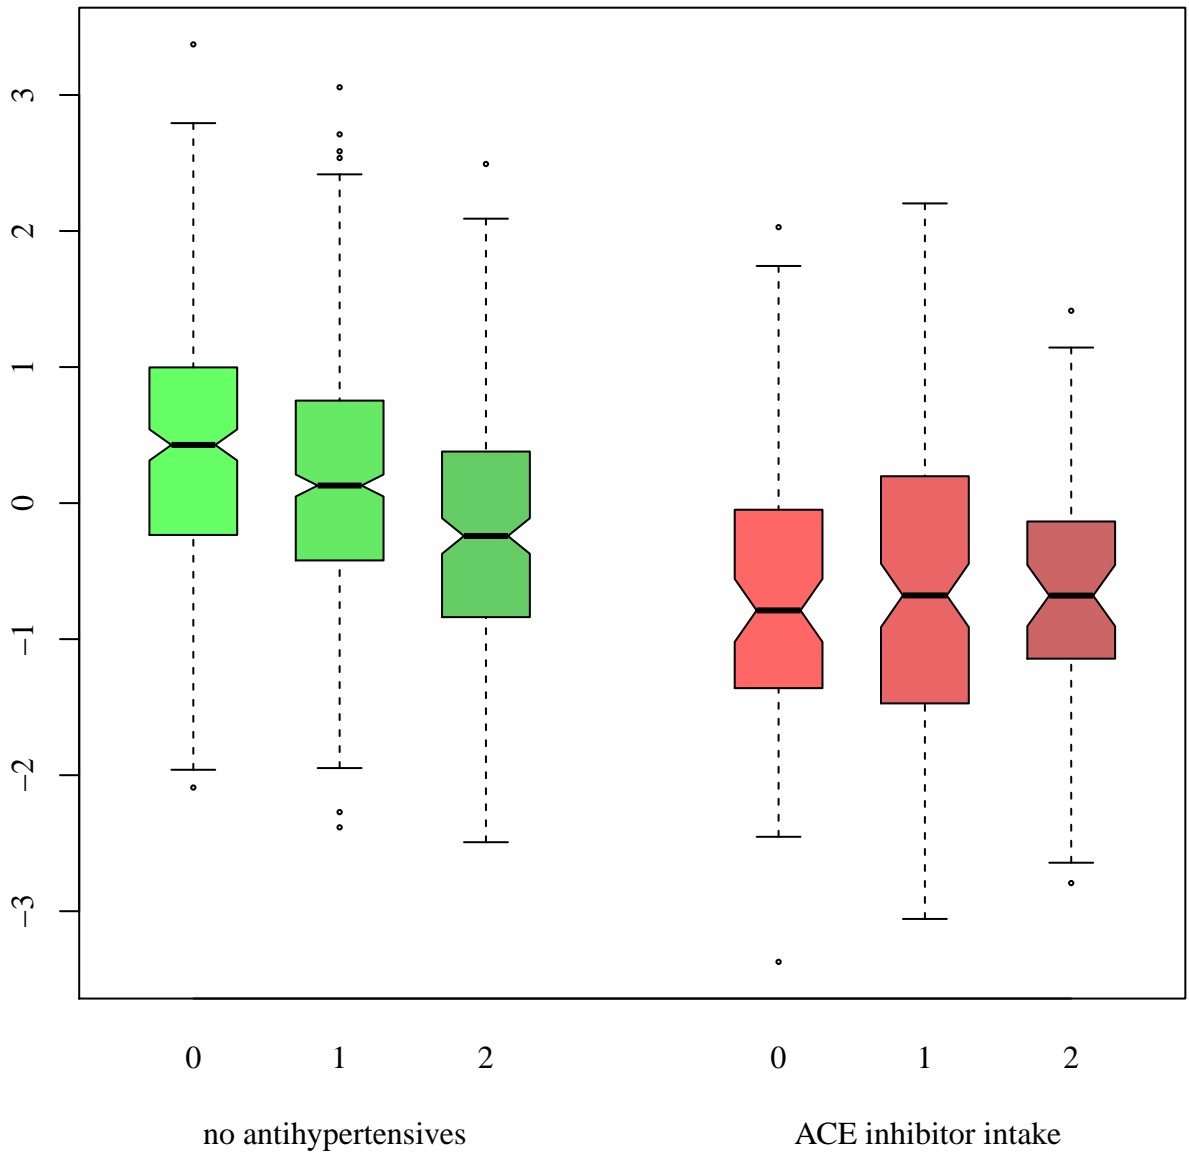

**X14189 – rs4316**

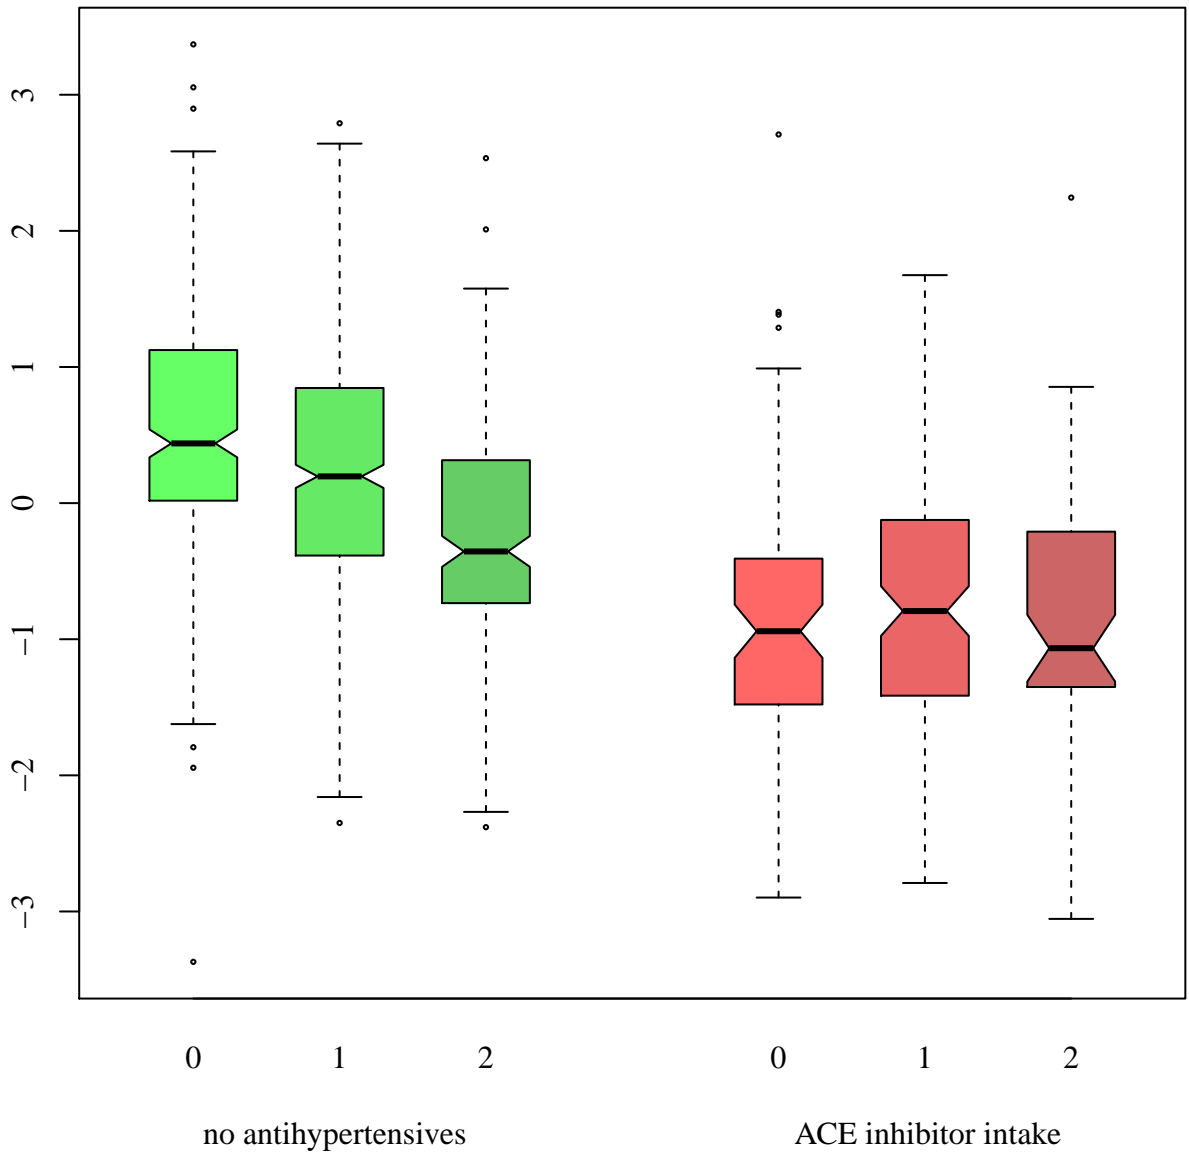

**X14205 – rs4316**

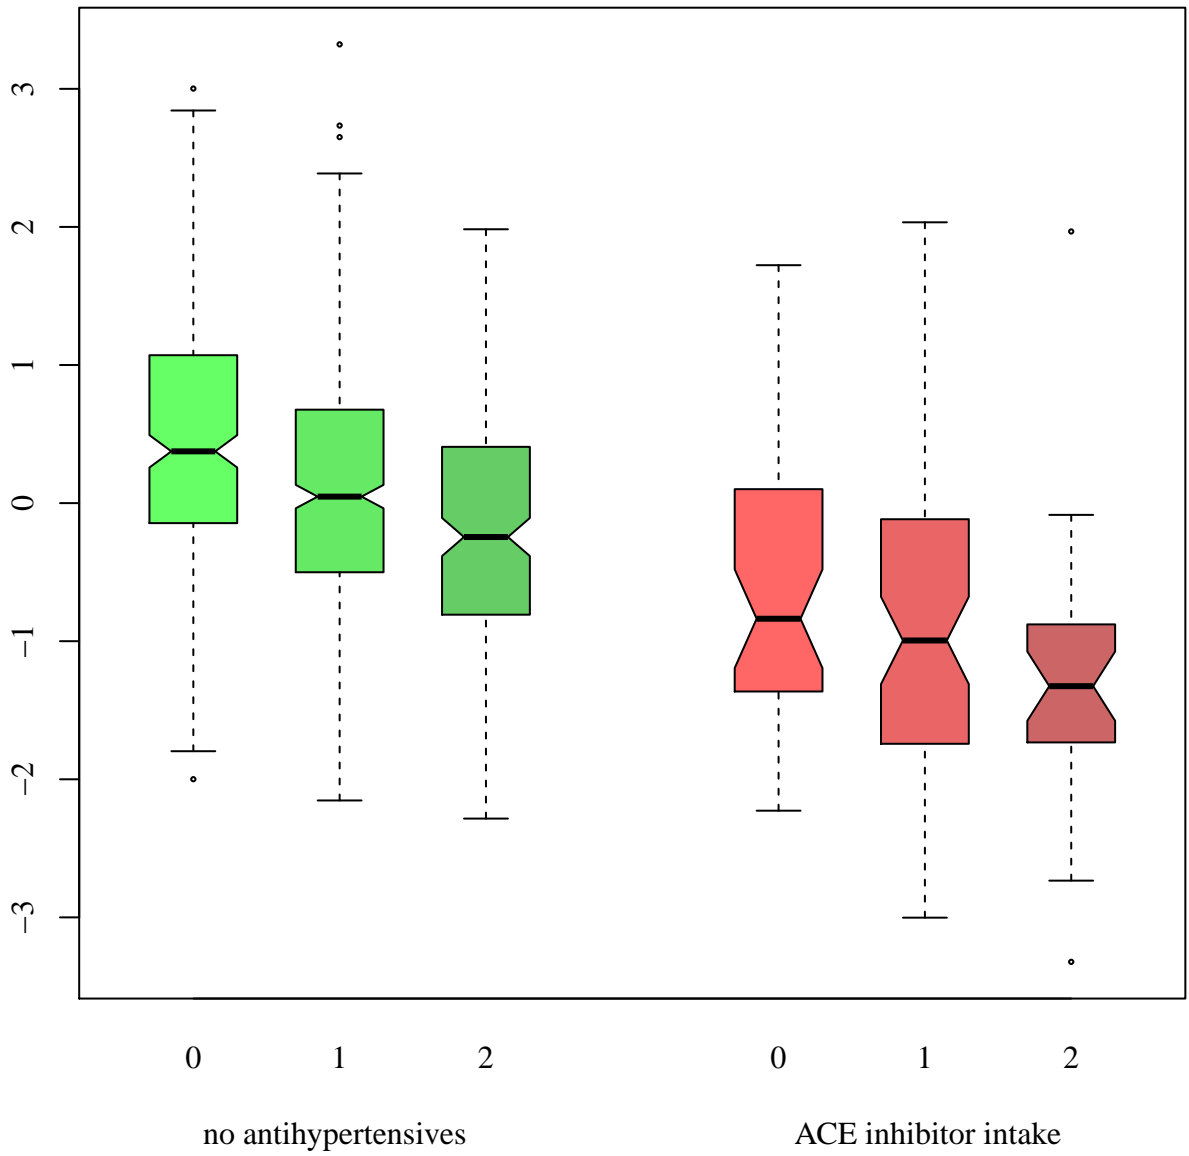



**X14208 – rs4316**

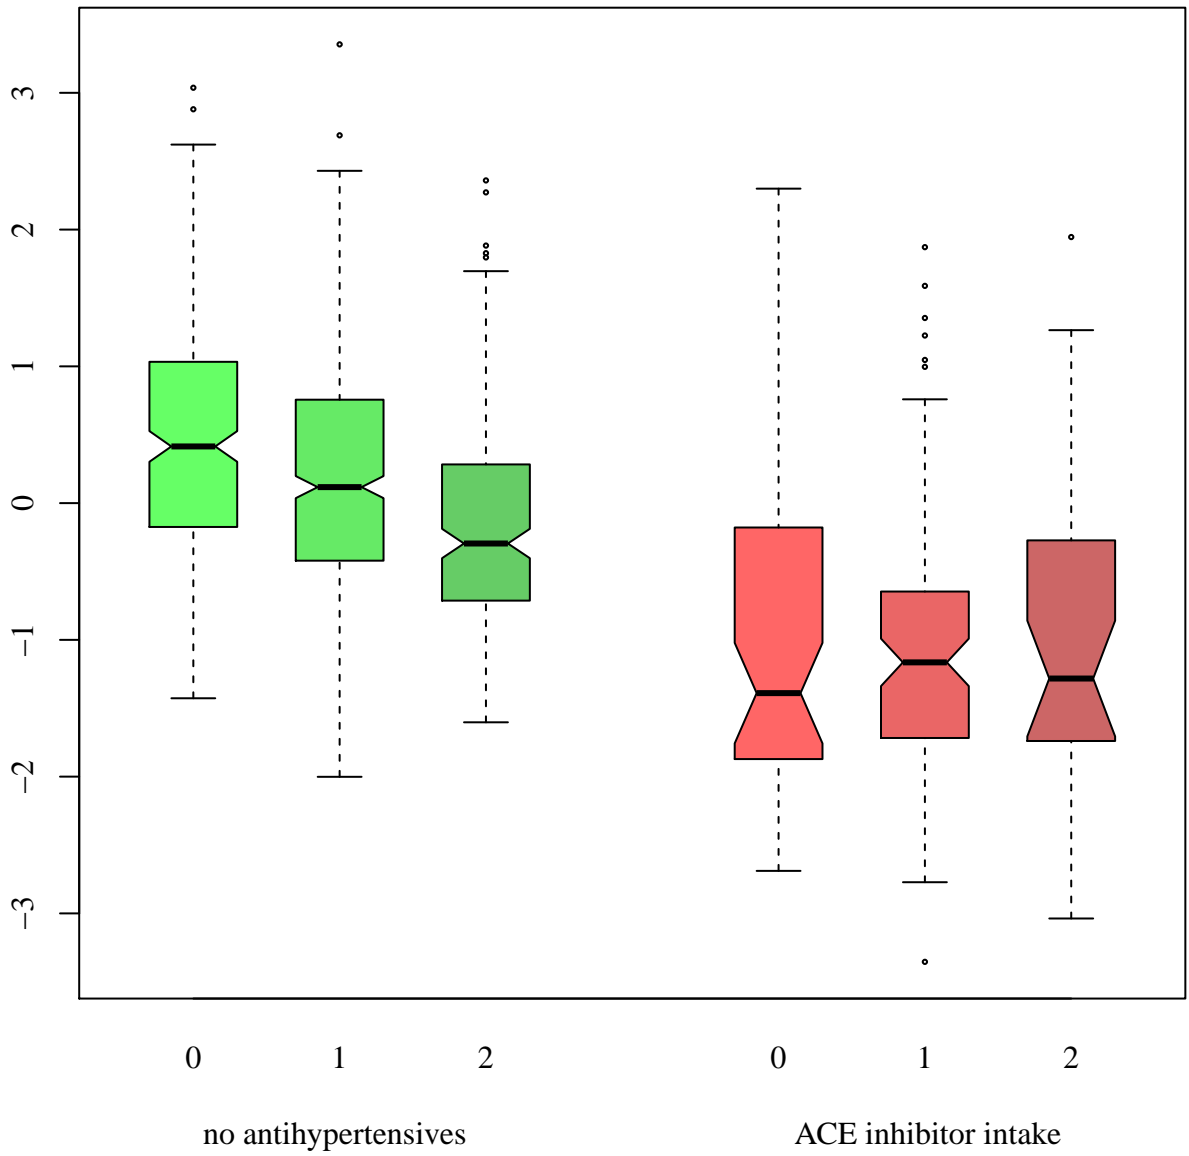

**X14304 – rs4316**

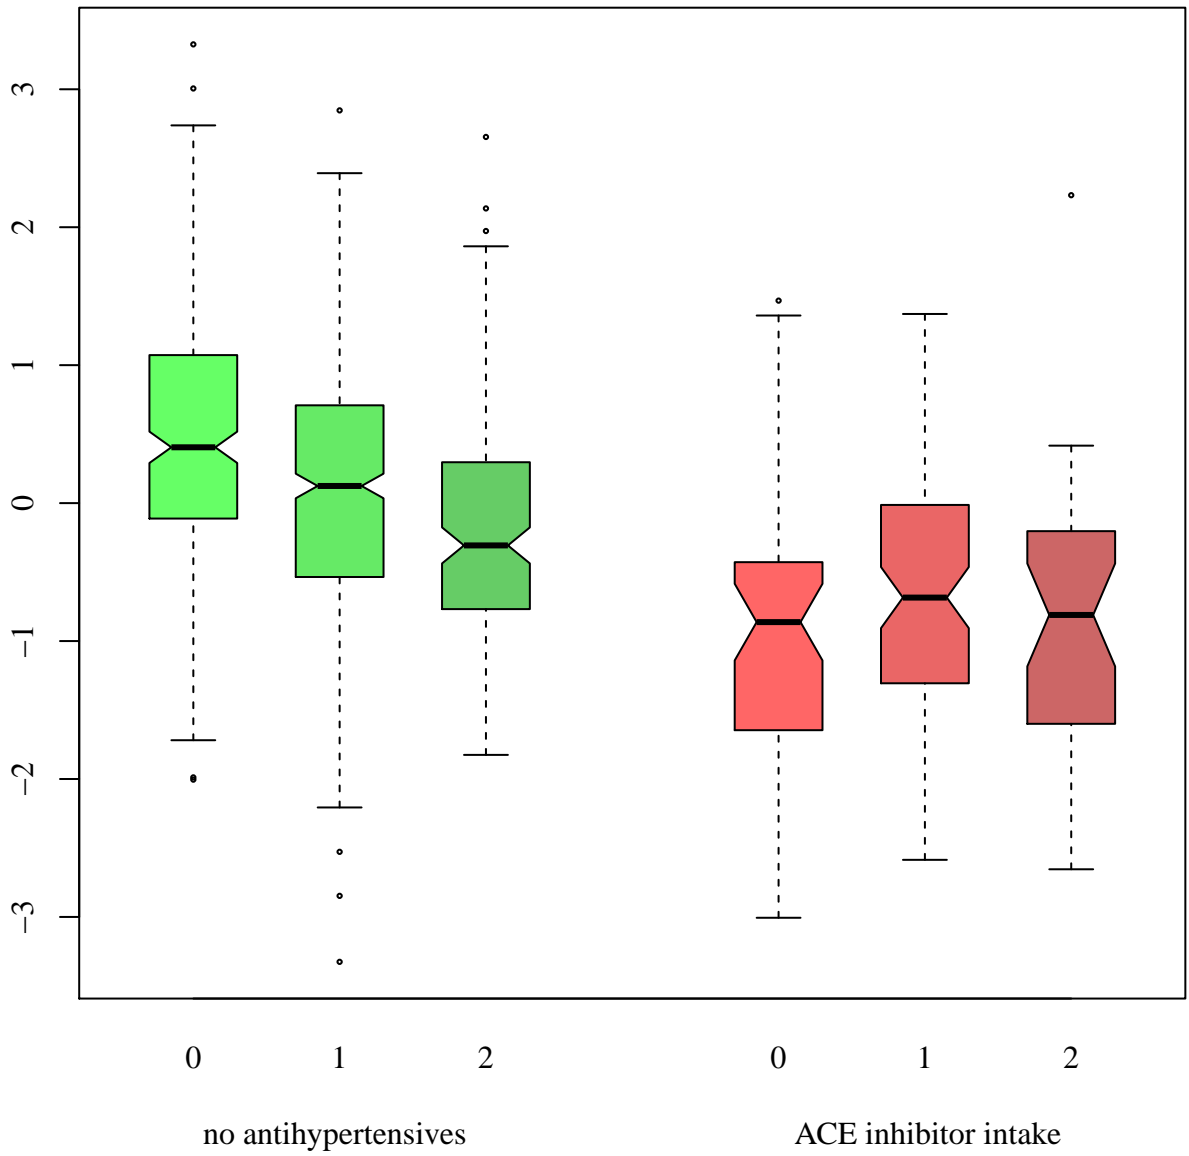

**aspartylphenylalanine – rs4320**

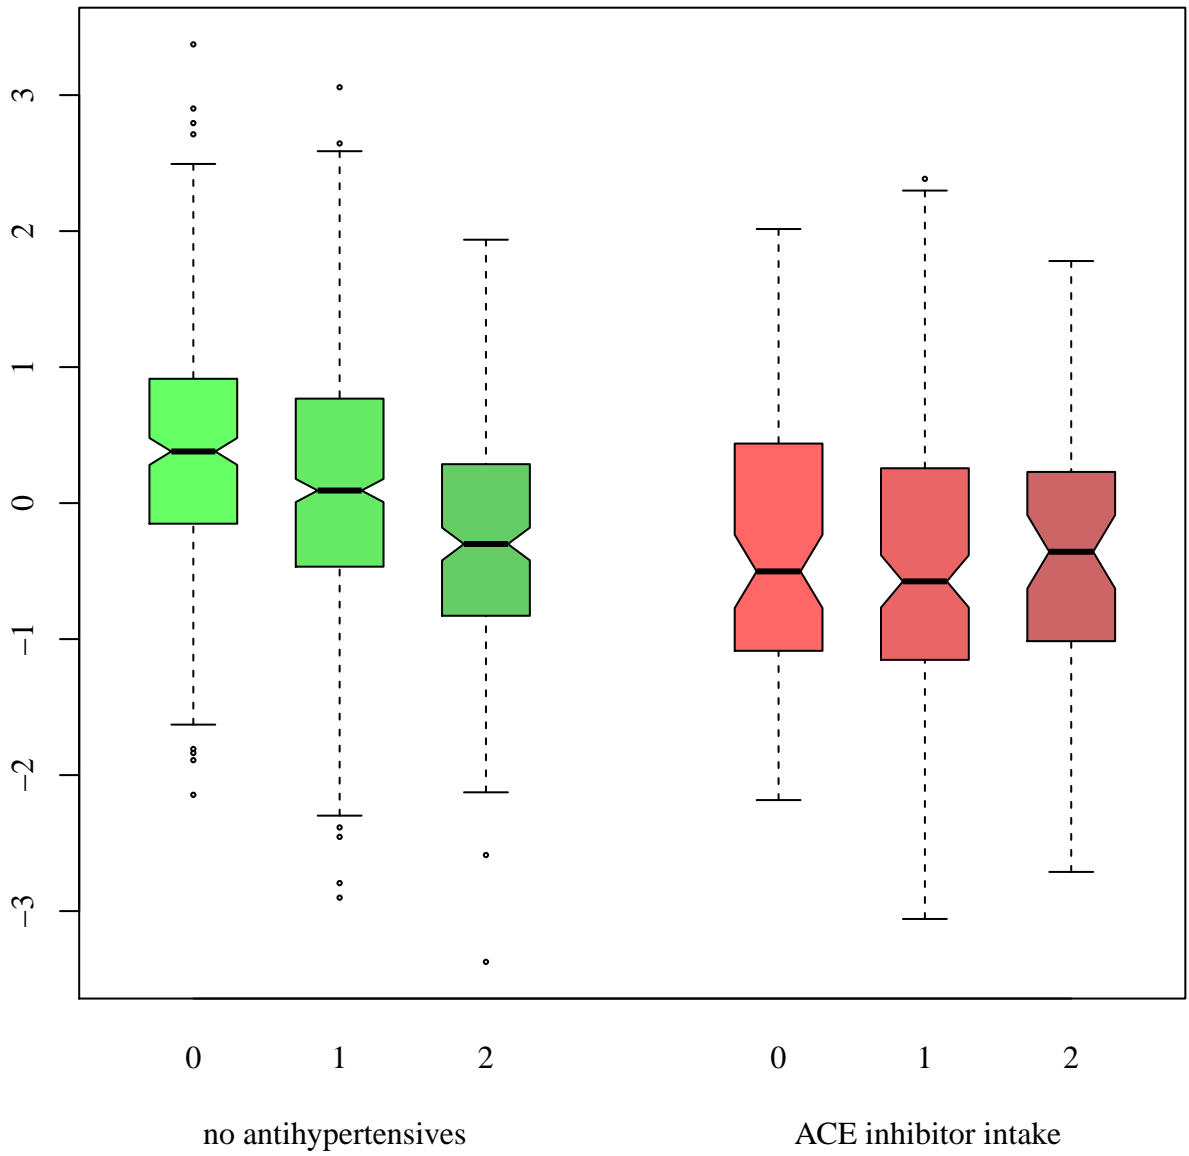

**aspartylphenylalanine/HWESASXX – rs4320**

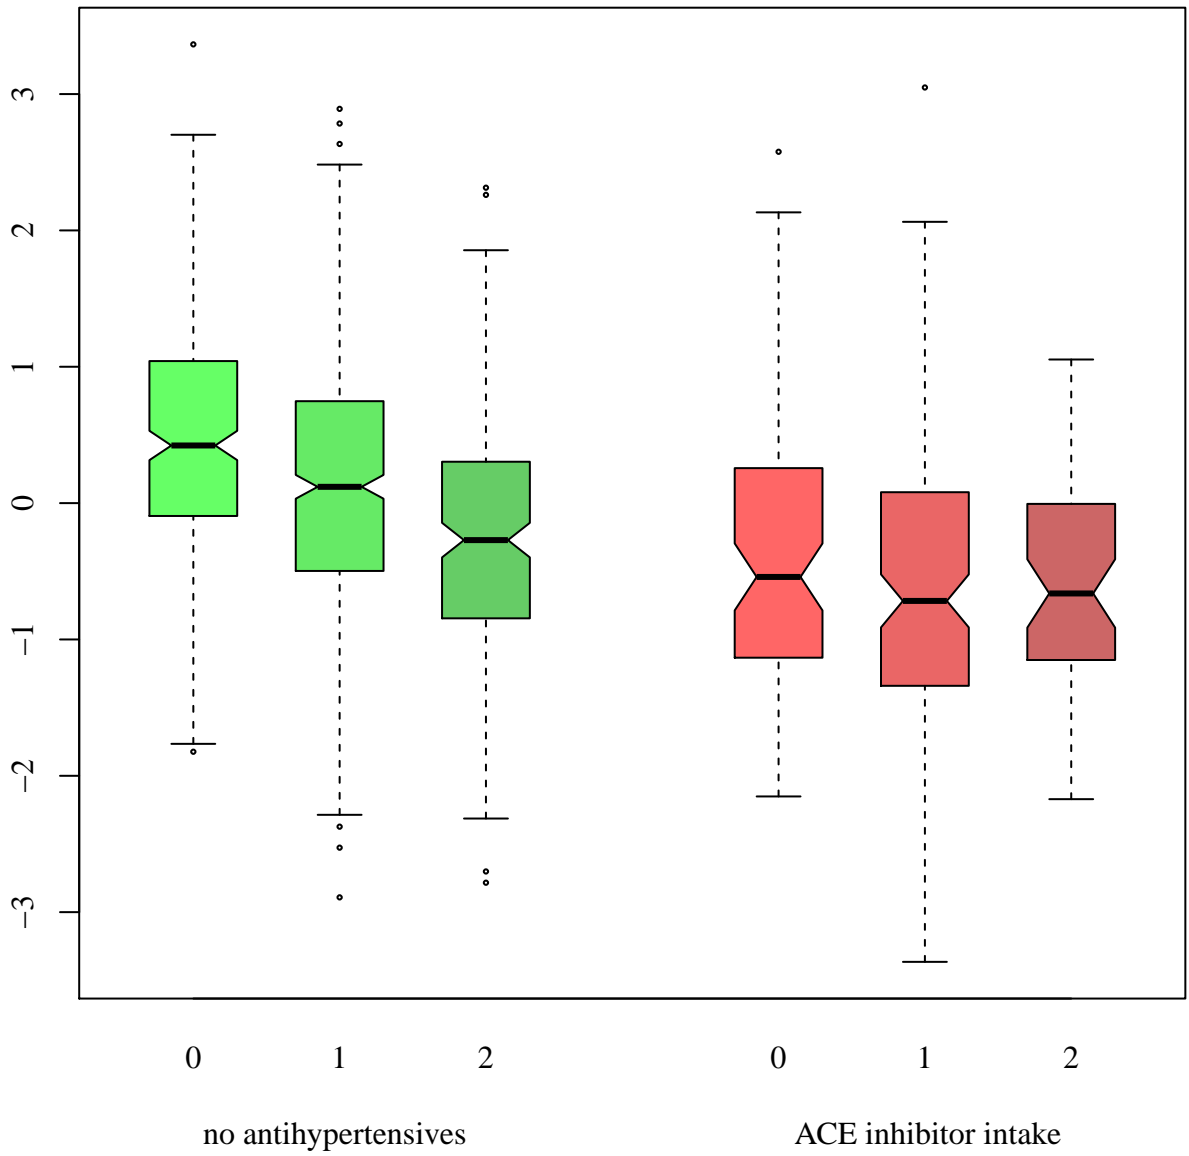

**aspartylphenylalanine/X11805 – rs4320**

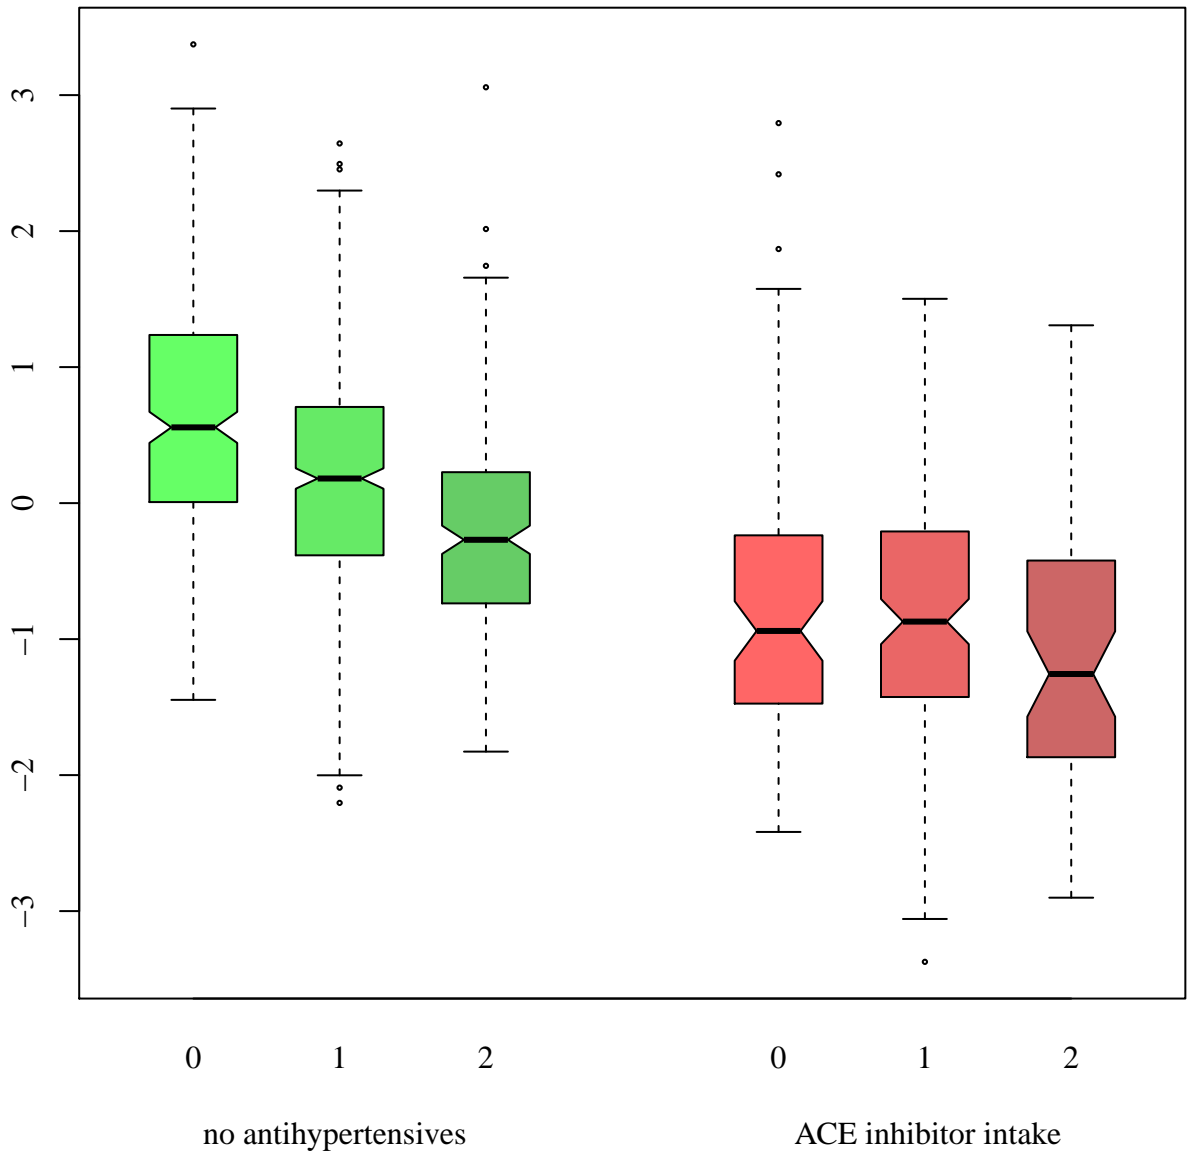

aspartylphenylalanine/X14450 – rs4320

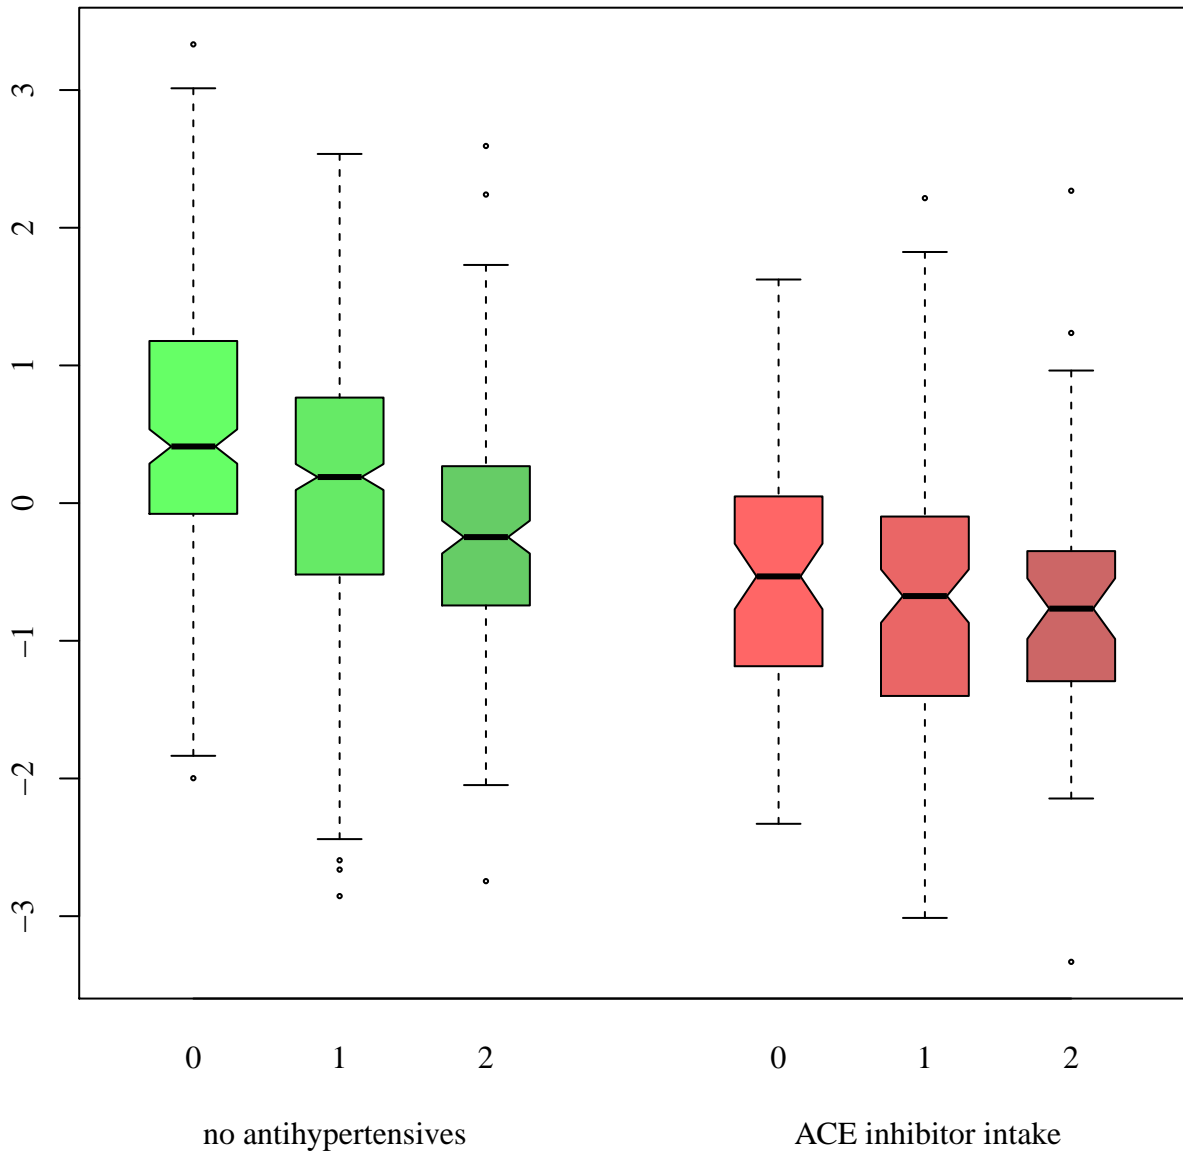

**X14086 – rs4320**

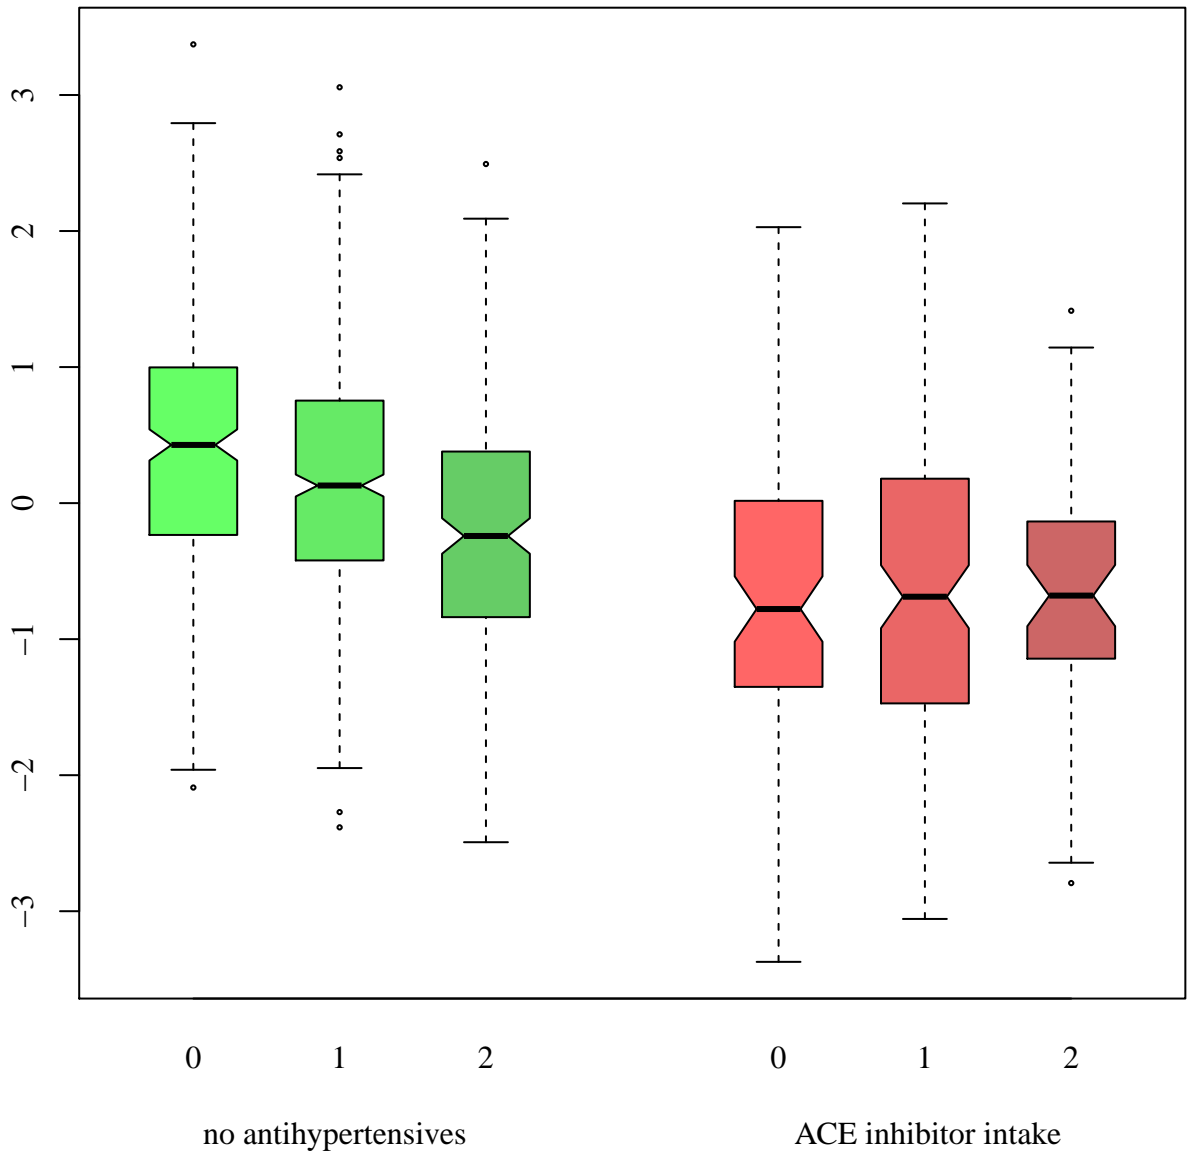

**X14189 – rs4320**

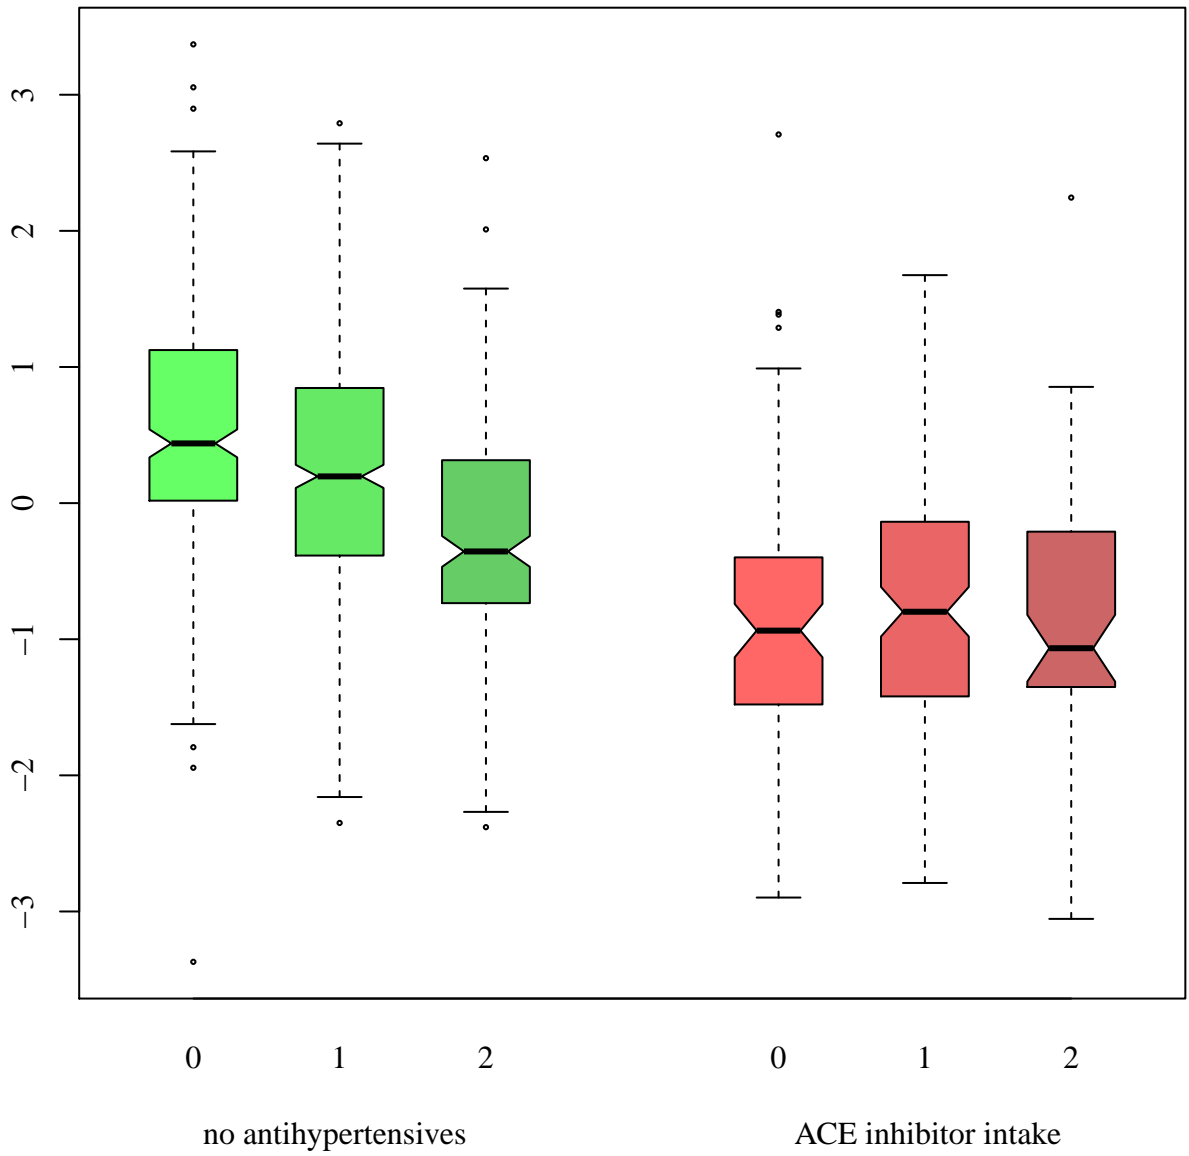



**X14205 – rs4320**



**X14208 – rs4320**

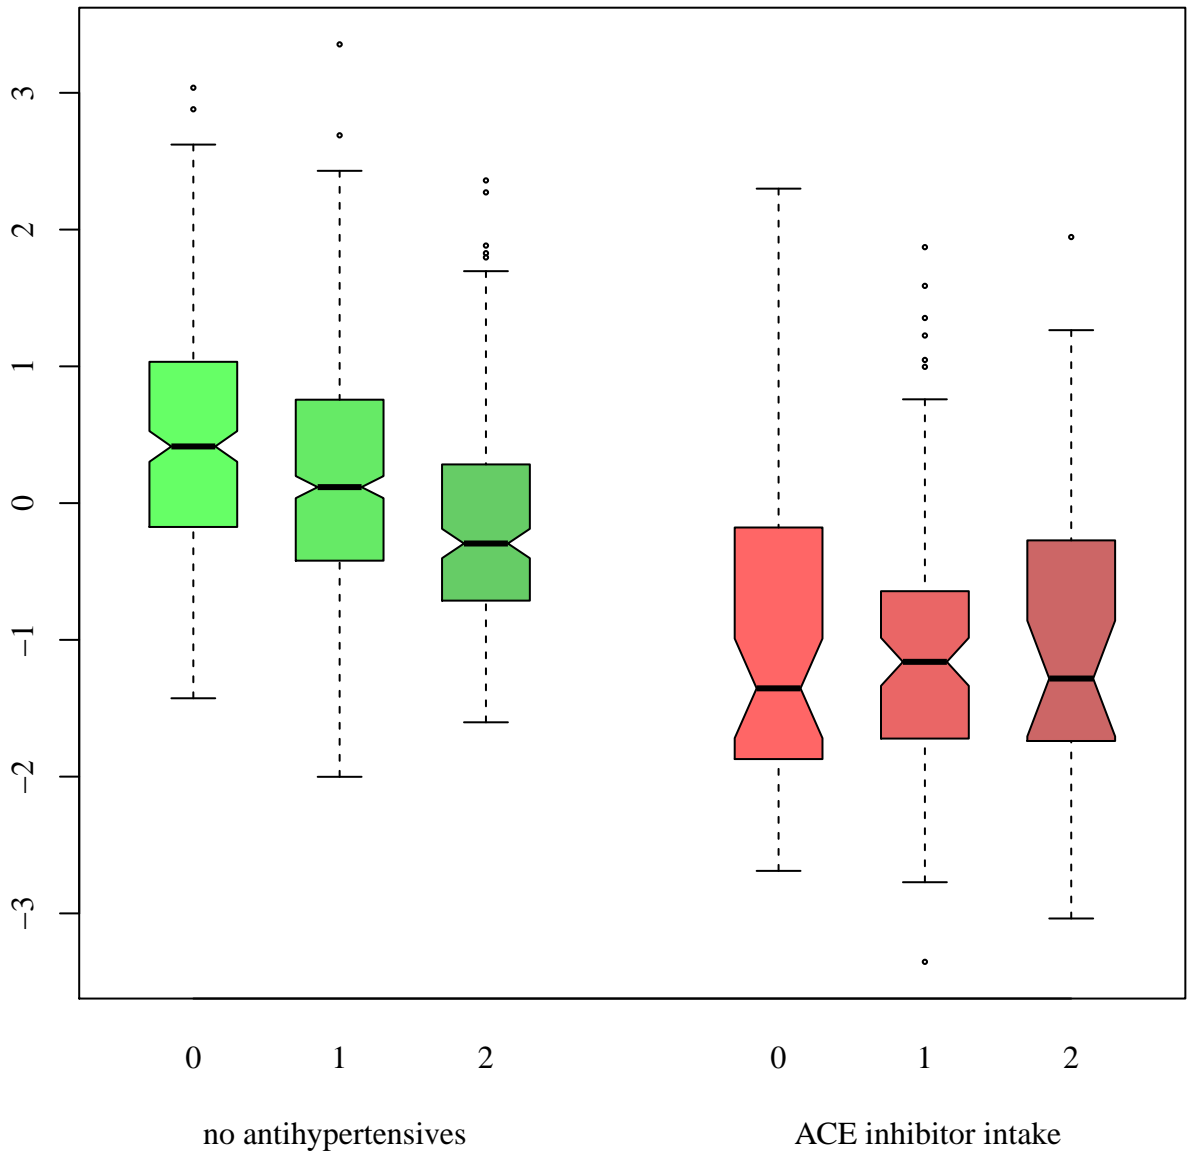

**X14304 – rs4320**

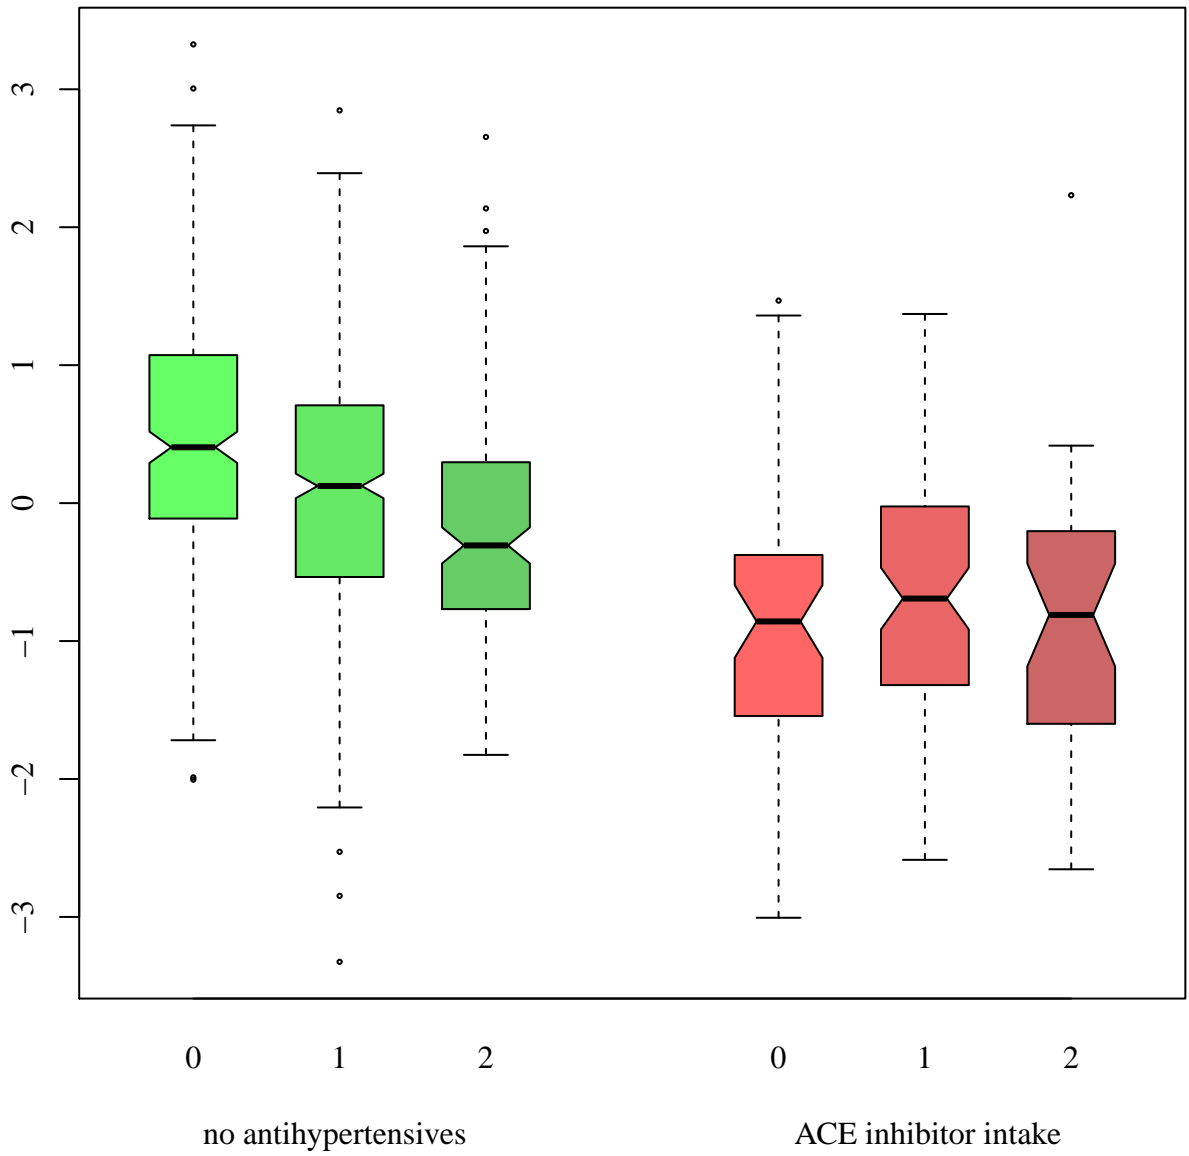

**aspartylphenylalanine – rs4323**

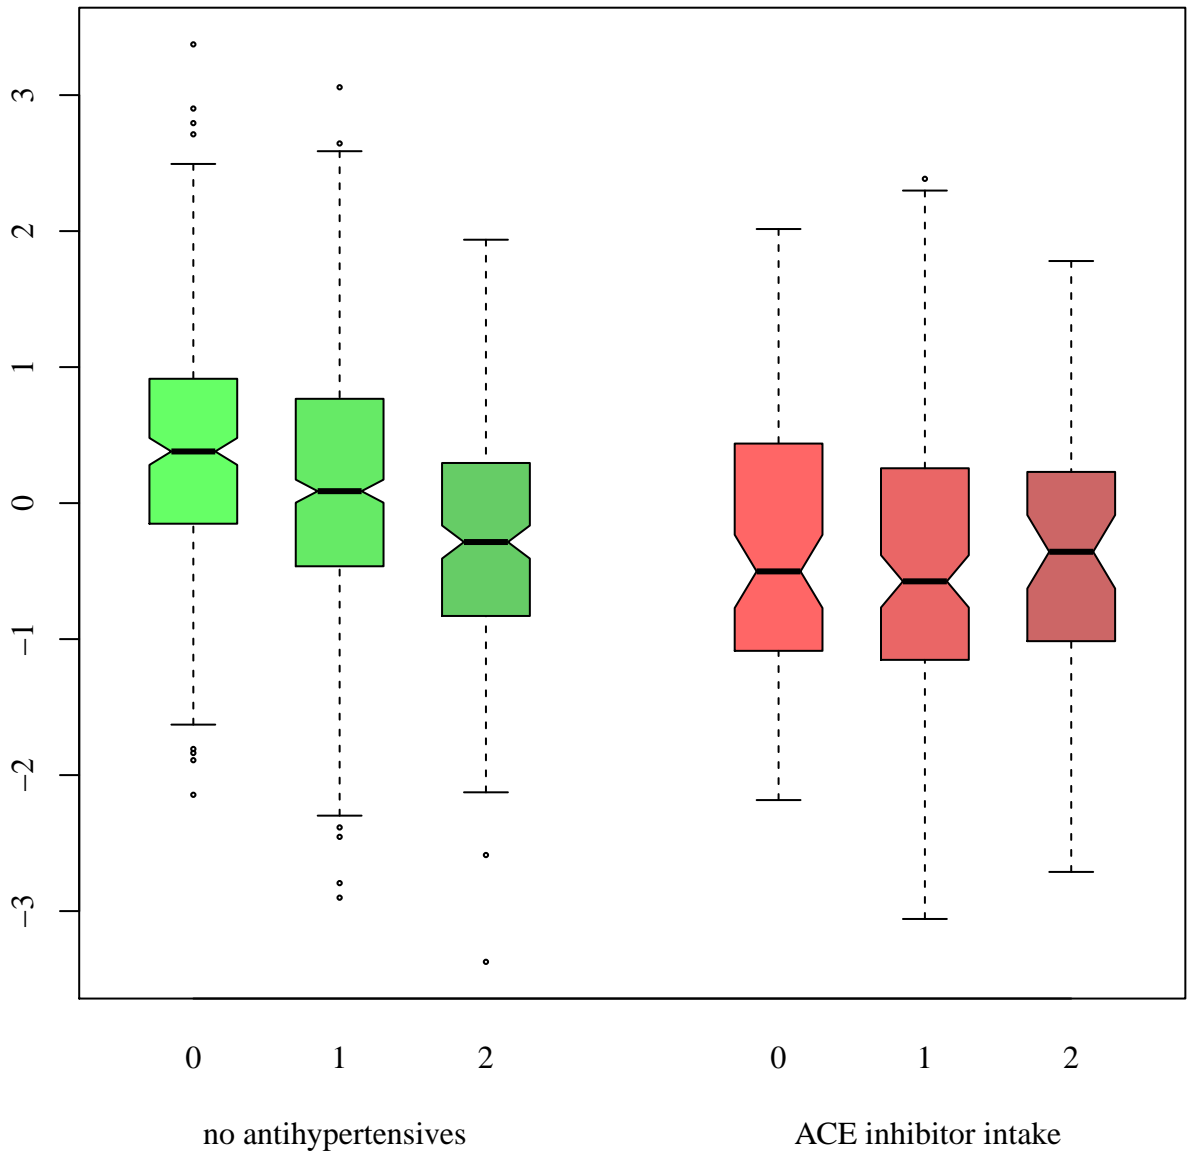

**aspartylphenylalanine/HWESASXX – rs4323**

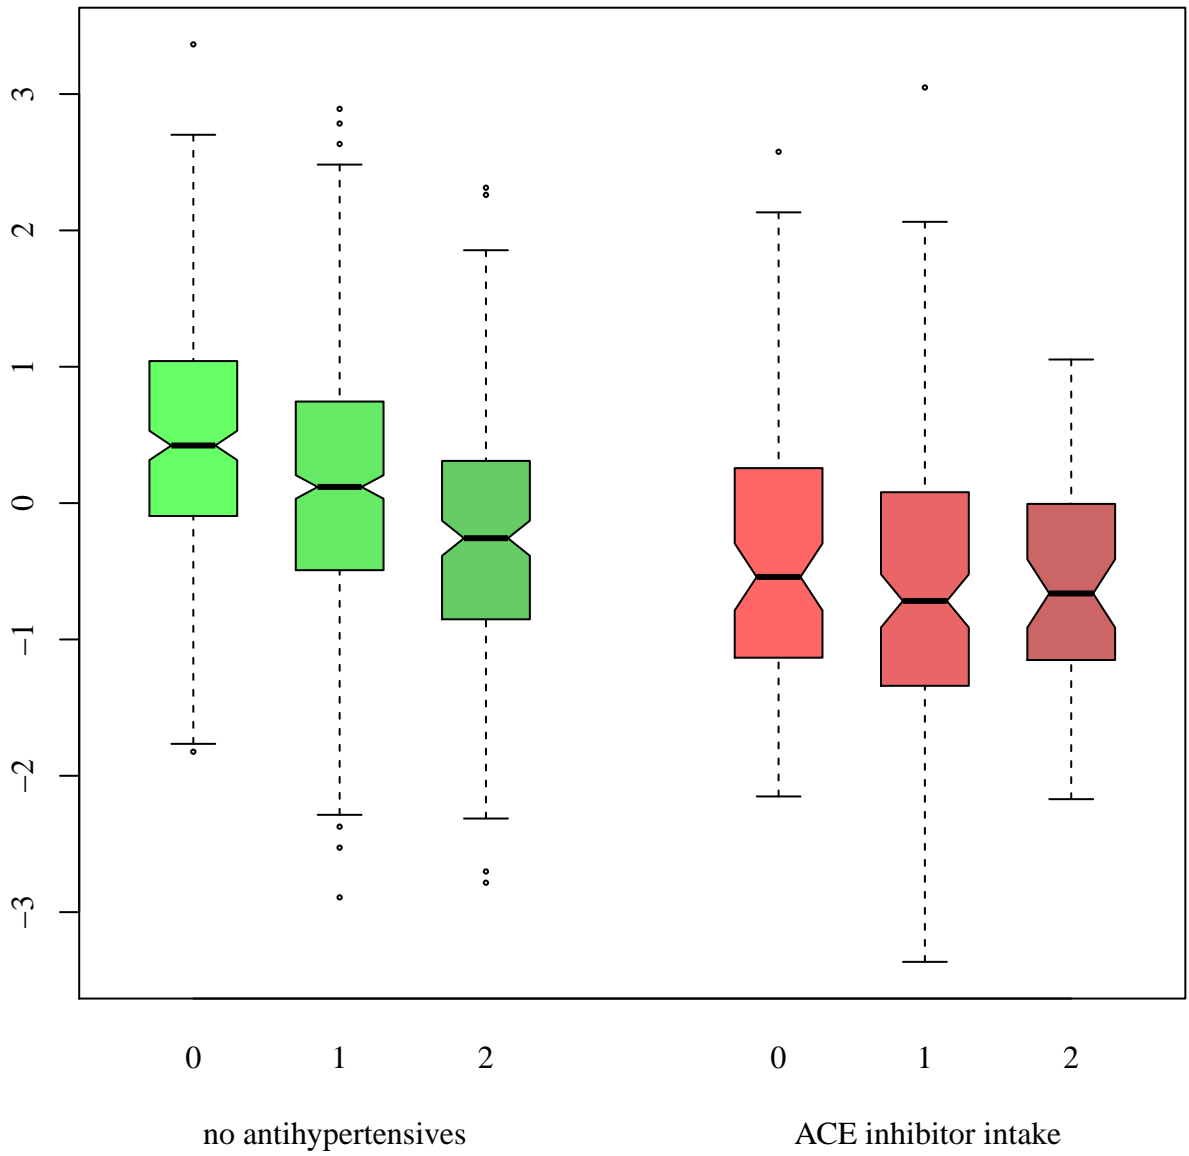

**aspartylphenylalanine/X11805 – rs4323**

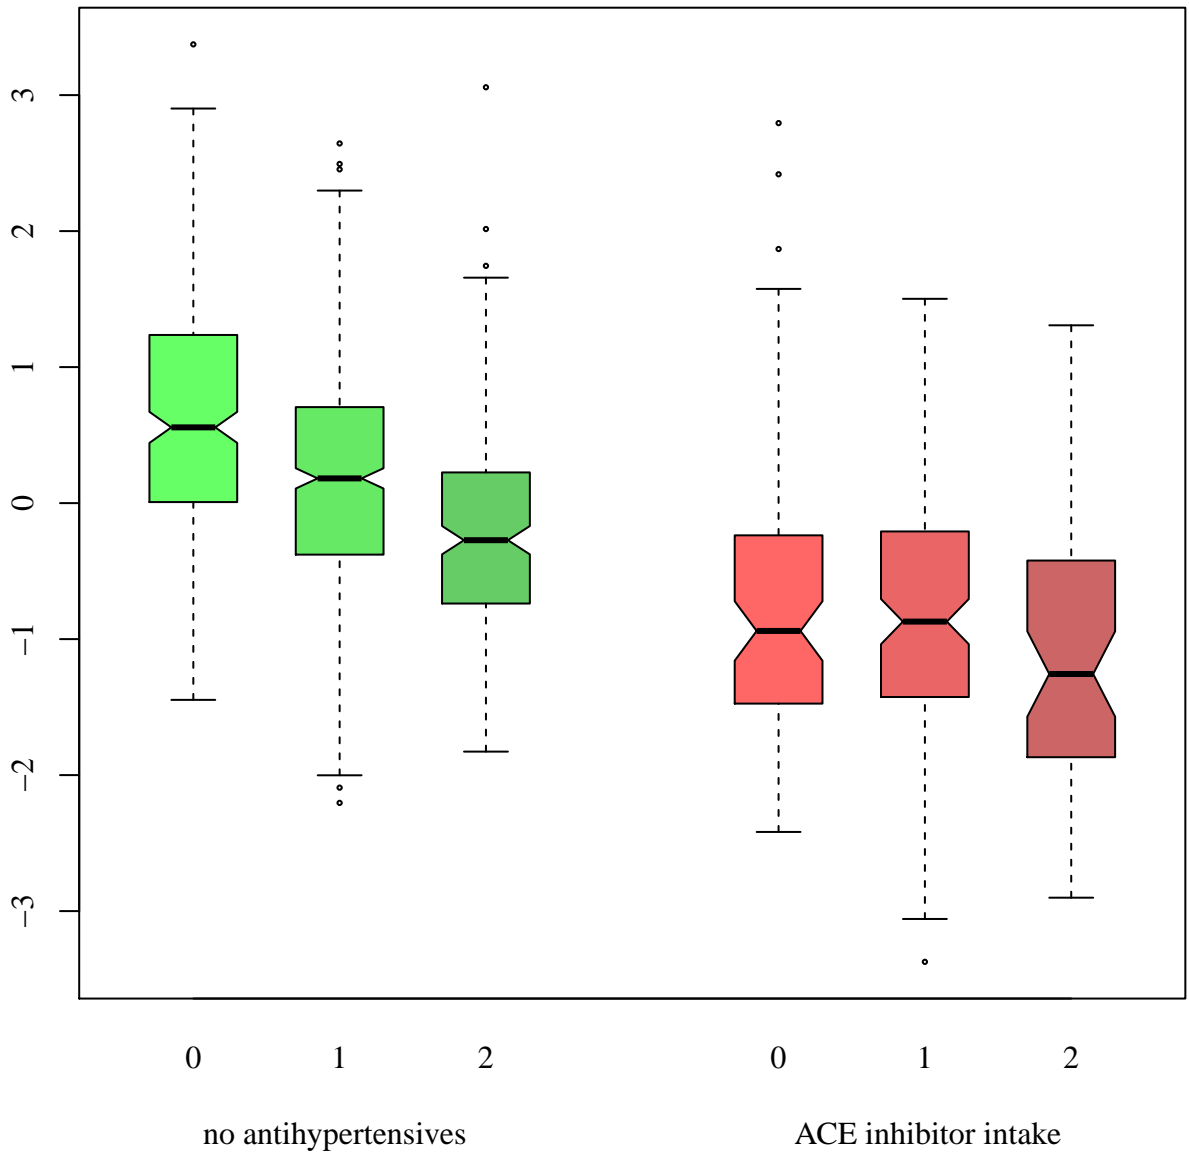

**aspartylphenylalanine/X14450 – rs4323**

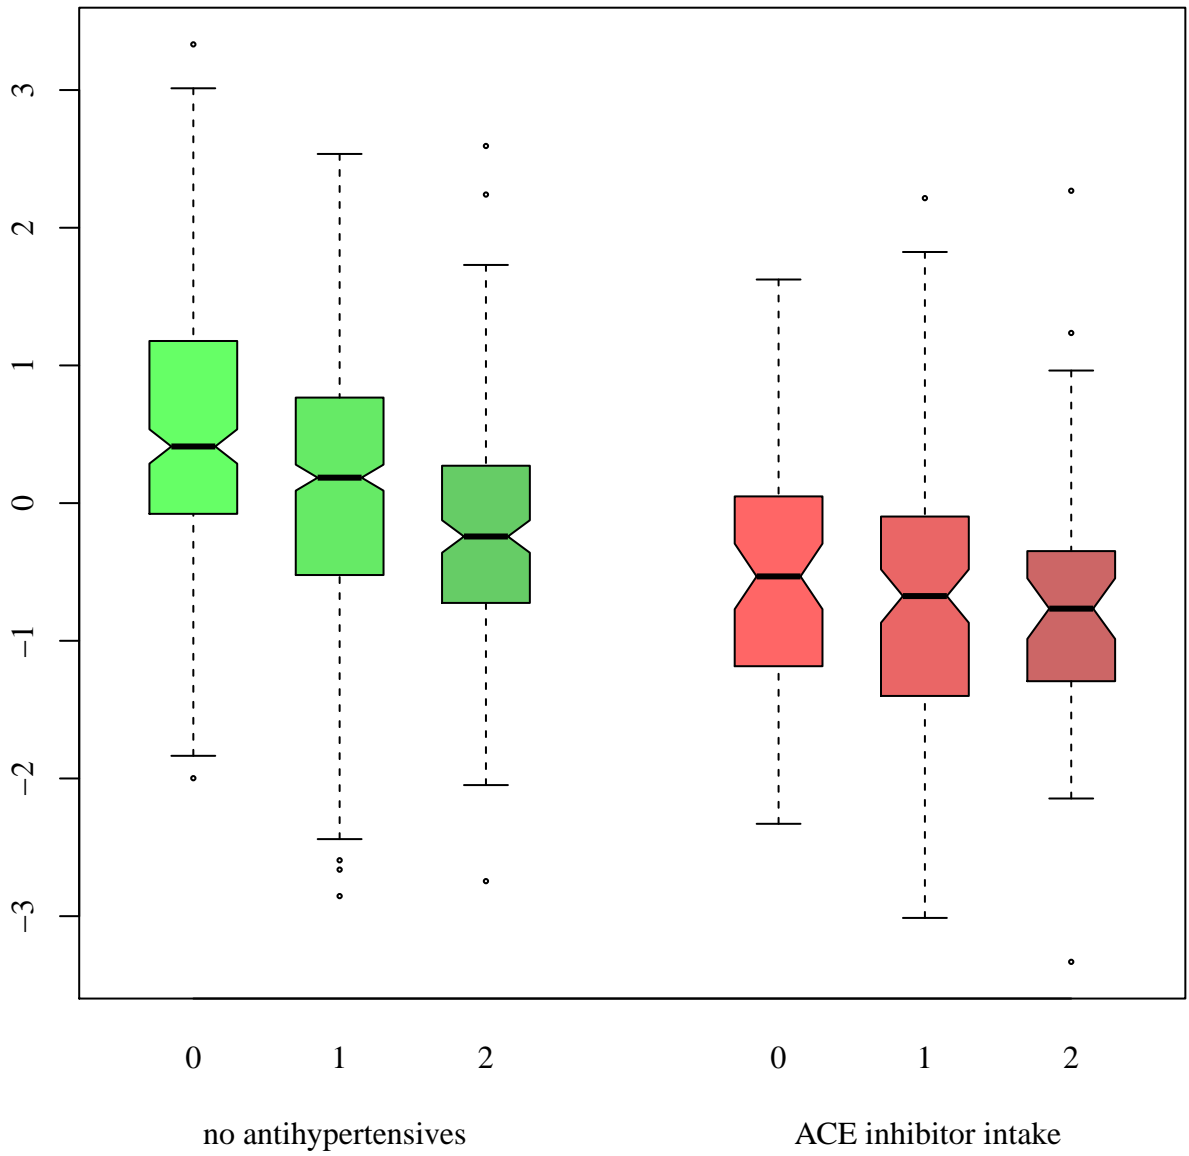

**X14086 – rs4323**

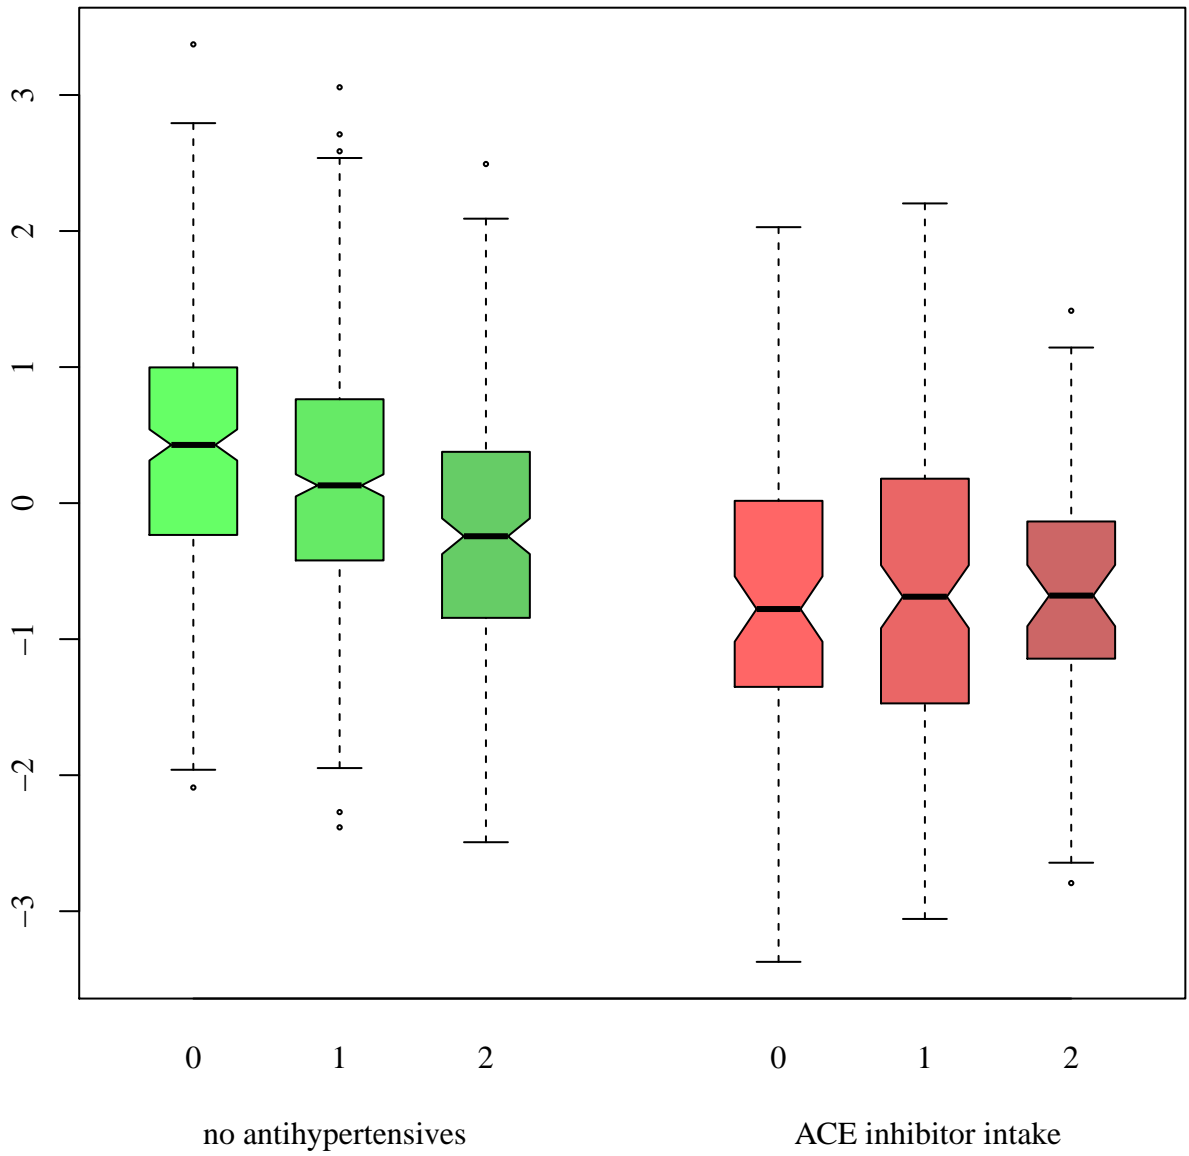



**X14189 – rs4323**

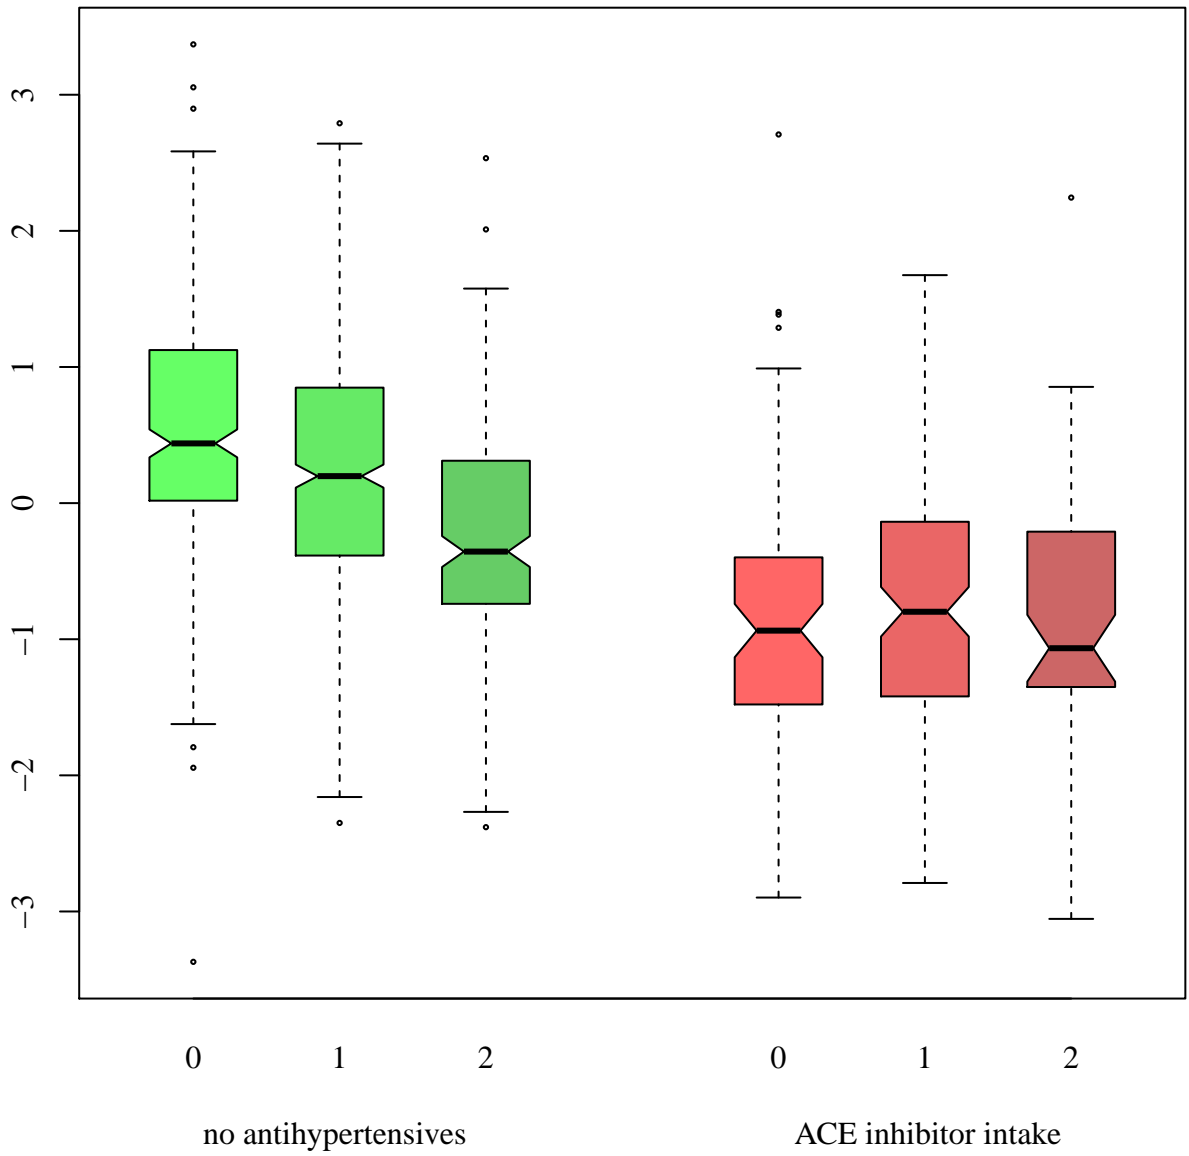

**X14205 – rs4323**

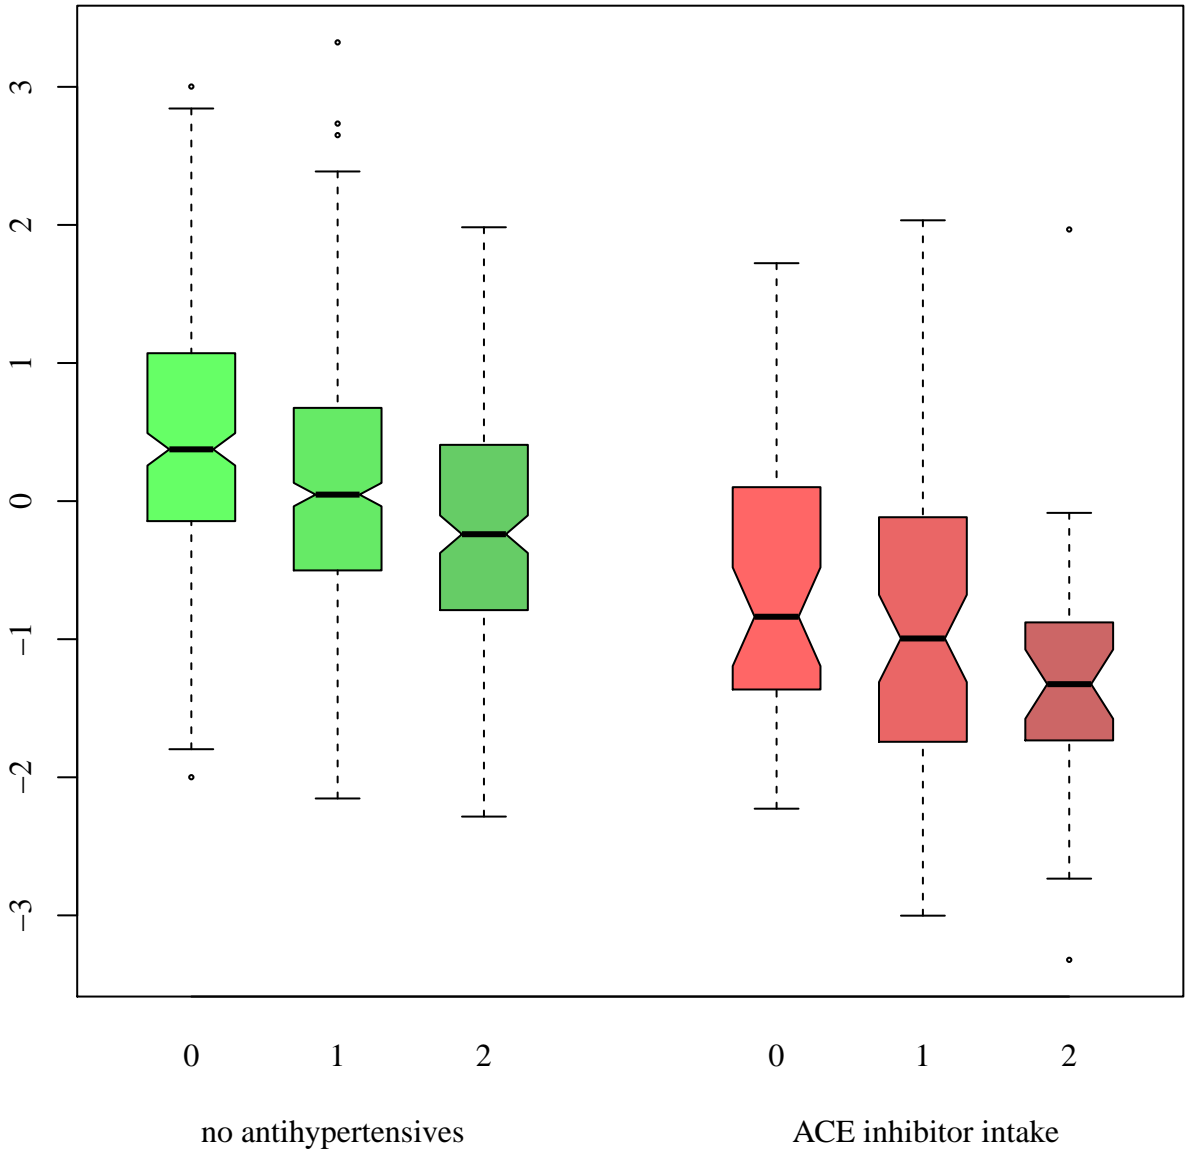

**X14208 – rs4323**

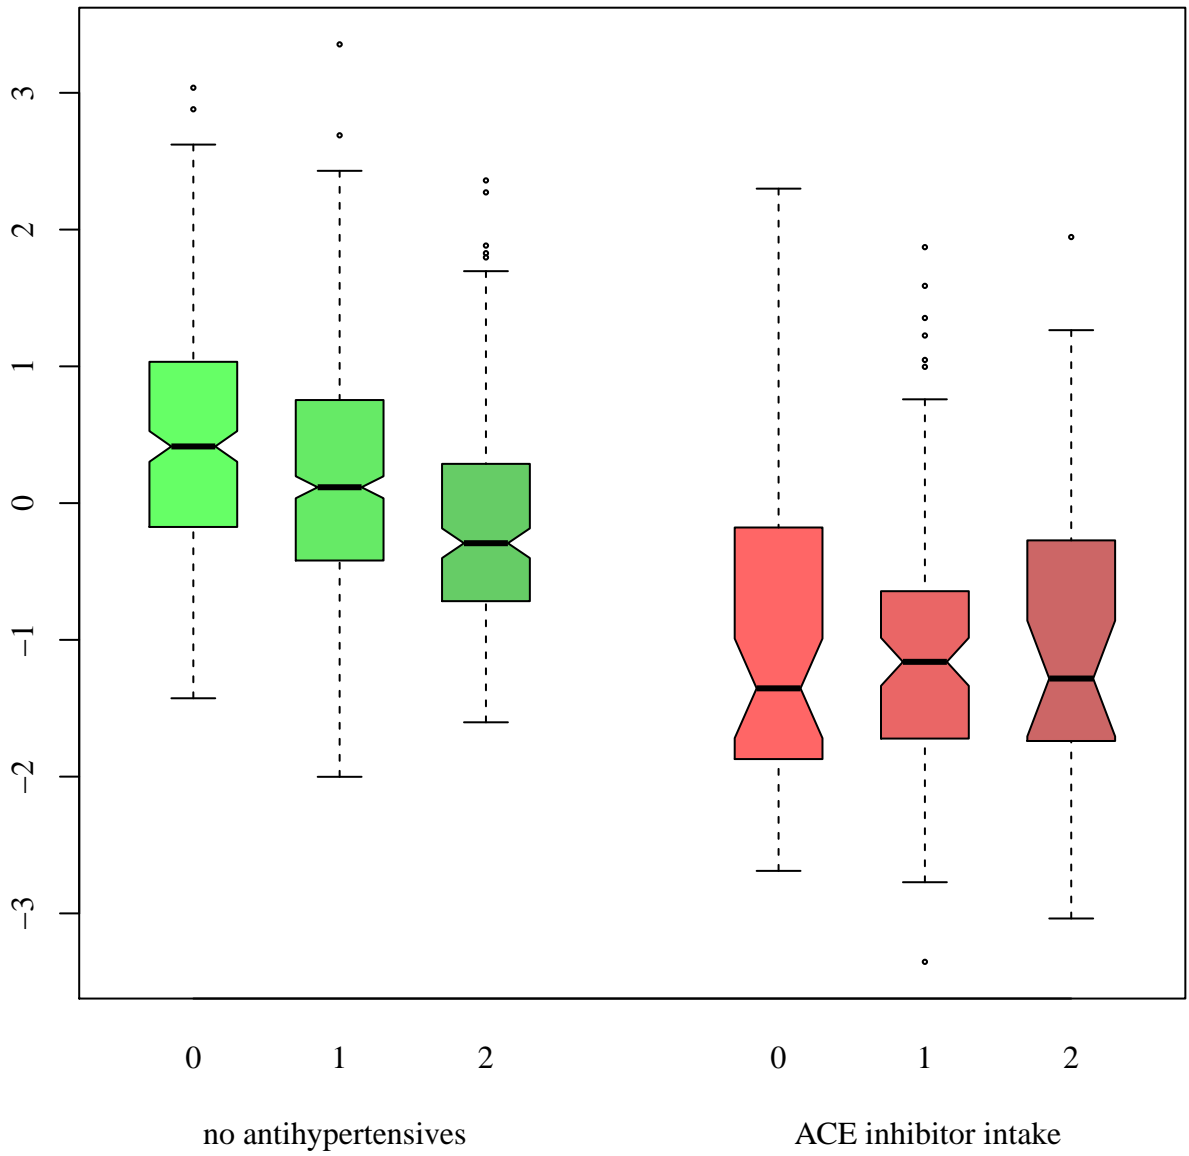

**X14304 – rs4323**

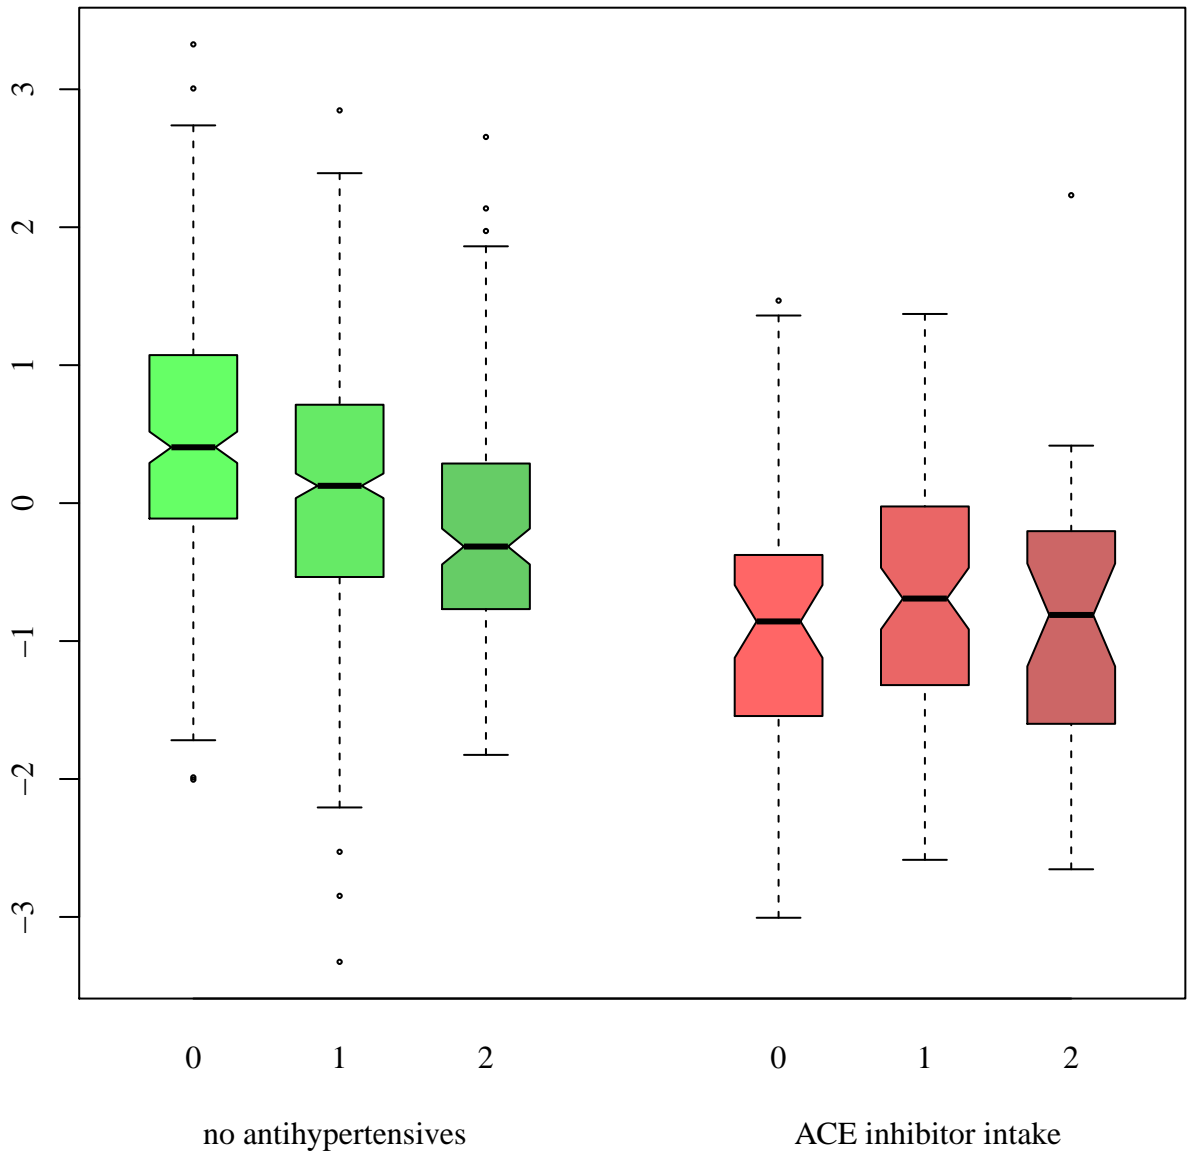

aspartylphenylalanine – rs4324



**aspartylphenylalanine/HWESASXX – rs4324**



**aspartylphenylalanine/X11805 – rs4324**



**aspartylphenylalanine/X14450 – rs4324**





**X14086 – rs4324**



**X14189 – rs4324**



**X14205 – rs4324**



**X14208 – rs4324**



**X14304 – rs4324**

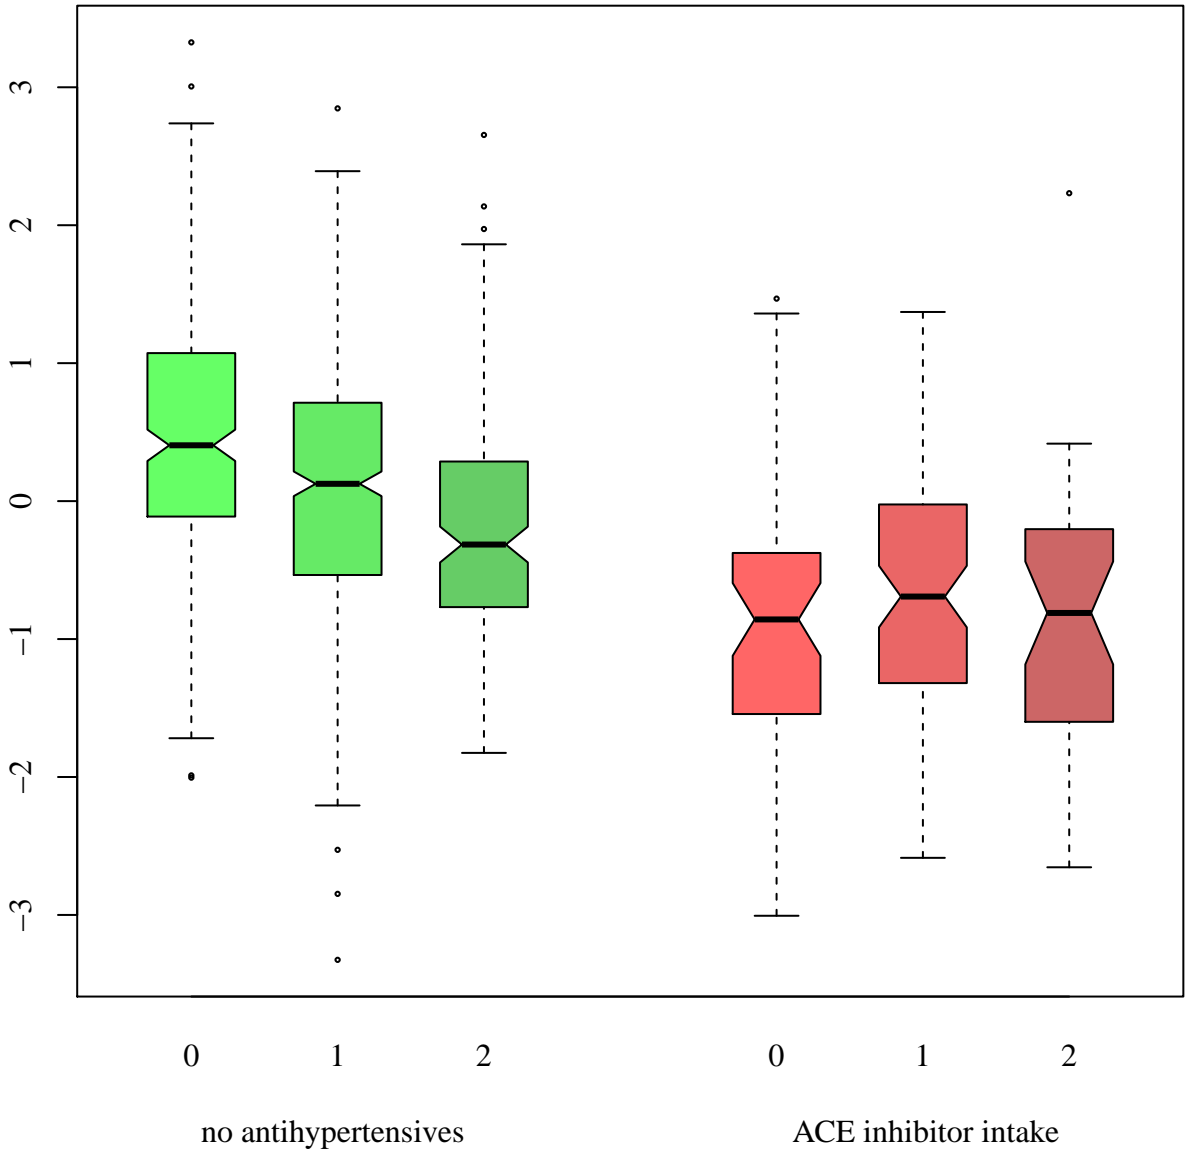

aspartylphenylalanine – rs4325

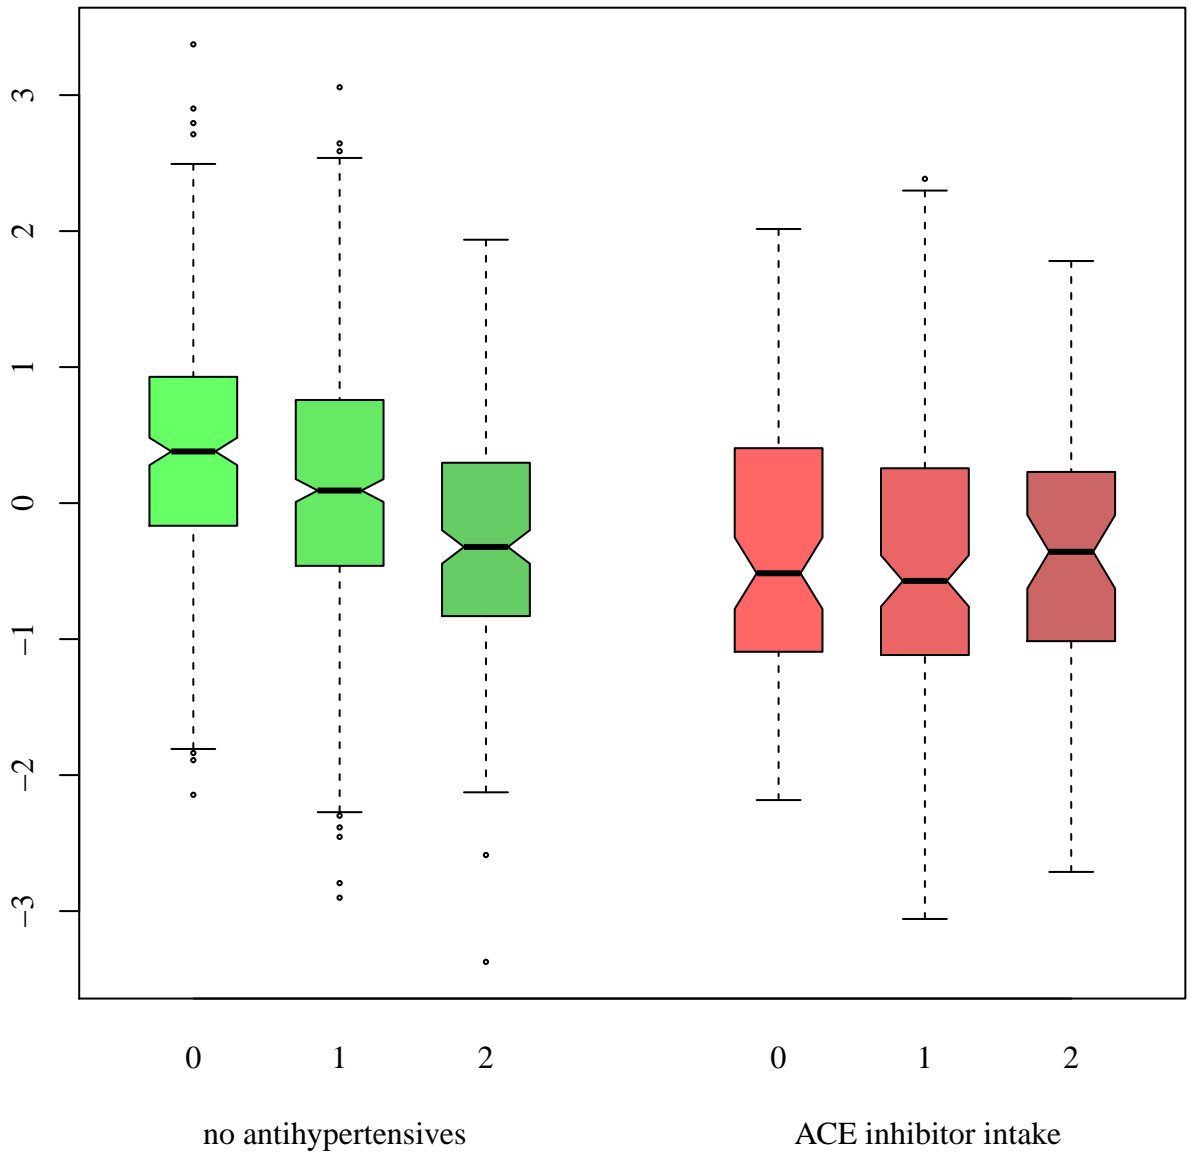

**aspartylphenylalanine/HWESASXX – rs4325**

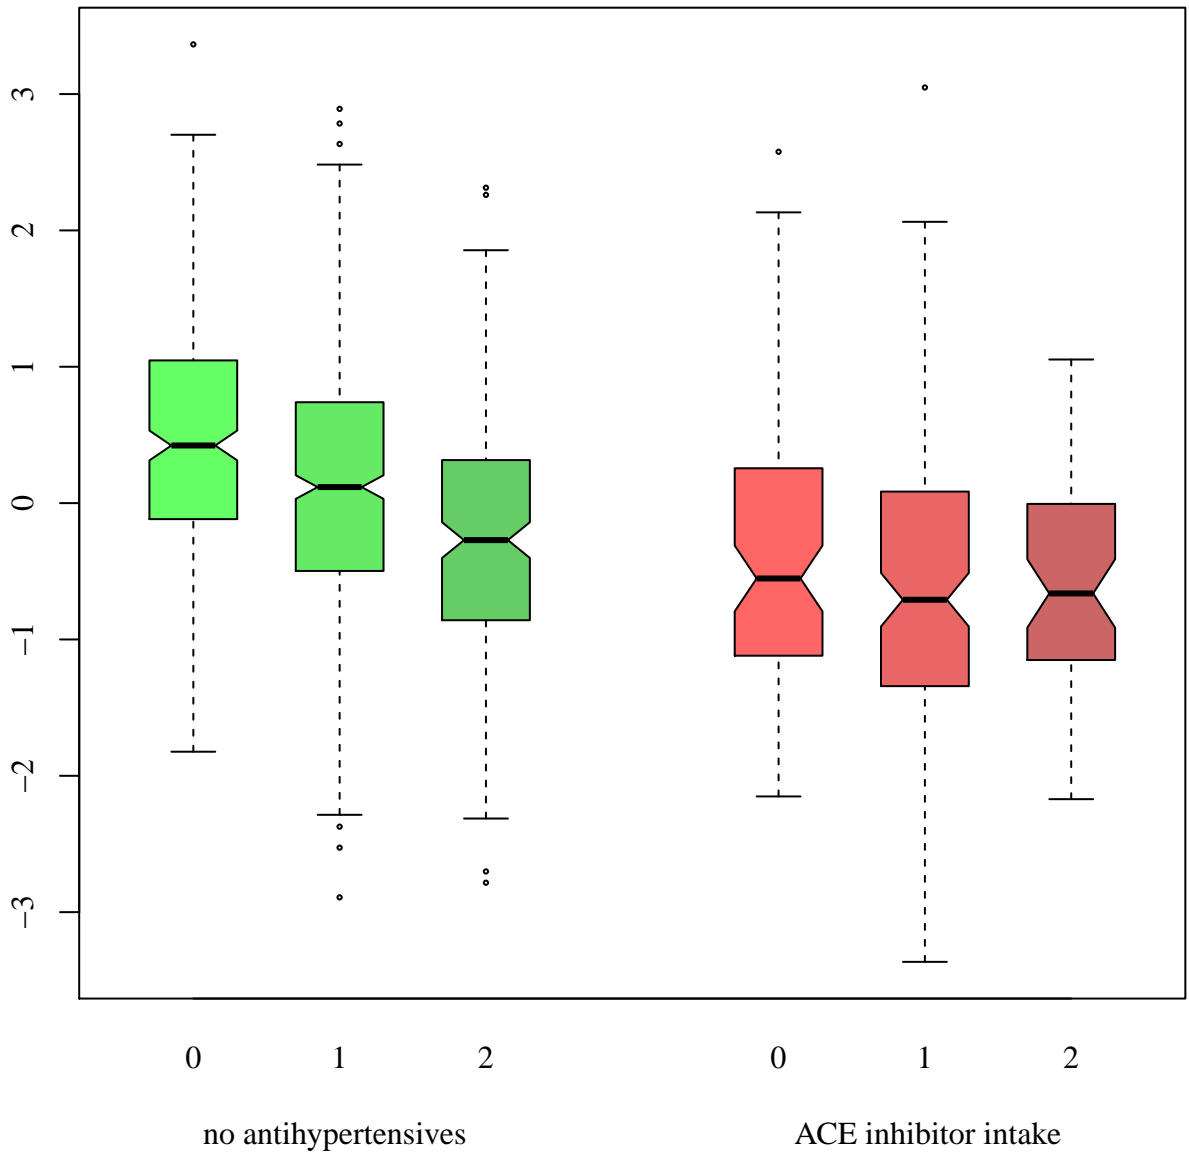

aspartylphenylalanine/X11805 – rs4325

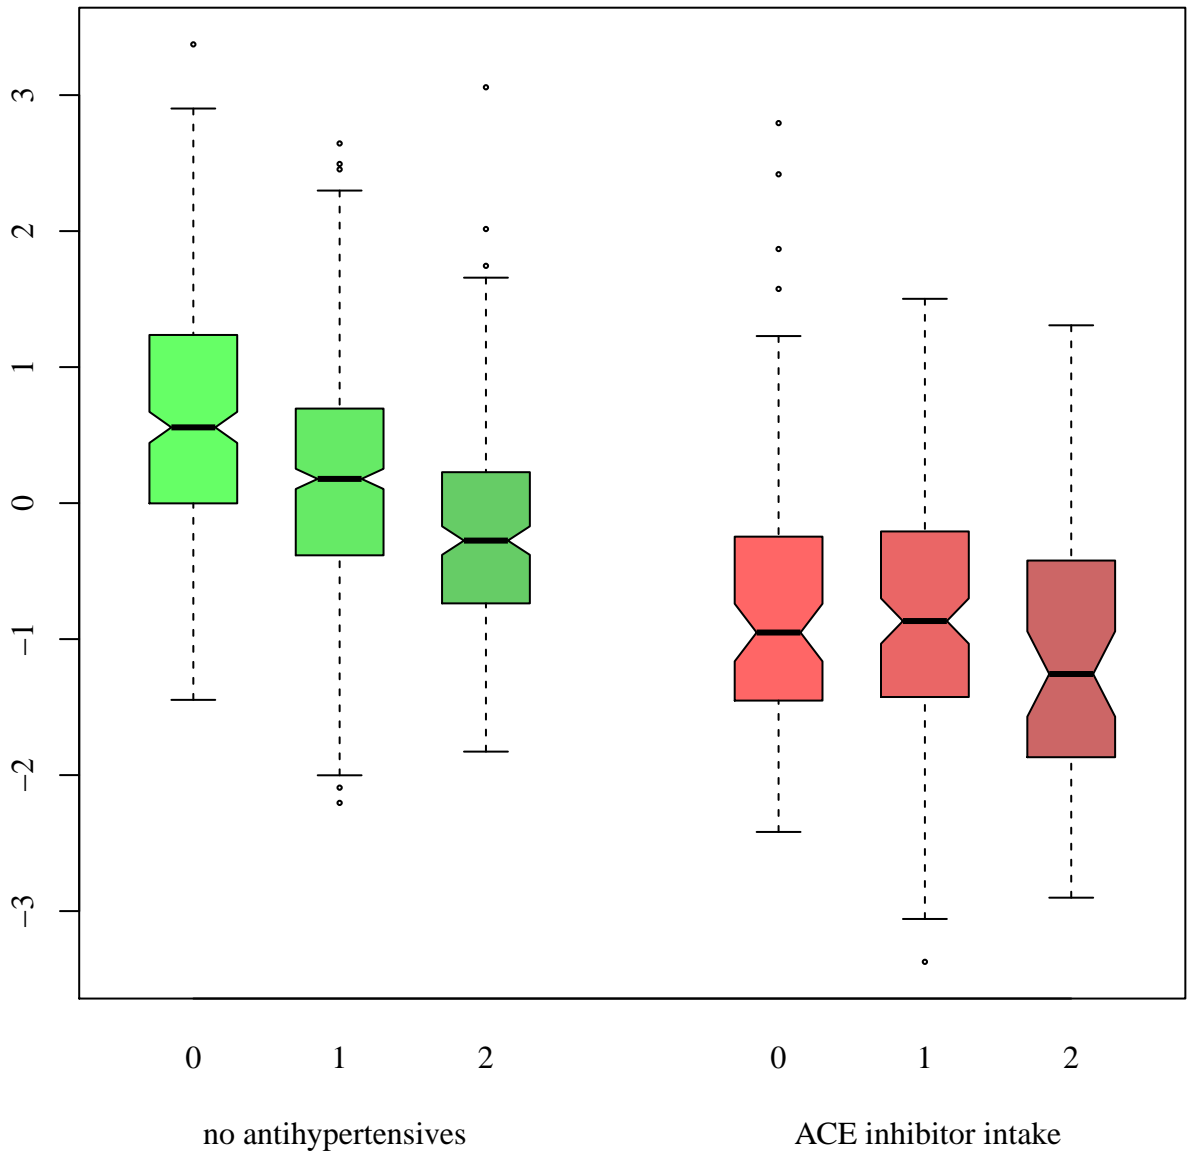



**aspartylphenylalanine/X14450 – rs4325**

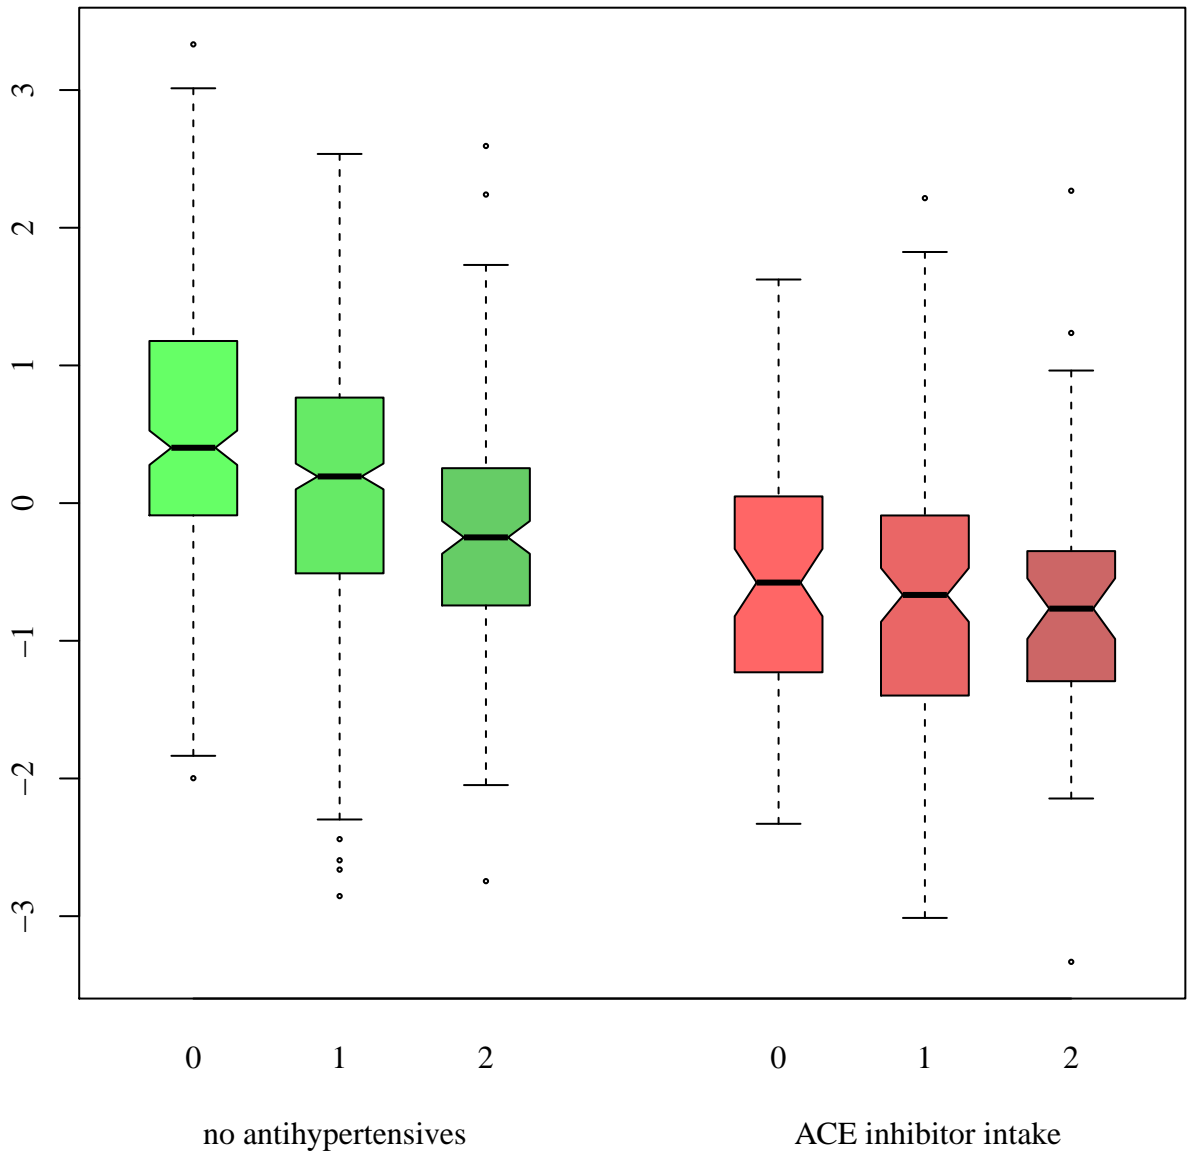

**X14086 – rs4325**

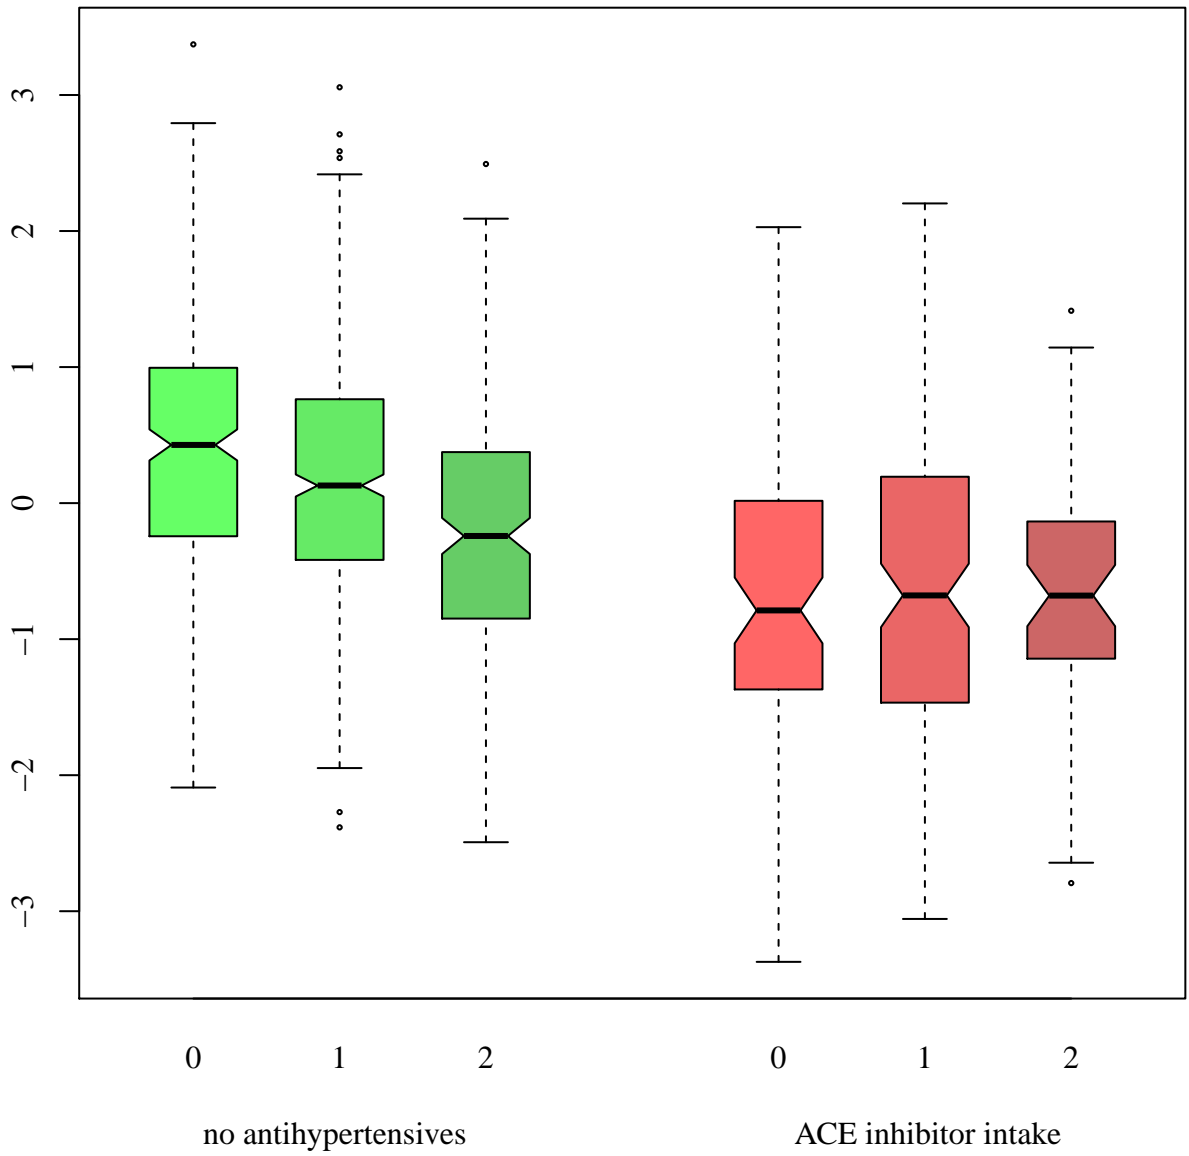

**X14189 – rs4325**

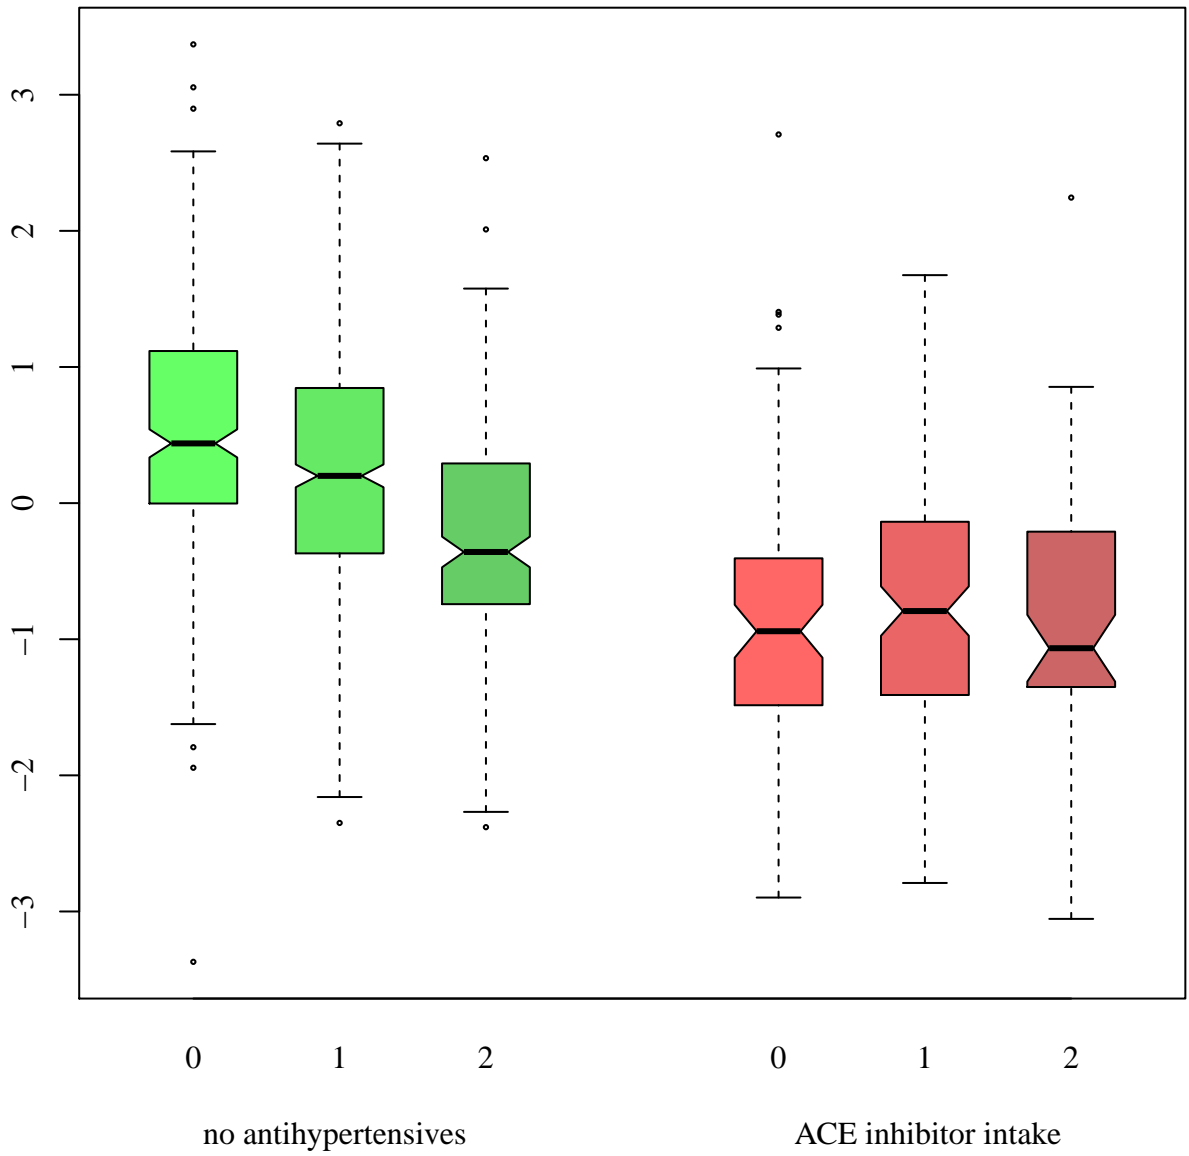

**X14205 – rs4325**

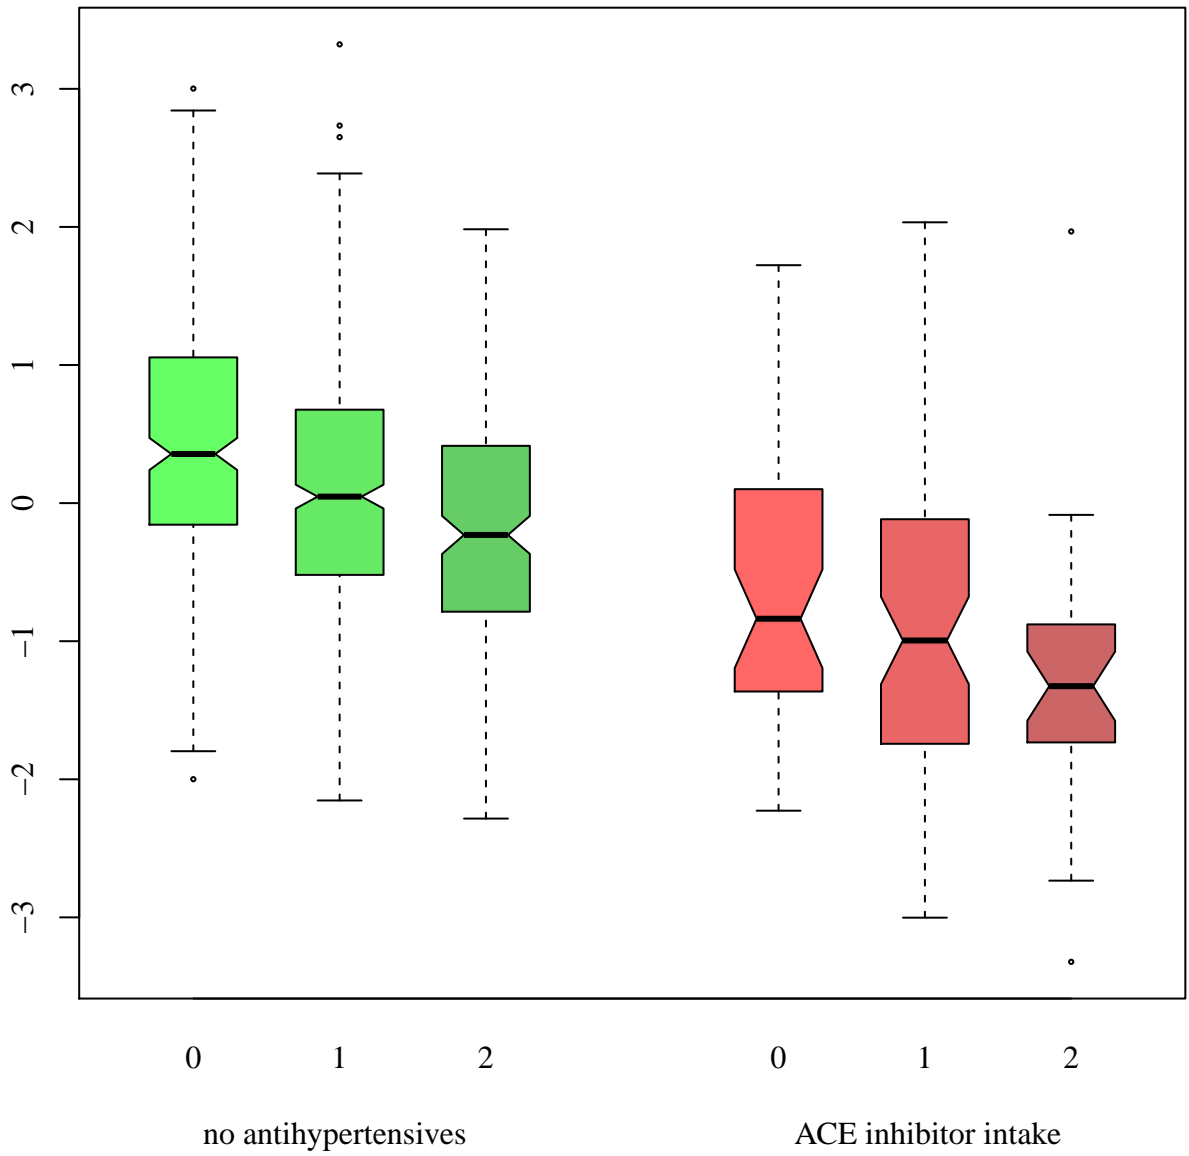

**X14208 – rs4325**

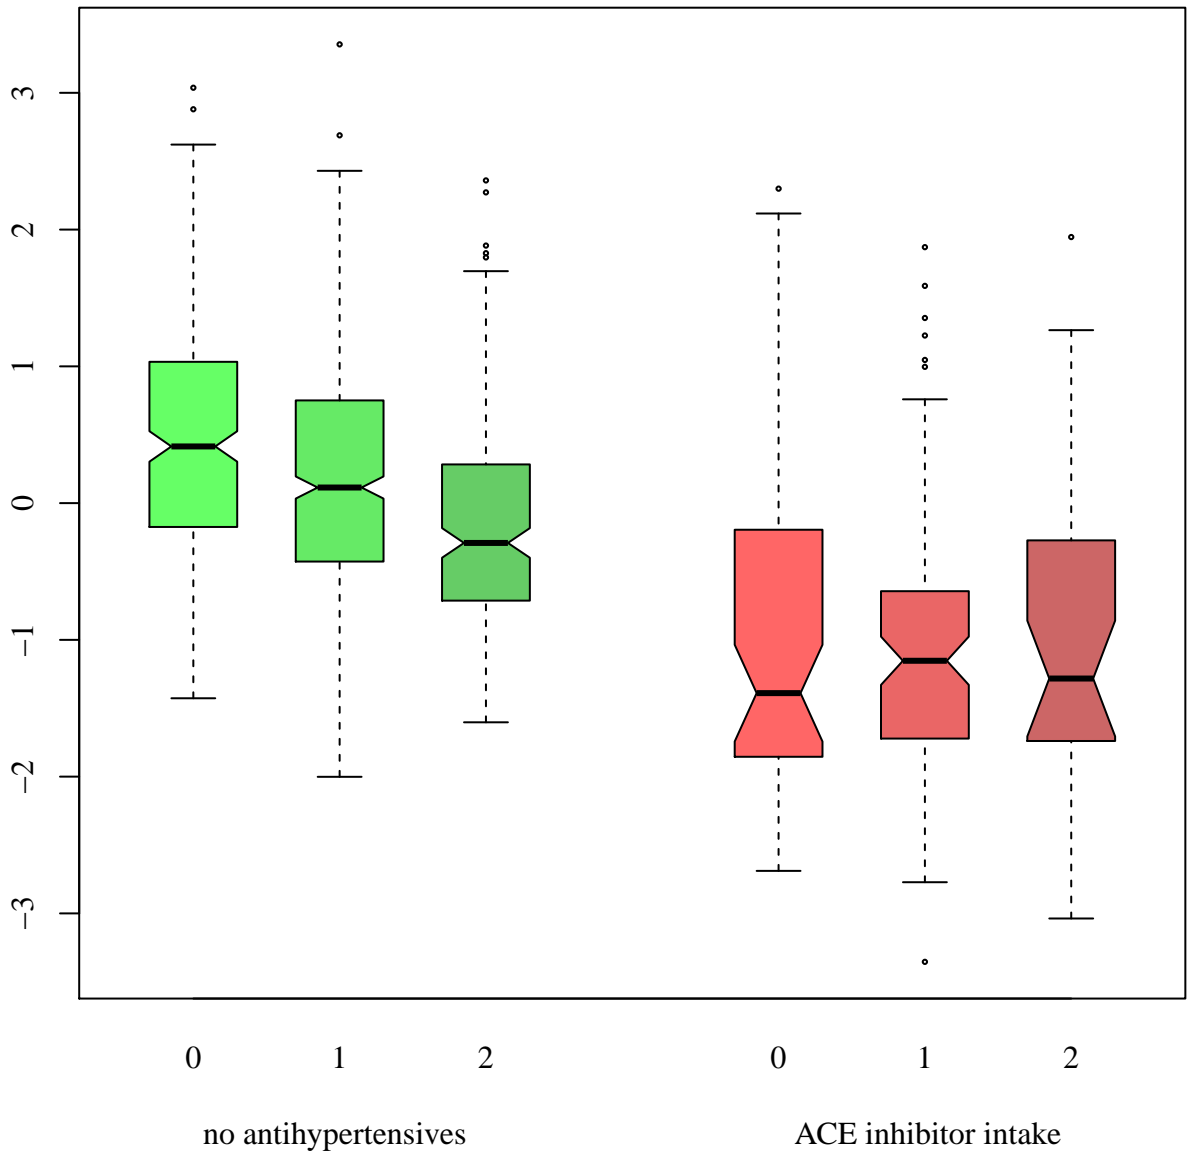

**X14304 – rs4325**

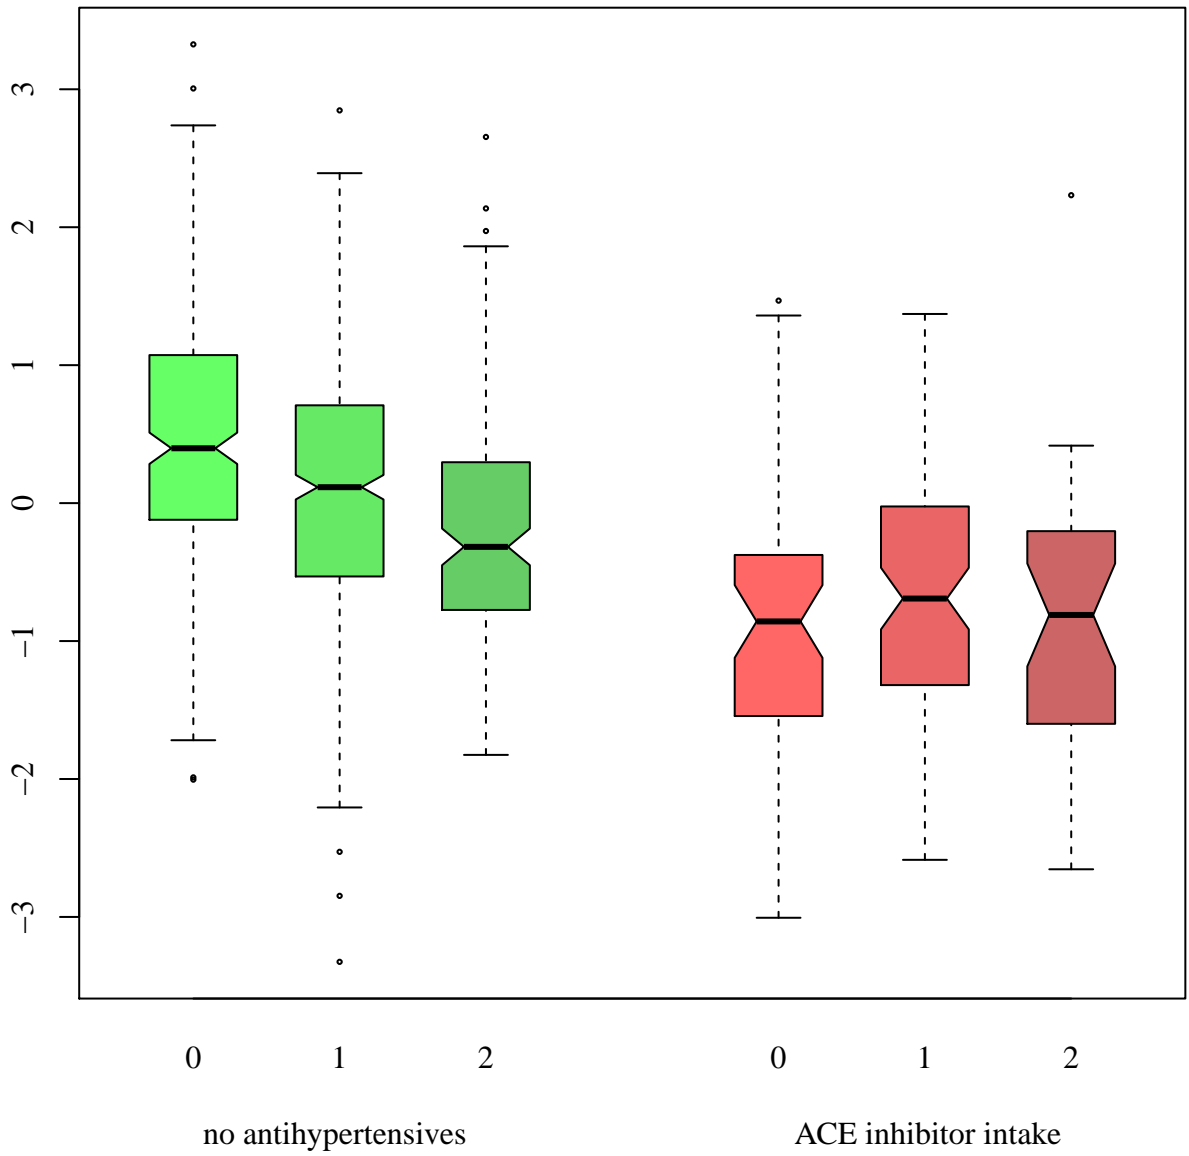

**aspartylphenylalanine – rs4326**



**aspartylphenylalanine/HWESASXX – rs4326**





aspartylphenylalanine/X11805 – rs4326



aspartylphenylalanine/X14450 – rs4326



**X14086 – rs4326**



**X14189 – rs4326**



**X14205 – rs4326**

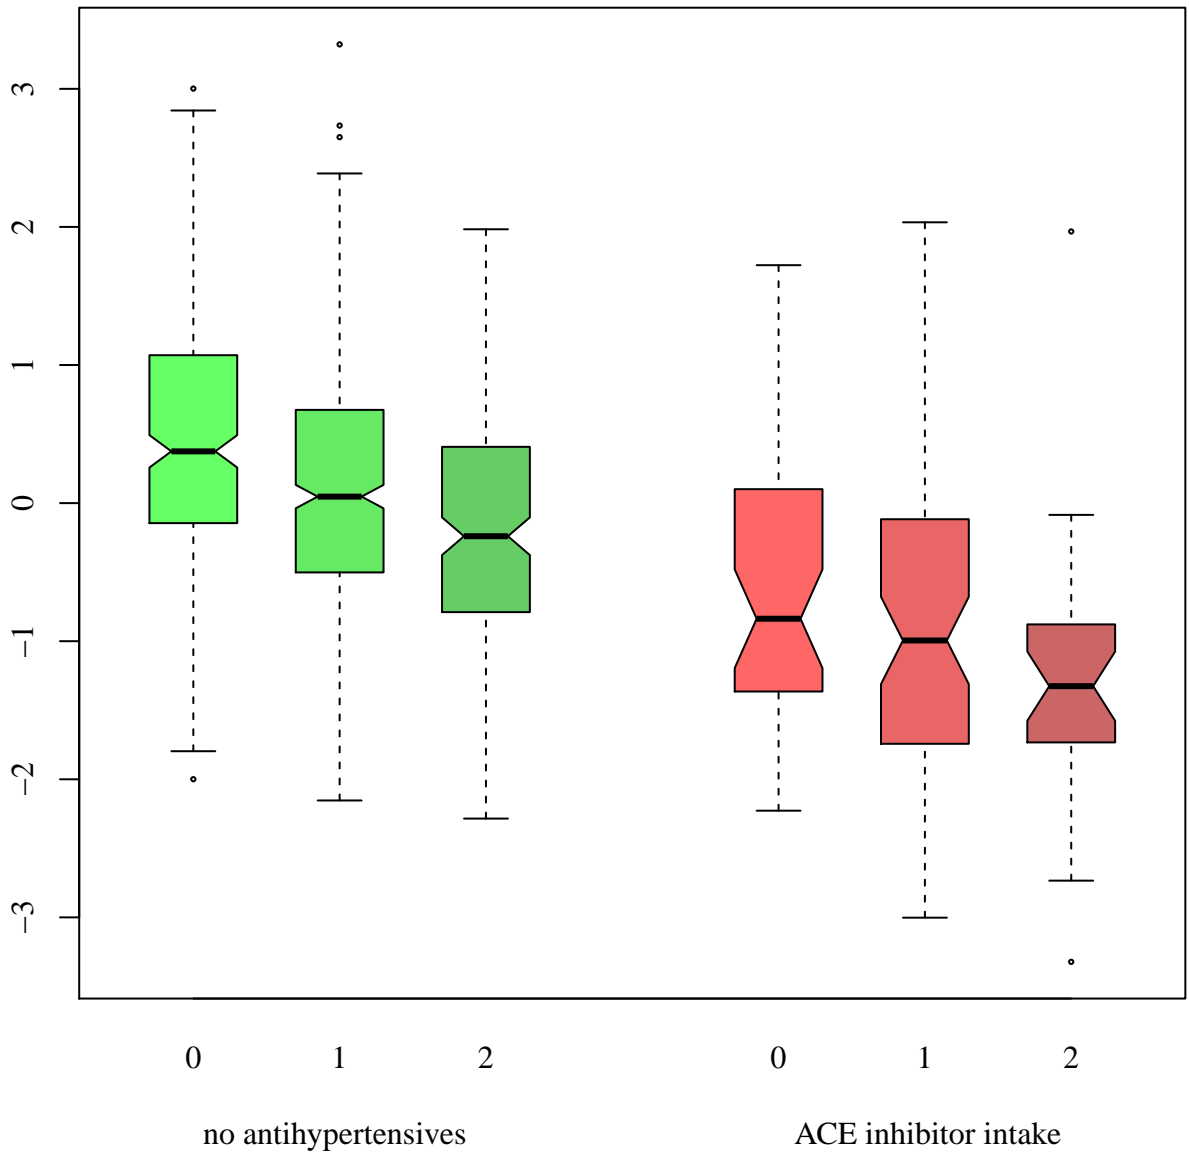

**X14208 – rs4326**



**X14304 – rs4326**



aspartylphenylalanine – rs4327





**aspartylphenylalanine/HWESASXX – rs4327**



aspartylphenylalanine/X11805 – rs4327



aspartylphenylalanine/X14450 – rs4327



**X14086 – rs4327**



**X14189 – rs4327**



**X14205 – rs4327**



**X14208 – rs4327**



**X14304 – rs4327**

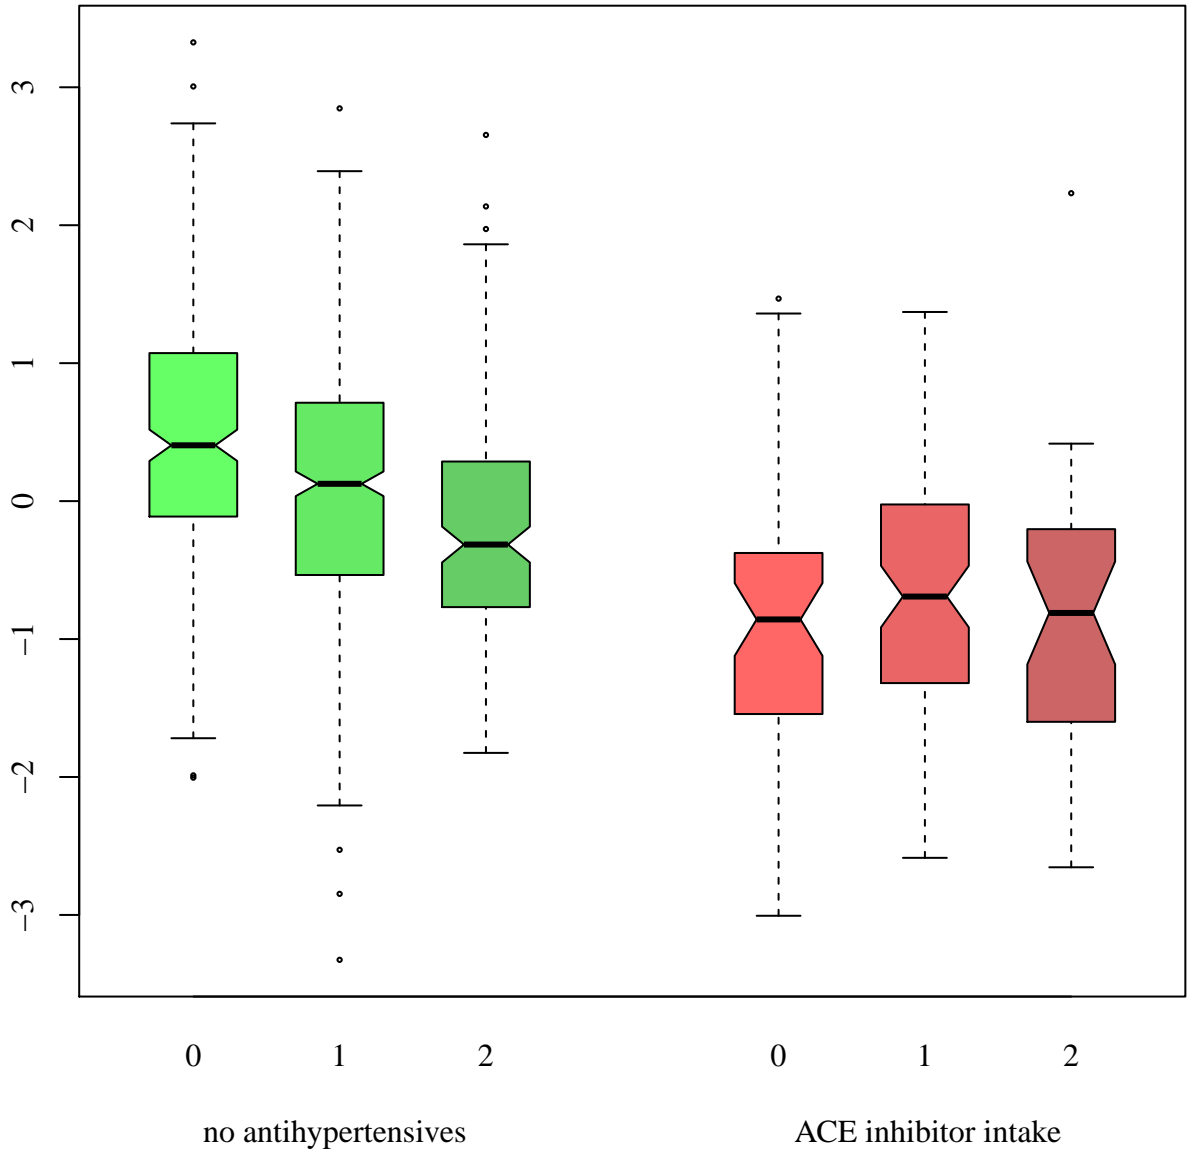



**aspartylphenylalanine – rs4329**



**aspartylphenylalanine/HWESASXX – rs4329**



aspartylphenylalanine/X11805 – rs4329



aspartylphenylalanine/X14450 – rs4329



**X14086 – rs4329**



**X14189 – rs4329**



**X14205 – rs4329**



**X14208 – rs4329**





**X14304 – rs4329**



### aspartylphenylalanine – rs4331



**aspartylphenylalanine/HWESASXX – rs4331**



**aspartylphenylalanine/X11805 – rs4331**



**aspartylphenylalanine/X14450 – rs4331**



**X14086 – rs4331**

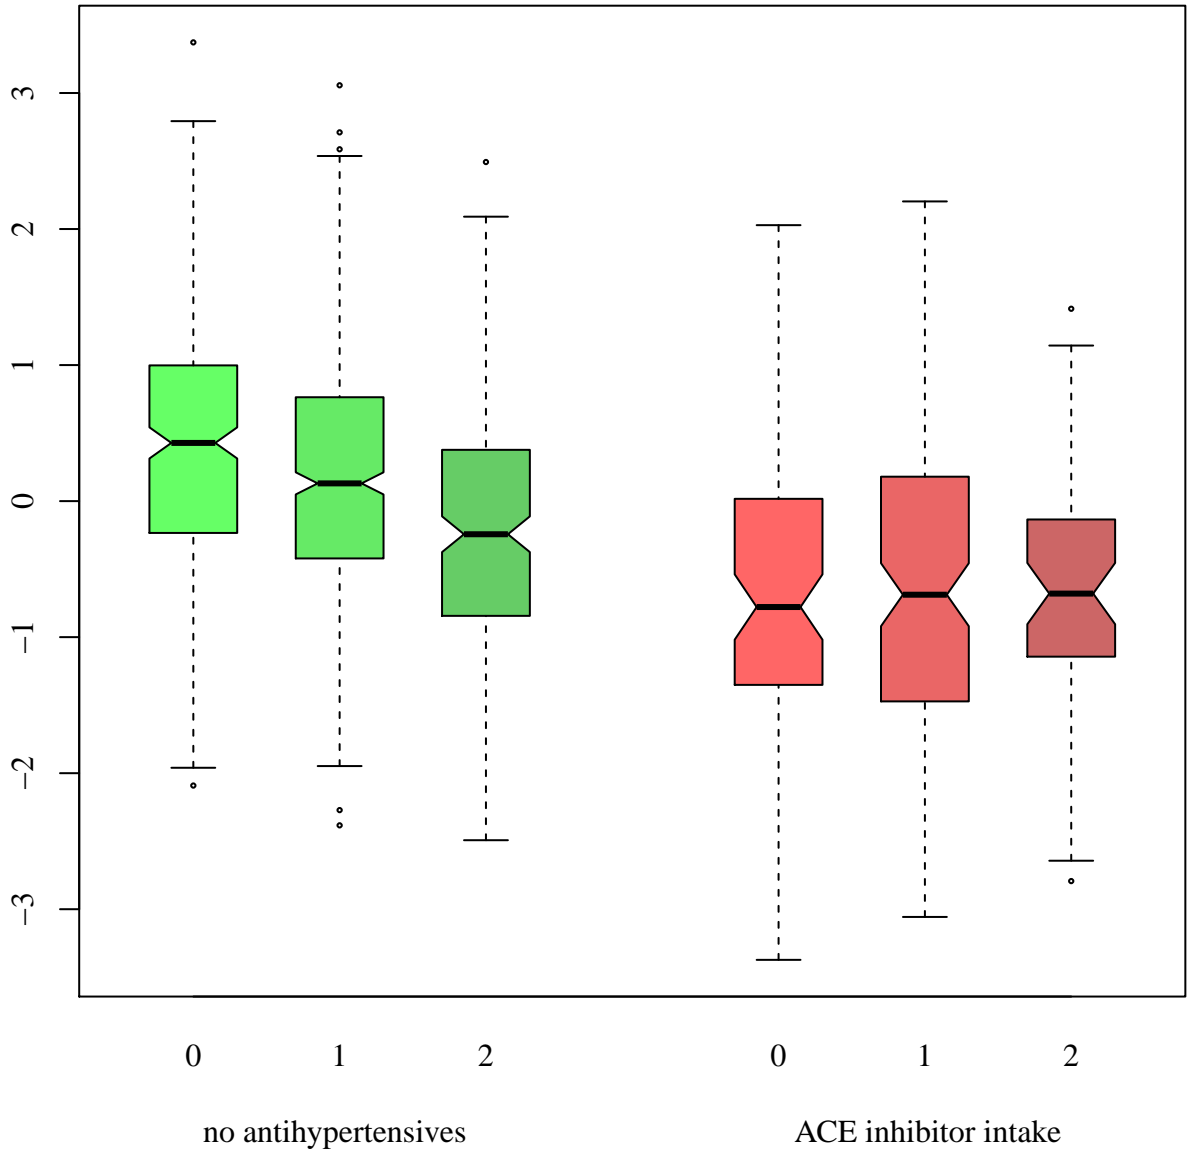

**X14189 – rs4331**

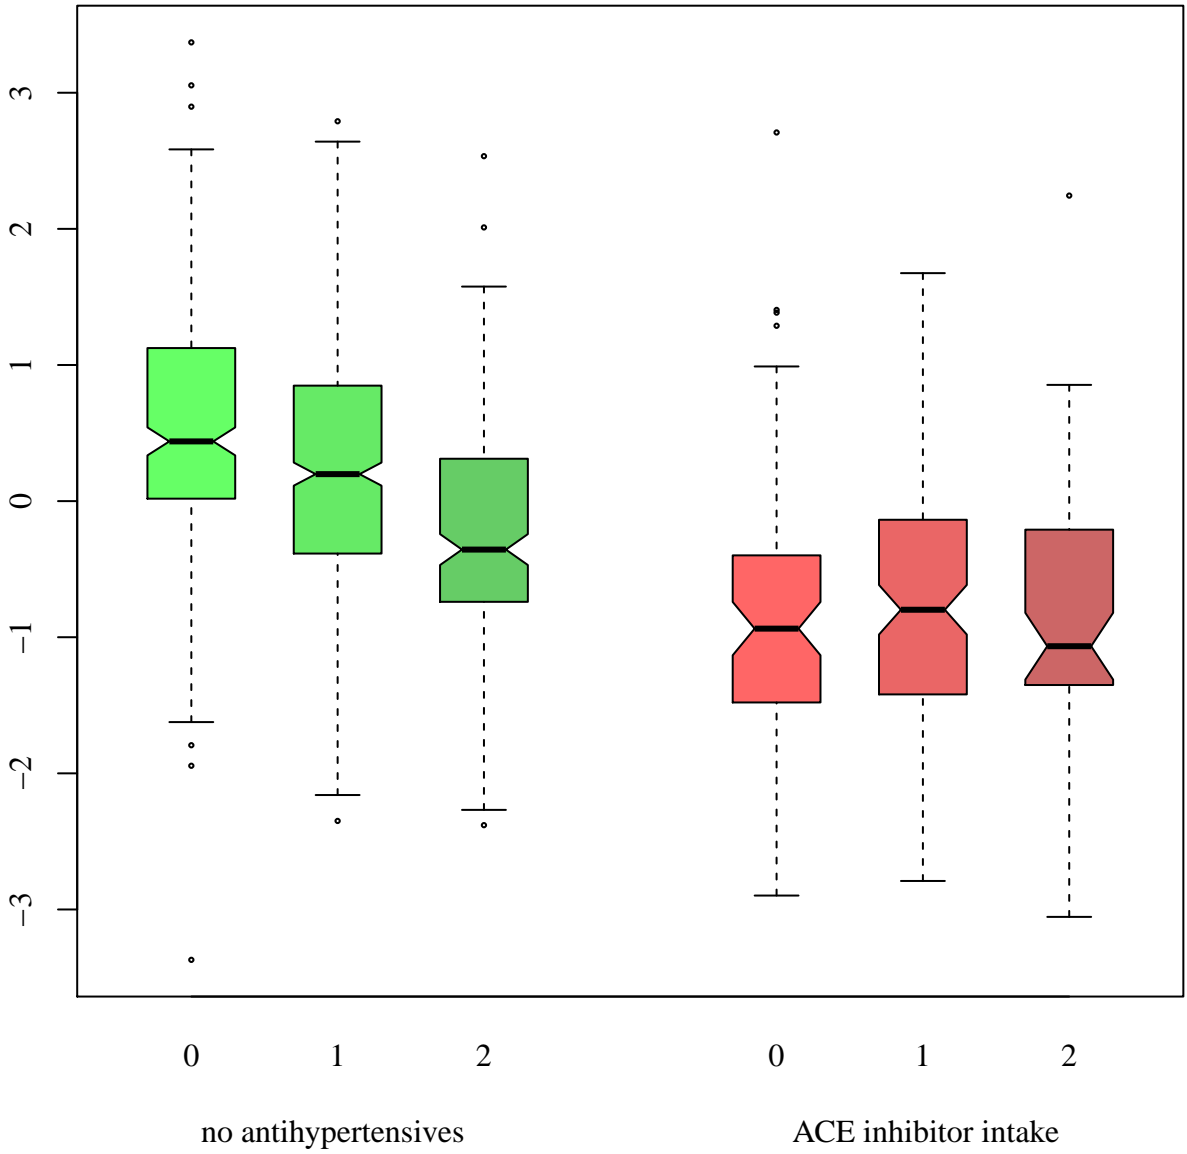

**X14205 – rs4331**





**X14208 – rs4331**

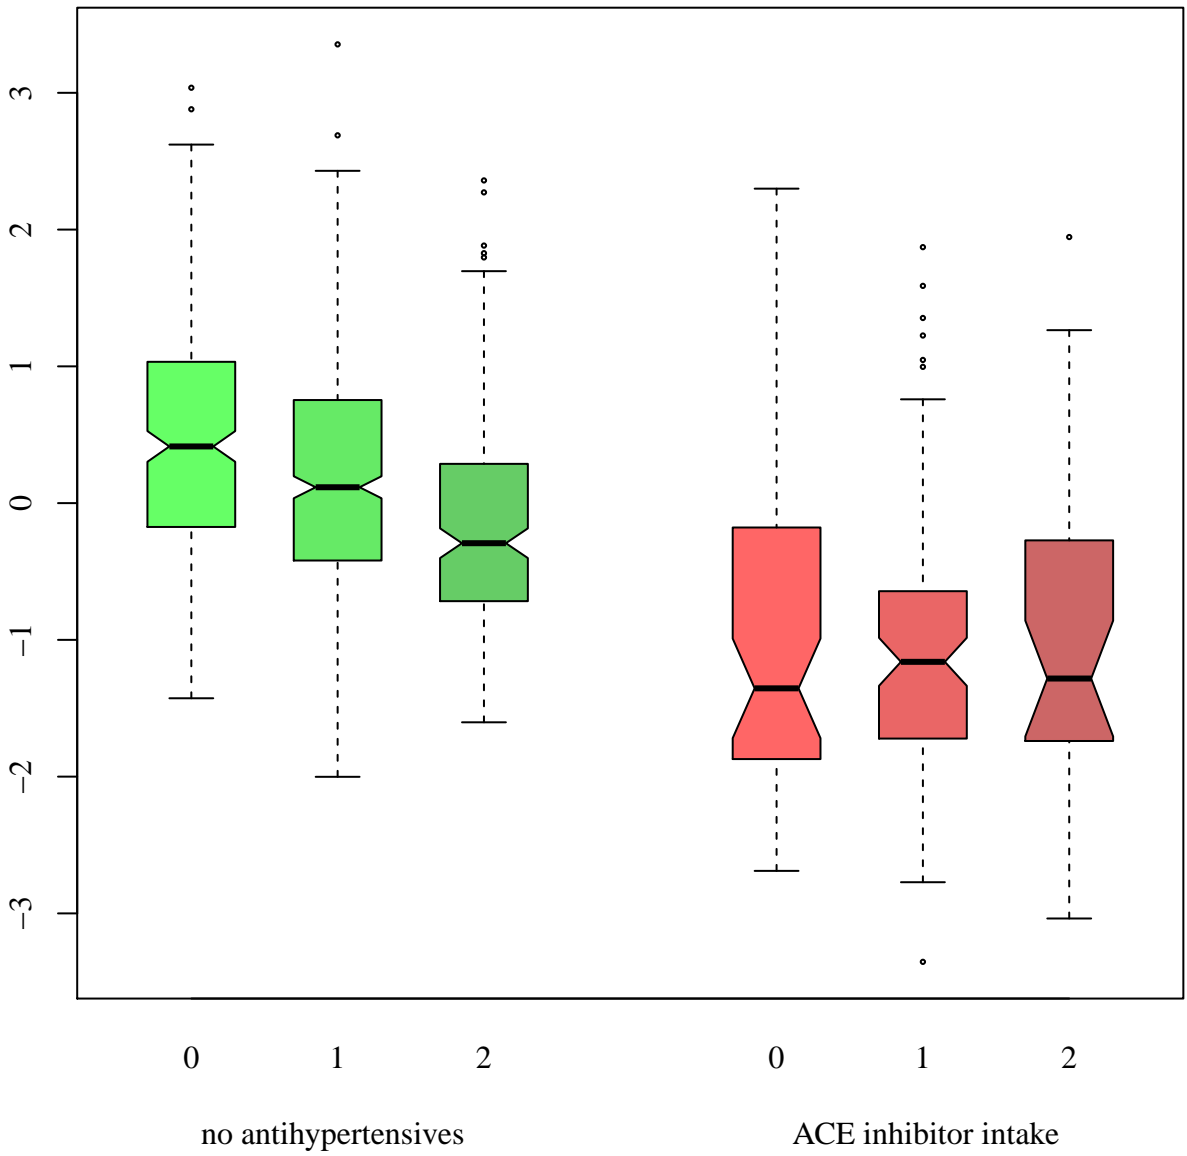

**X14304 – rs4331**



aspartylphenylalanine – rs4332



**aspartylphenylalanine/HWESASXX – rs4332**



aspartylphenylalanine/X11805 – rs4332



**aspartylphenylalanine/X14450 – rs4332**



**X14086 – rs4332**



**X14189 – rs4332**





**X14205 – rs4332**



**X14208 – rs4332**



**X14304 – rs4332**



**aspartylphenylalanine – rs4334**

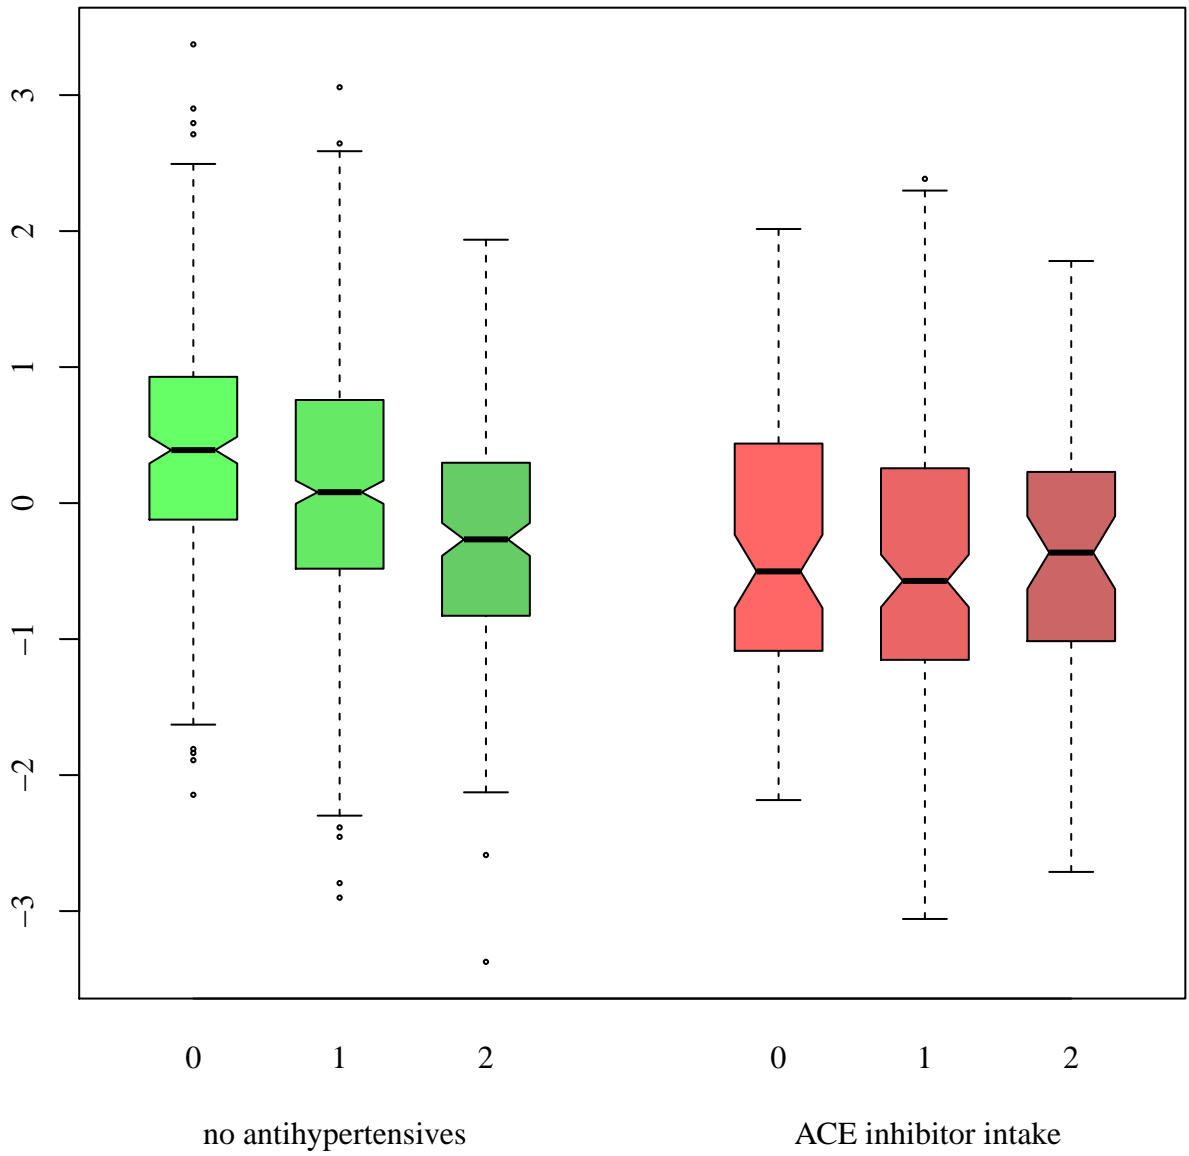

**aspartylphenylalanine/HWESASXX – rs4334**

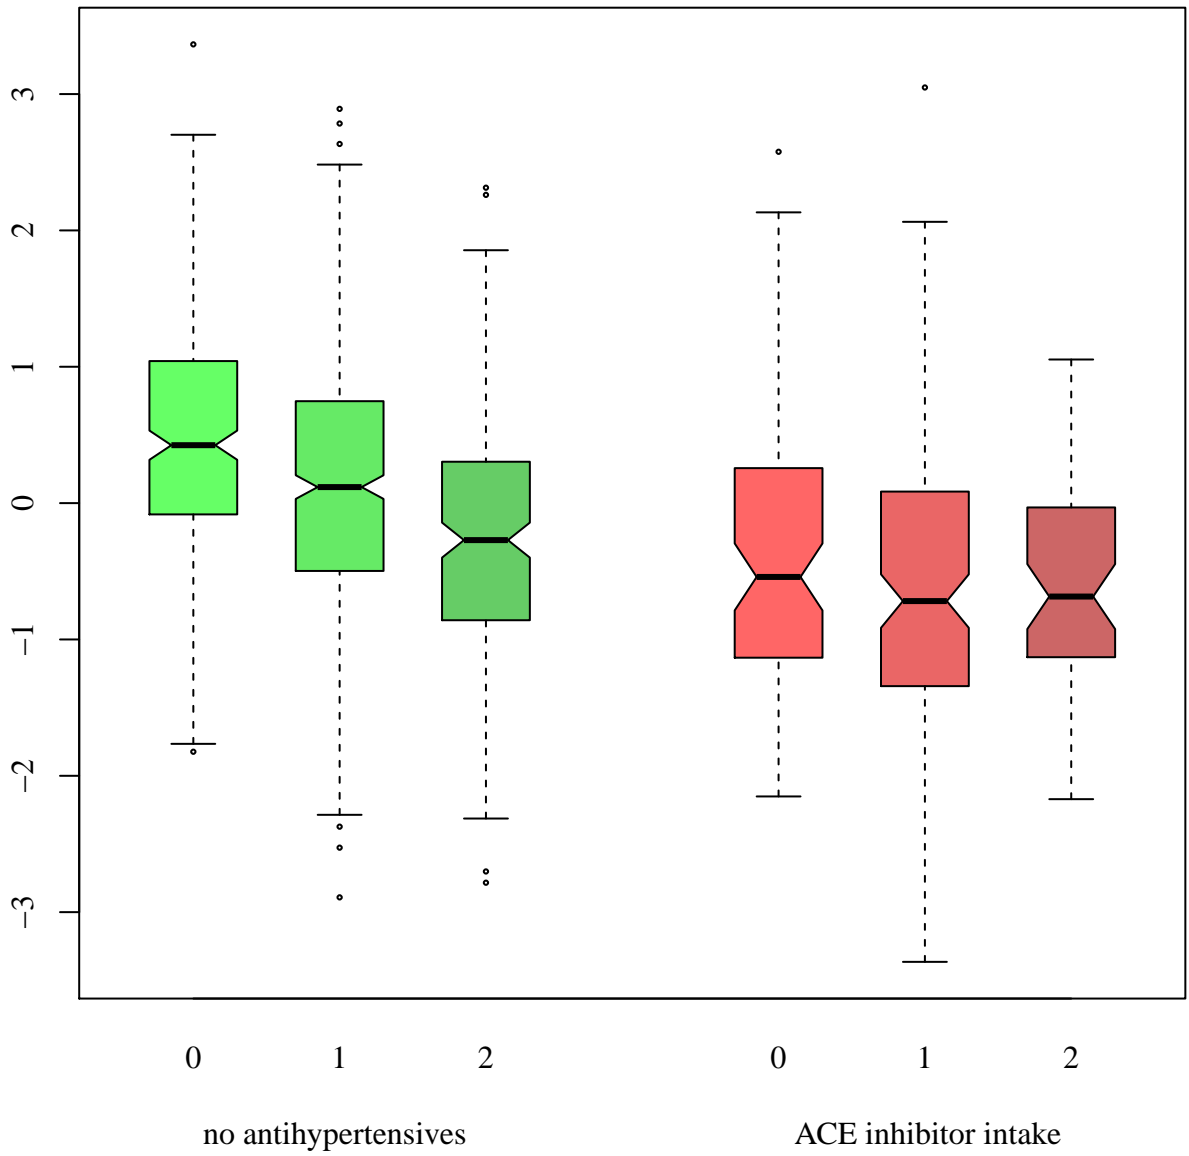

aspartylphenylalanine/X11805 – rs4334

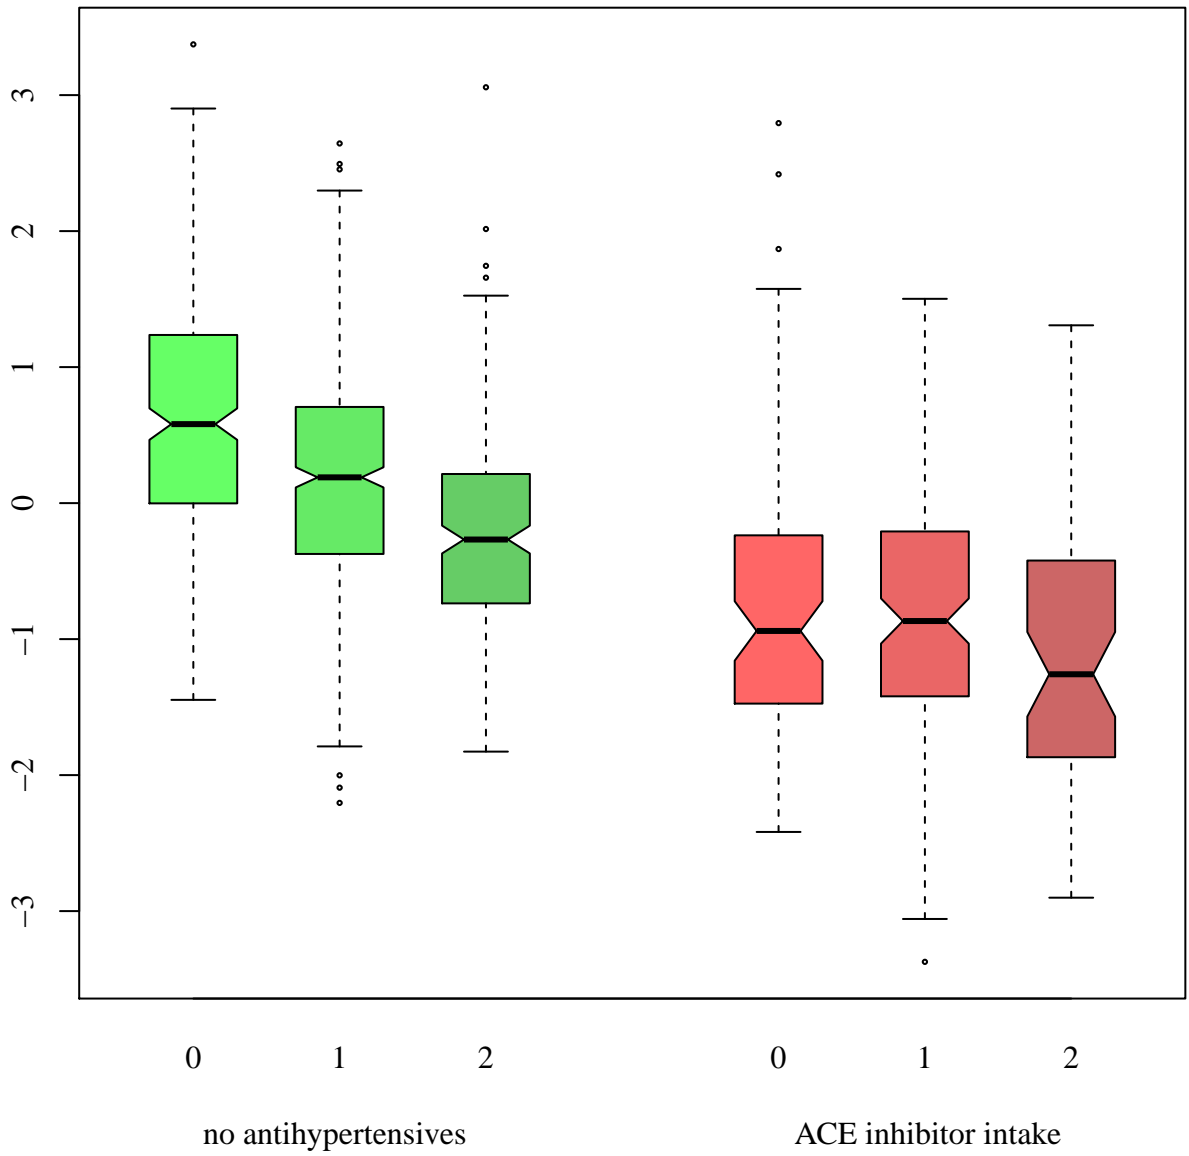

**aspartylphenylalanine/X14450 – rs4334**

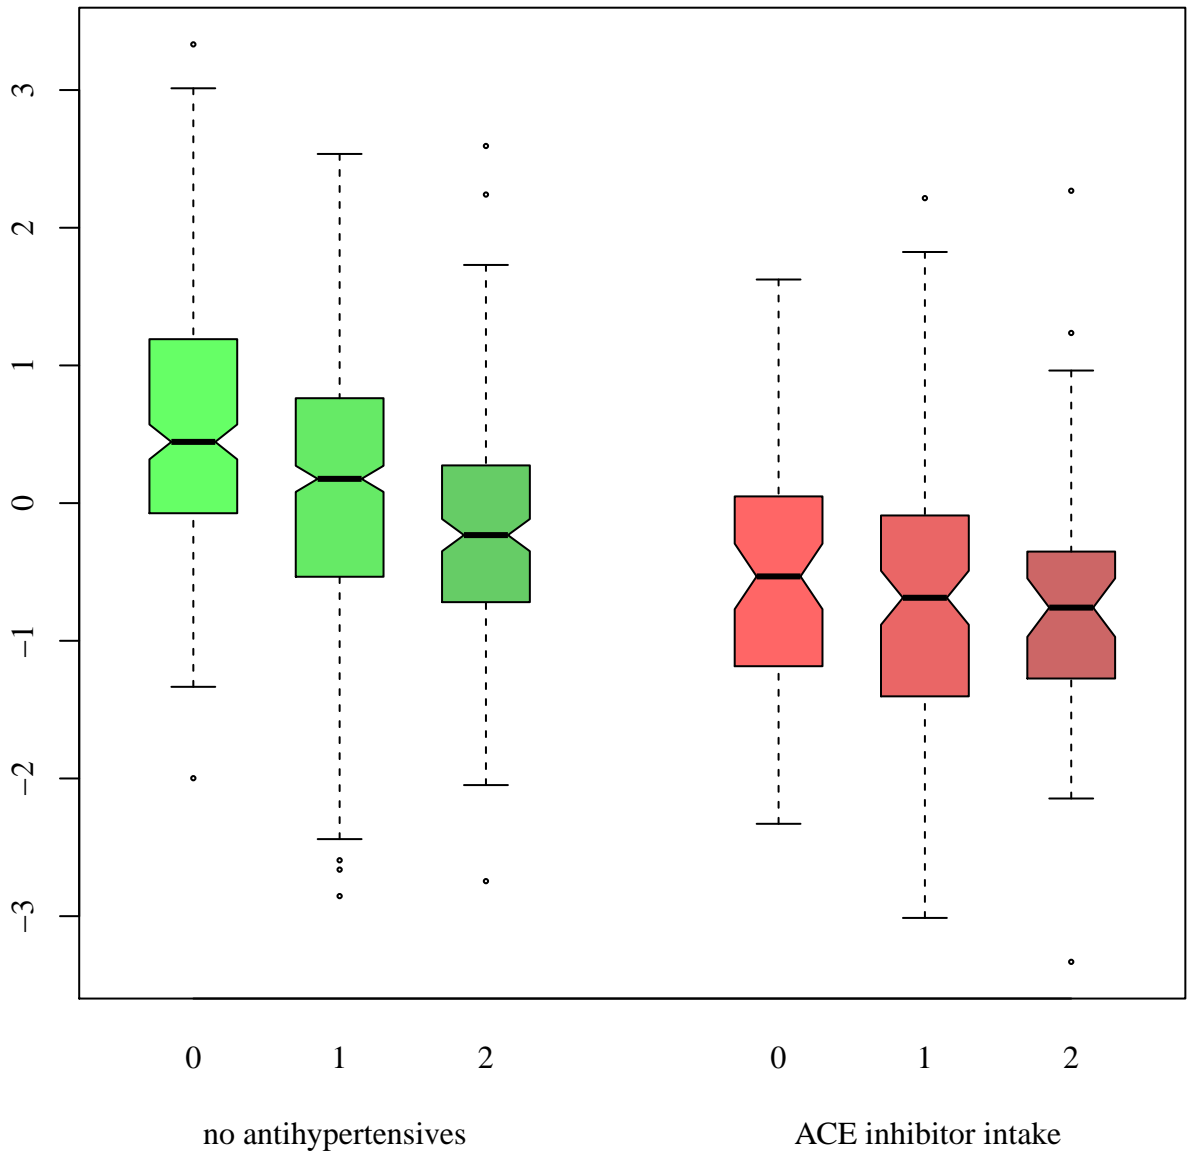

**X14086 – rs4334**

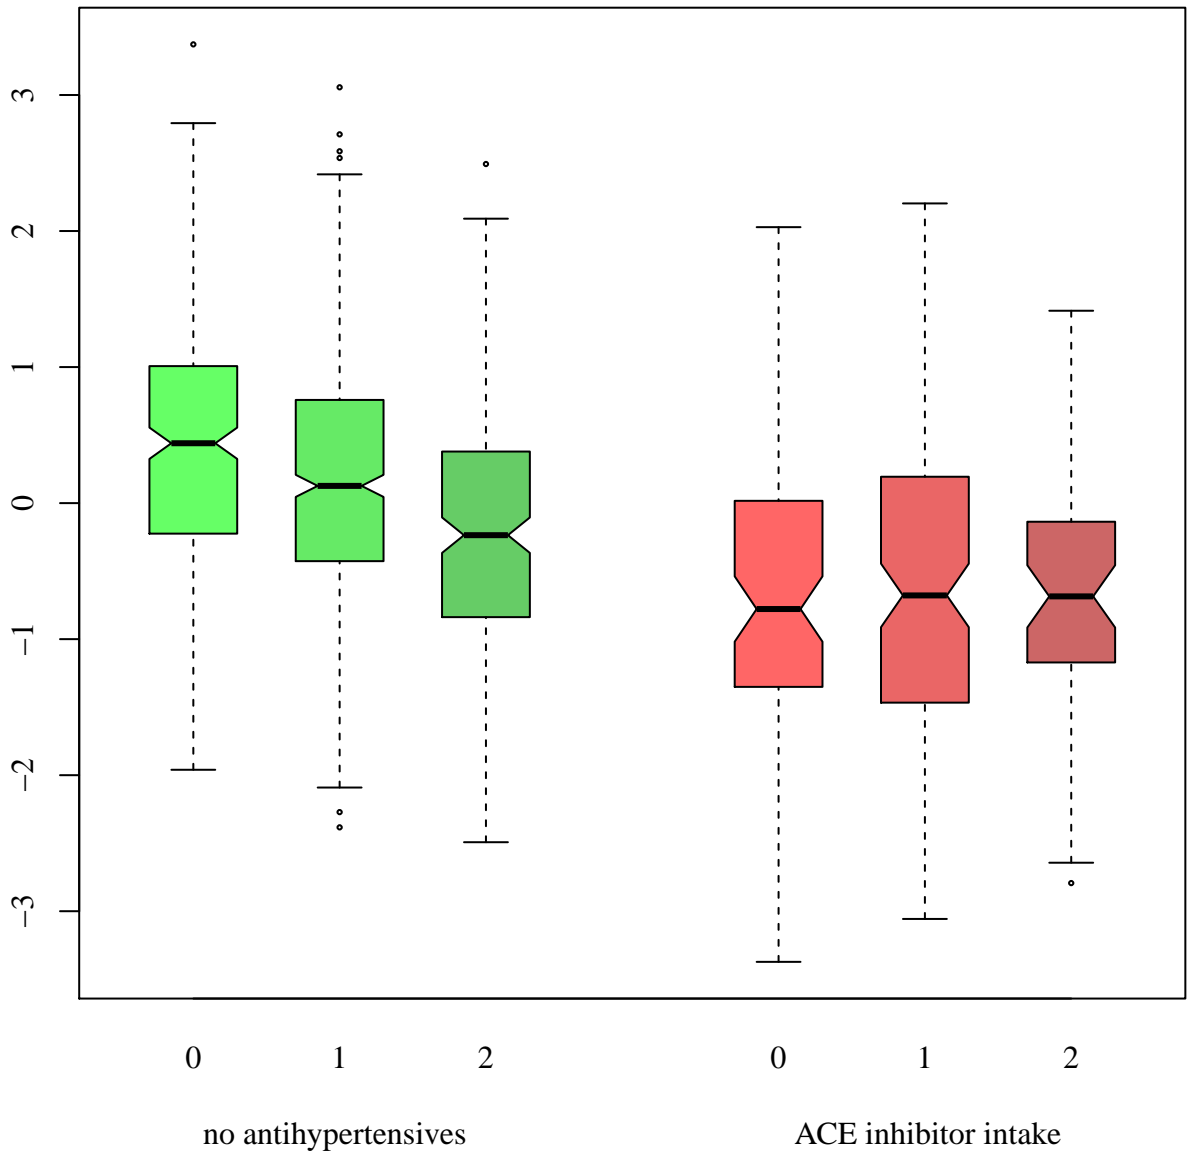



**X14189 – rs4334**

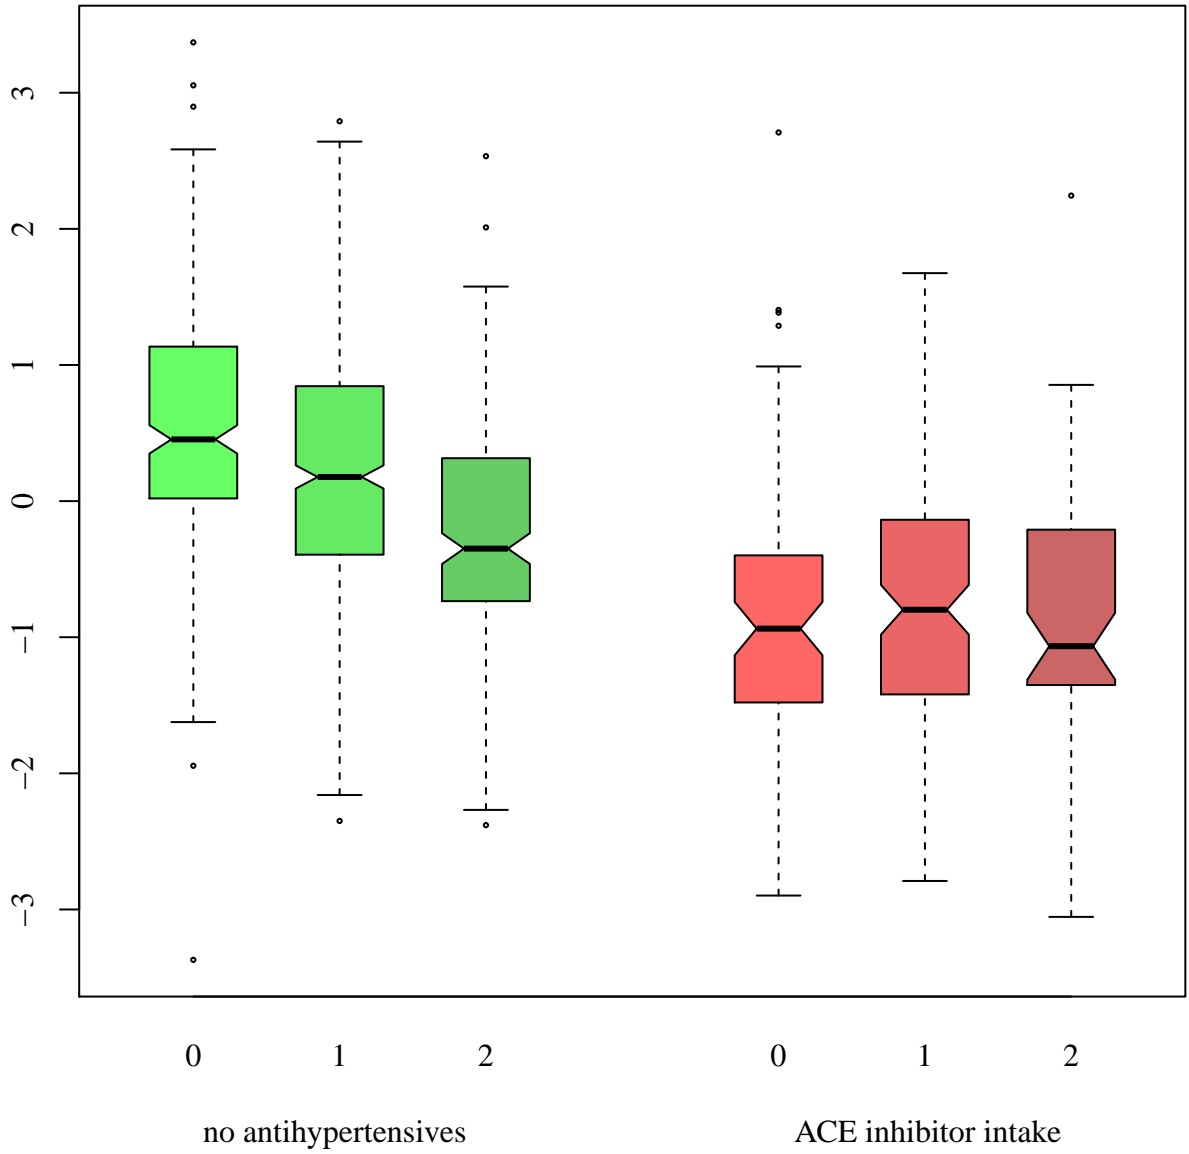

**X14205 – rs4334**

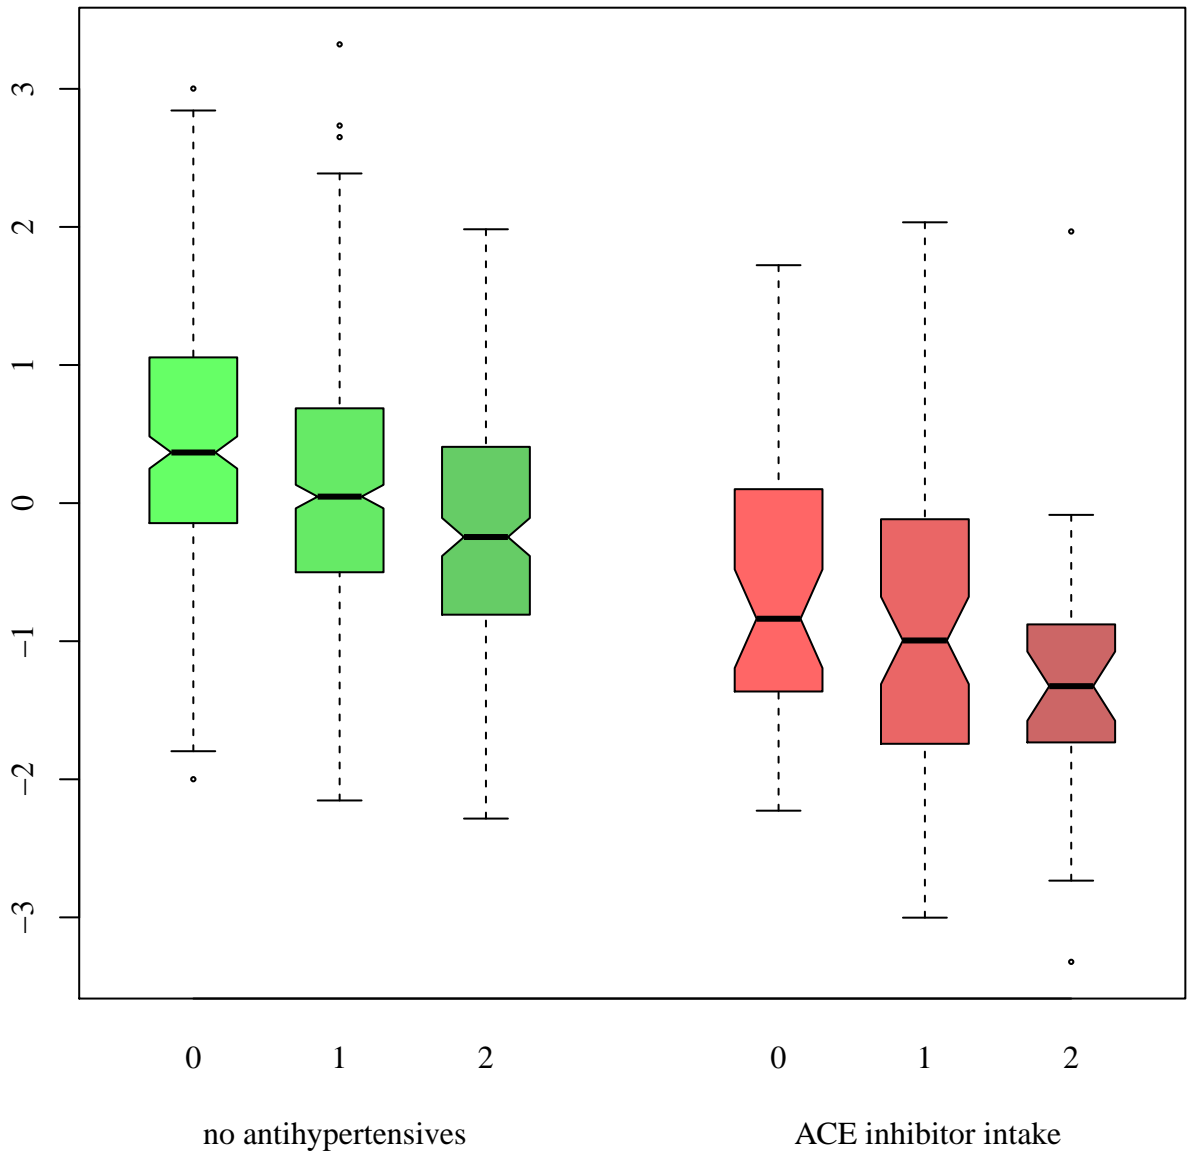

**X14208 – rs4334**

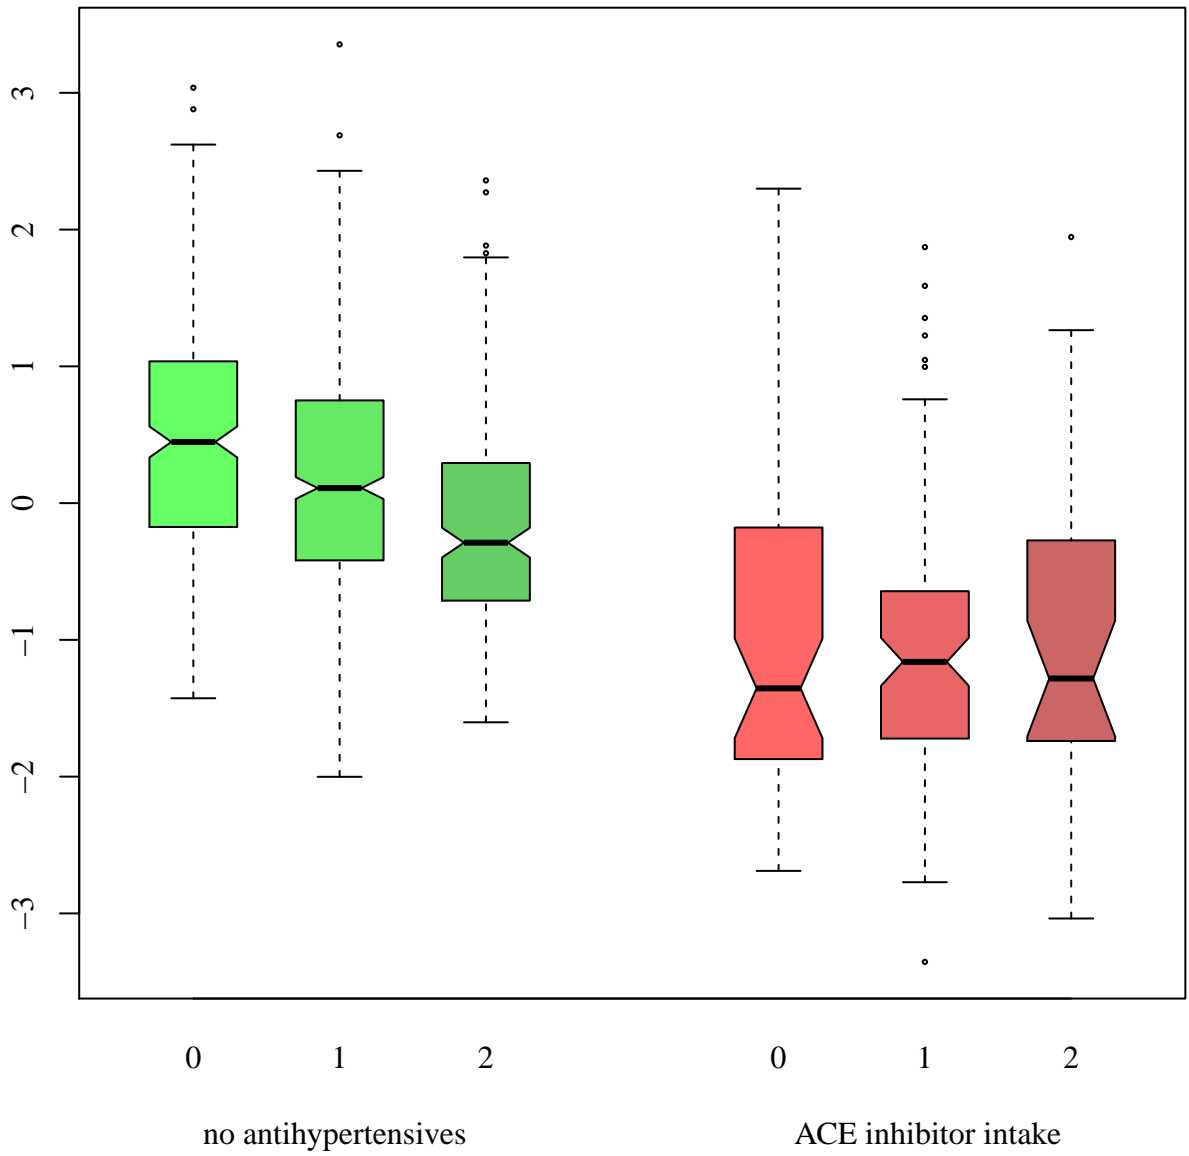

### X14304 – rs4334

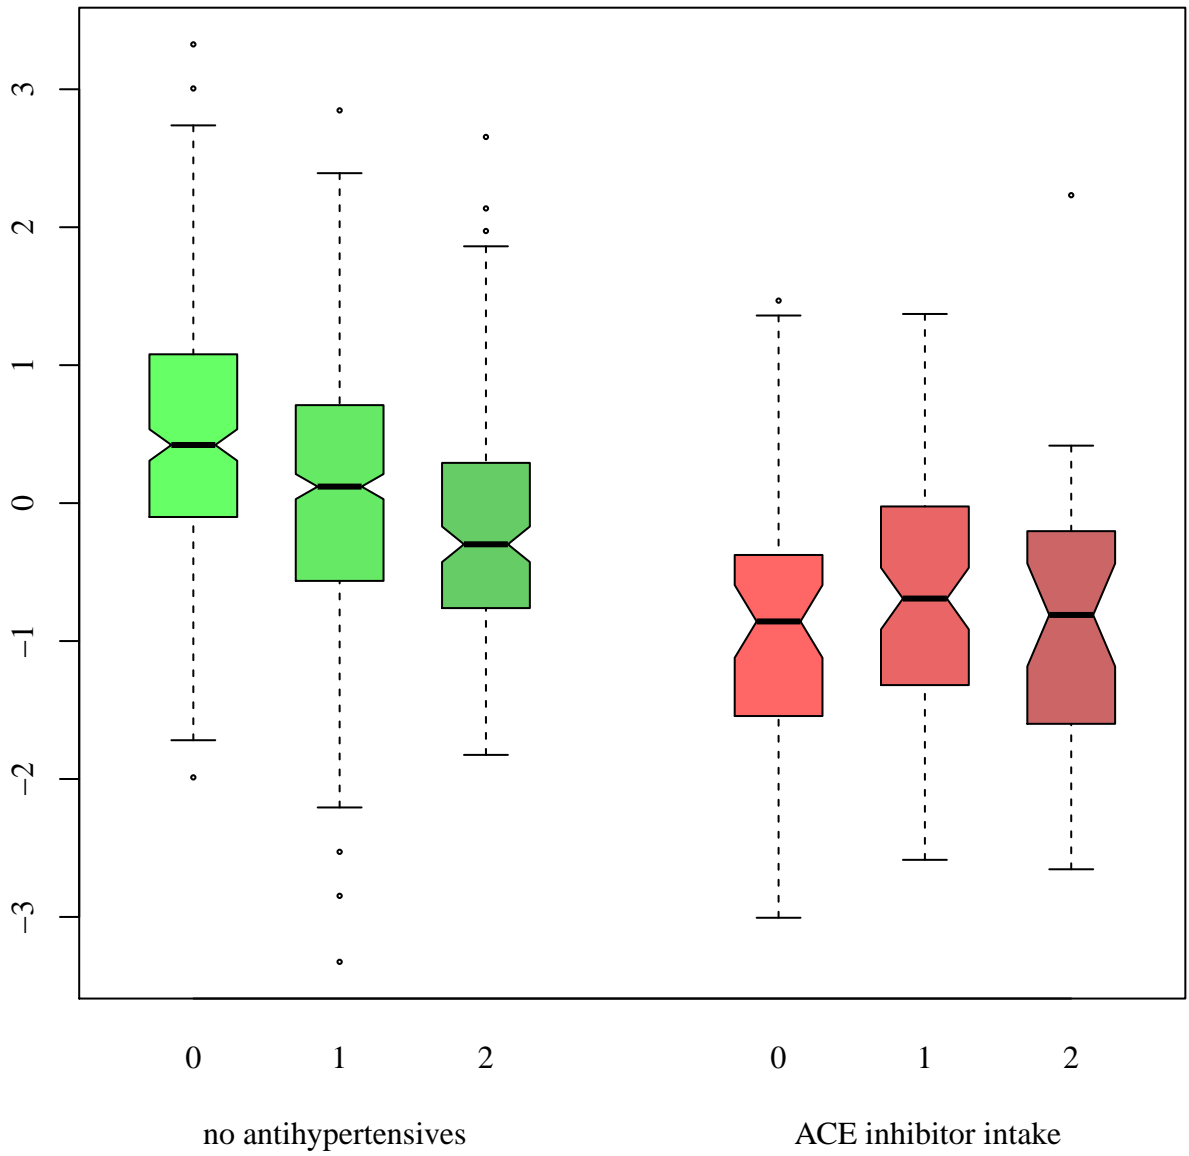

aspartylphenylalanine – rs4335

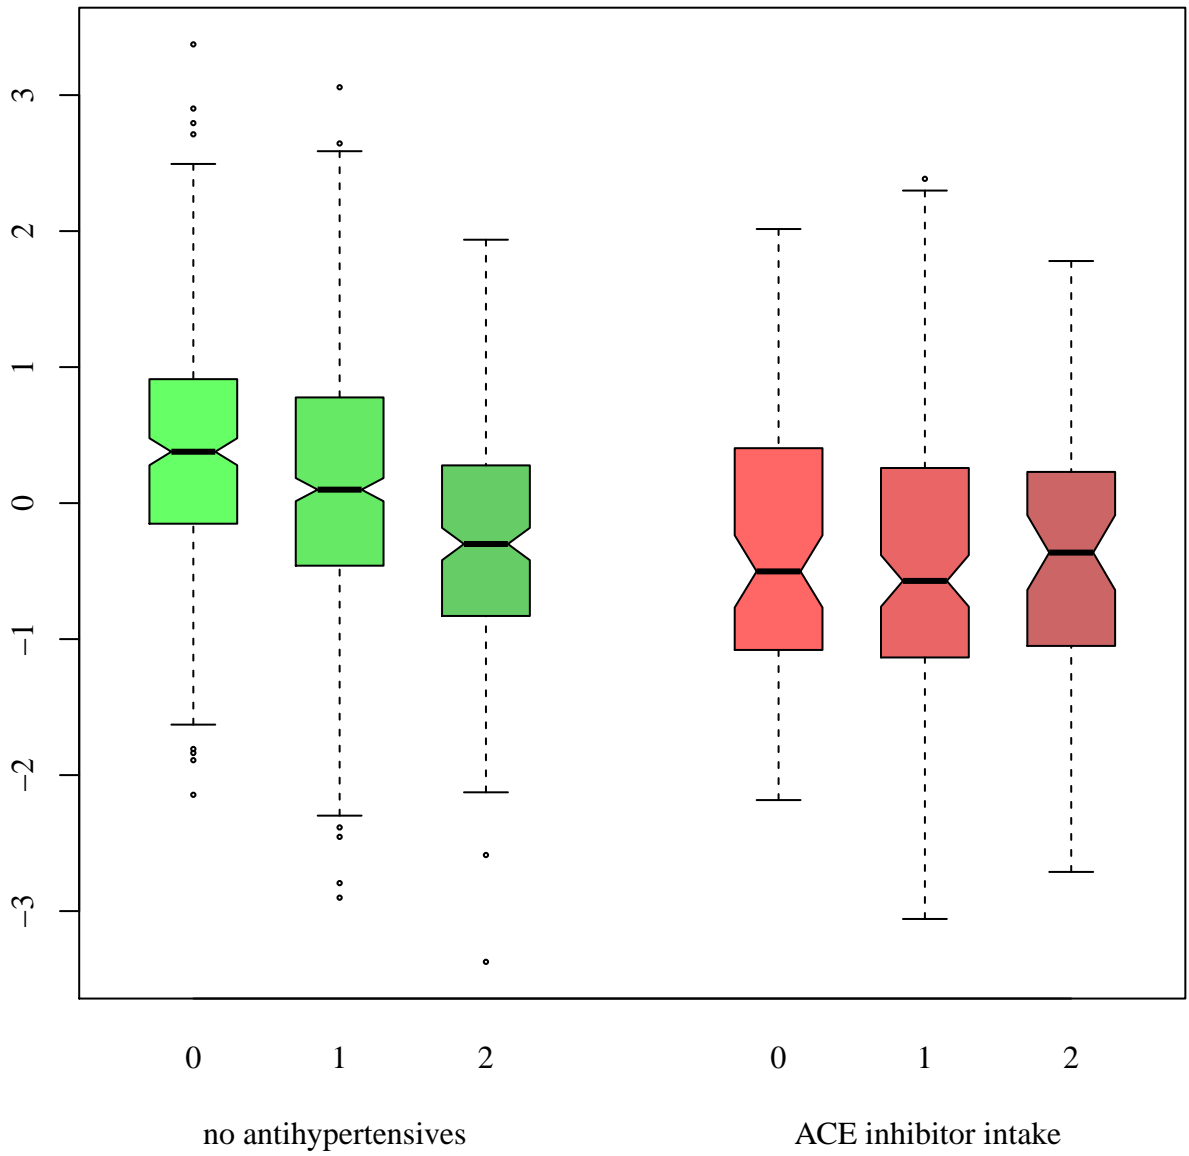

**aspartylphenylalanine/HWESASXX – rs4335**

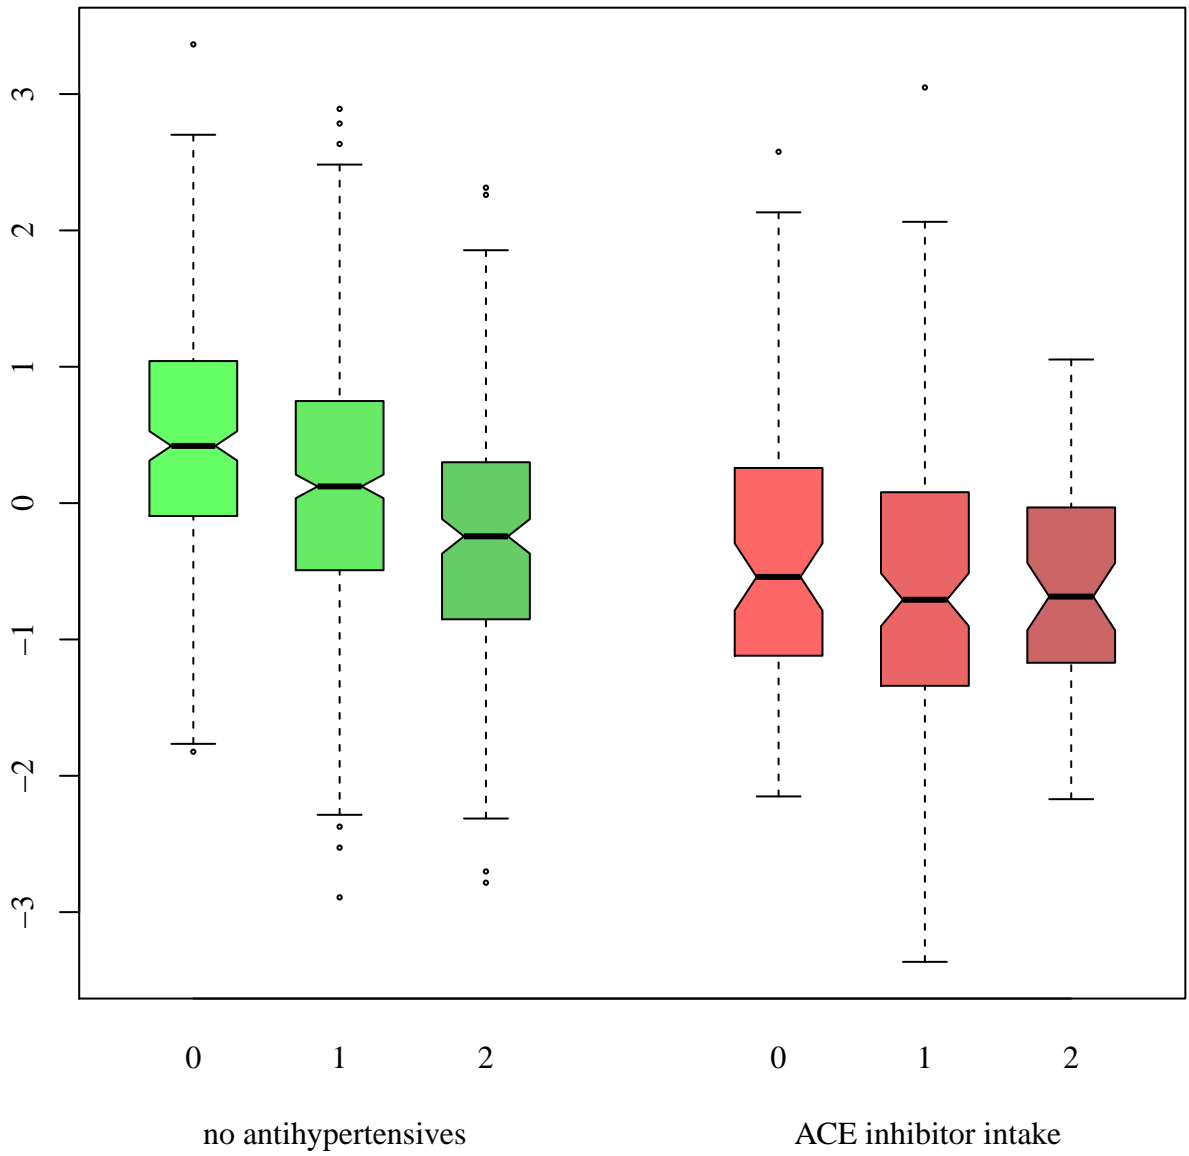

aspartylphenylalanine/X11805 – rs4335

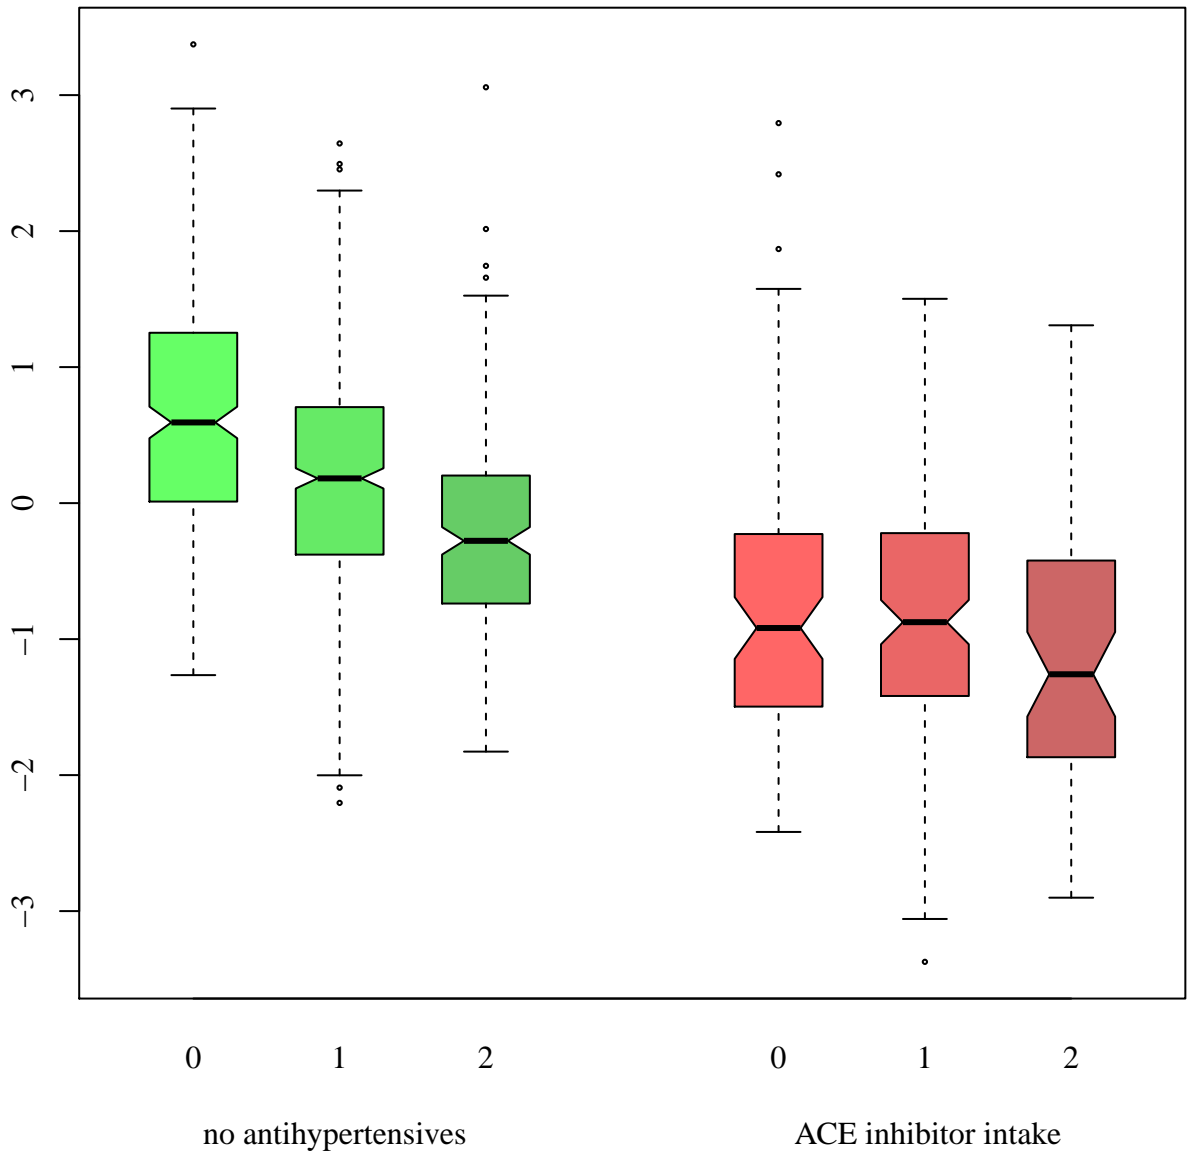

aspartylphenylalanine/X14450 – rs4335

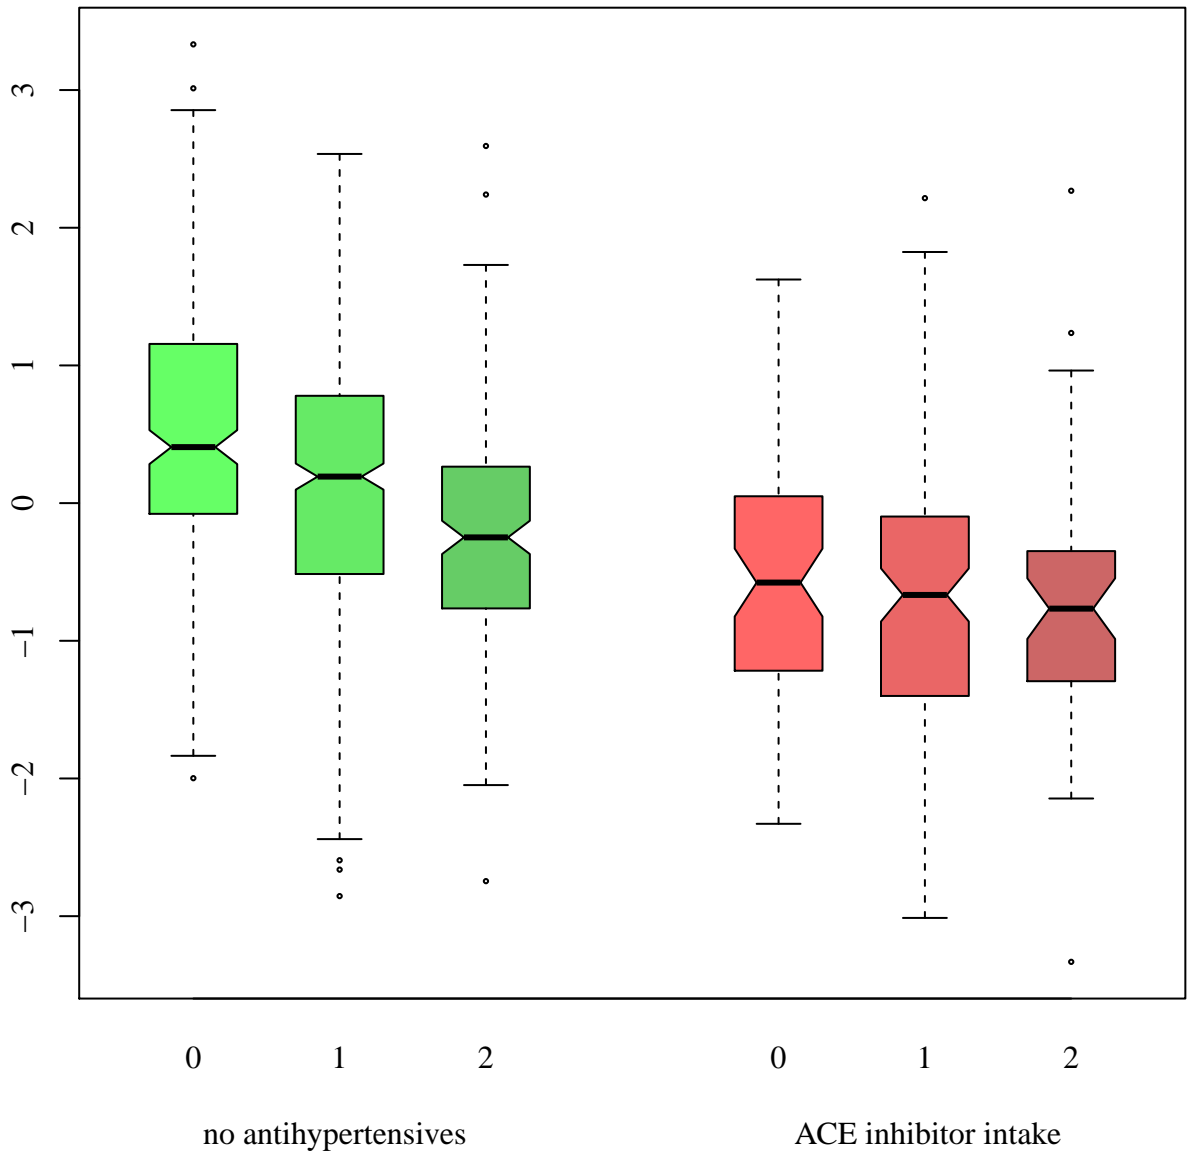



**X14086 – rs4335**

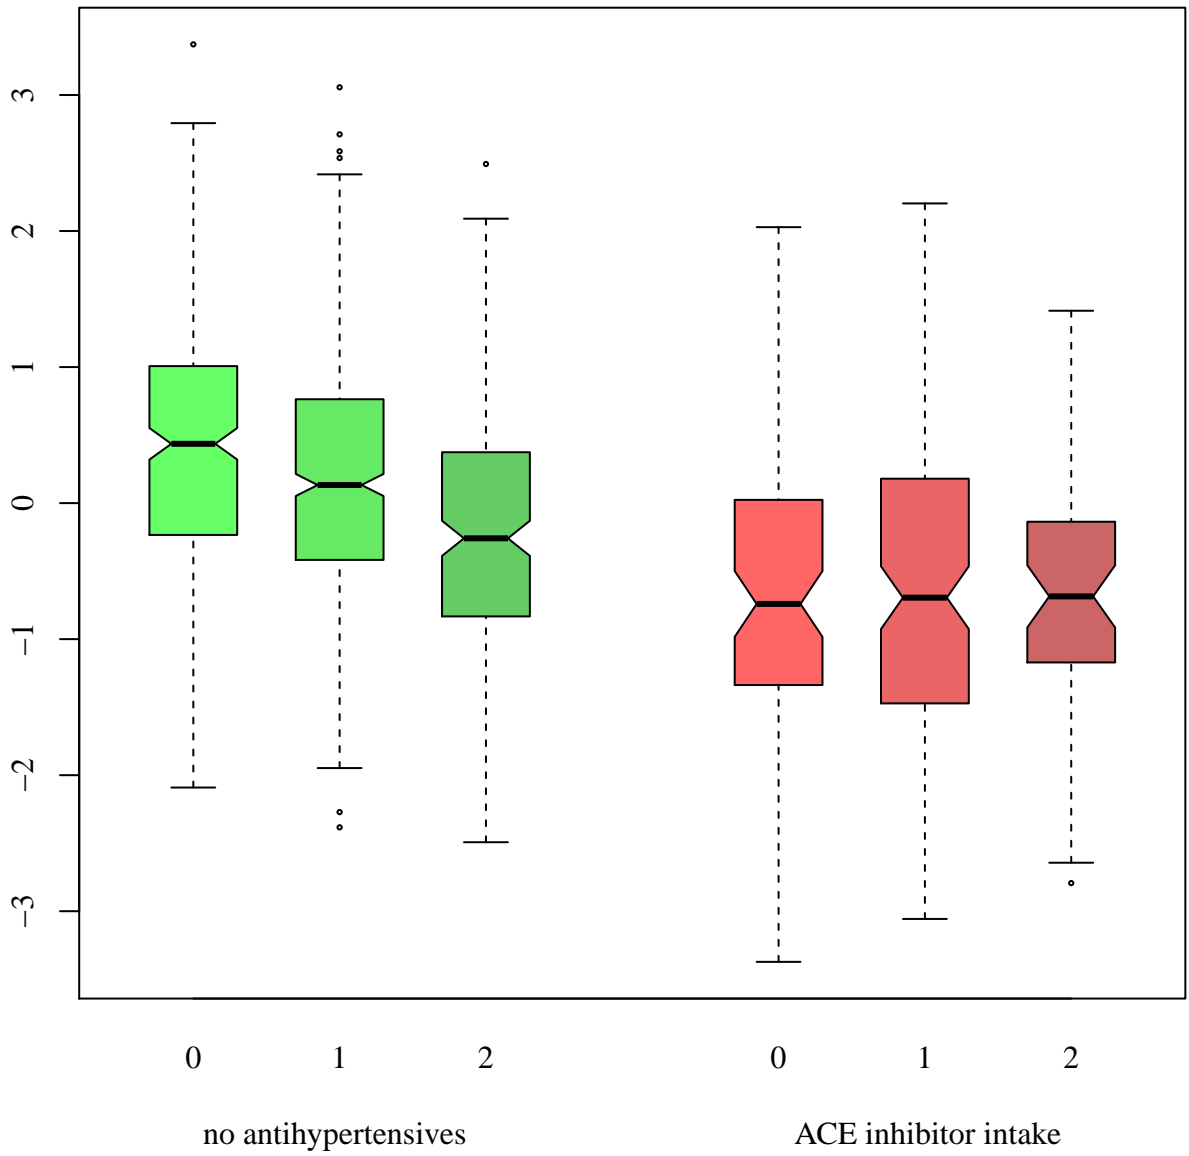

**X14189 – rs4335**

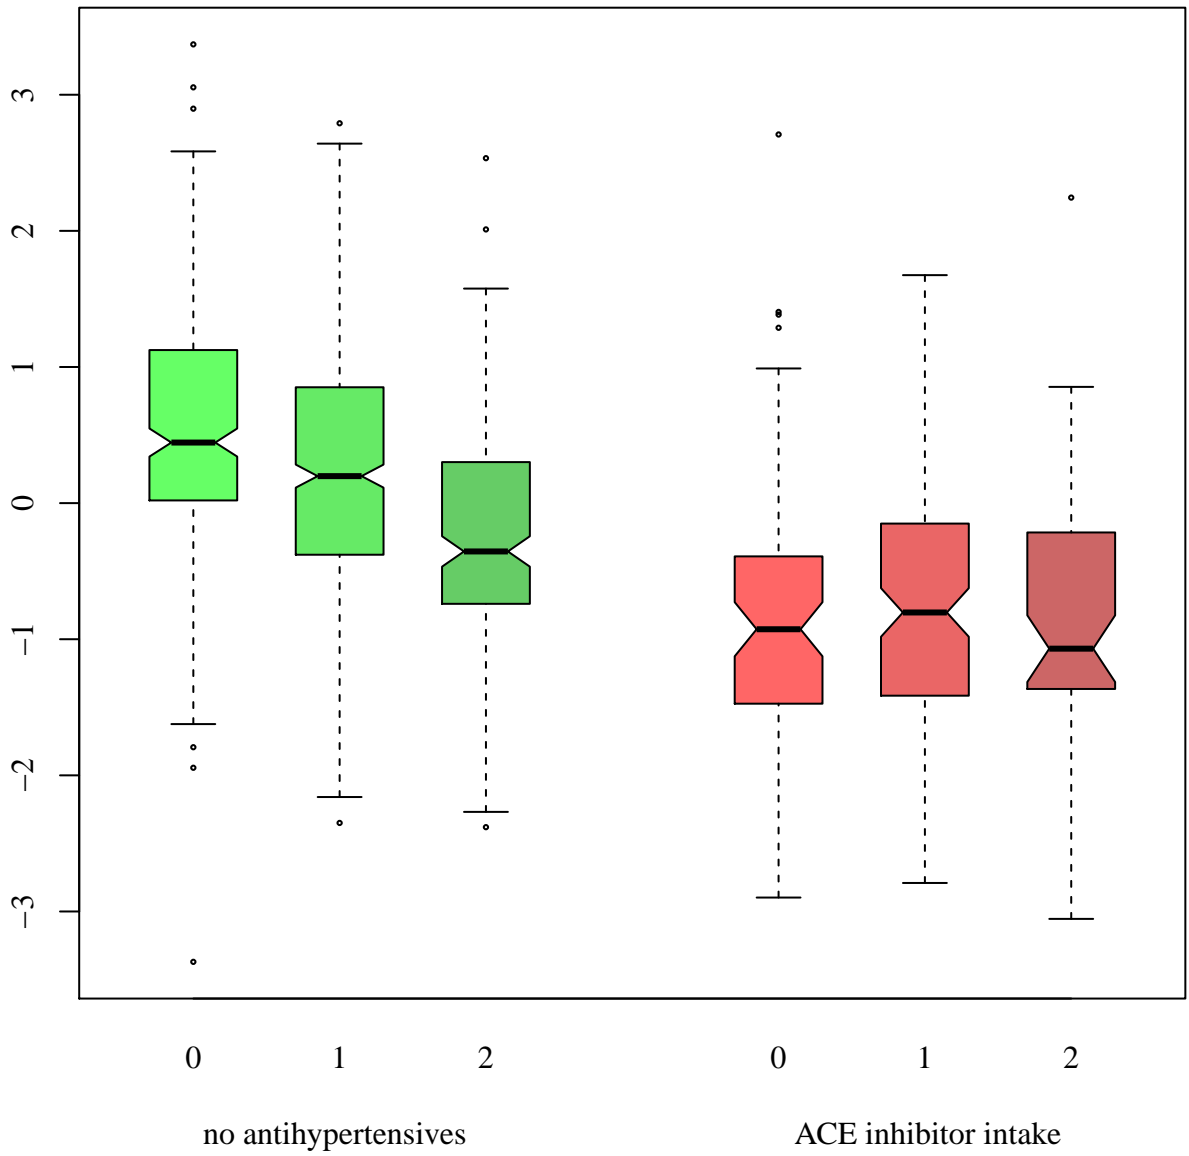

**X14205 – rs4335**

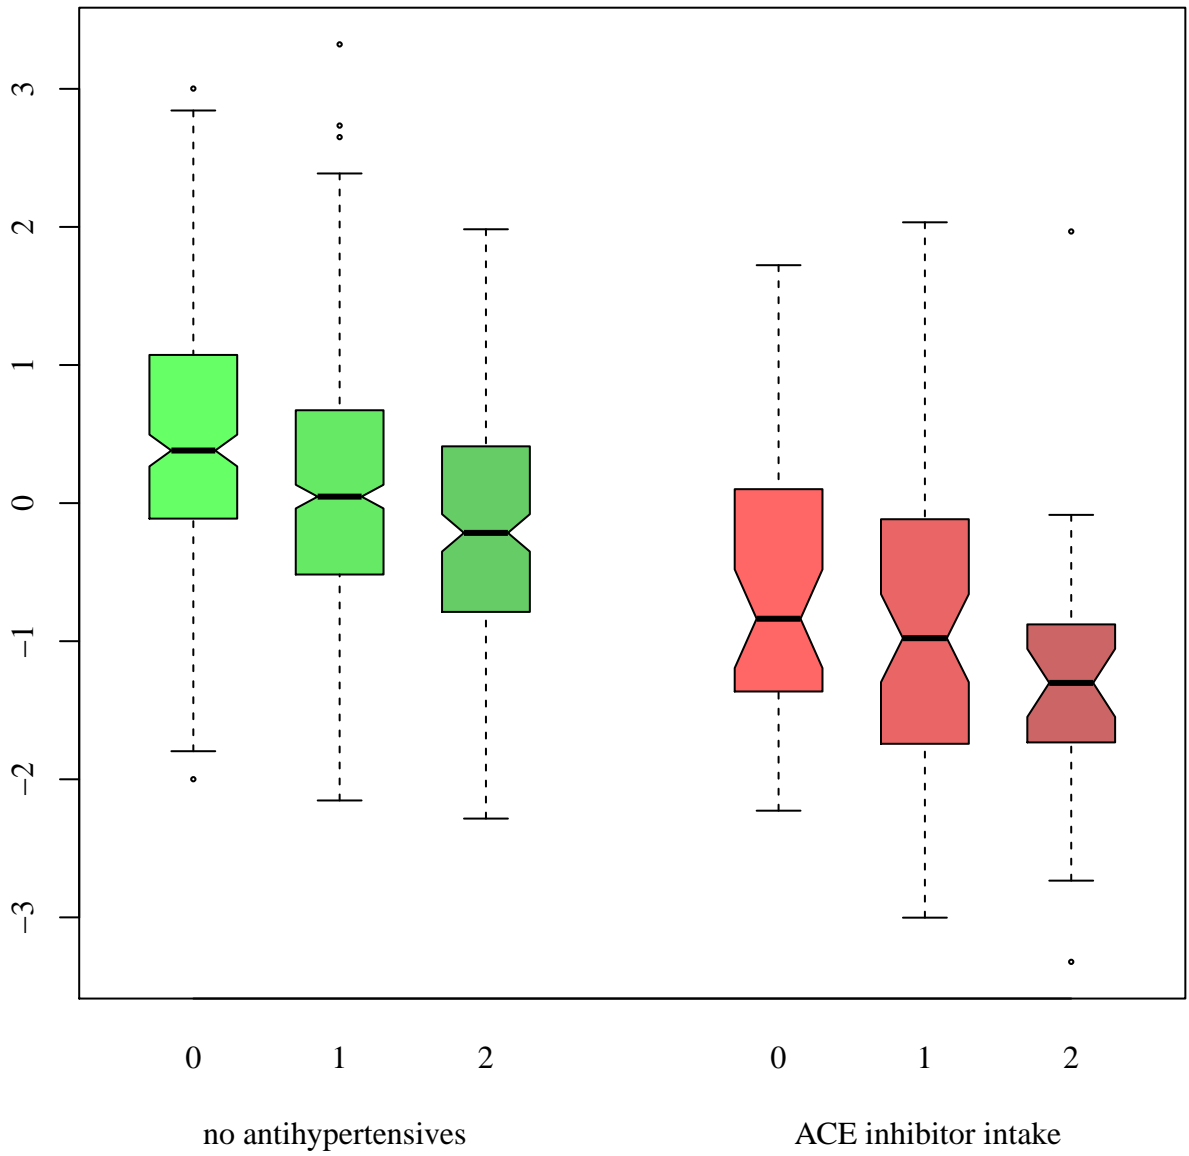

**X14208 – rs4335**

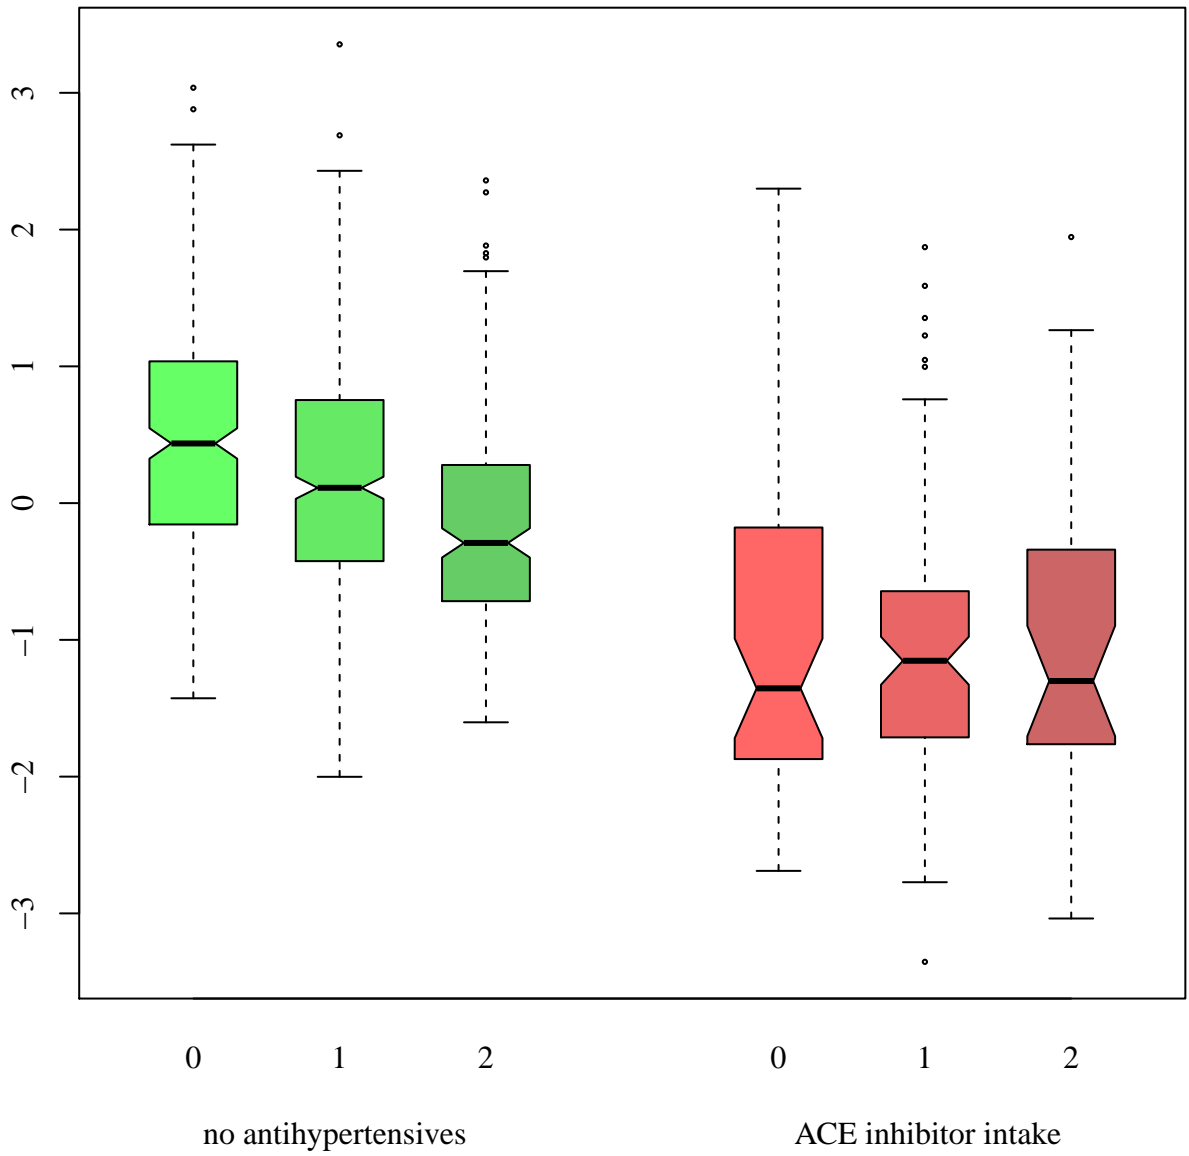

**X14304 – rs4335**

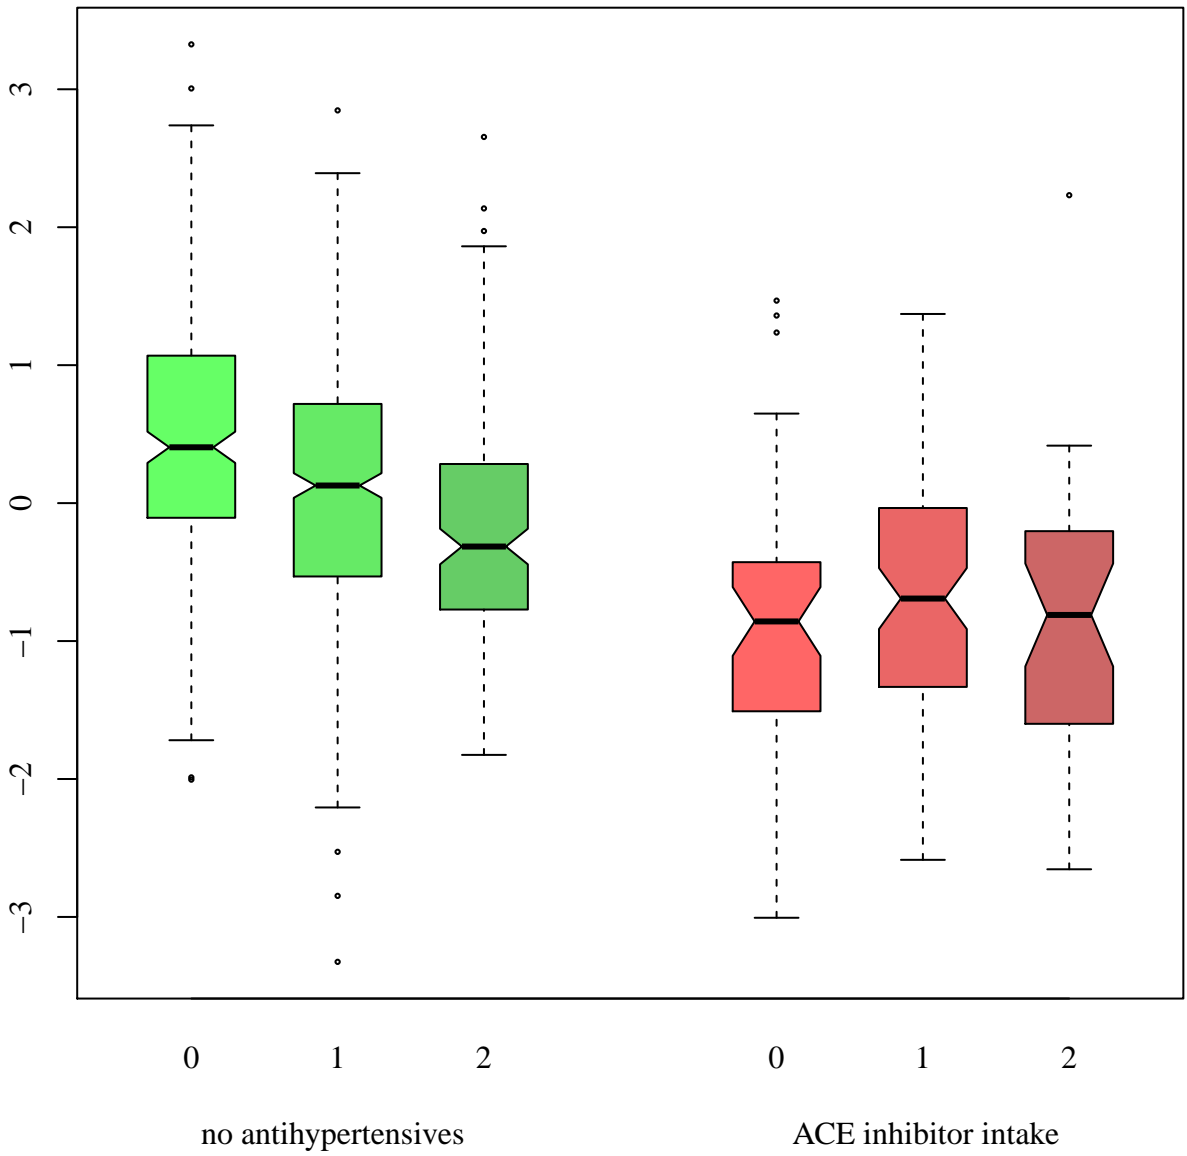

**aspartylphenylalanine – rs4336**

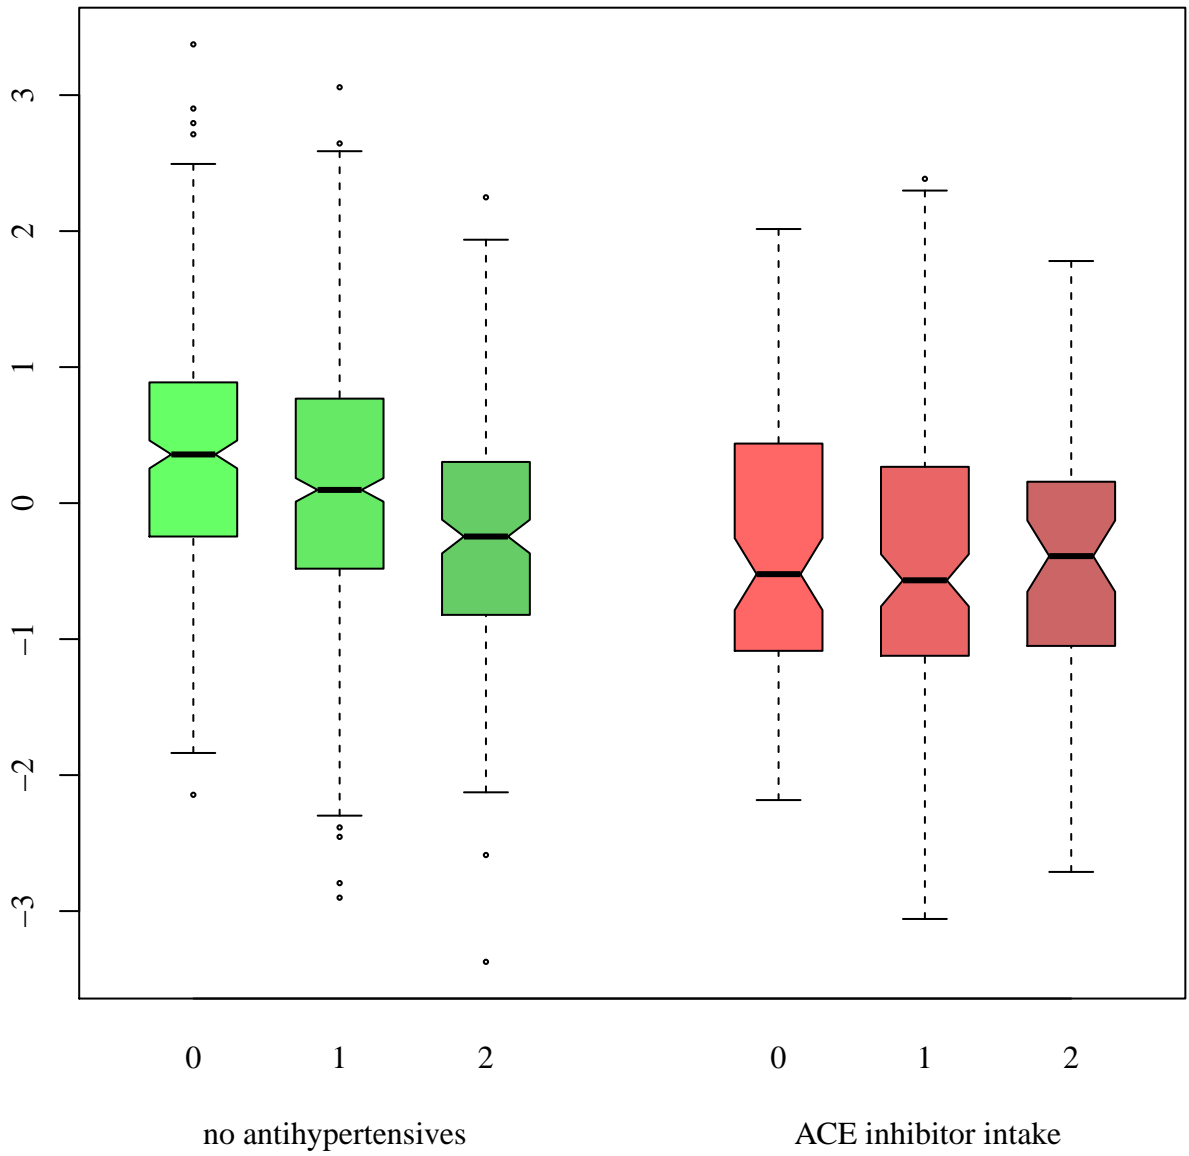

**aspartylphenylalanine/HWESASXX – rs4336**

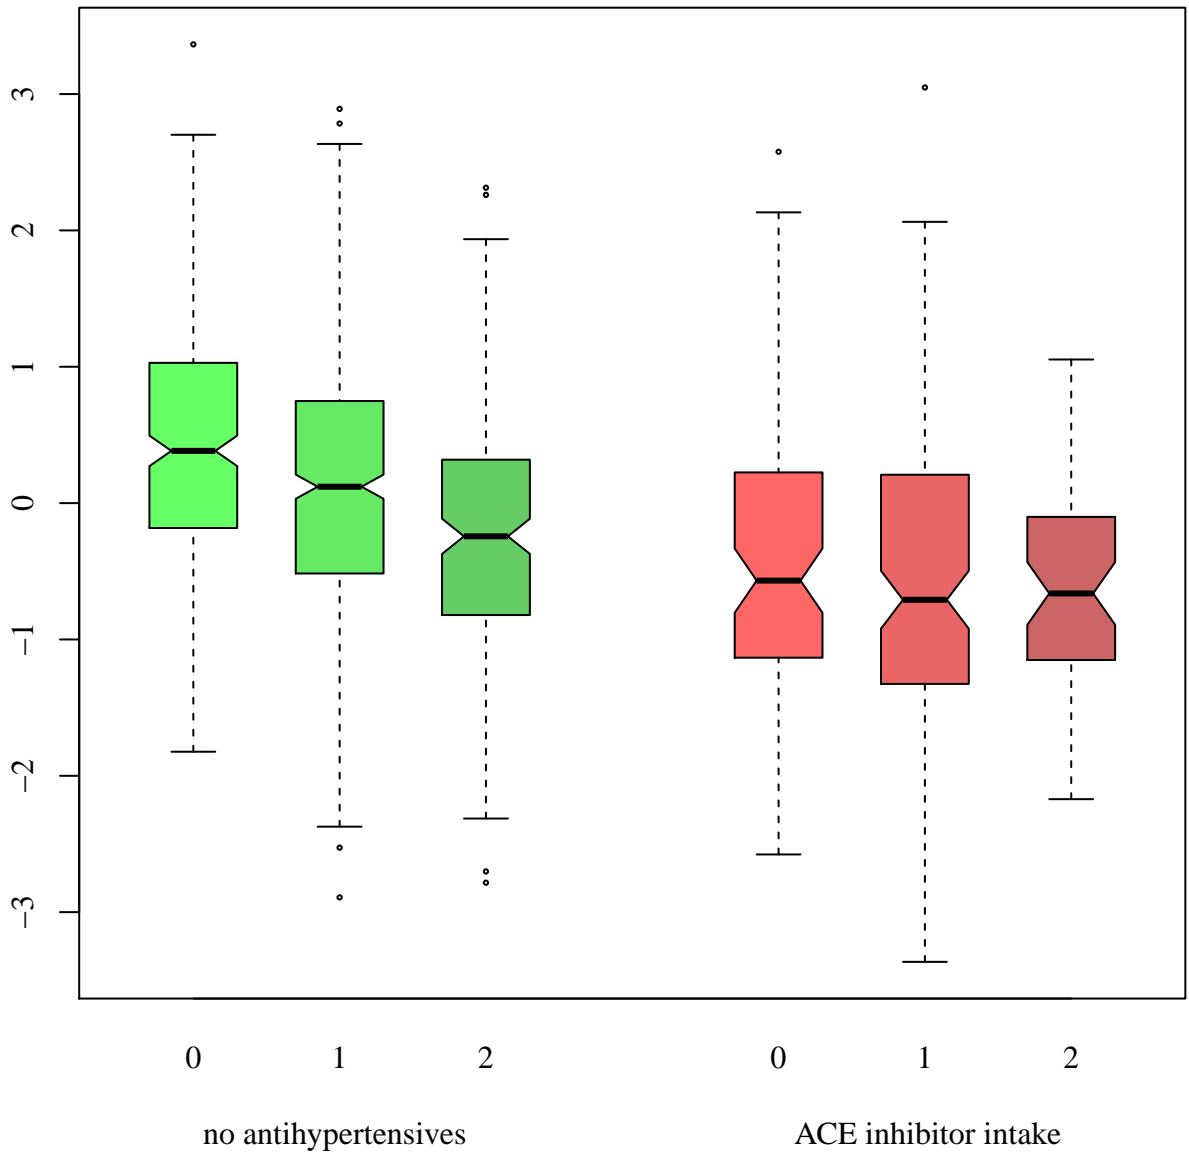

**aspartylphenylalanine/X11805 – rs4336**

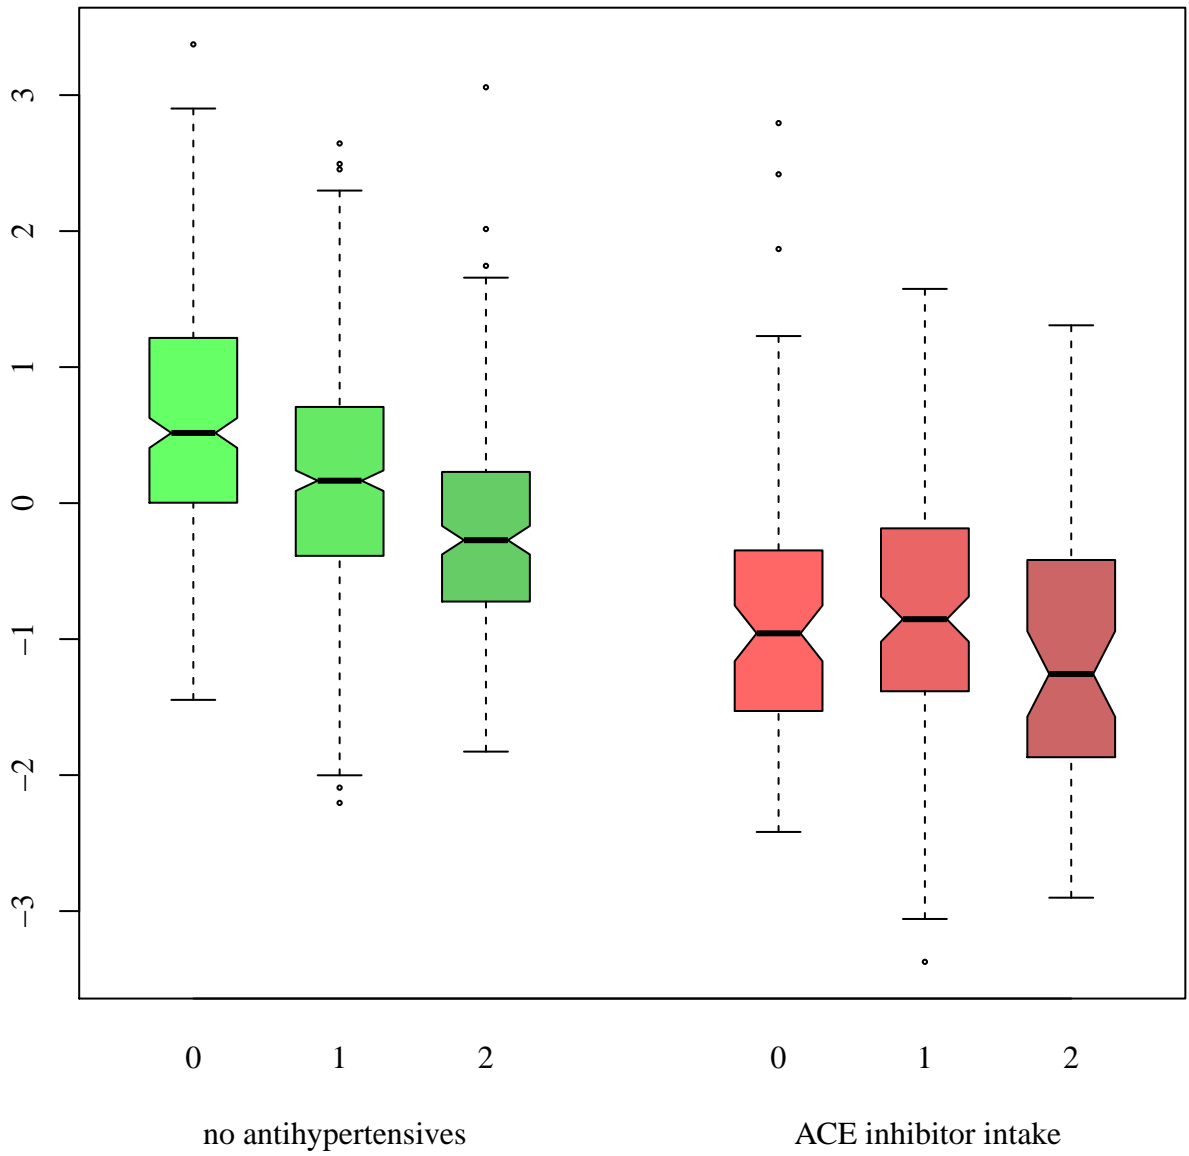



**aspartylphenylalanine/X14450 – rs4336**

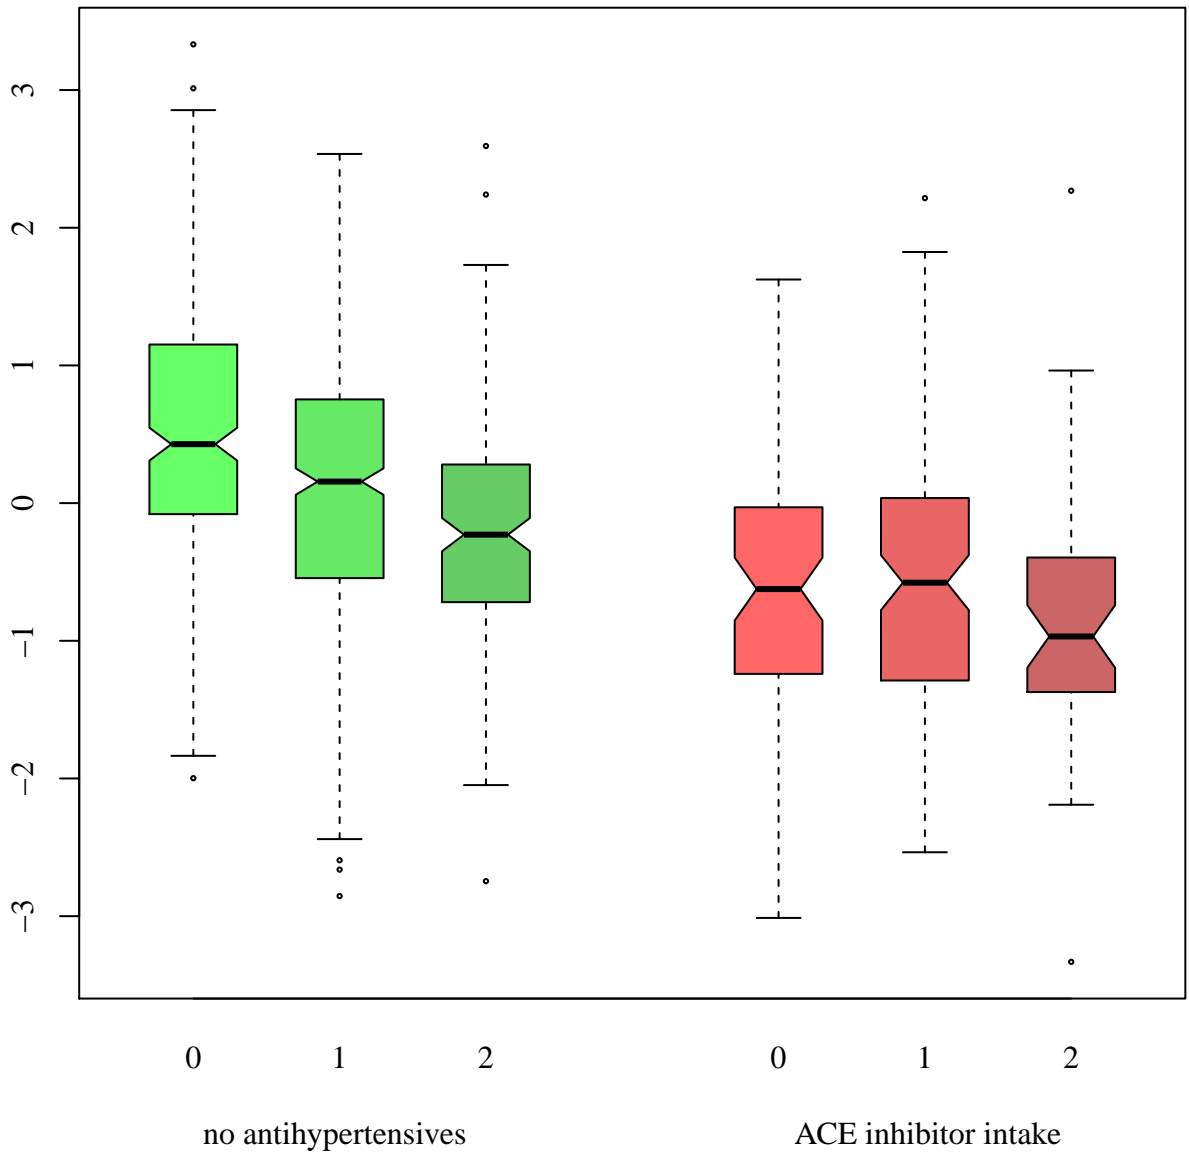

**X14086 – rs4336**

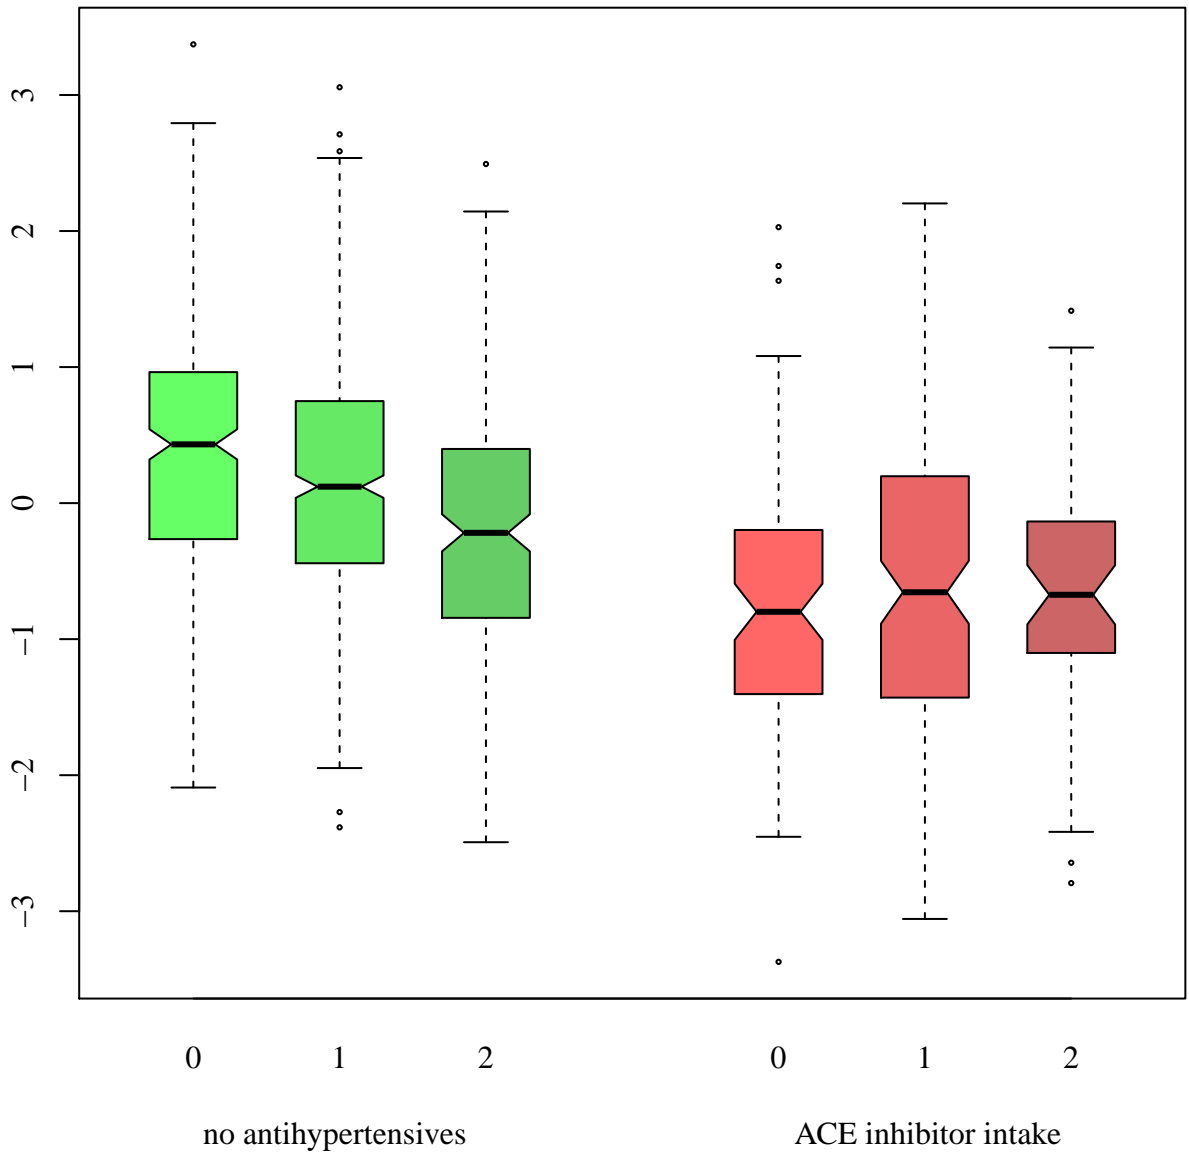

**X14189 – rs4336**

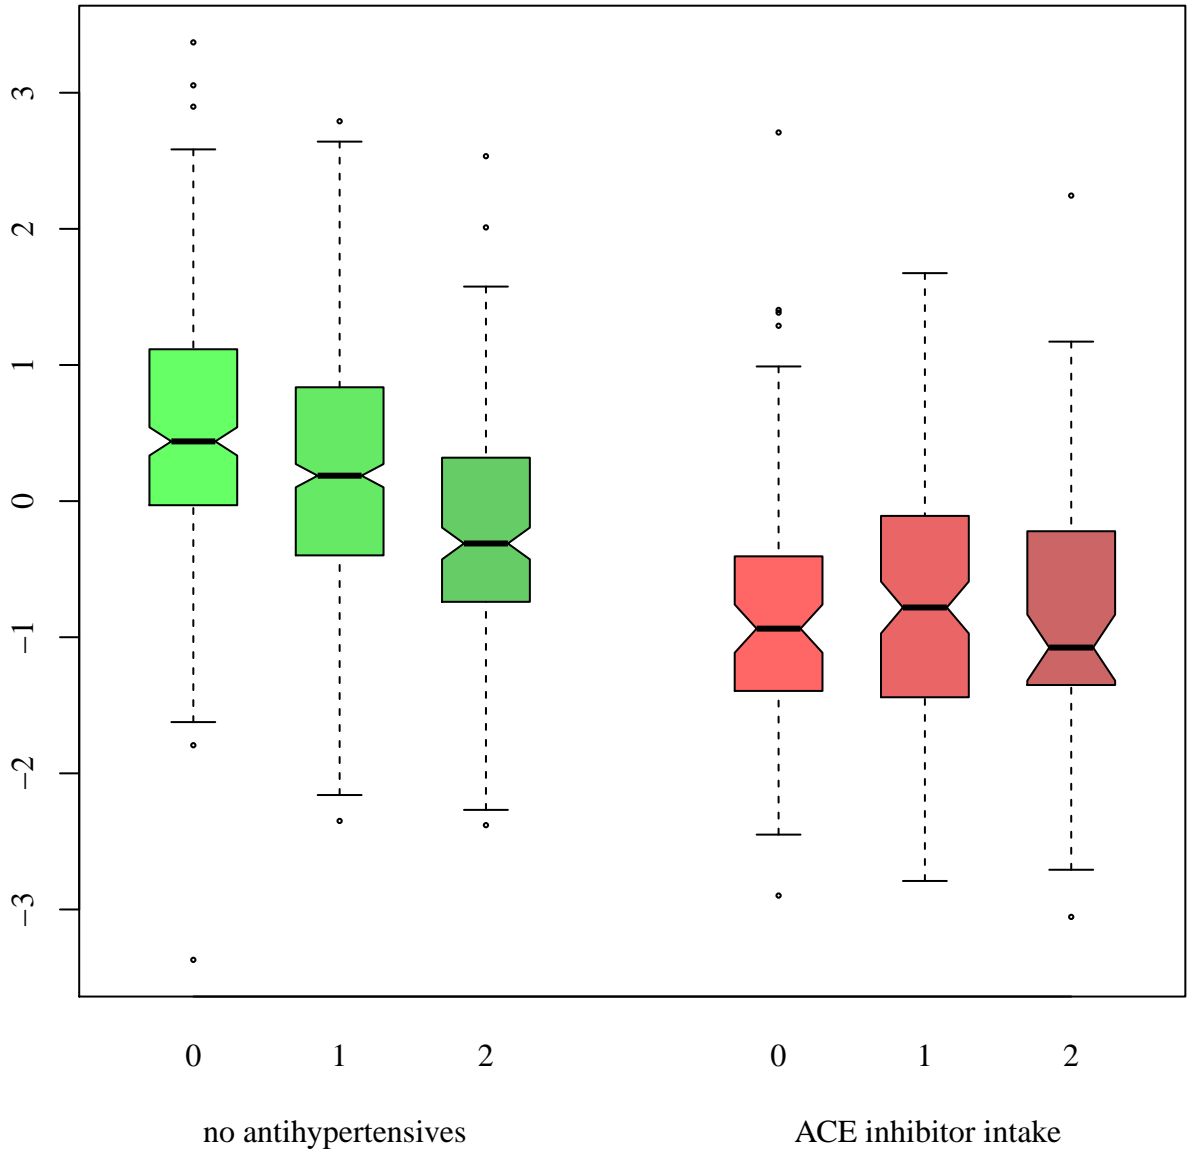

**X14205 – rs4336**

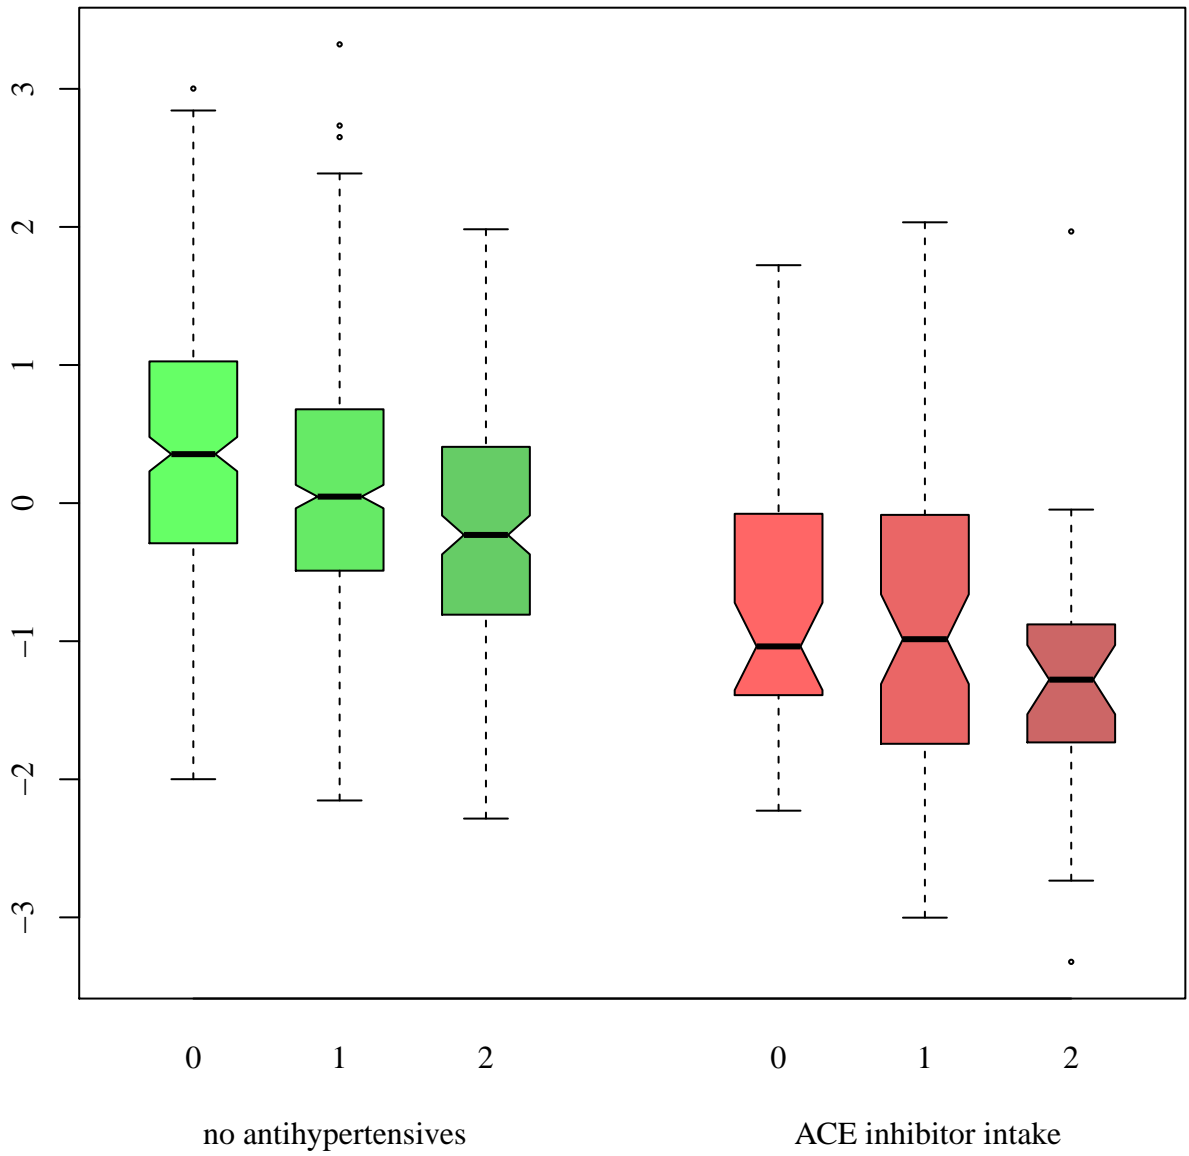

**X14208 – rs4336**

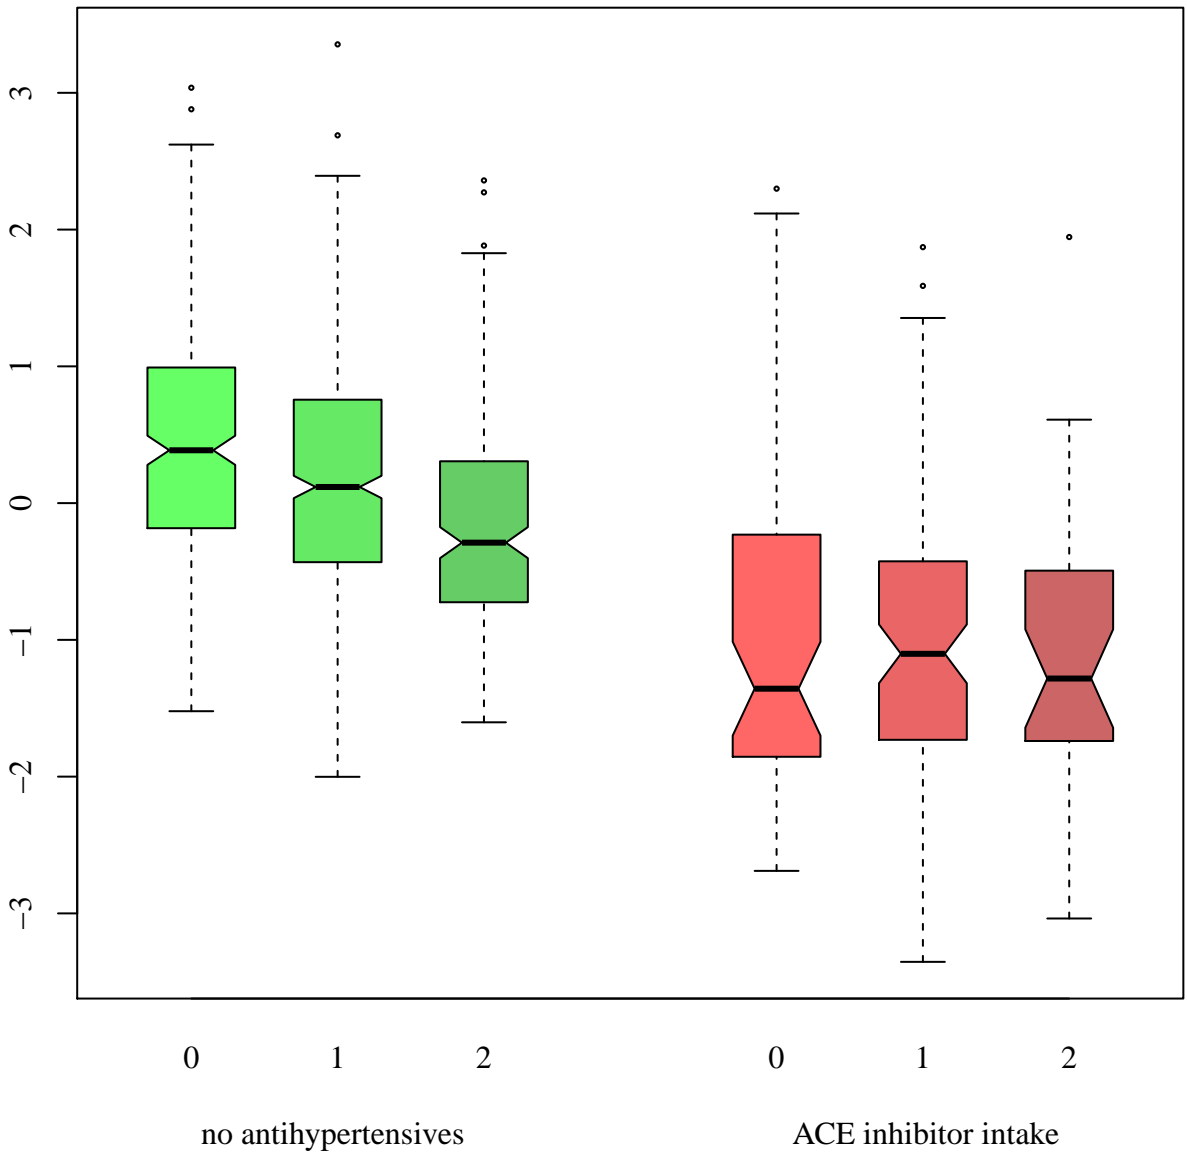

**X14304 – rs4336**

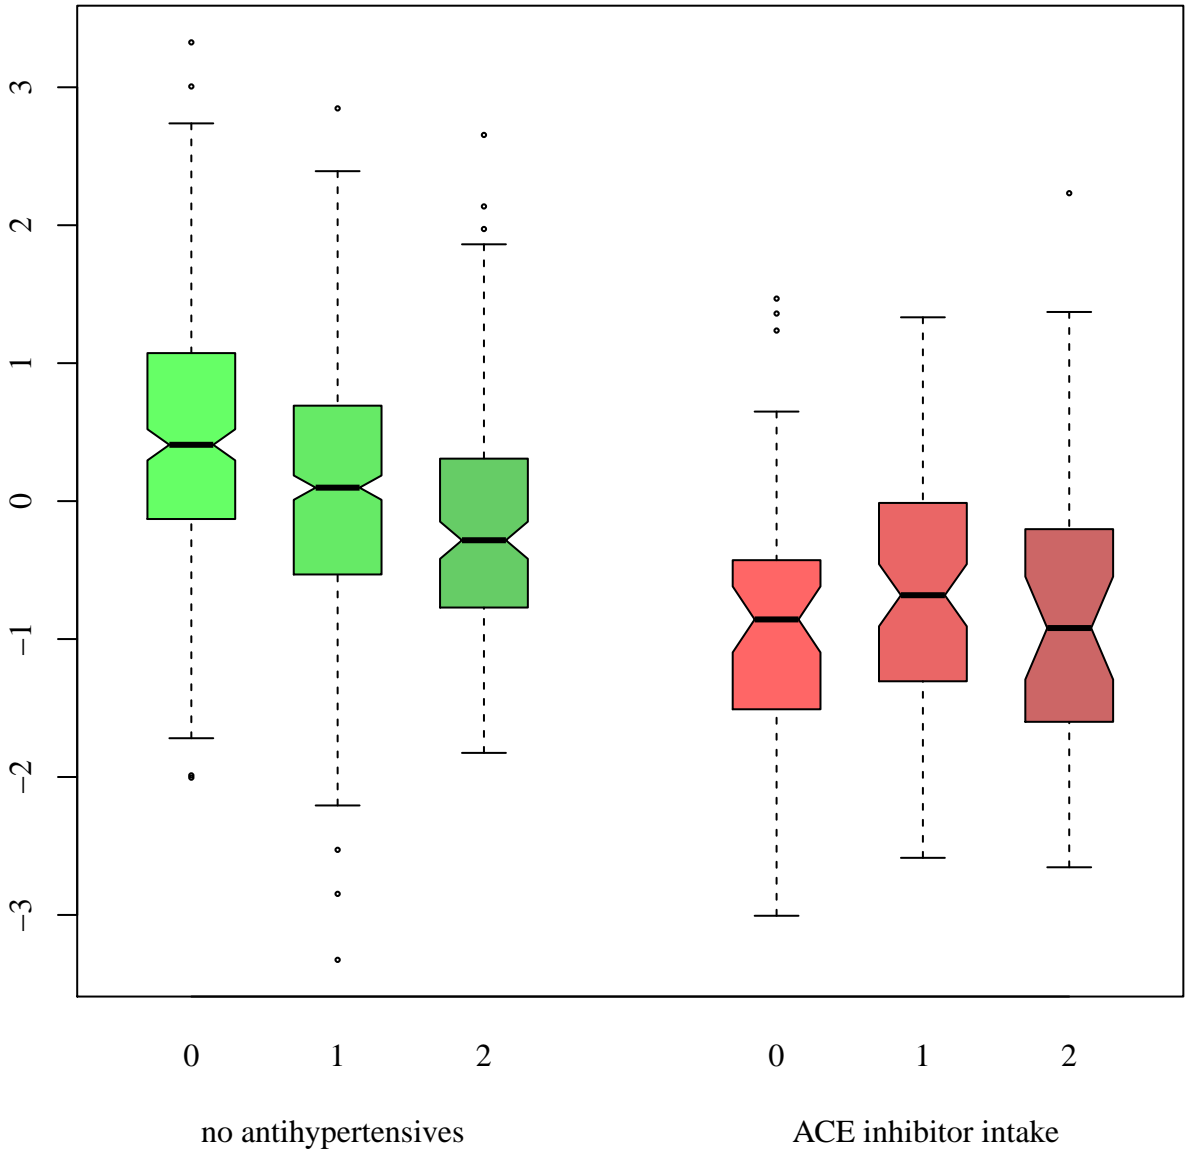

aspartylphenylalanine – rs4337

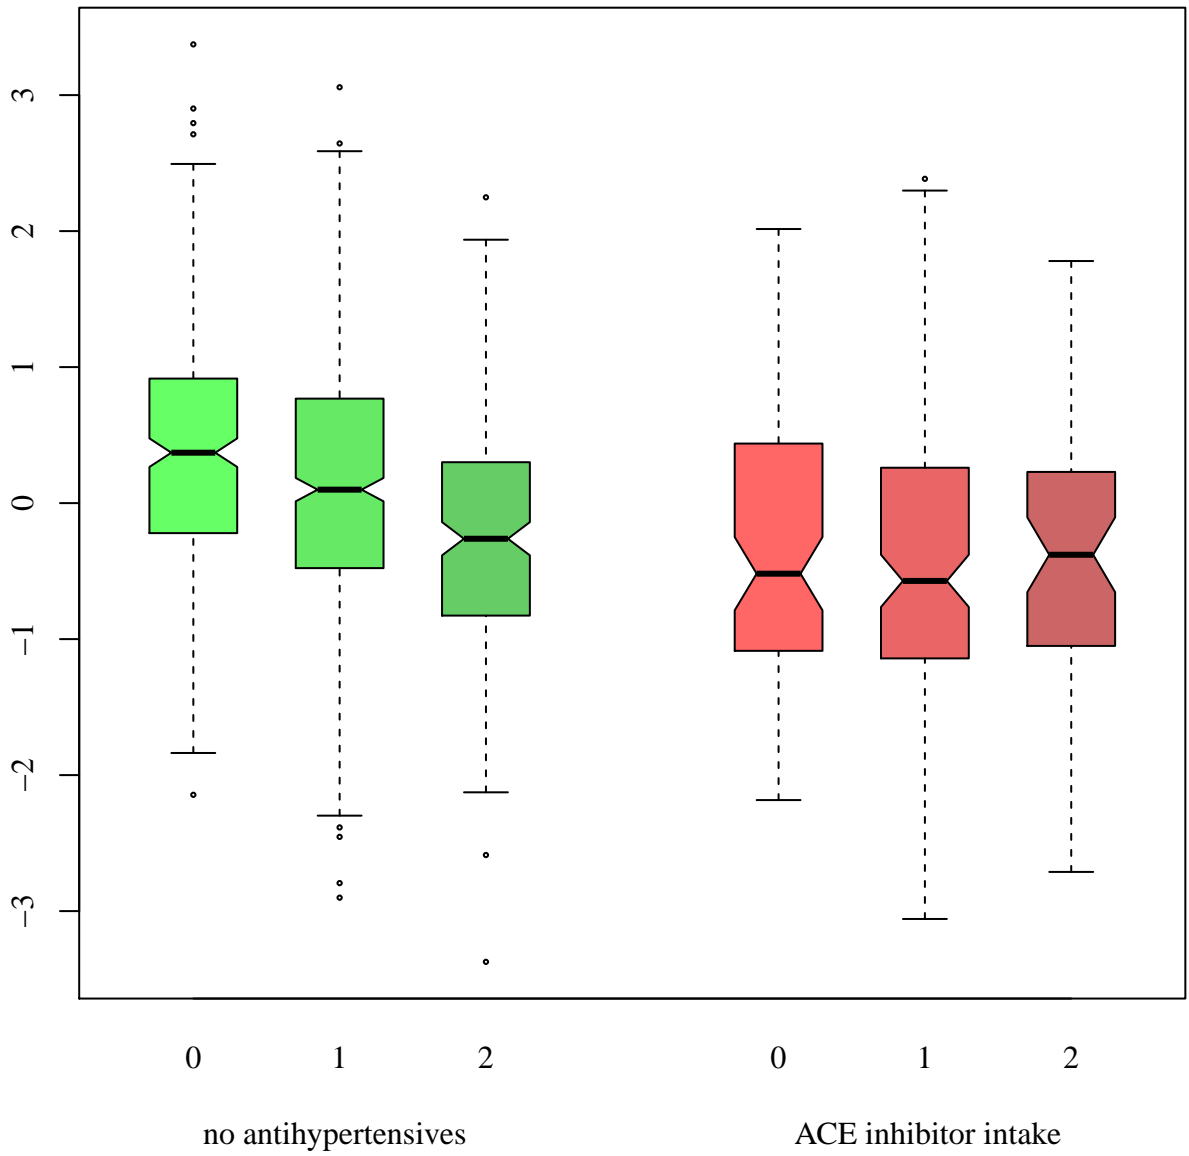

**aspartylphenylalanine/HWESASXX – rs4337**

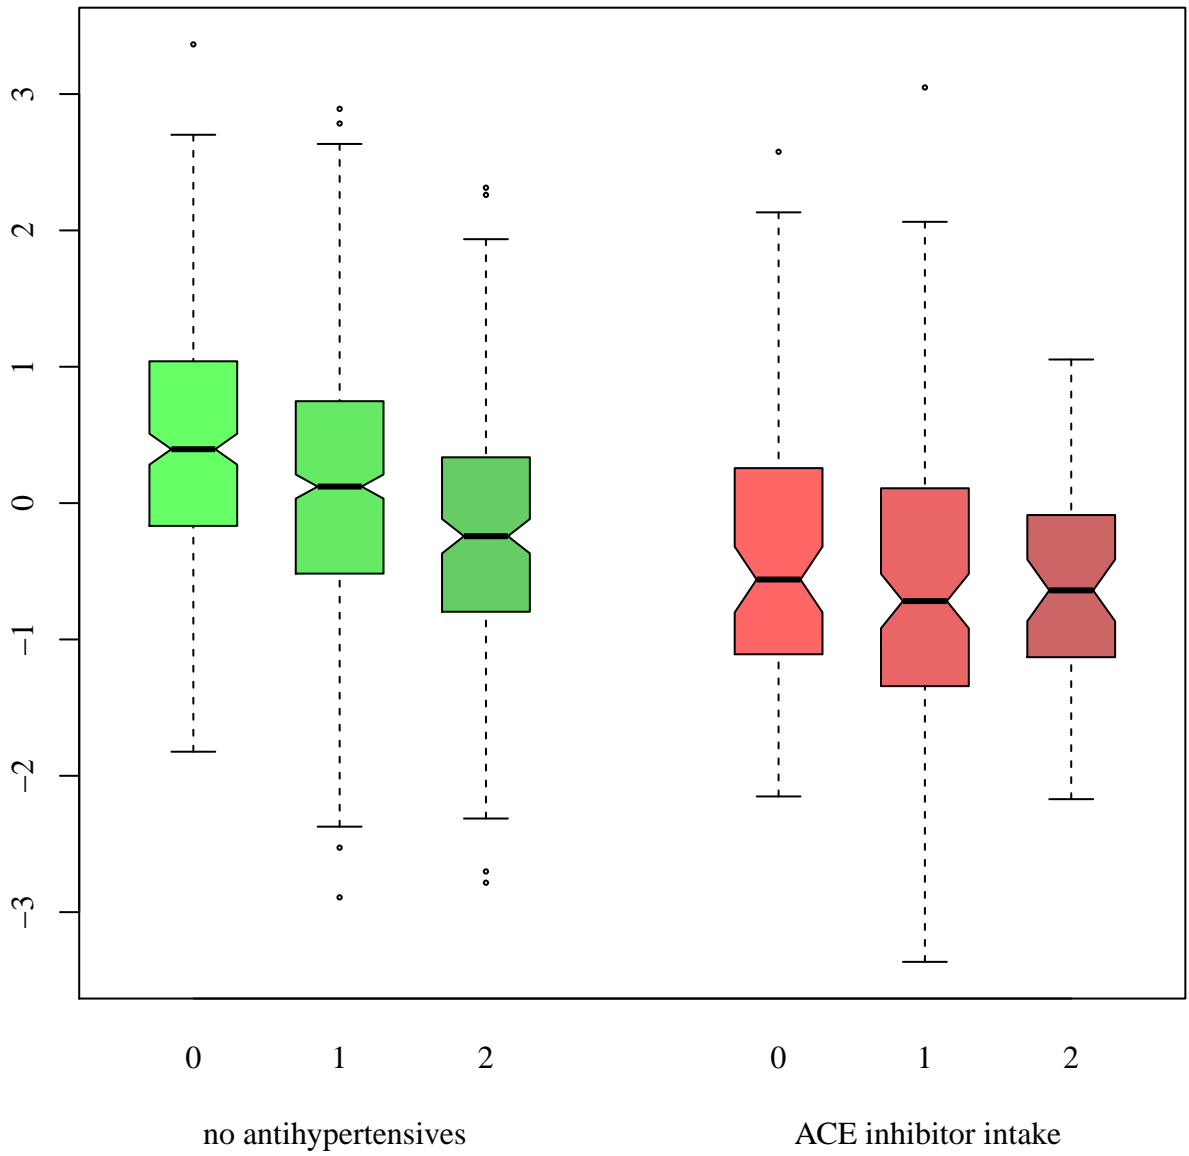



aspartylphenylalanine/X11805 – rs4337

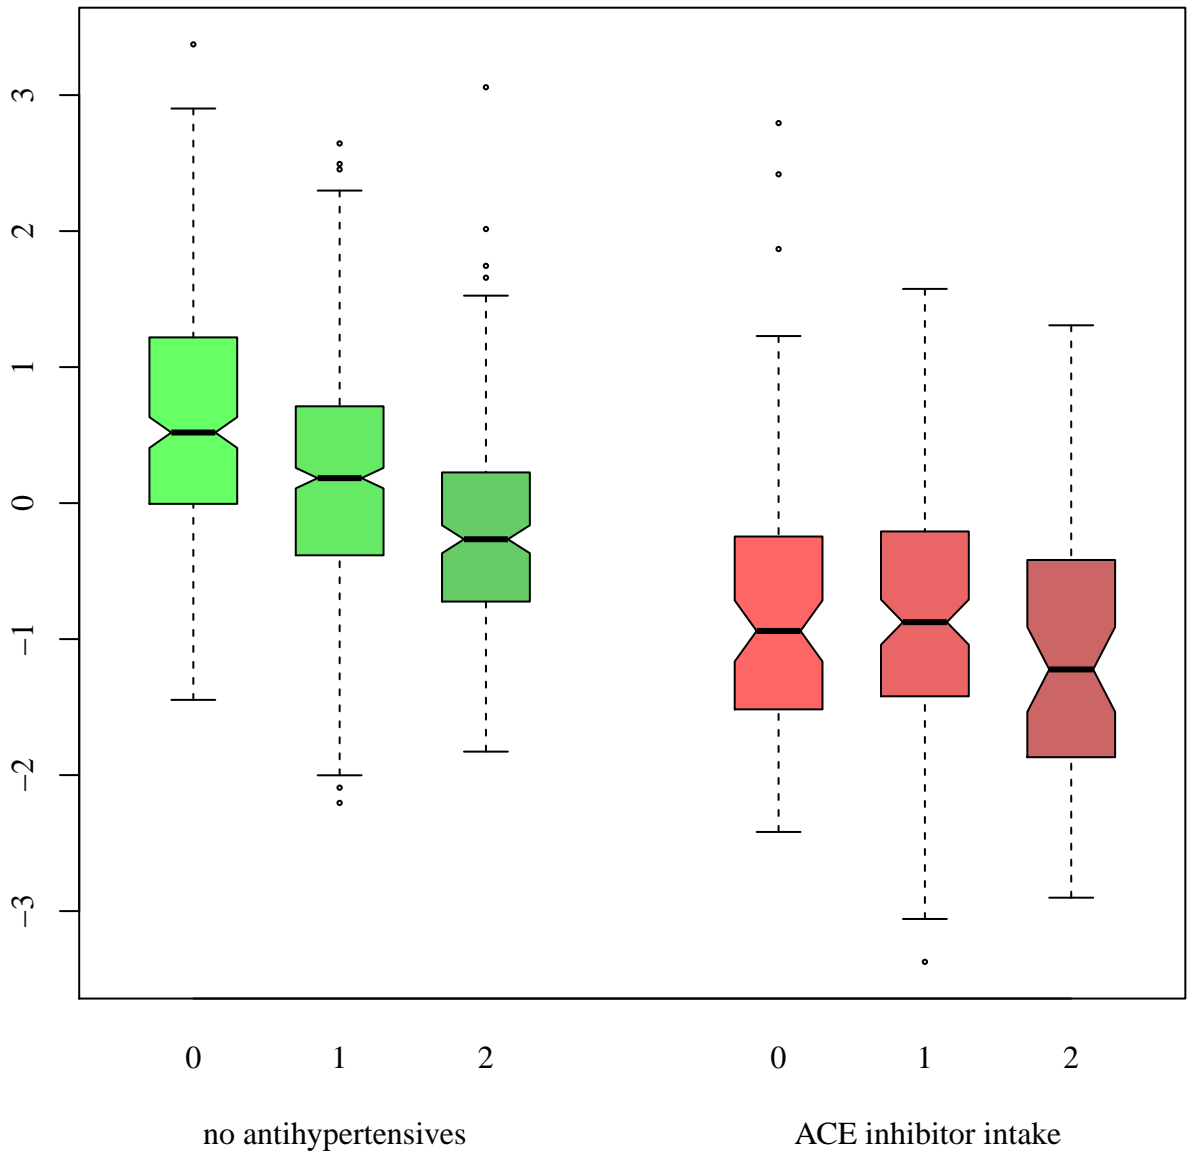

aspartylphenylalanine/X14450 – rs4337

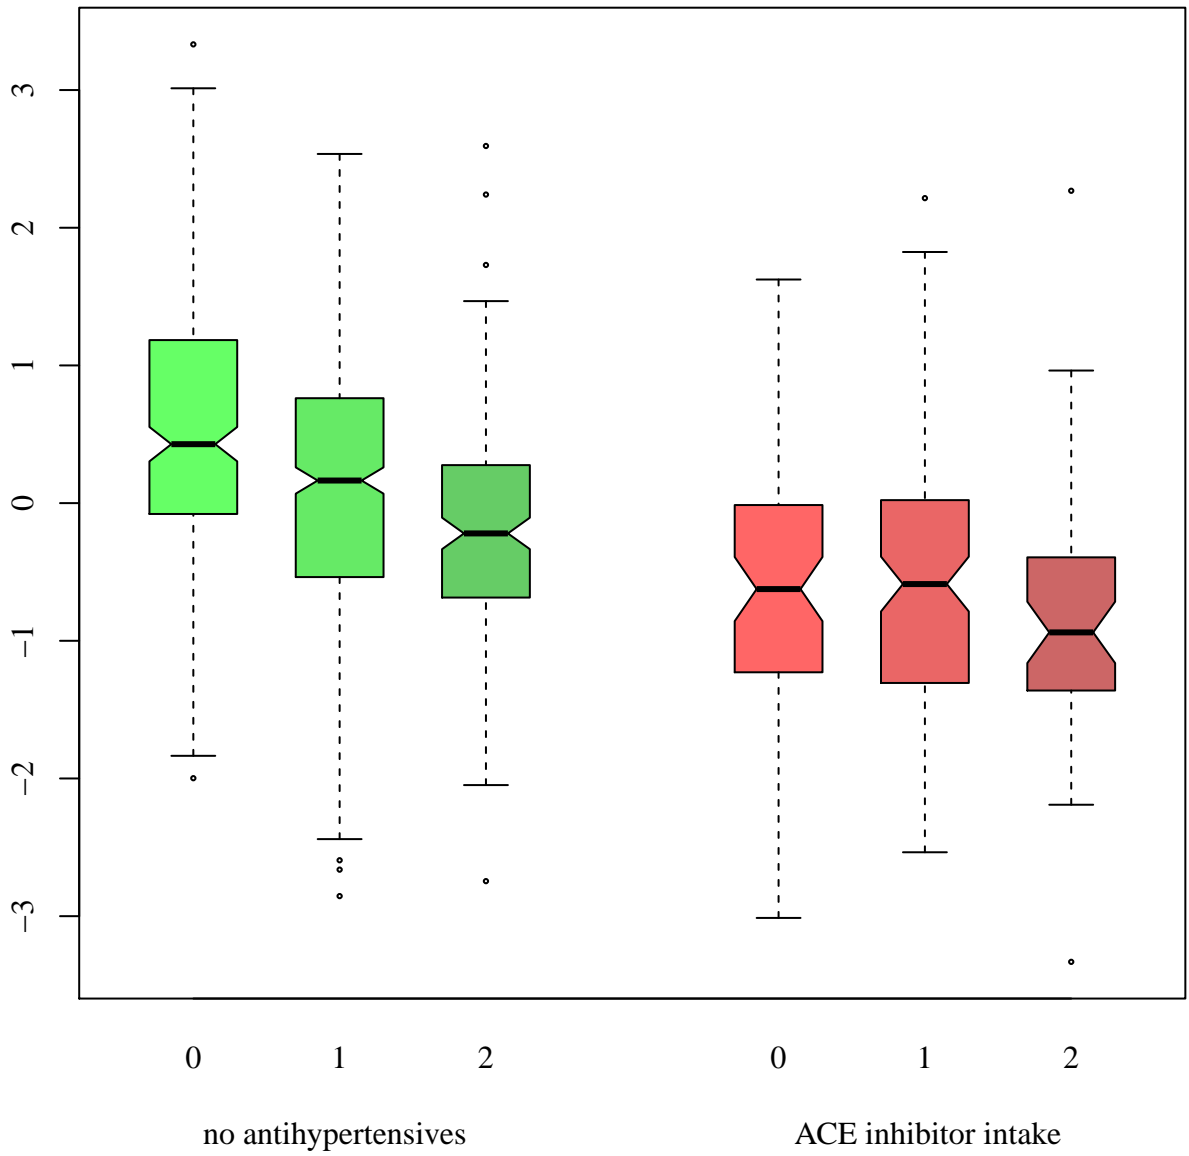

**X14086 – rs4337**

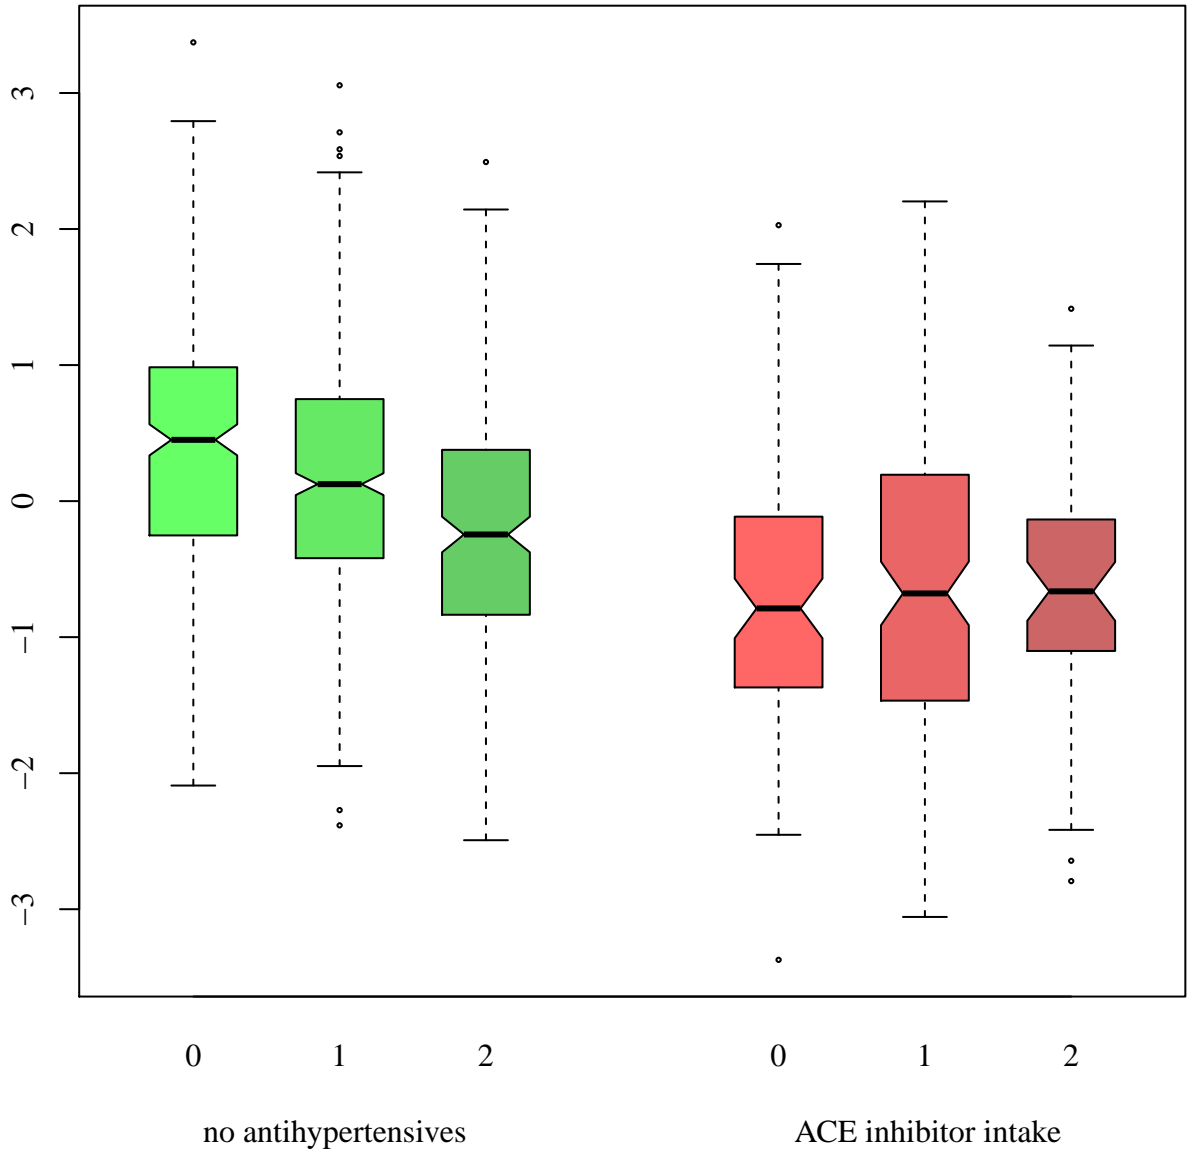

**X14189 – rs4337**

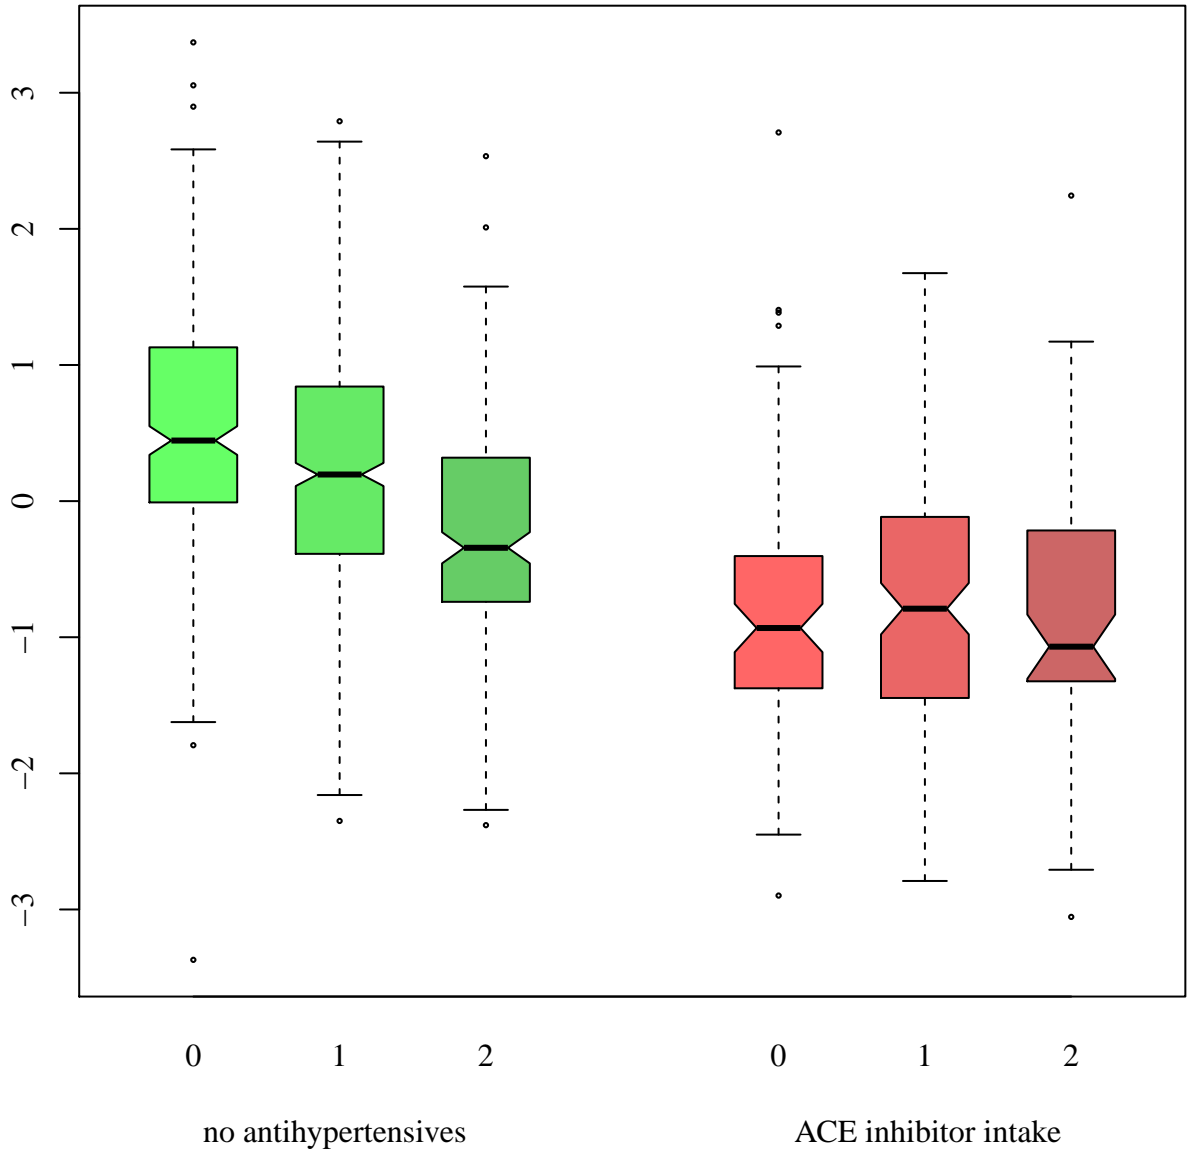

**X14205 – rs4337**

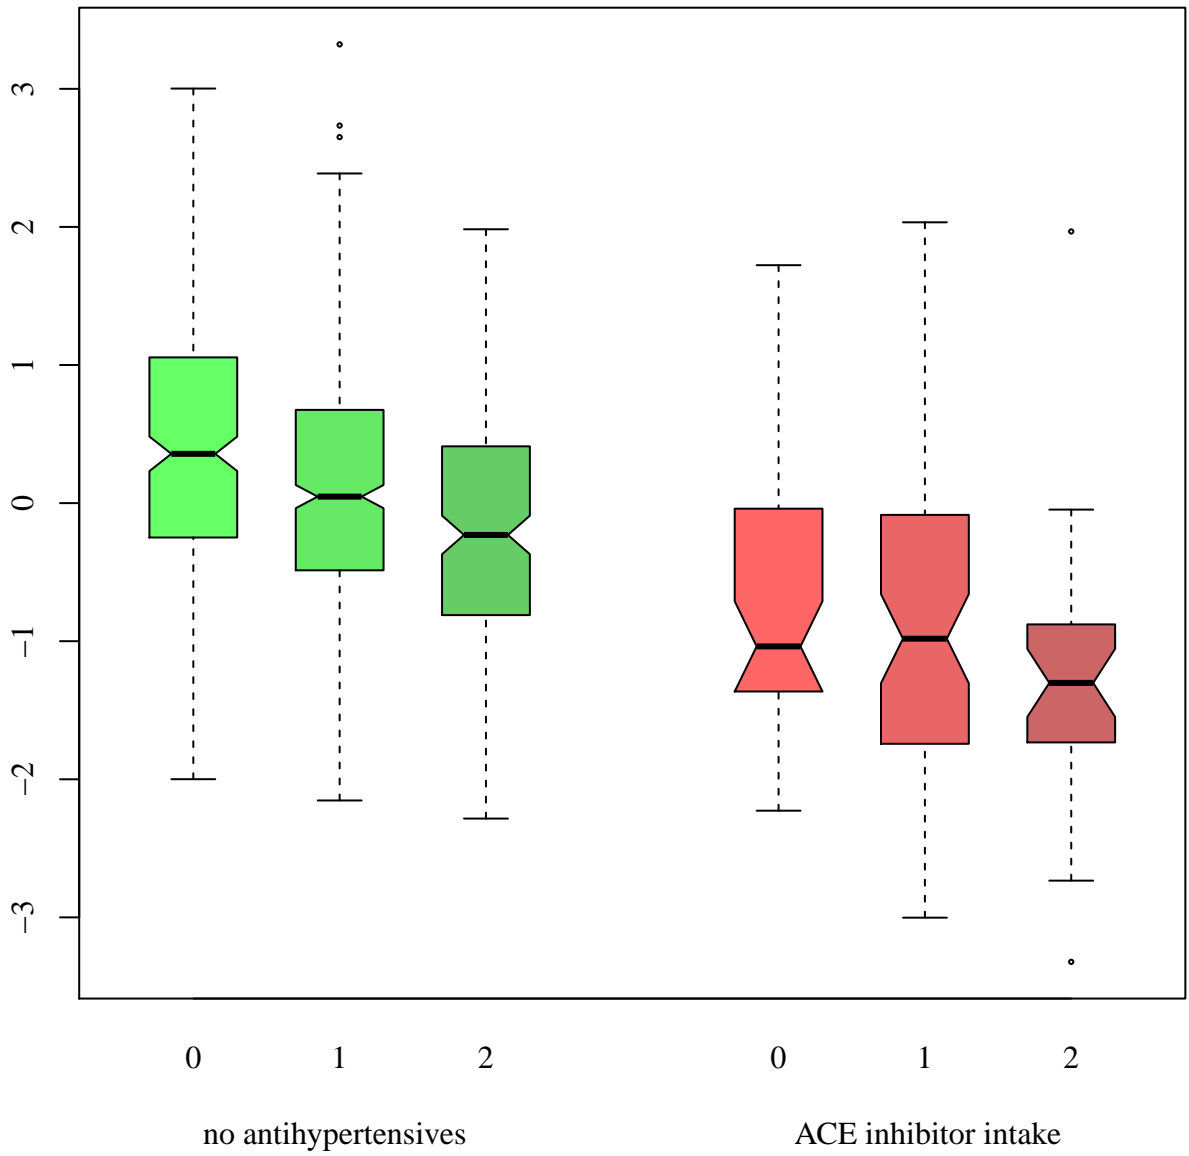

**X14208 – rs4337**

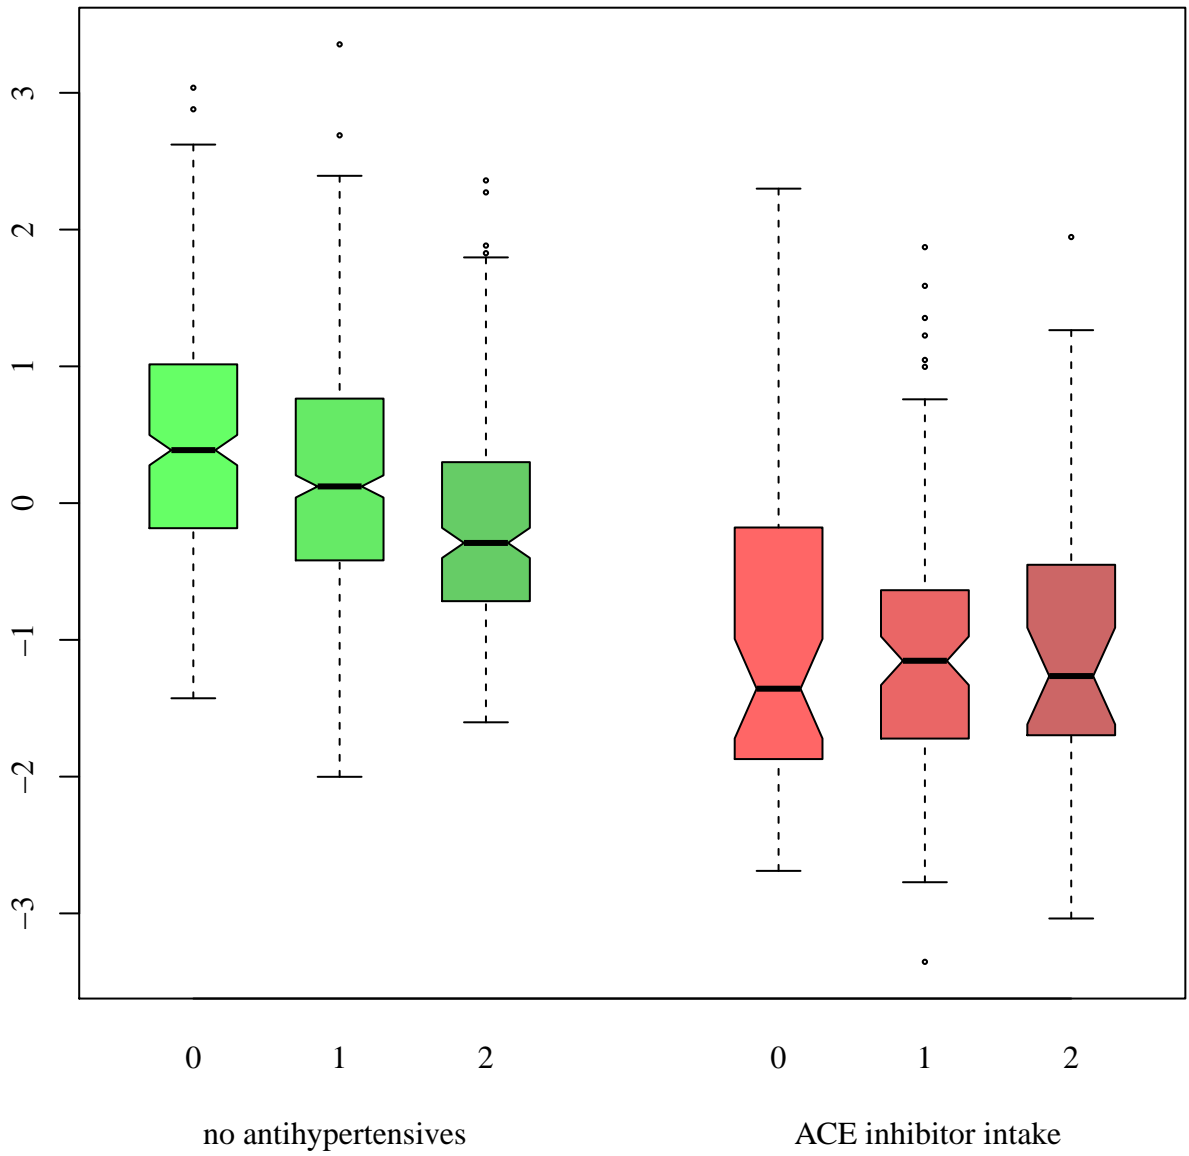

**X14304 – rs4337**

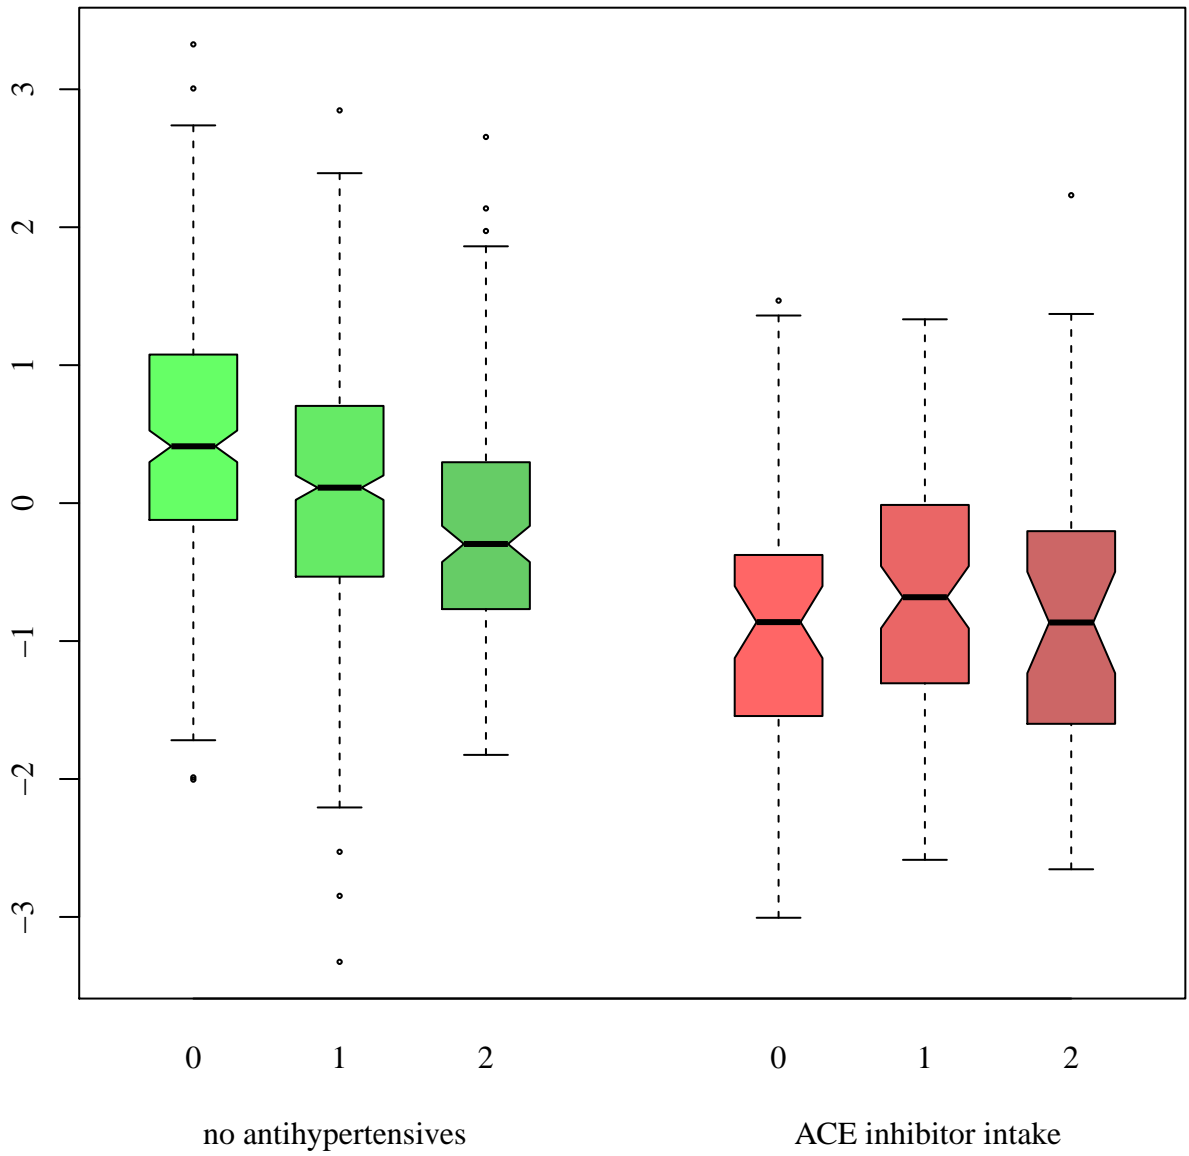

**aspartylphenylalanine – rs1987692**

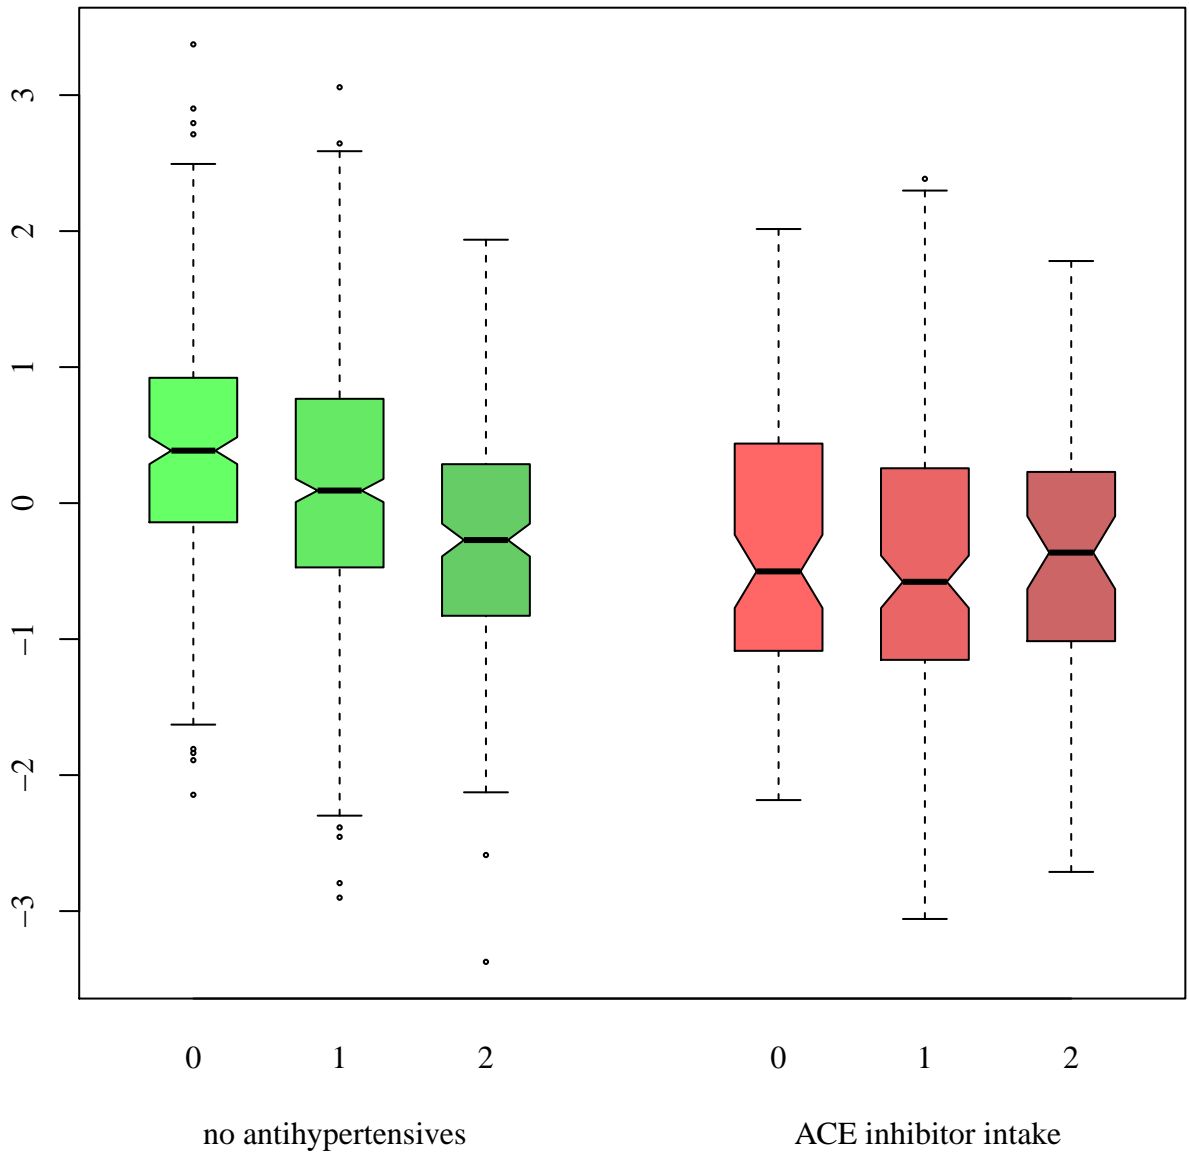



**aspartylphenylalanine/HWESASXX – rs1987692**

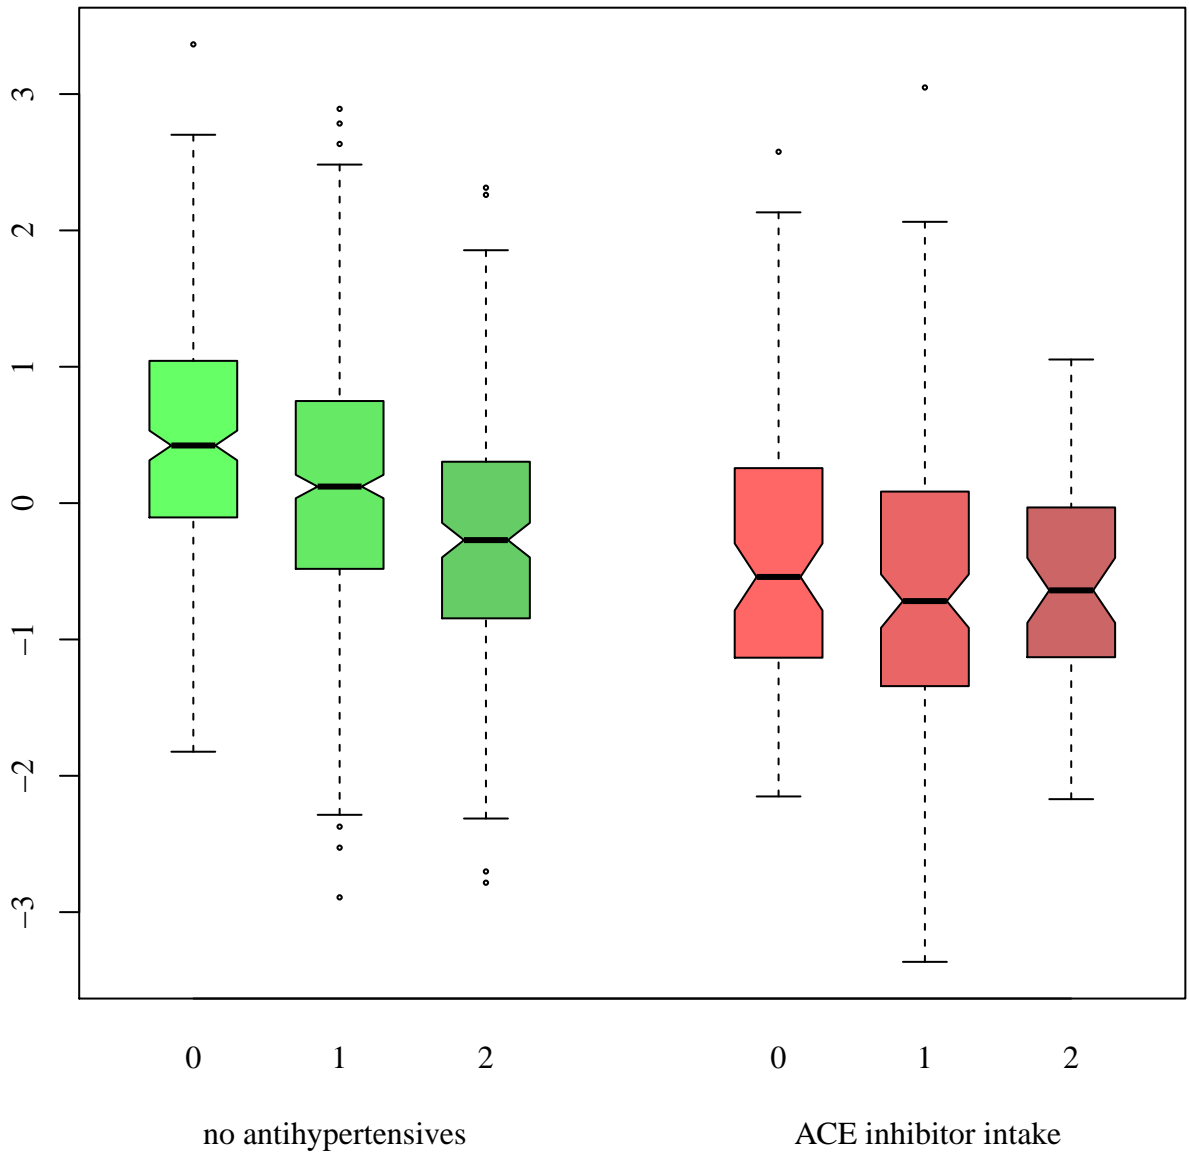

**aspartylphenylalanine/X11805 – rs1987692**

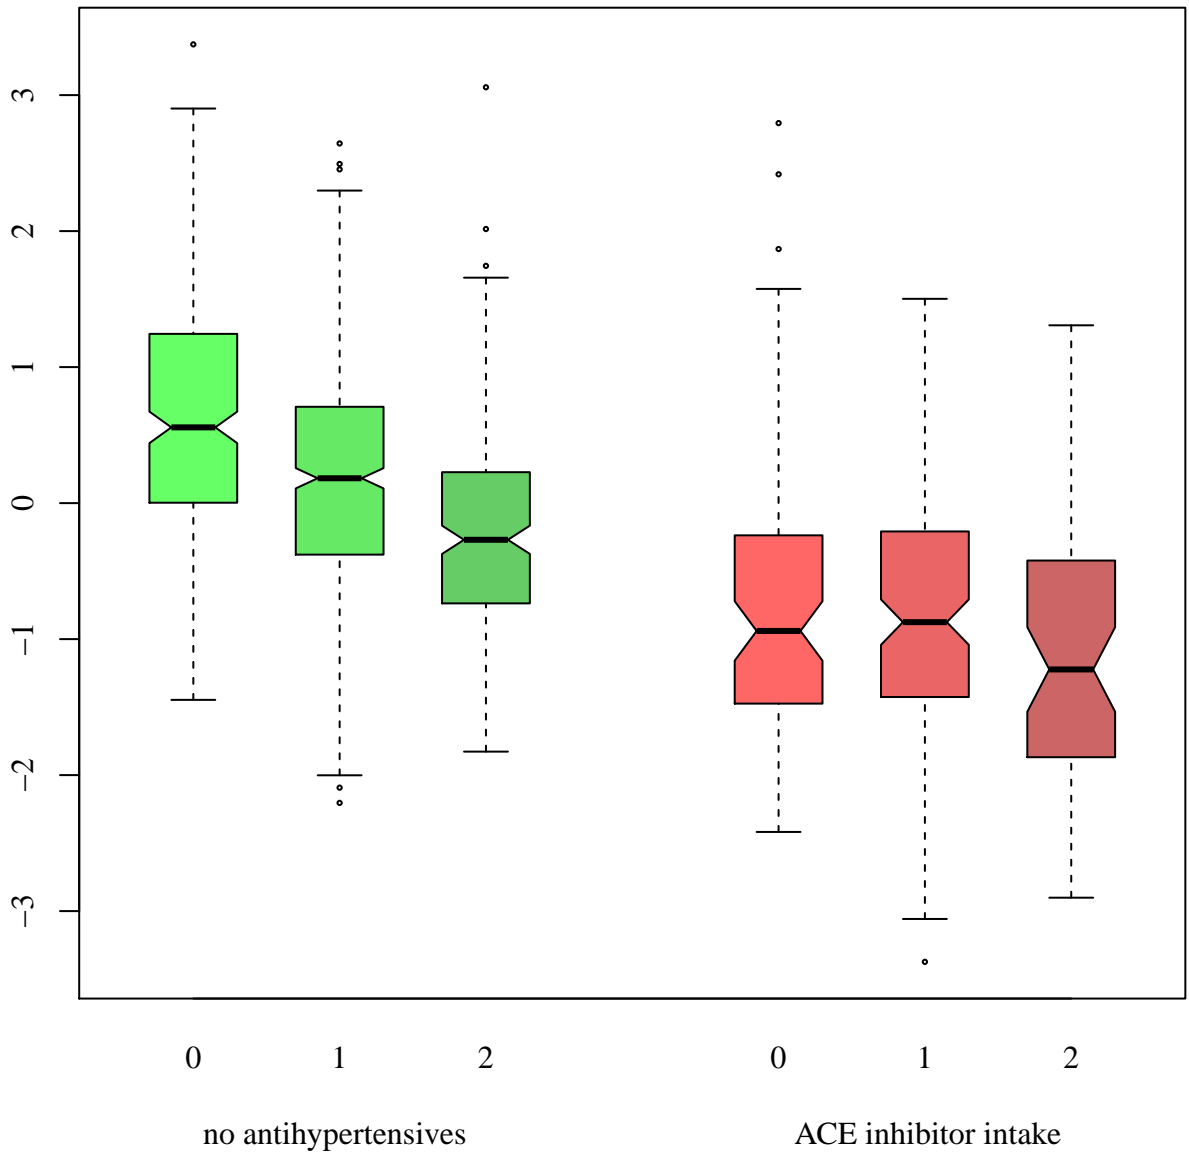

**aspartylphenylalanine/X14450 – rs1987692**

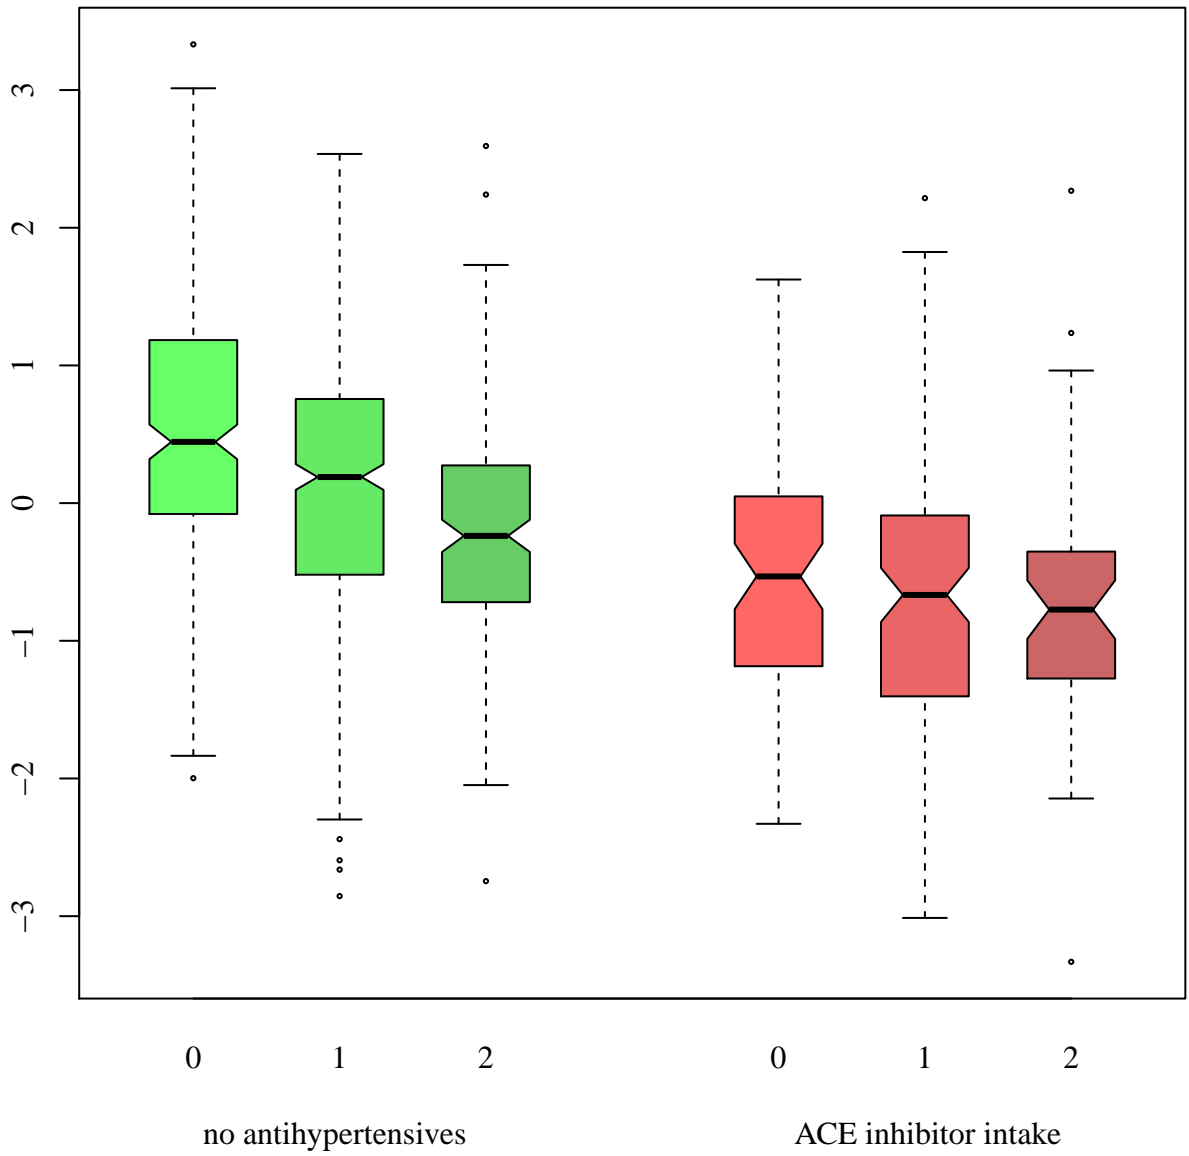

**X14086 – rs1987692**

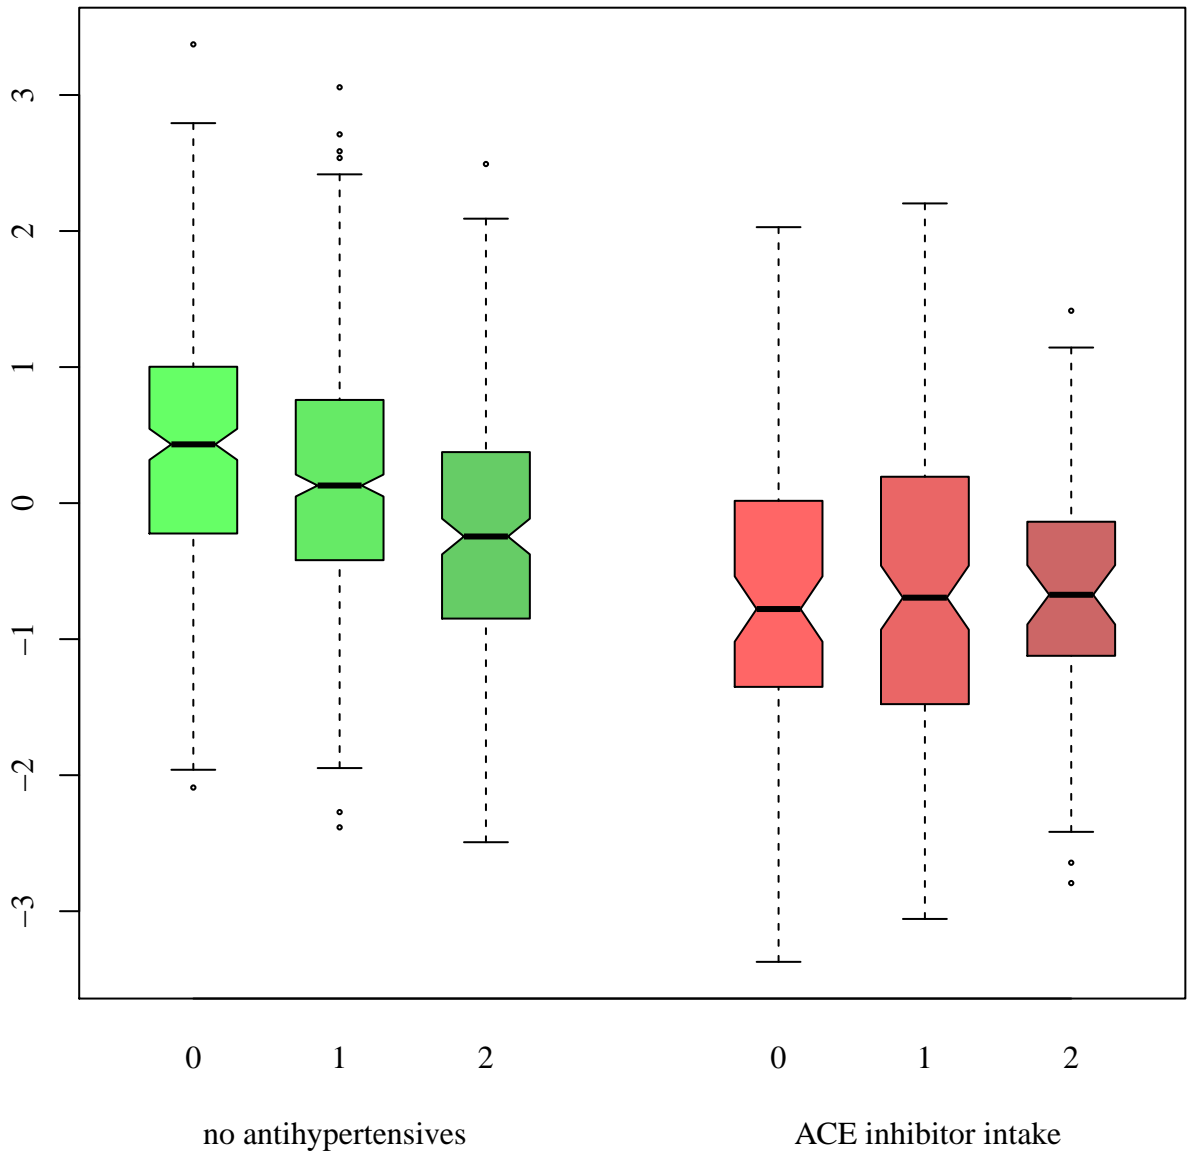

**X14189 – rs1987692**

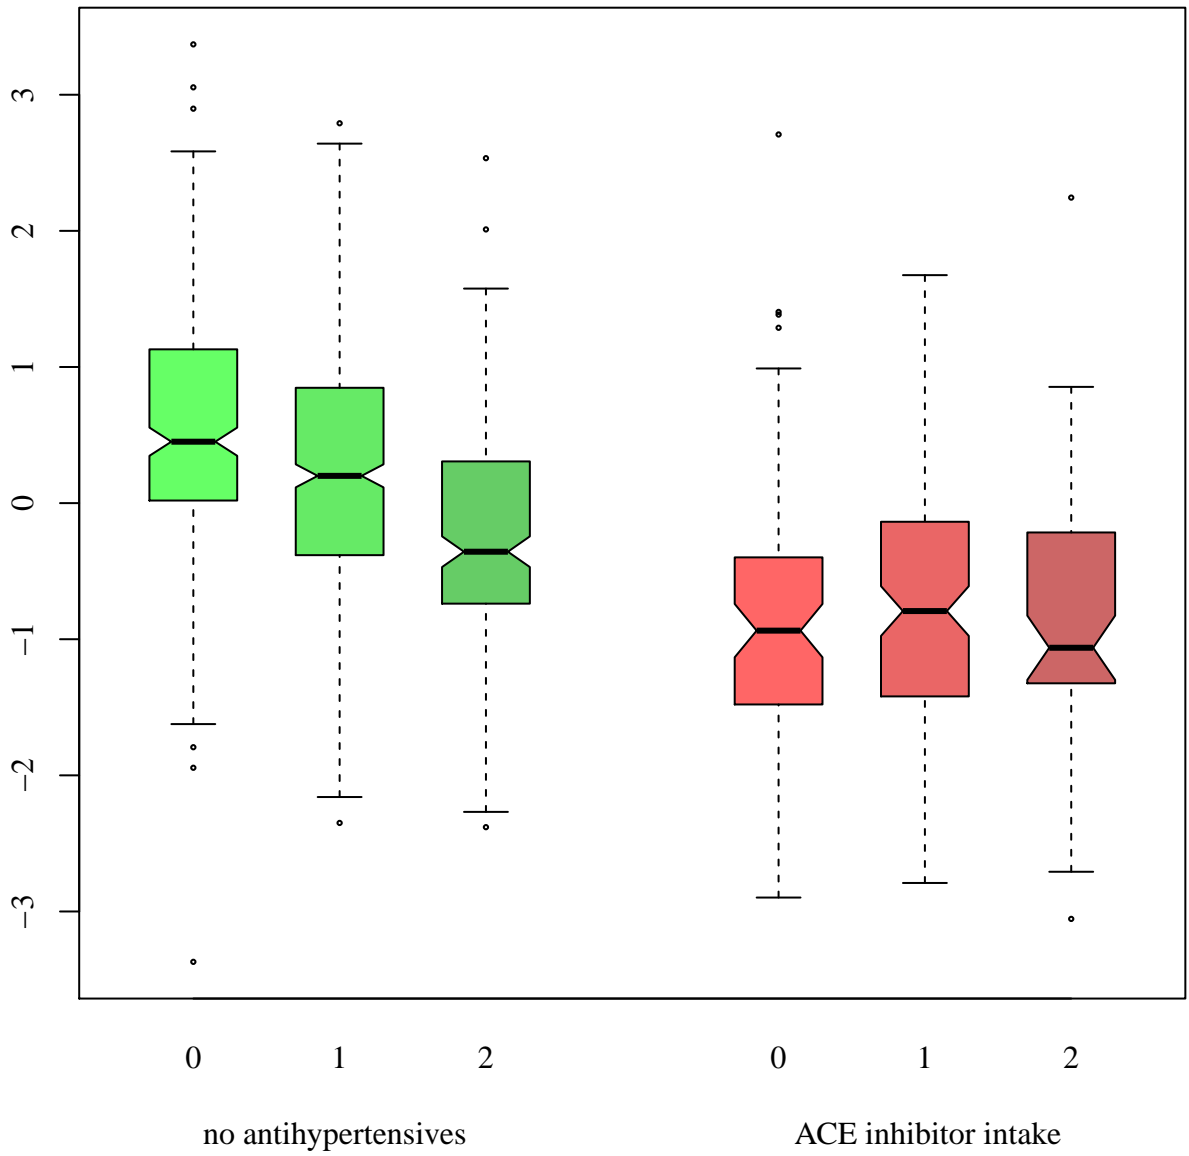

**X14205 – rs1987692**

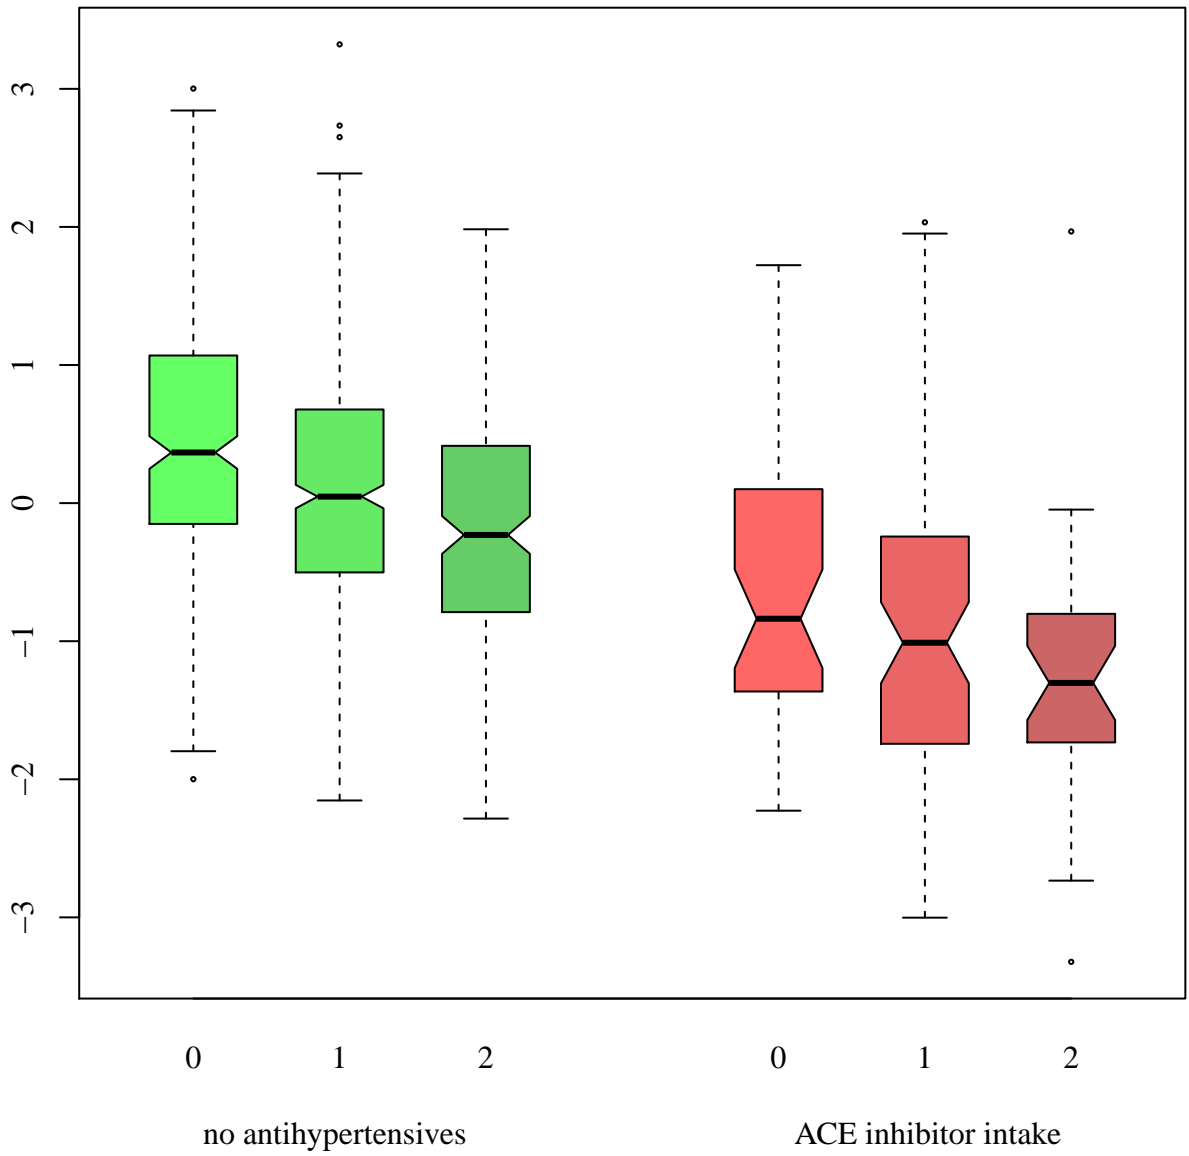

**X14208 – rs1987692**

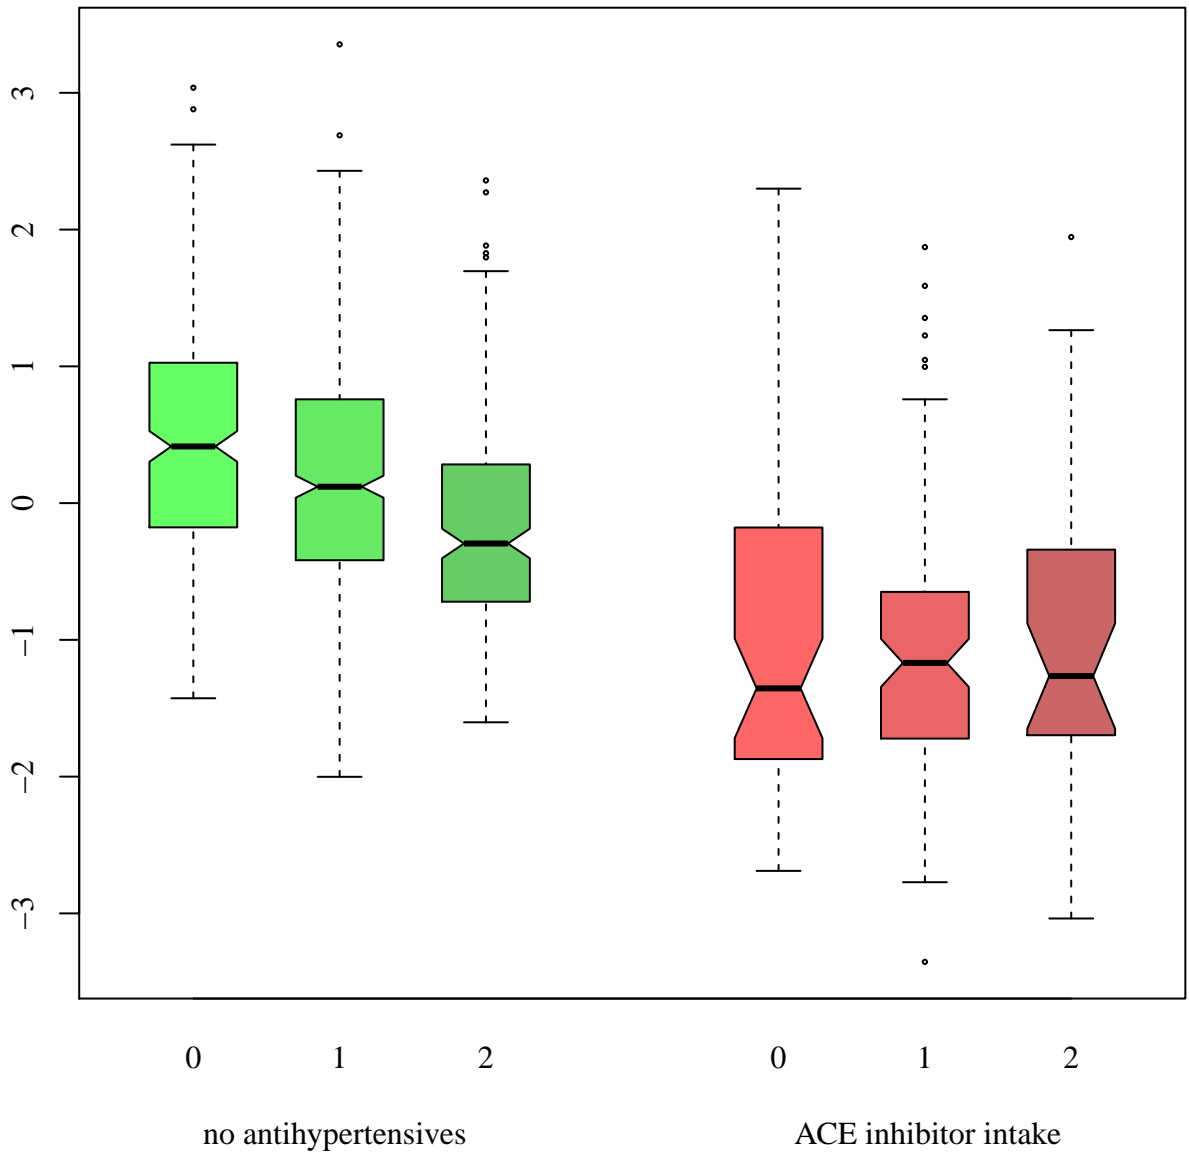

**X14304 – rs1987692**

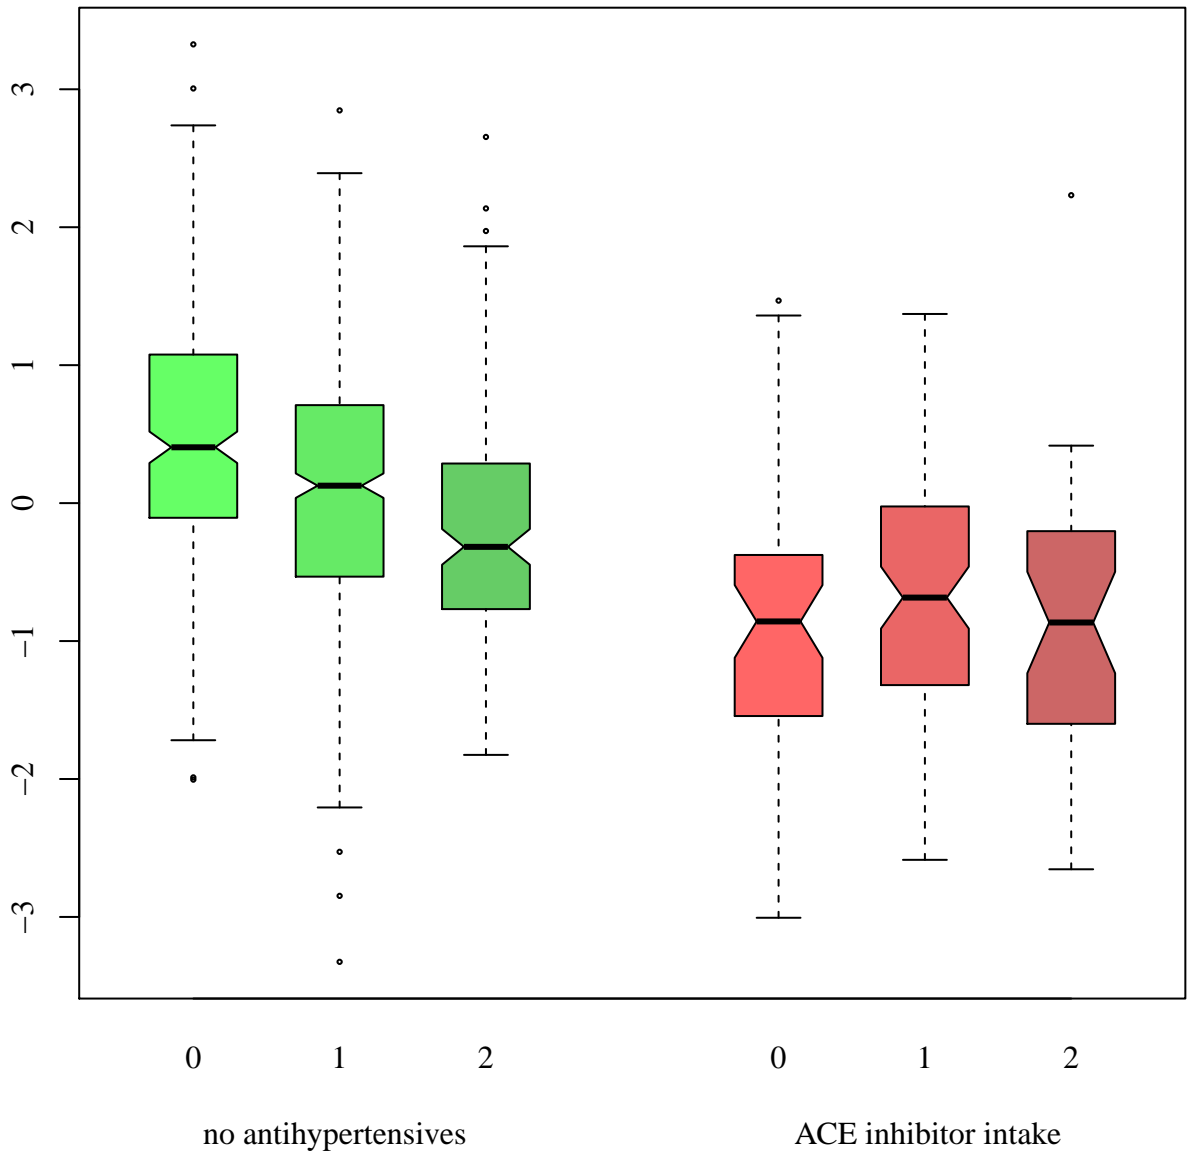



**aspartylphenylalanine – rs4341**



**aspartylphenylalanine/HWESASXX – rs4341**



aspartylphenylalanine/X11805 – rs4341



aspartylphenylalanine/X14450 – rs4341



**X14086 – rs4341**



**X14189 – rs4341**

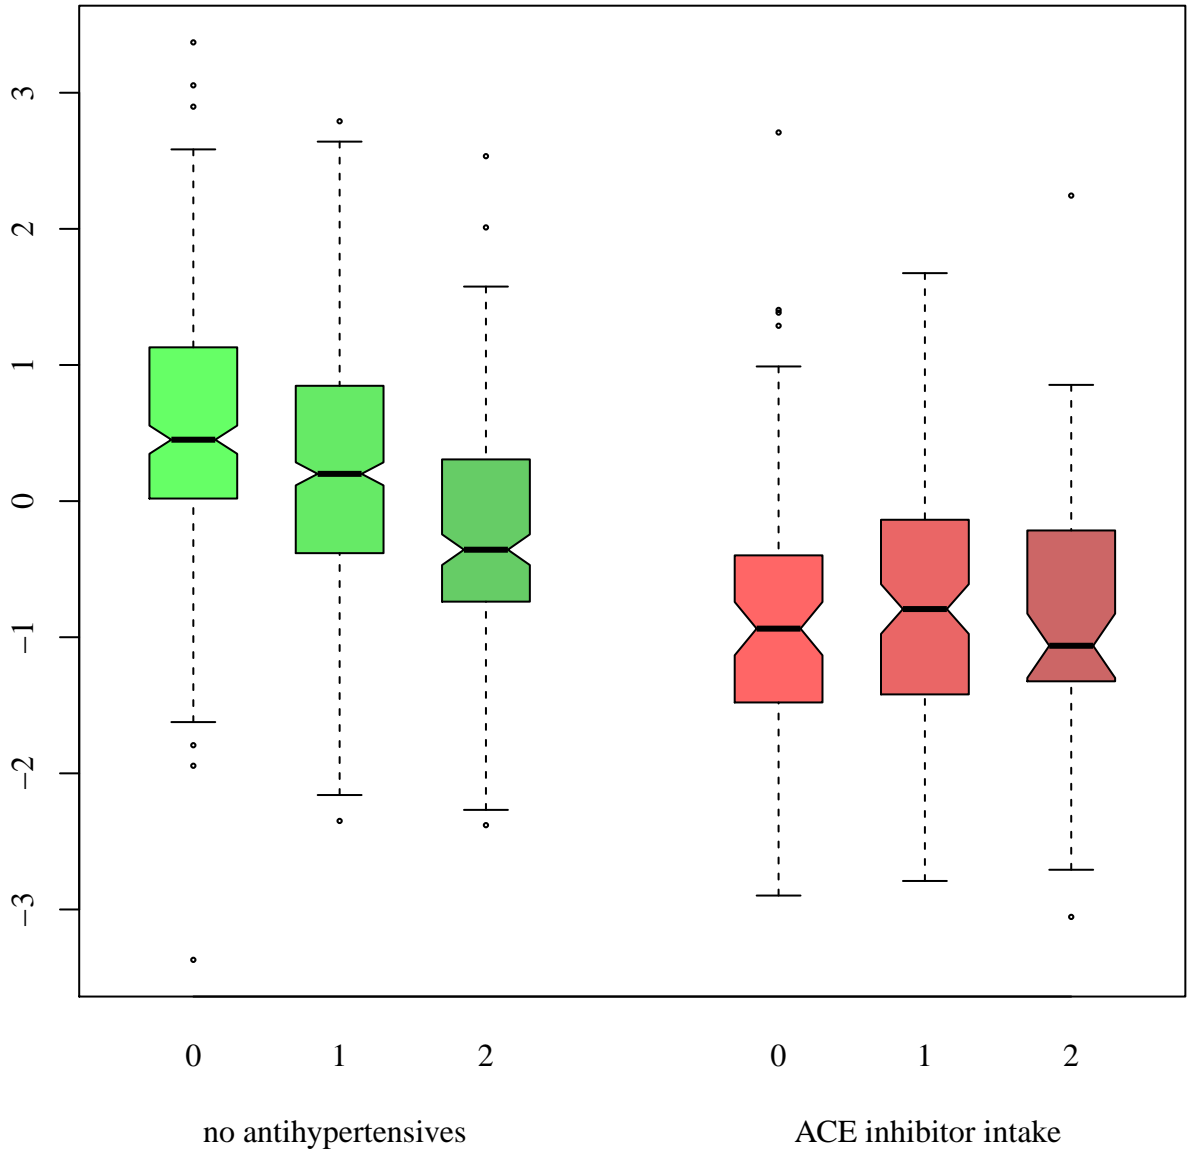

**X14205 – rs4341**

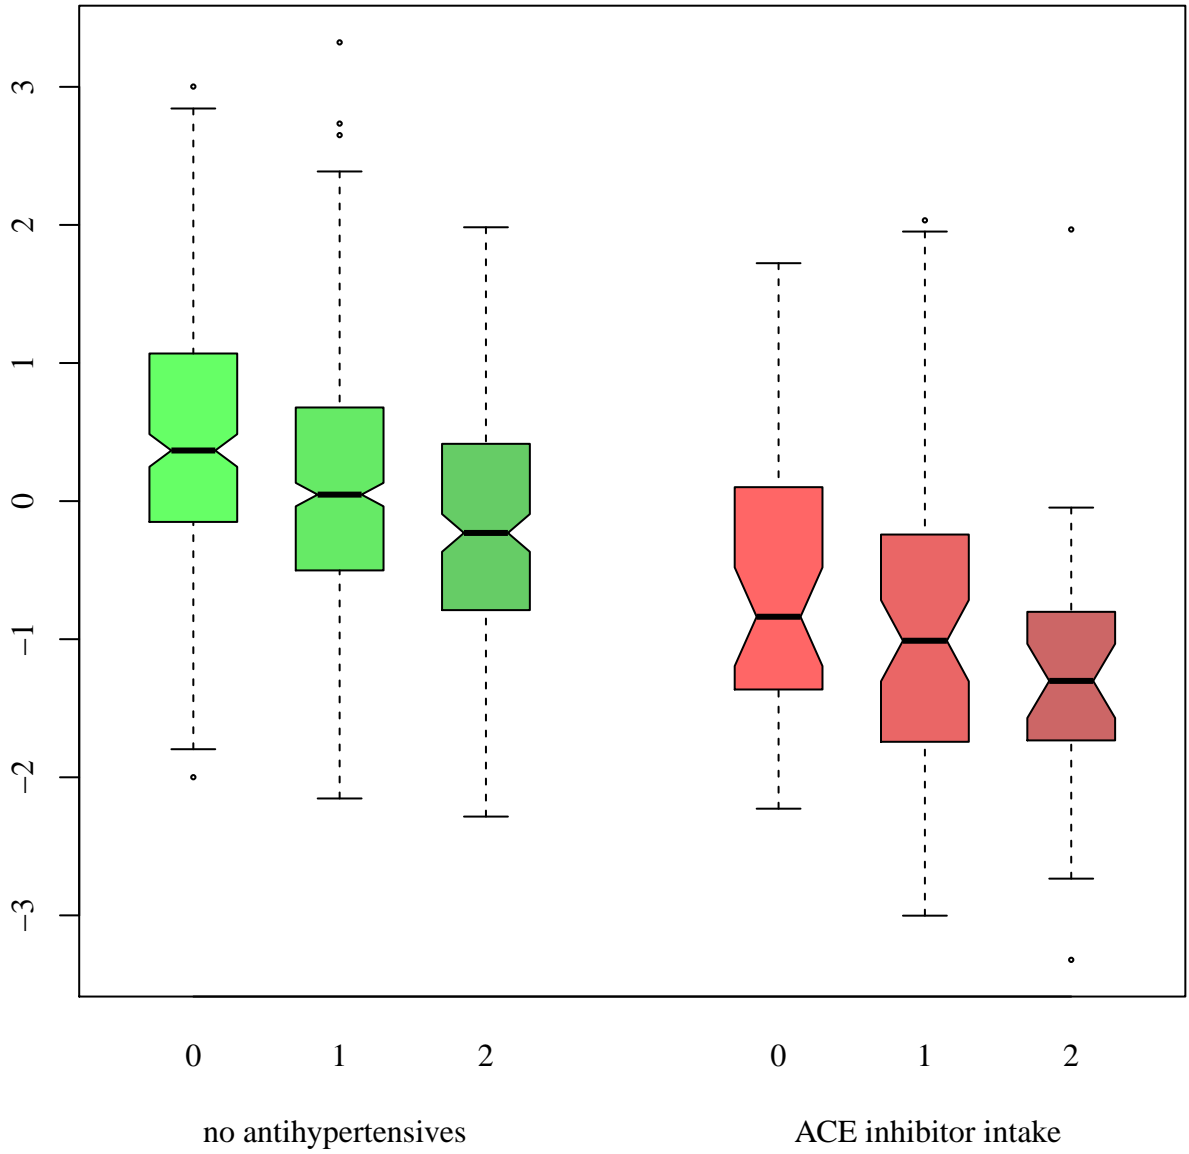

**X14208 – rs4341**

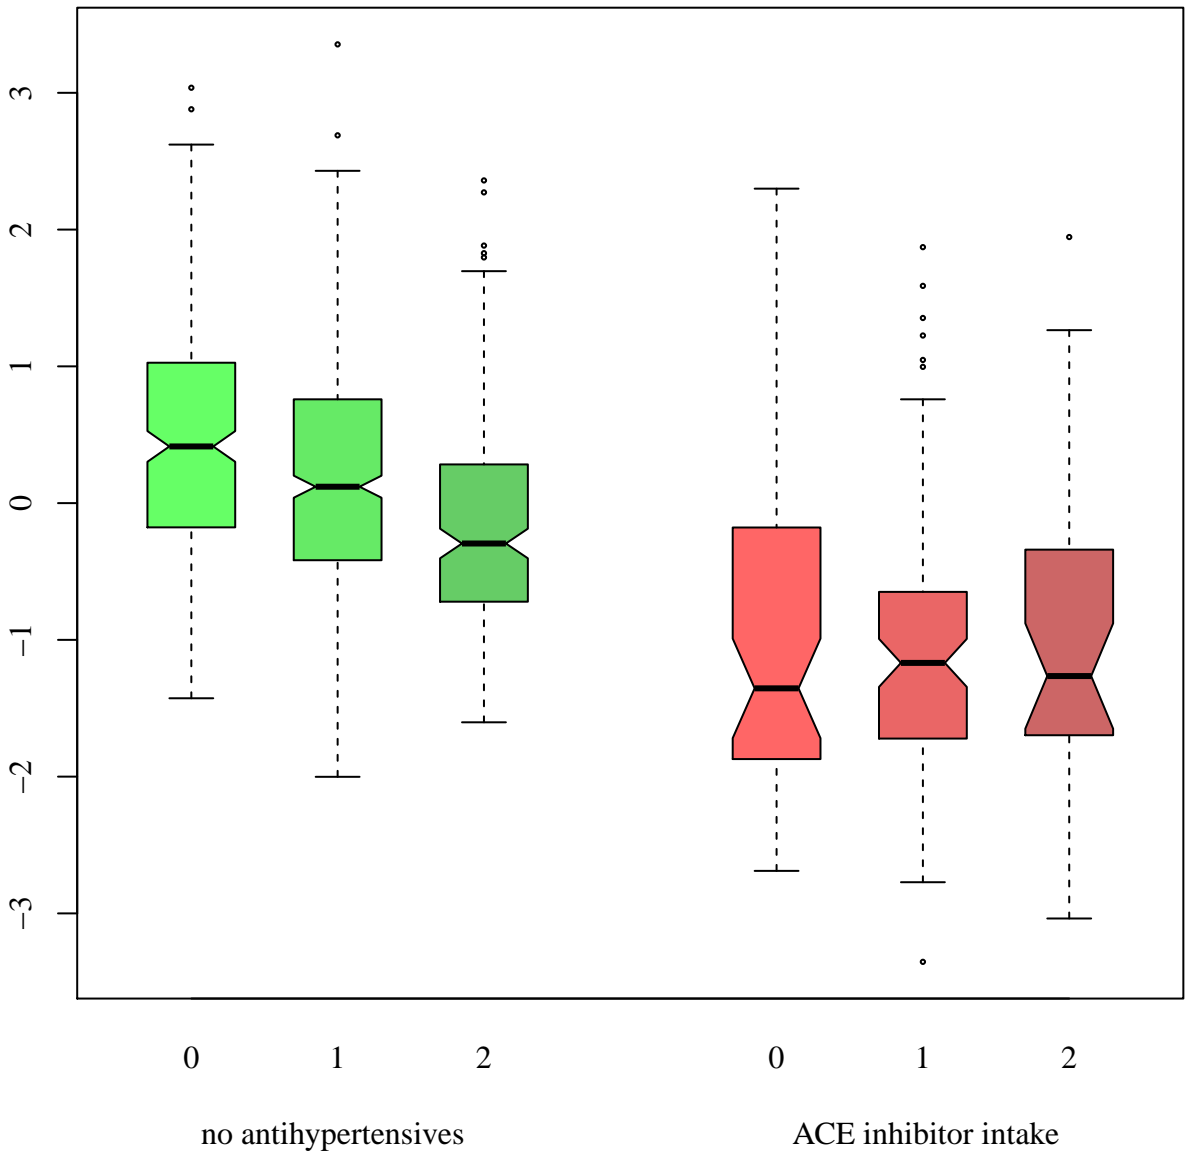



**X14304 – rs4341**

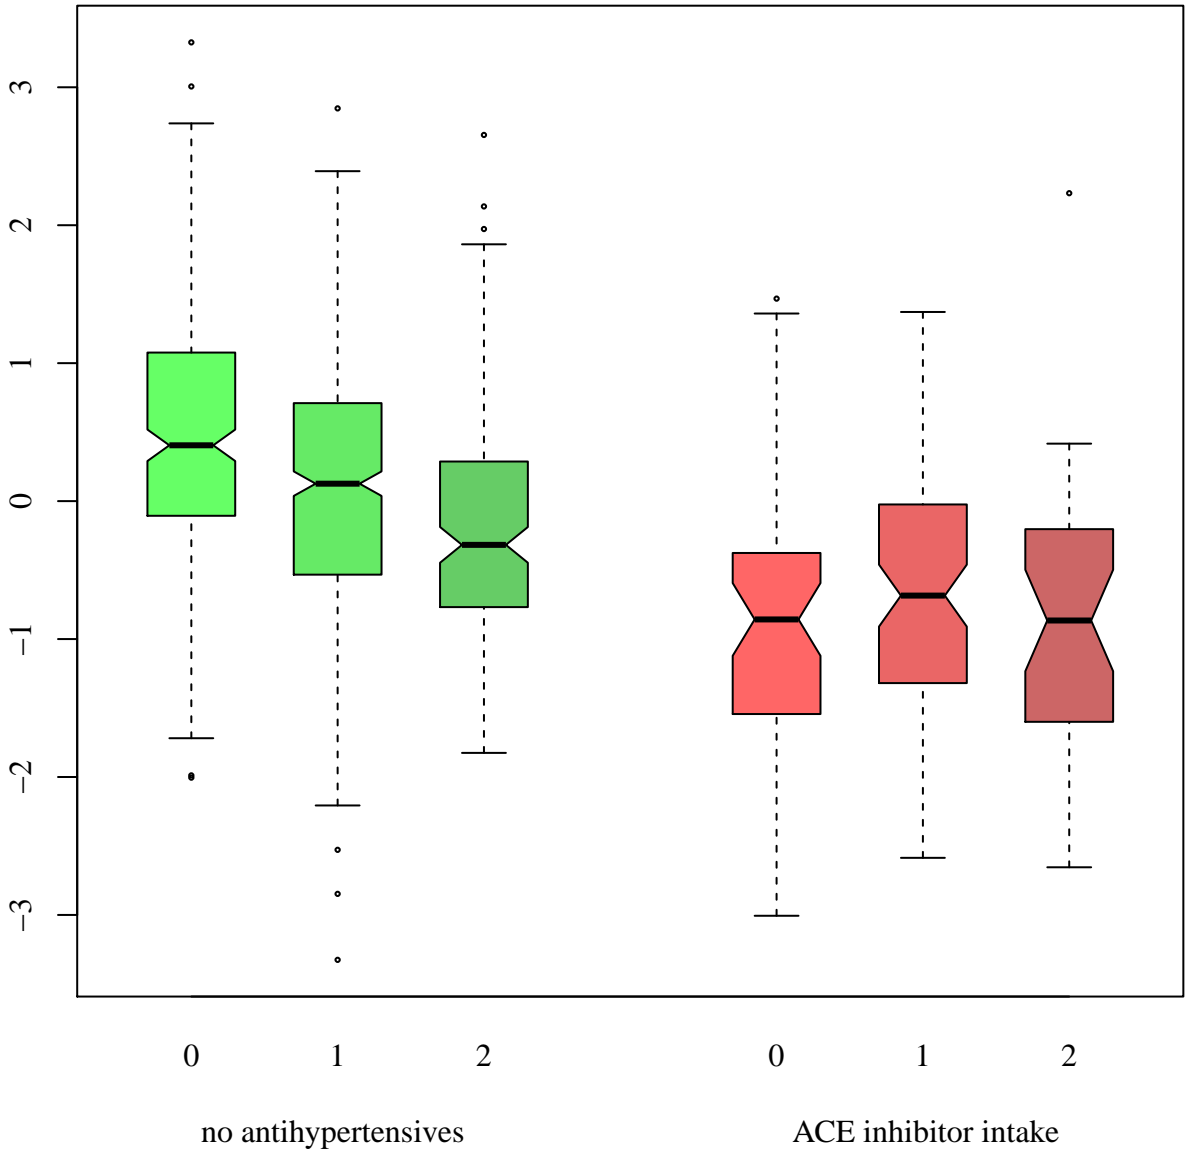

aspartylphenylalanine – rs4342



**aspartylphenylalanine/HWESASXX – rs4342**



**aspartylphenylalanine/X11805 – rs4342**



**aspartylphenylalanine/X14450 – rs4342**



**X14086 – rs4342**

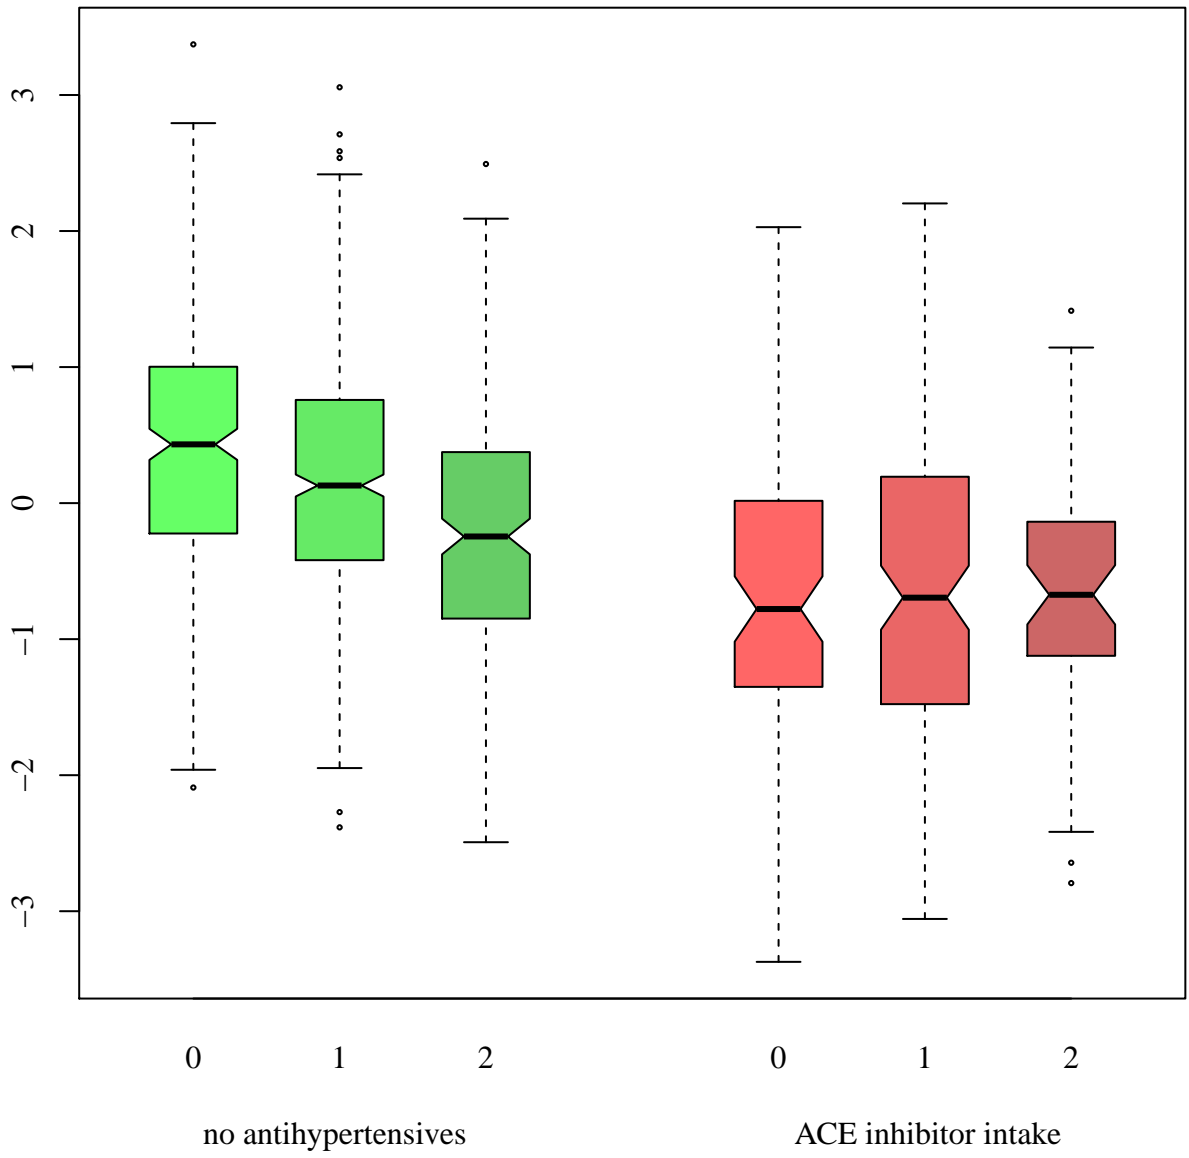

**X14189 – rs4342**



**X14205 – rs4342**





**X14208 – rs4342**



**X14304 – rs4342**



**aspartylphenylalanine – rs4343**

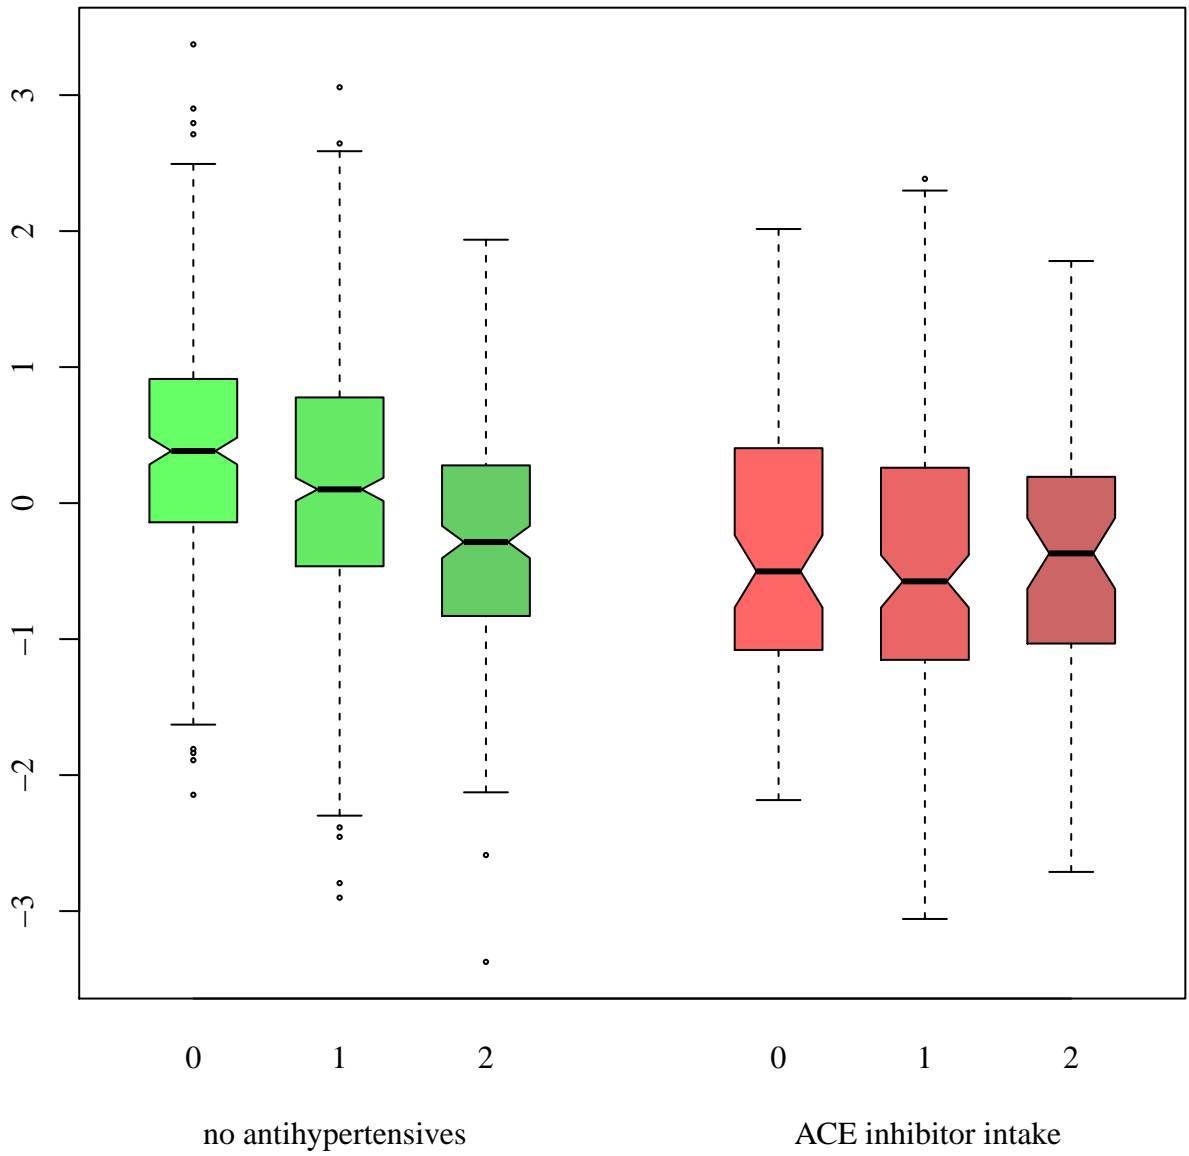

**aspartylphenylalanine/HWESASXX – rs4343**

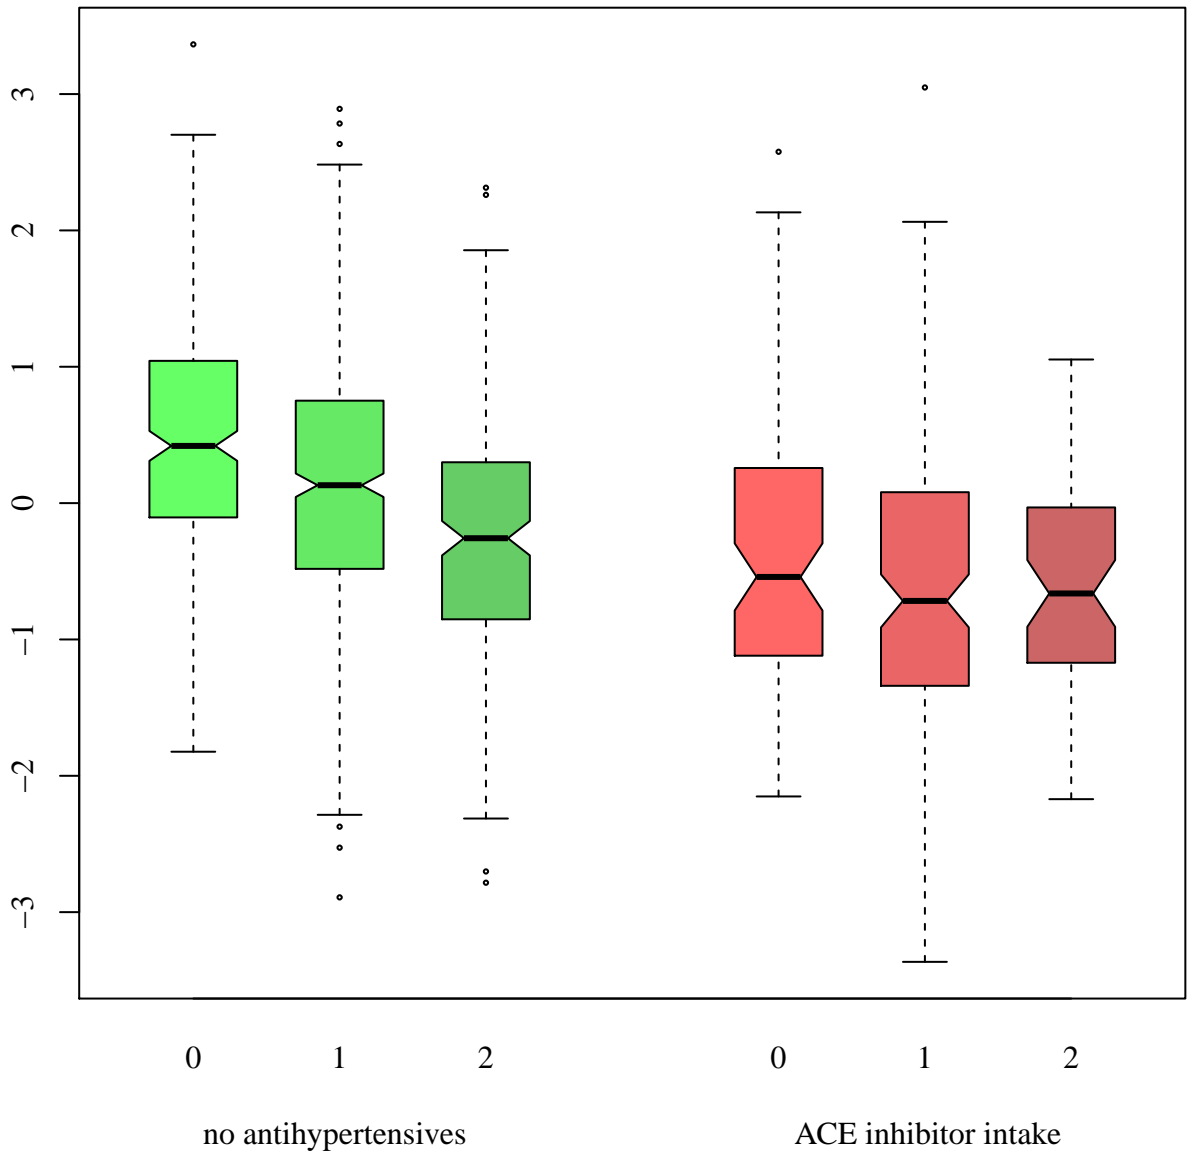

aspartylphenylalanine/X11805 – rs4343

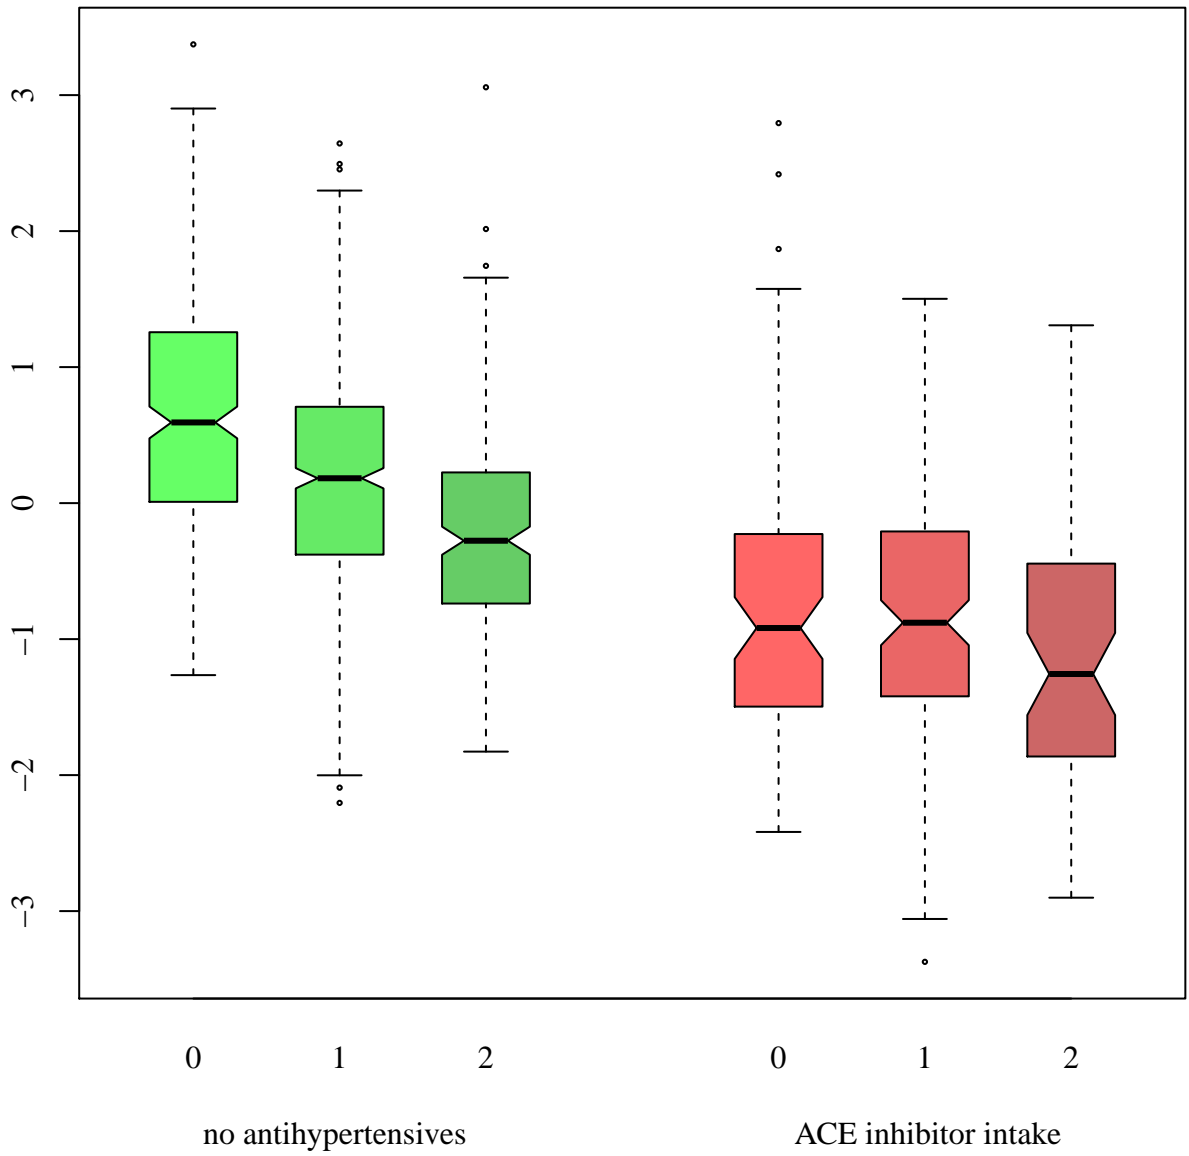

aspartylphenylalanine/X14450 – rs4343

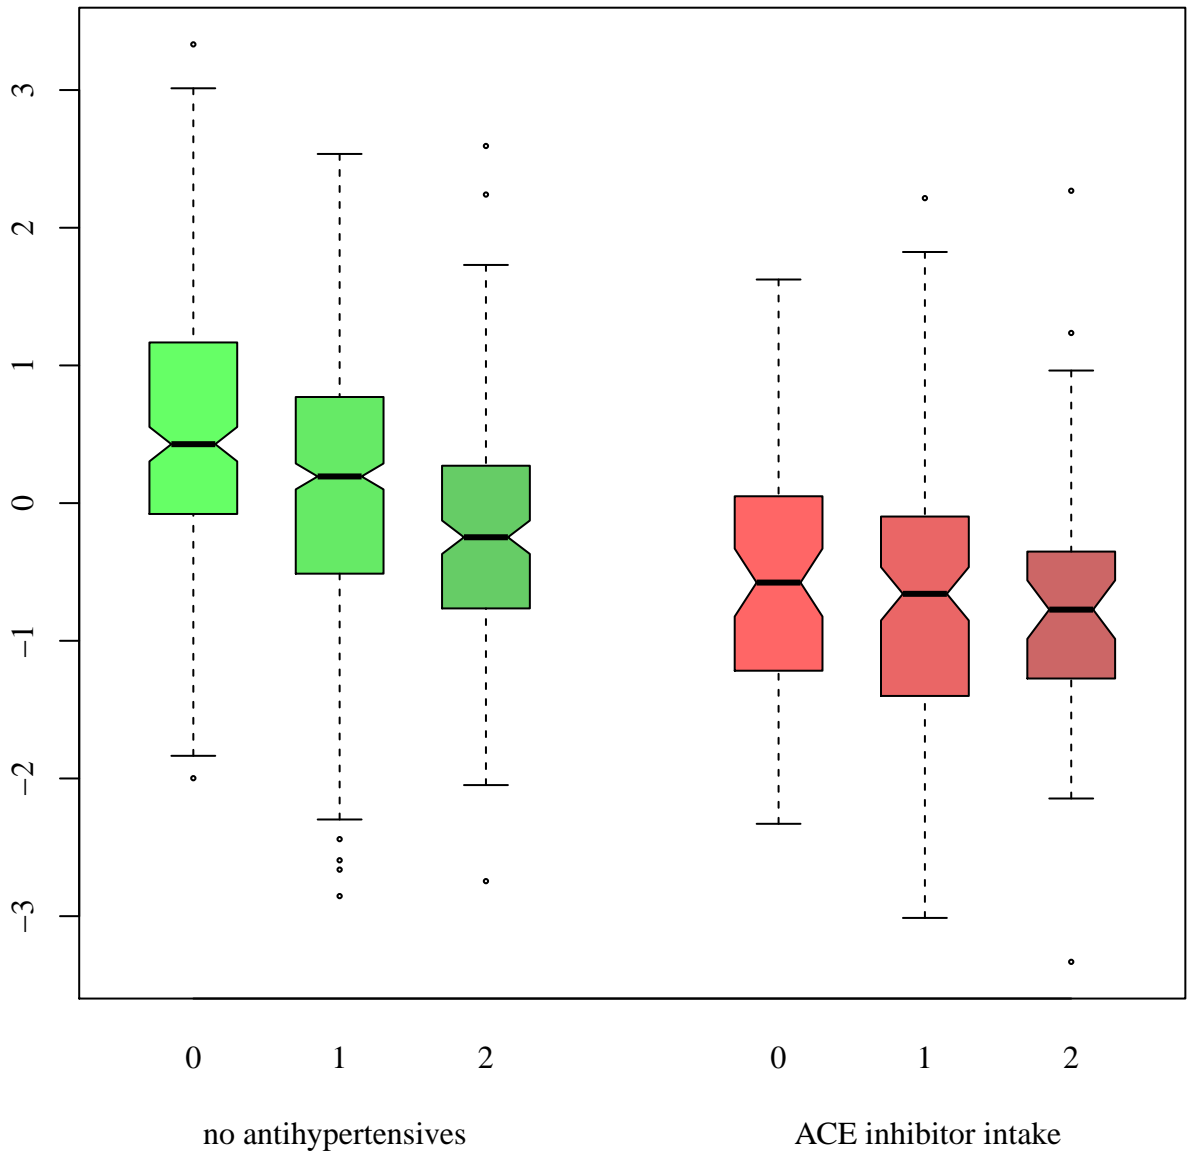

**X14086 – rs4343**

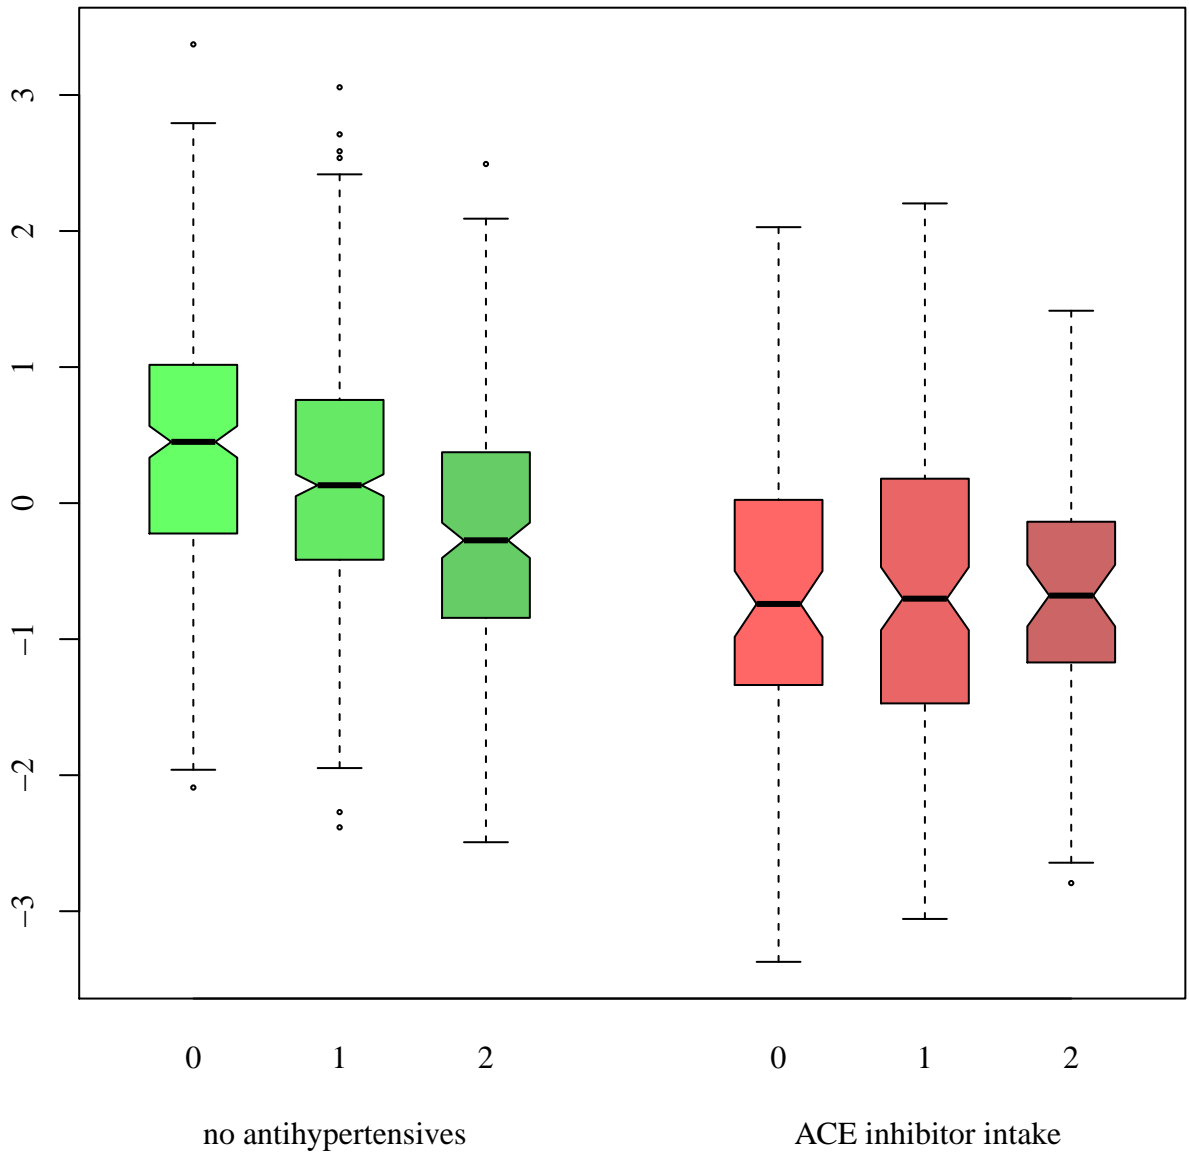

**X14189 – rs4343**

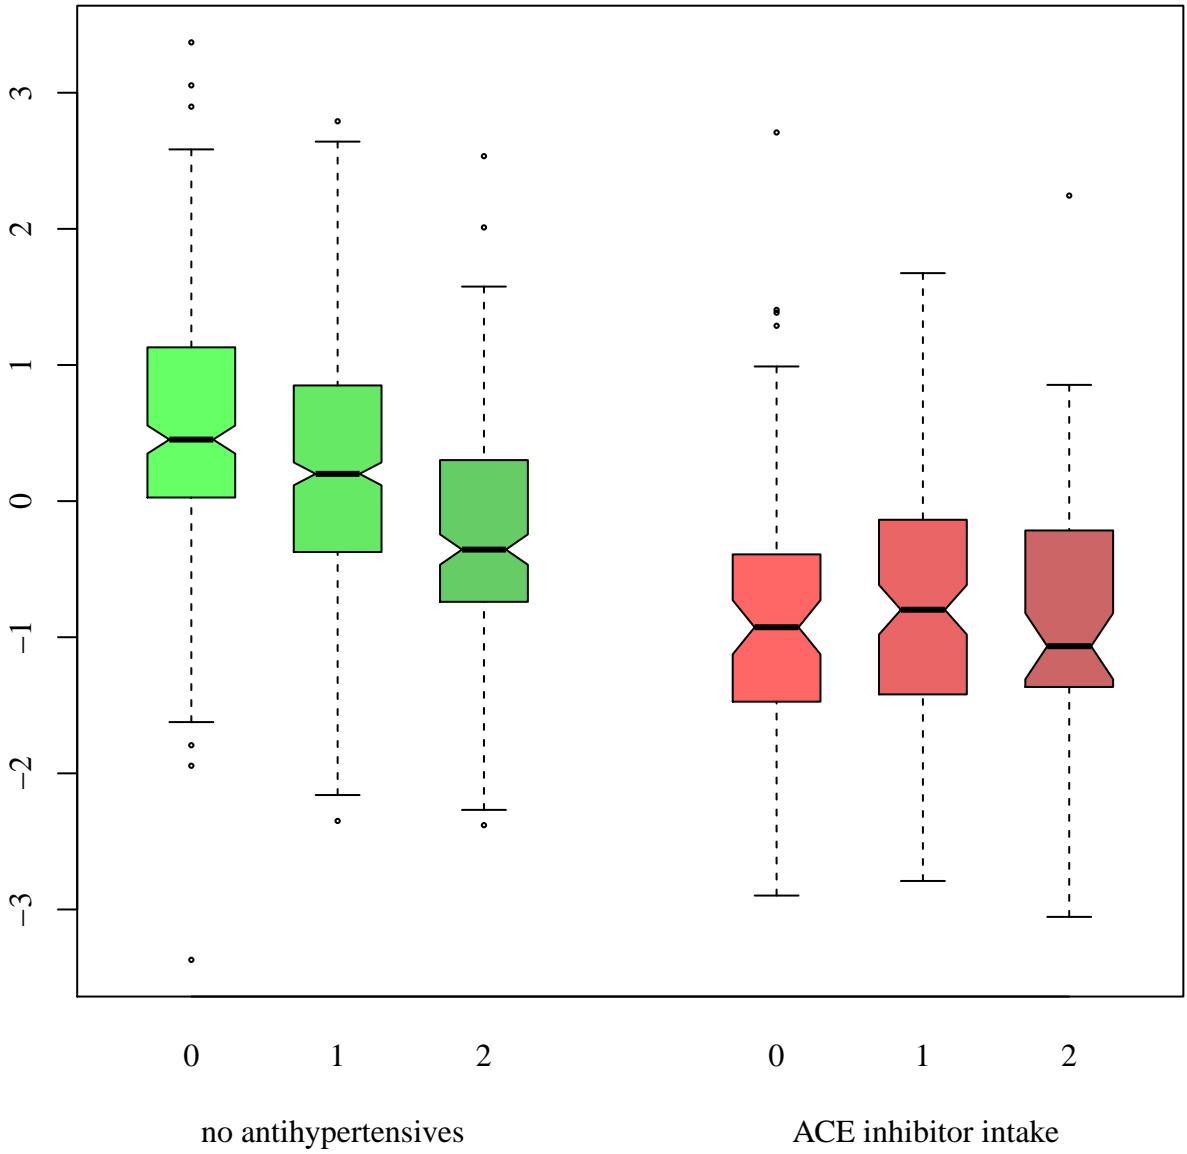



**X14205 – rs4343**

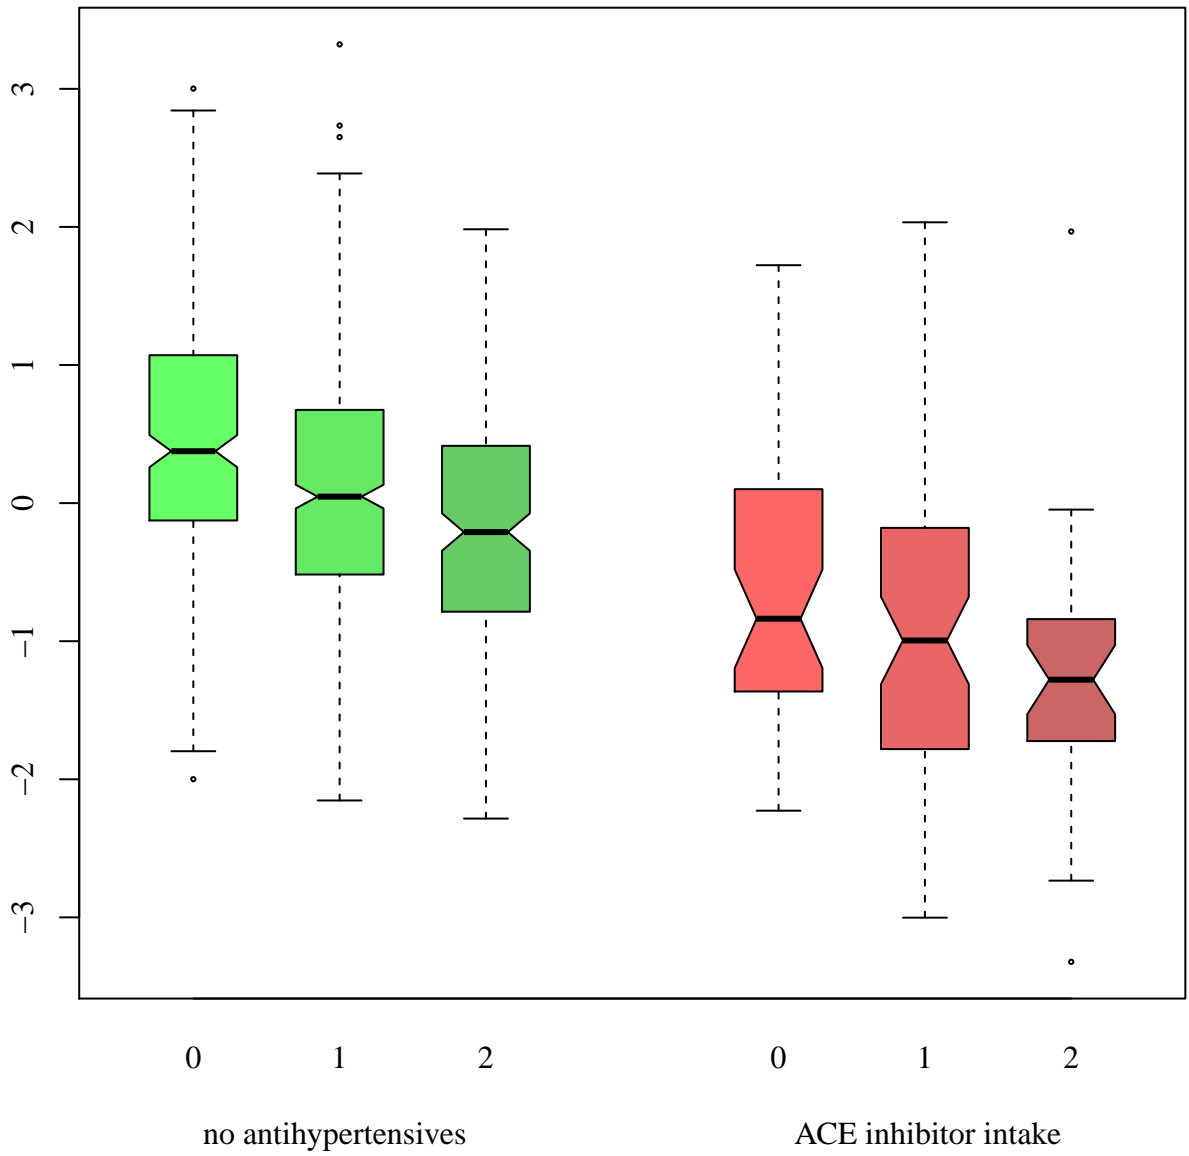

**X14208 – rs4343**

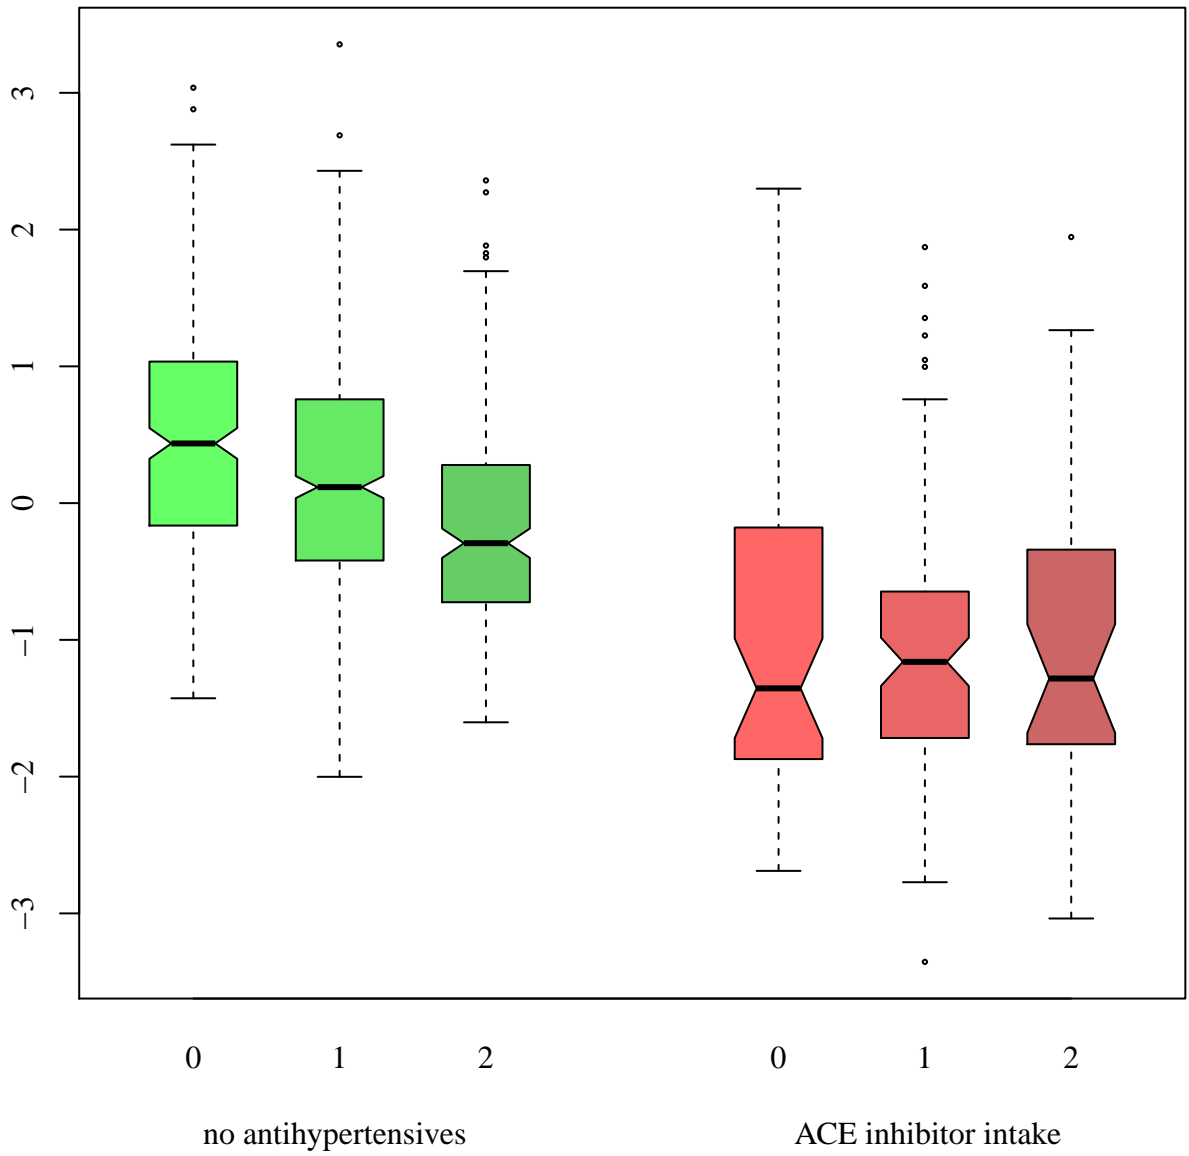

**X14304 – rs4343**

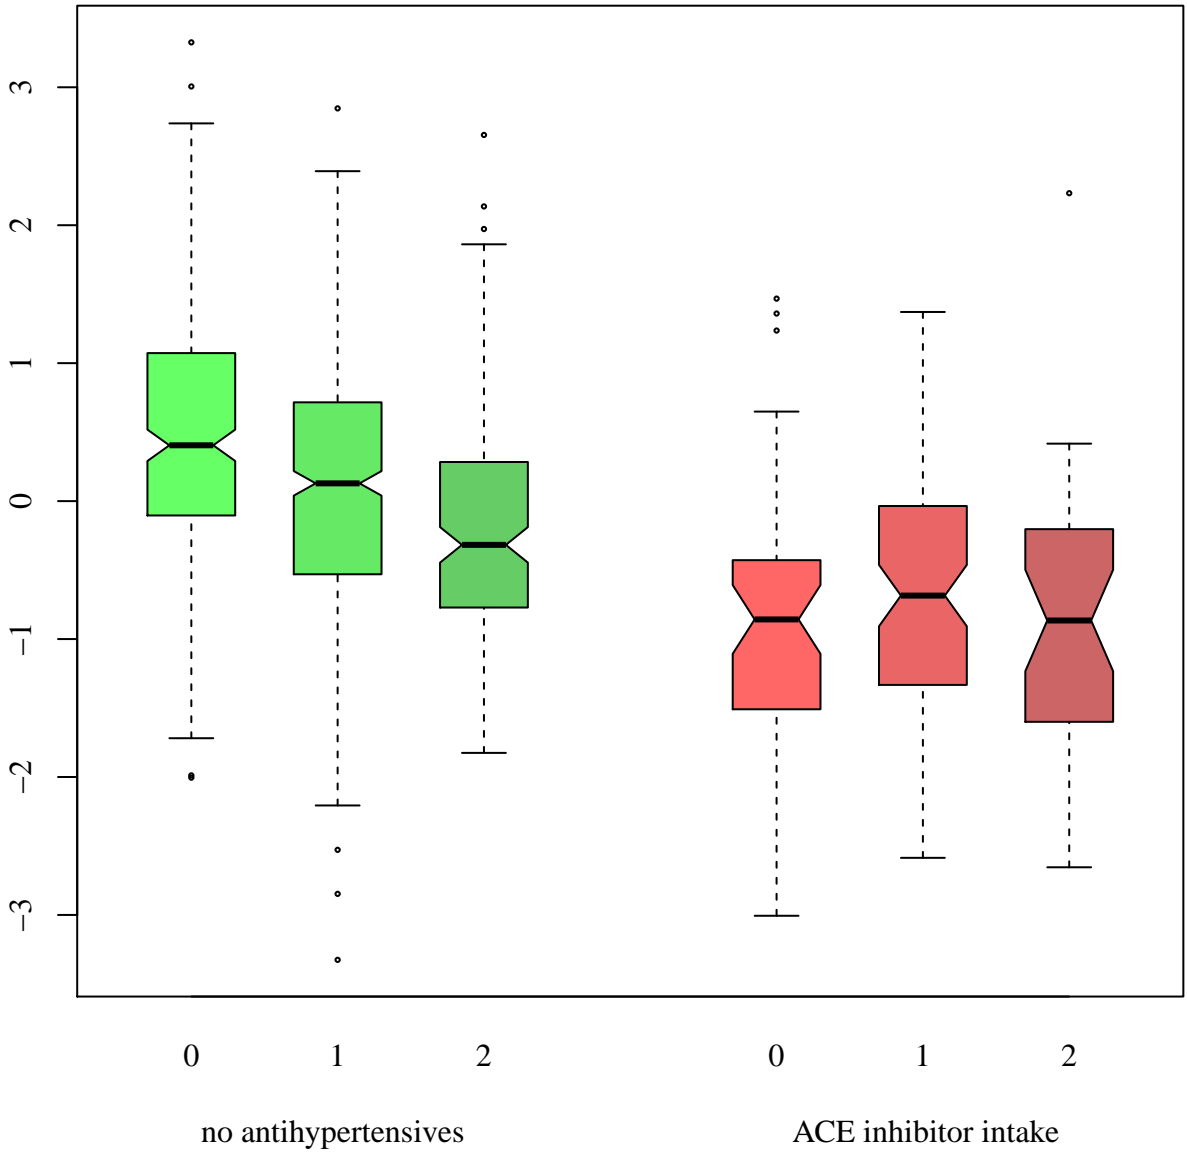

aspartylphenylalanine – rs4344



**aspartylphenylalanine/HWESASXX – rs4344**



**aspartylphenylalanine/X11805 – rs4344**



**aspartylphenylalanine/X14450 – rs4344**



**X14086 – rs4344**

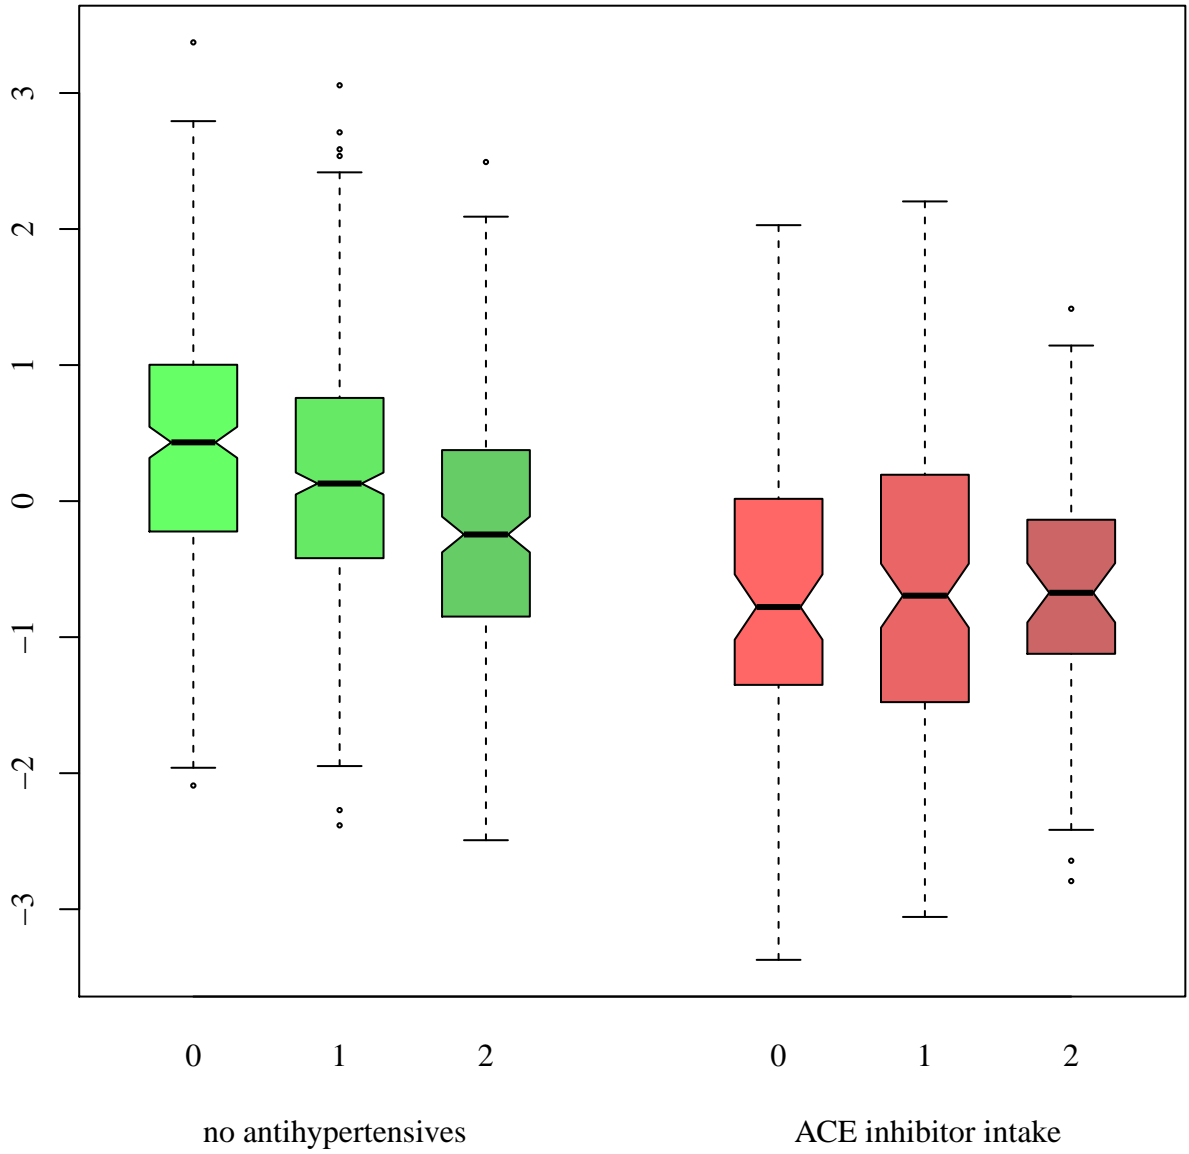



**X14189 – rs4344**

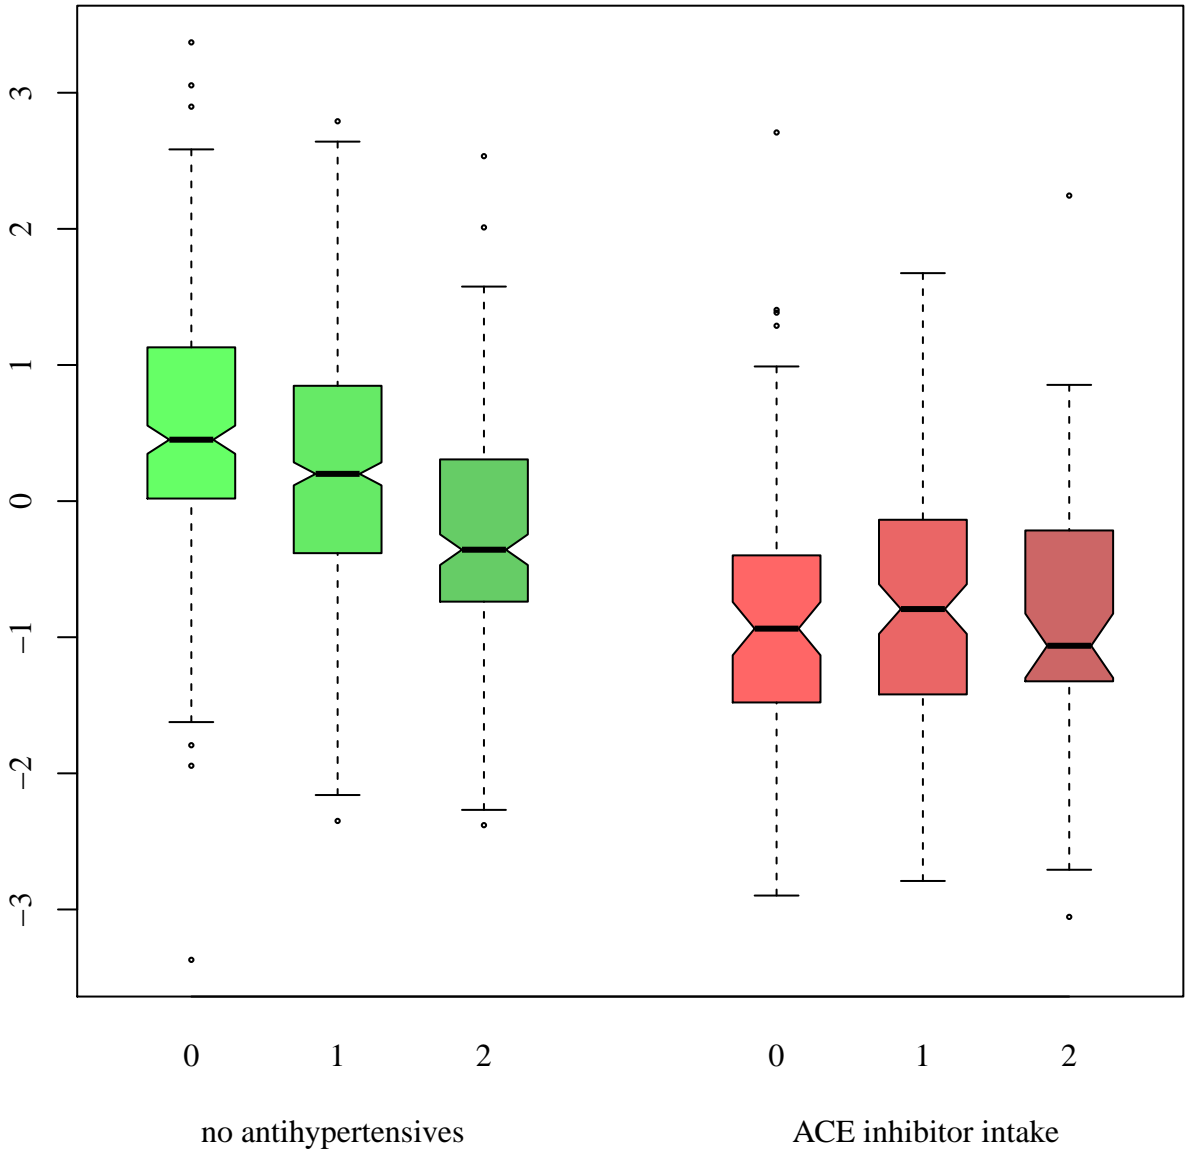

**X14205 – rs4344**



**X14208 – rs4344**



**X14304 – rs4344**



**aspartylphenylalanine – rs4351**

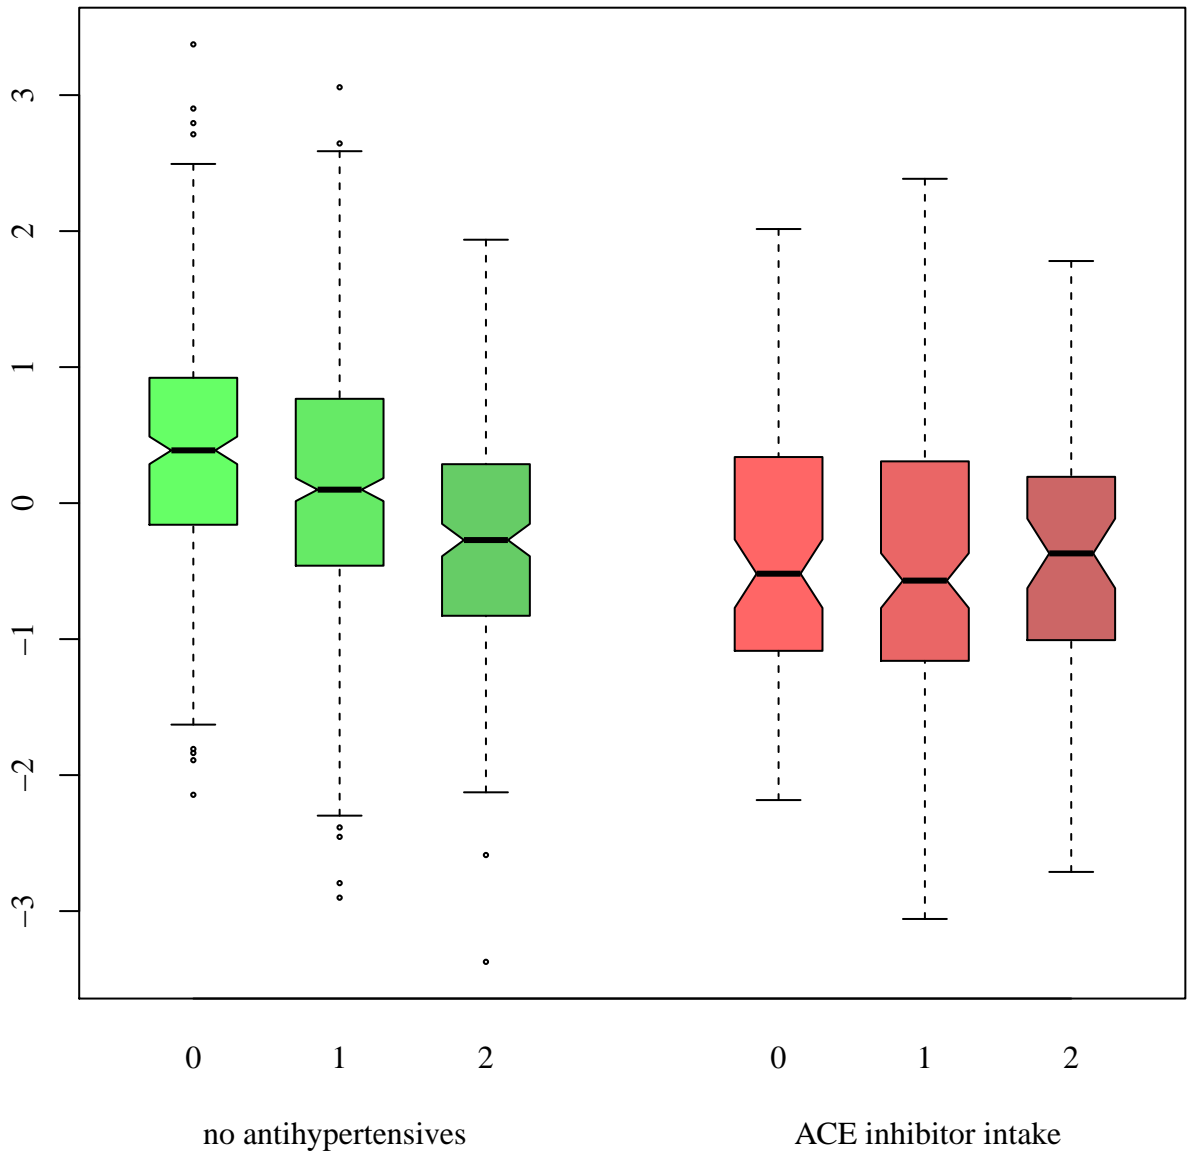

**aspartylphenylalanine/HWESASXX – rs4351**

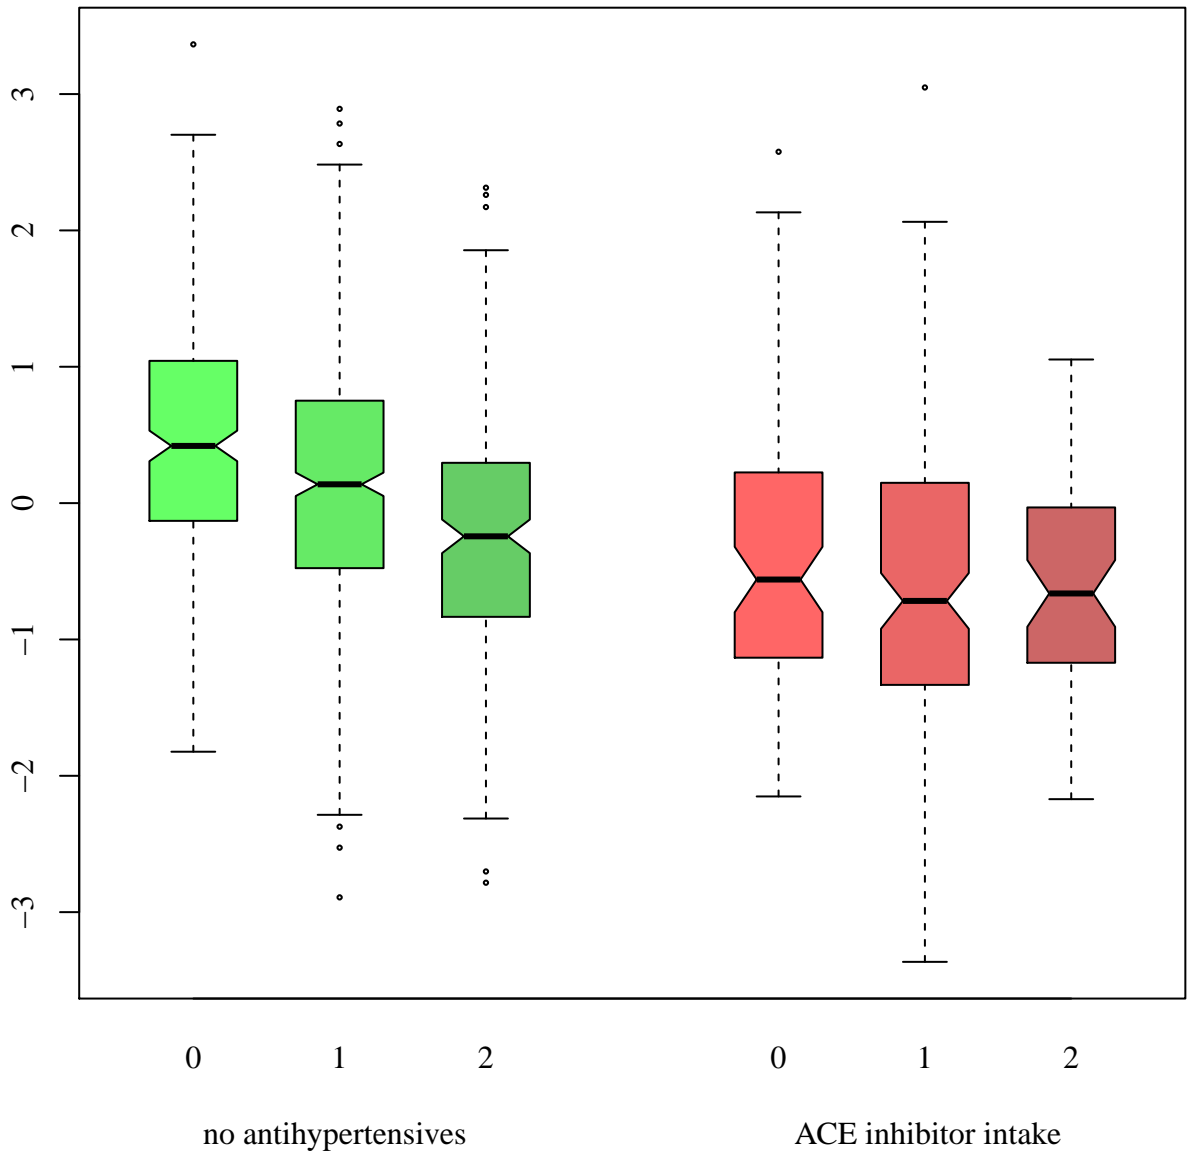

aspartylphenylalanine/X11805 – rs4351

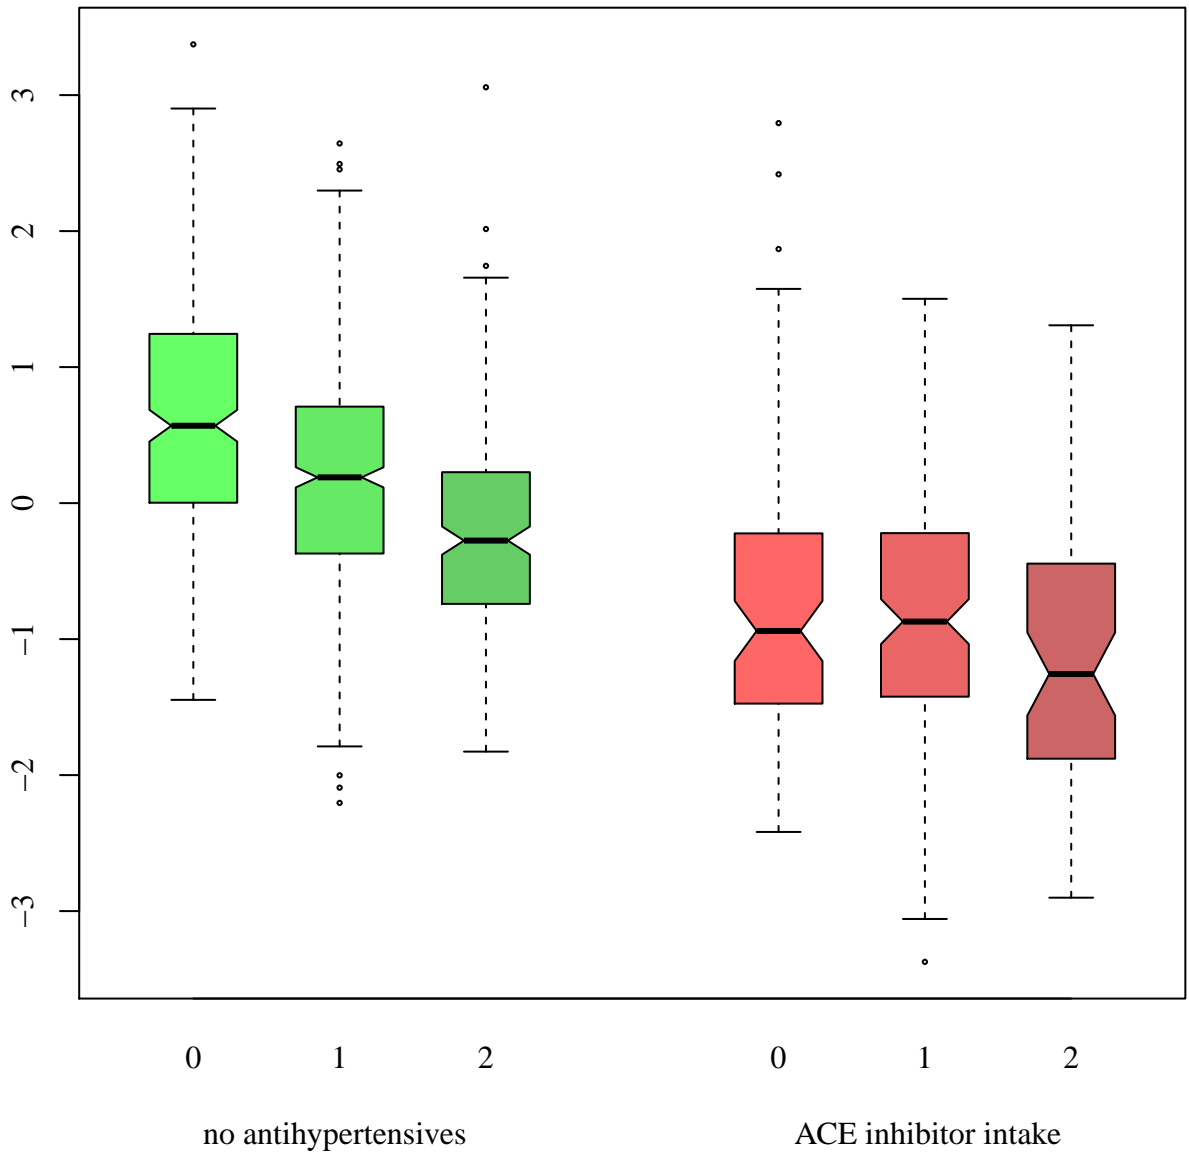

aspartylphenylalanine/X14450 – rs4351

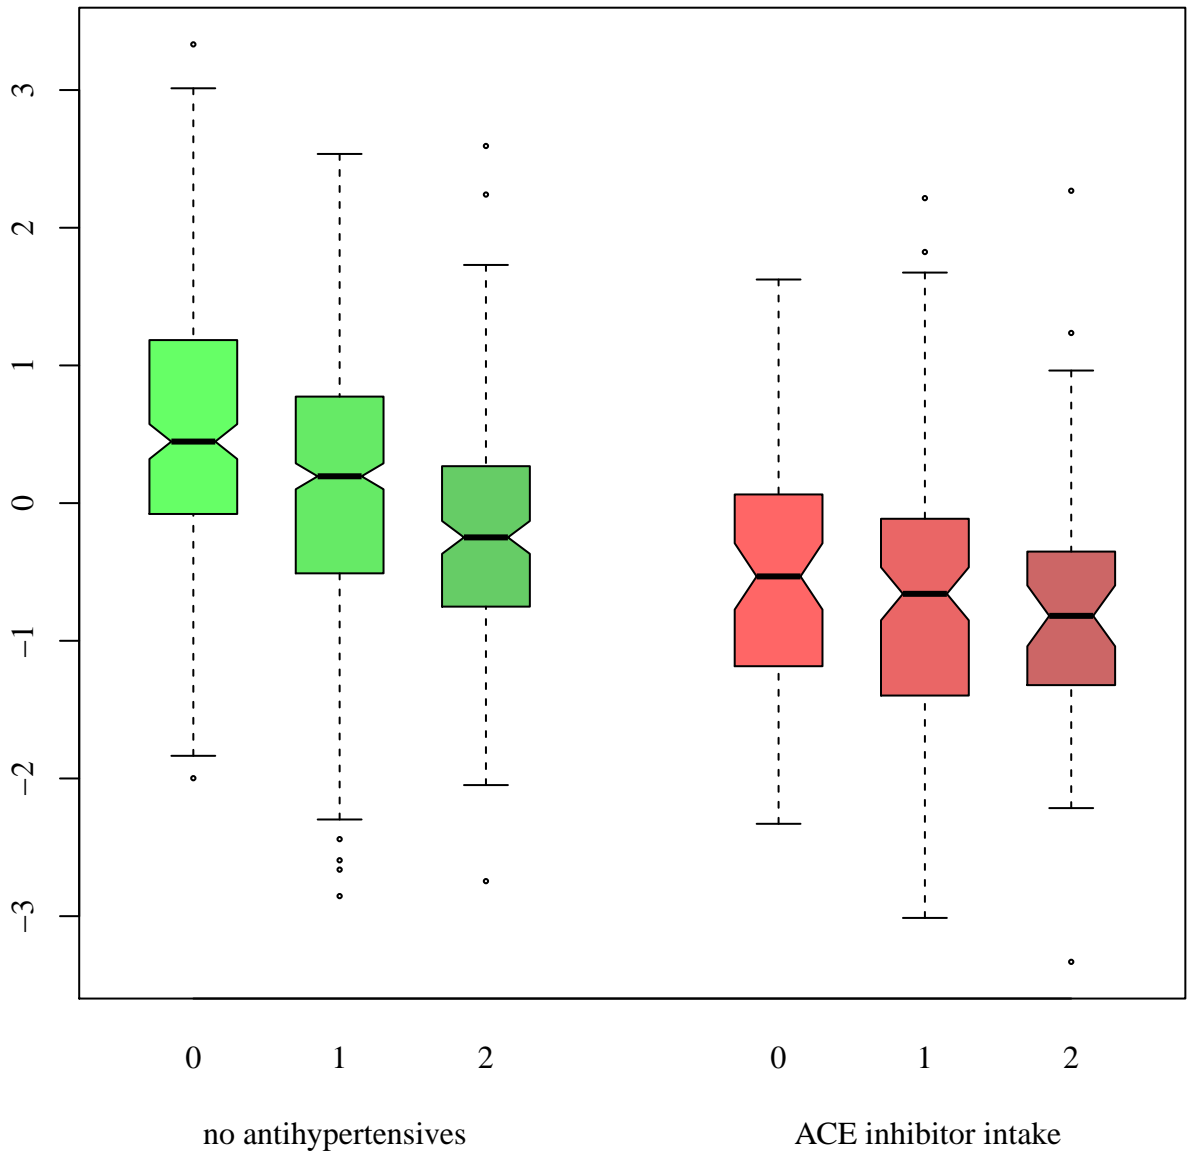



**X14086 – rs4351**

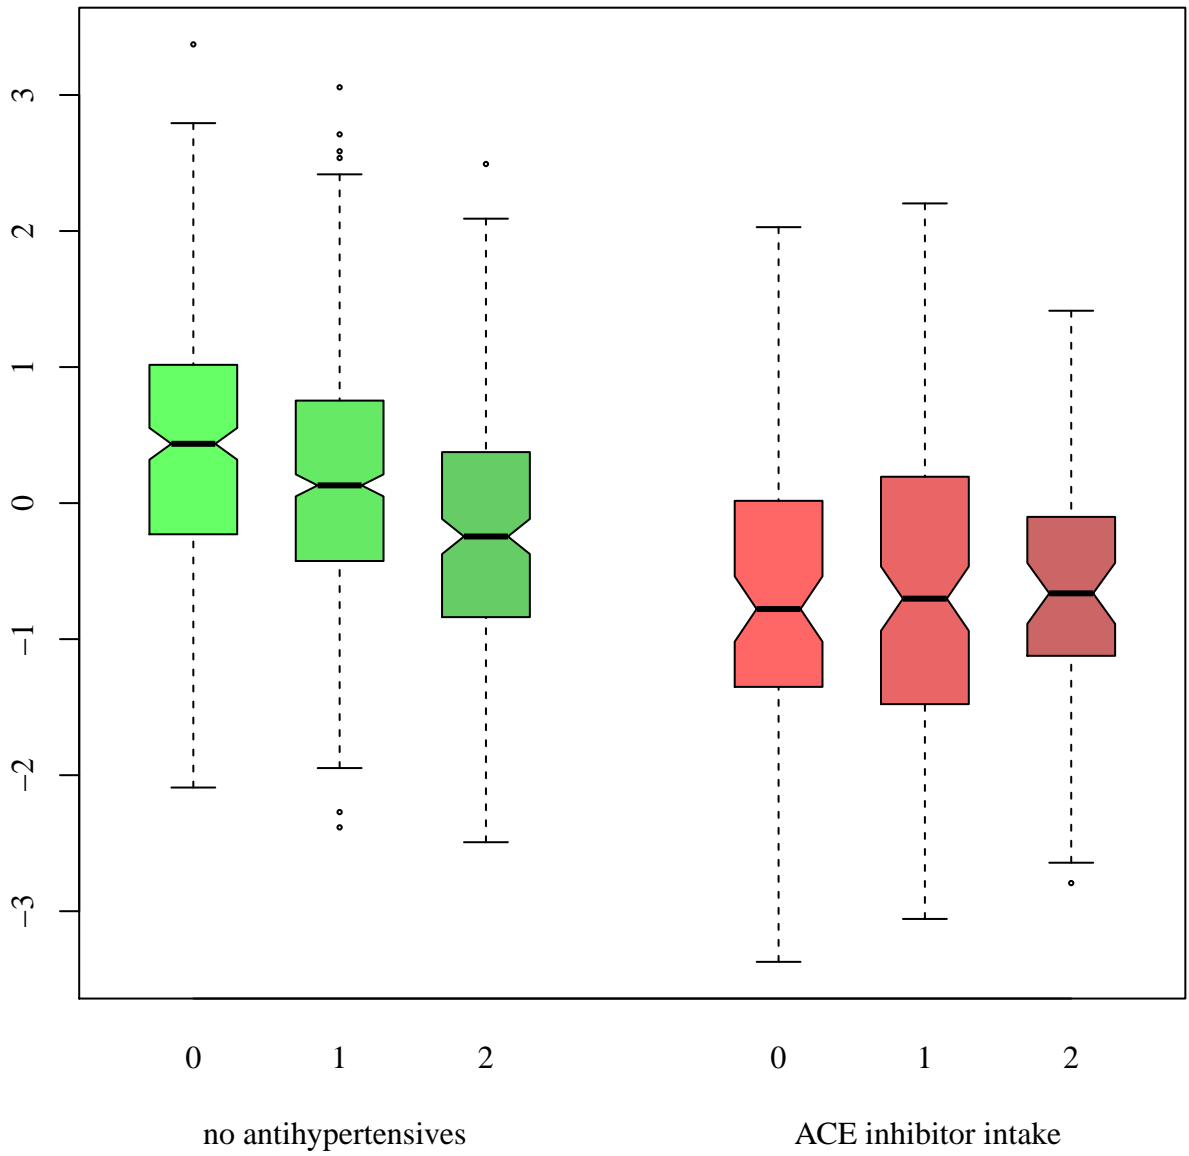

**X14189 – rs4351**

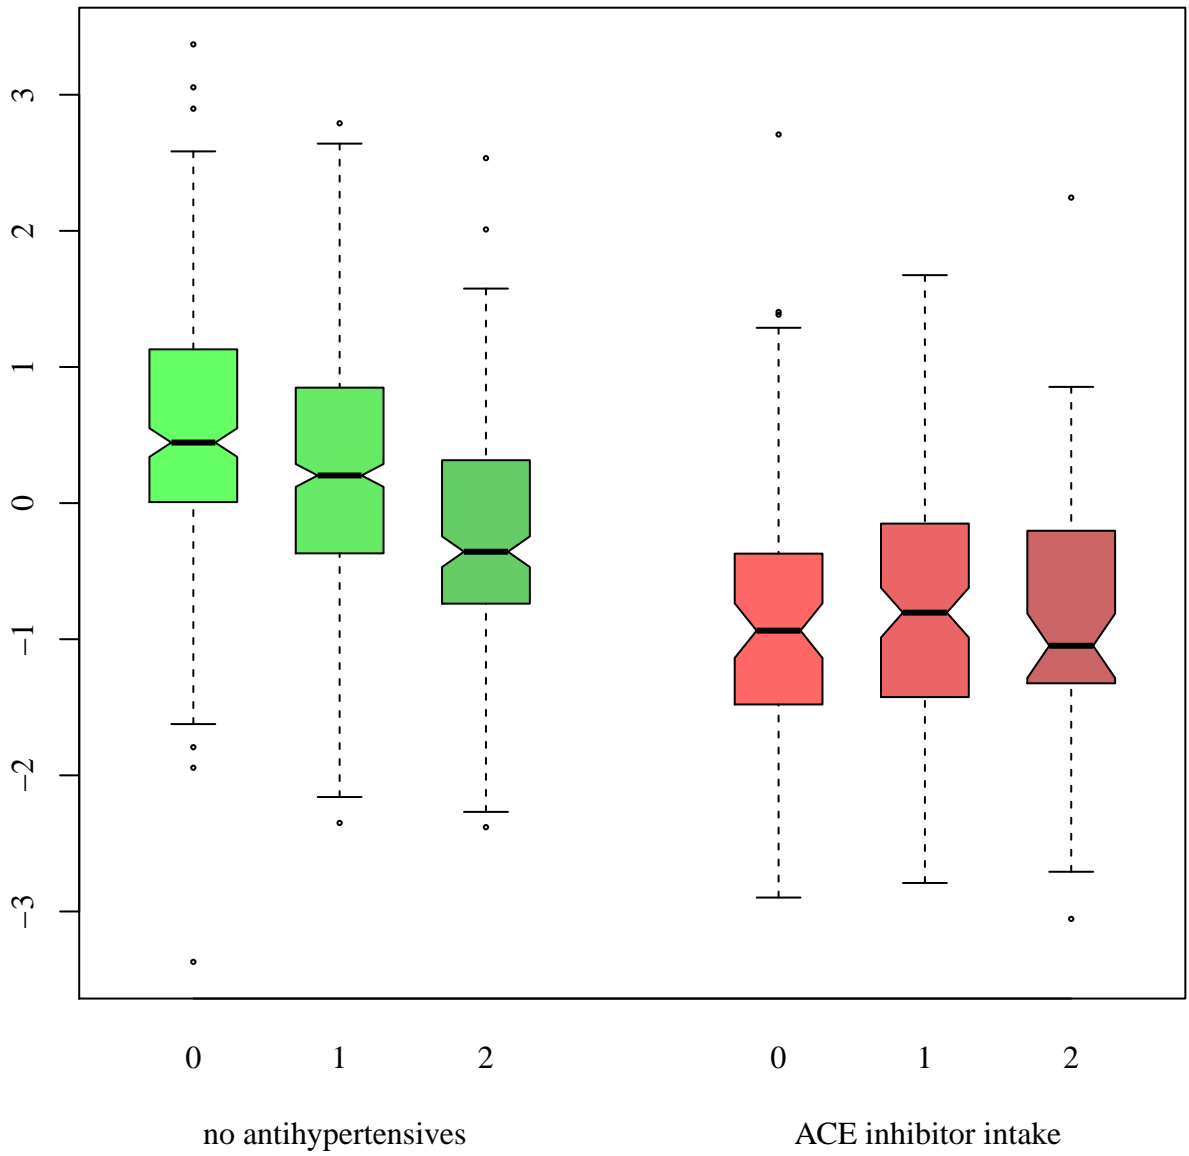

**X14205 – rs4351**

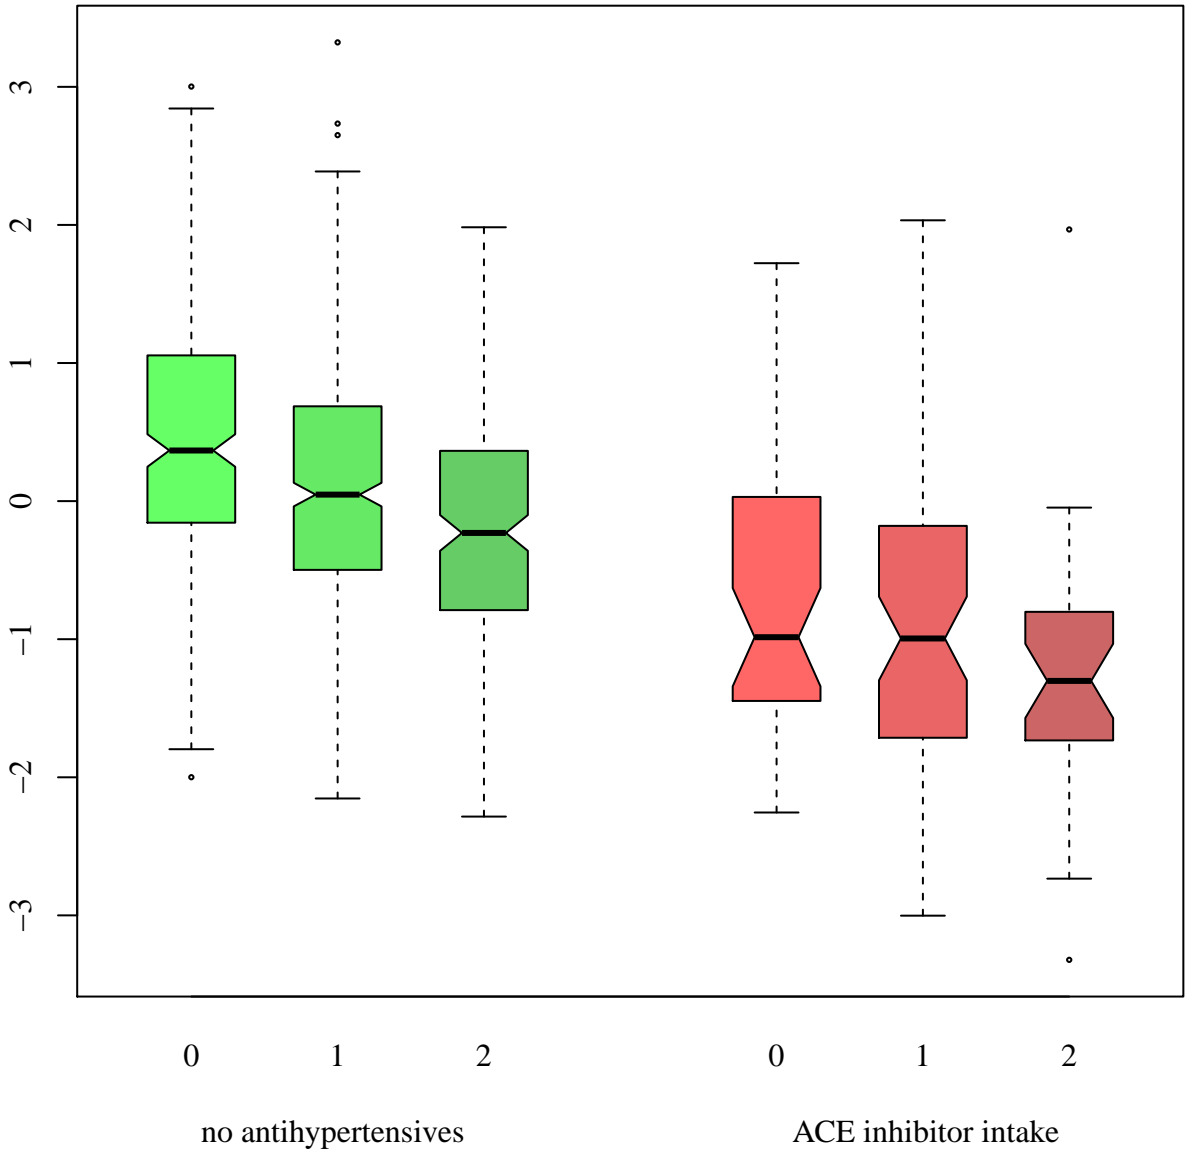

**X14208 – rs4351**

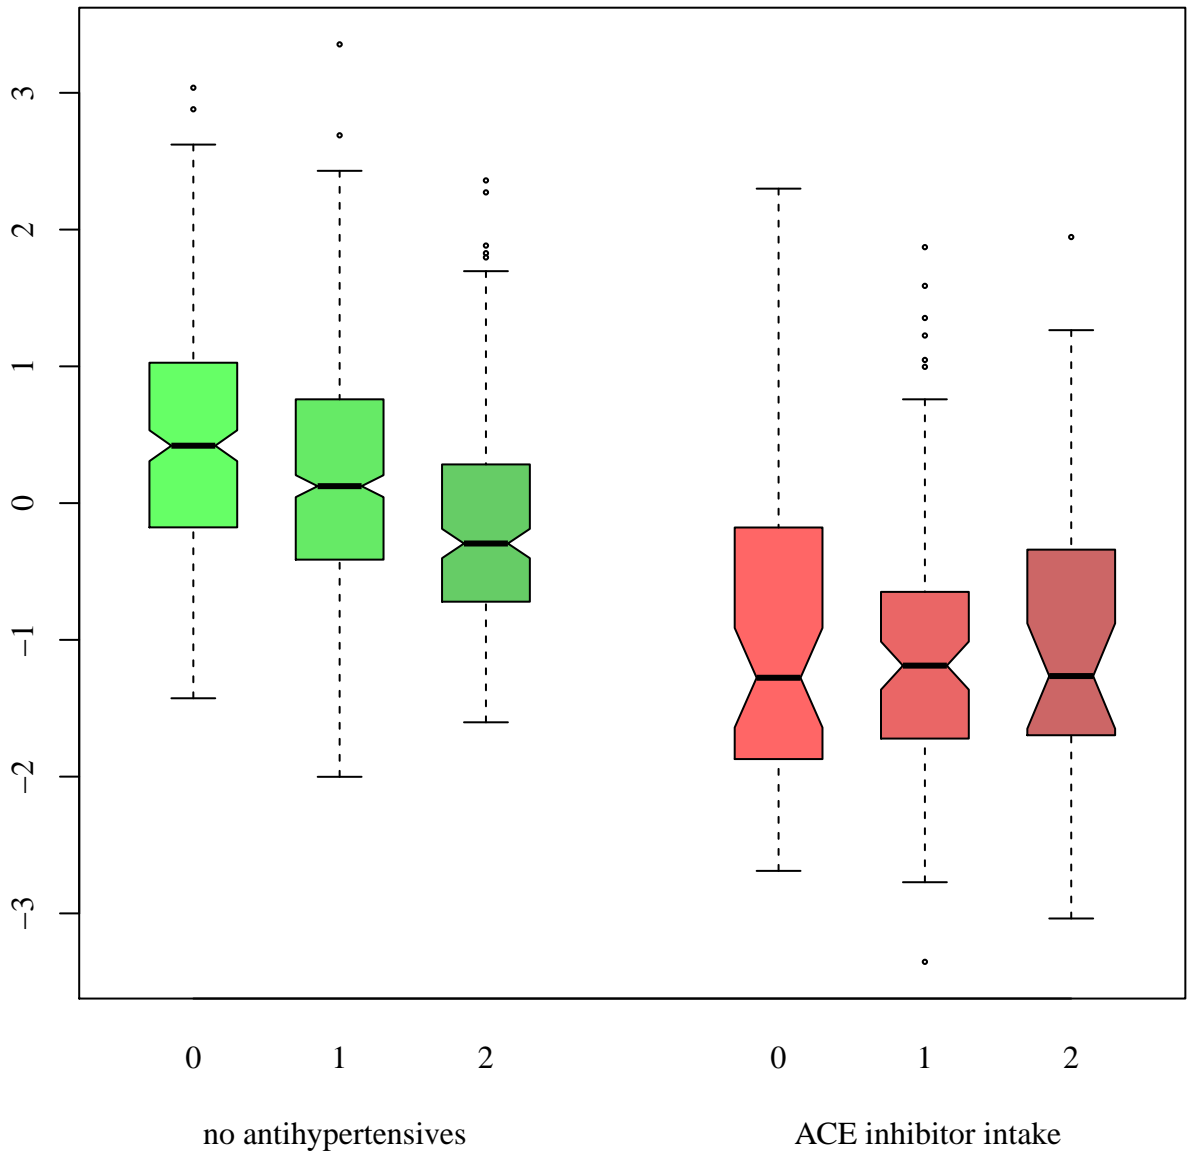

**X14304 – rs4351**

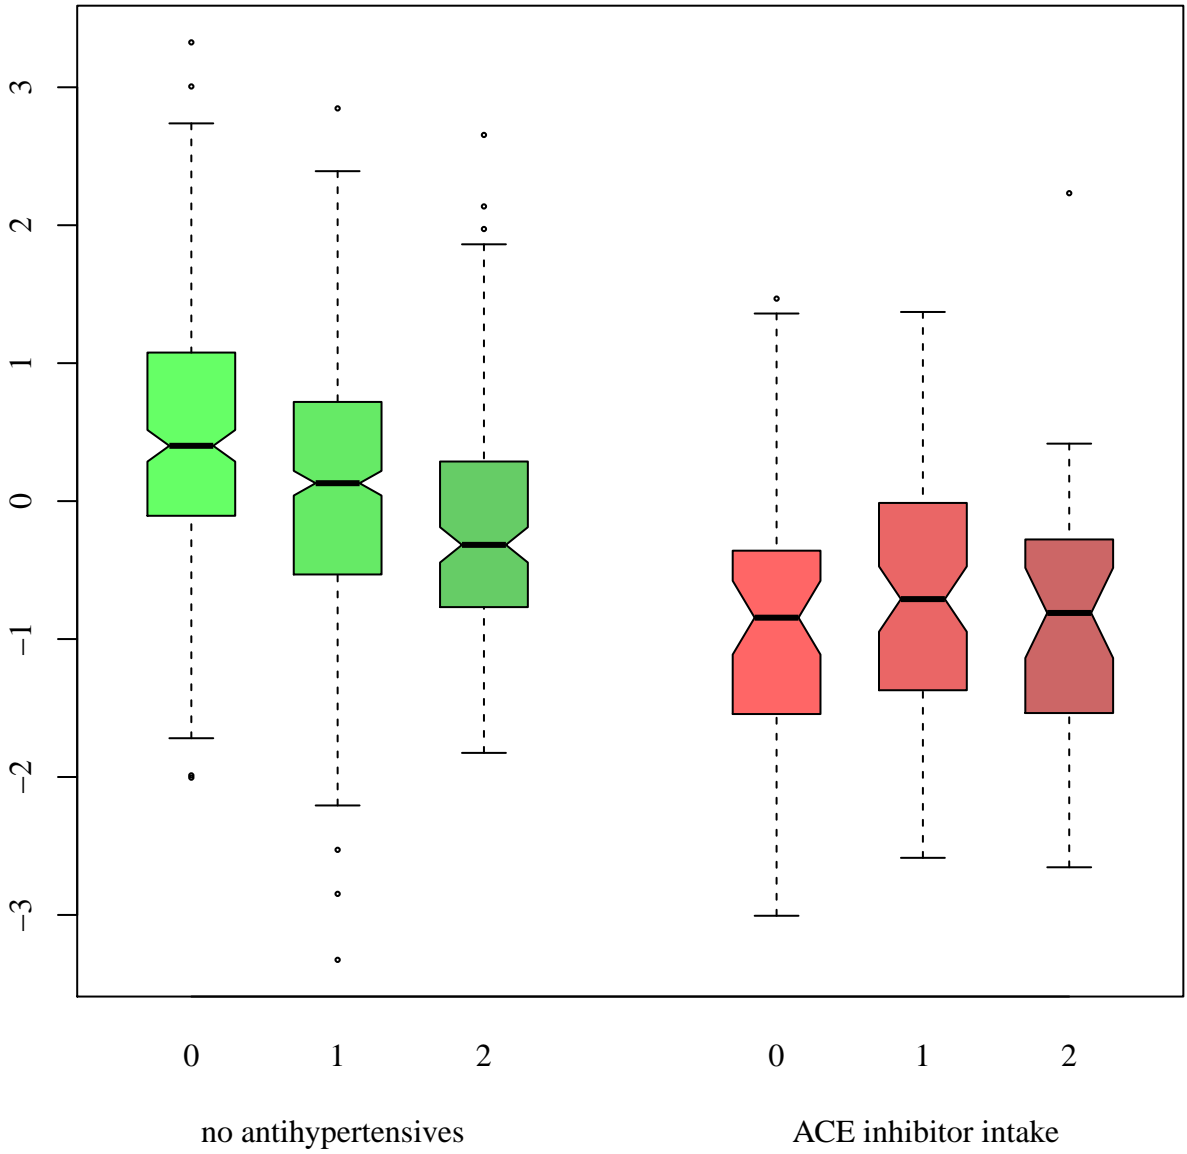

**aspartylphenylalanine – rs4353**

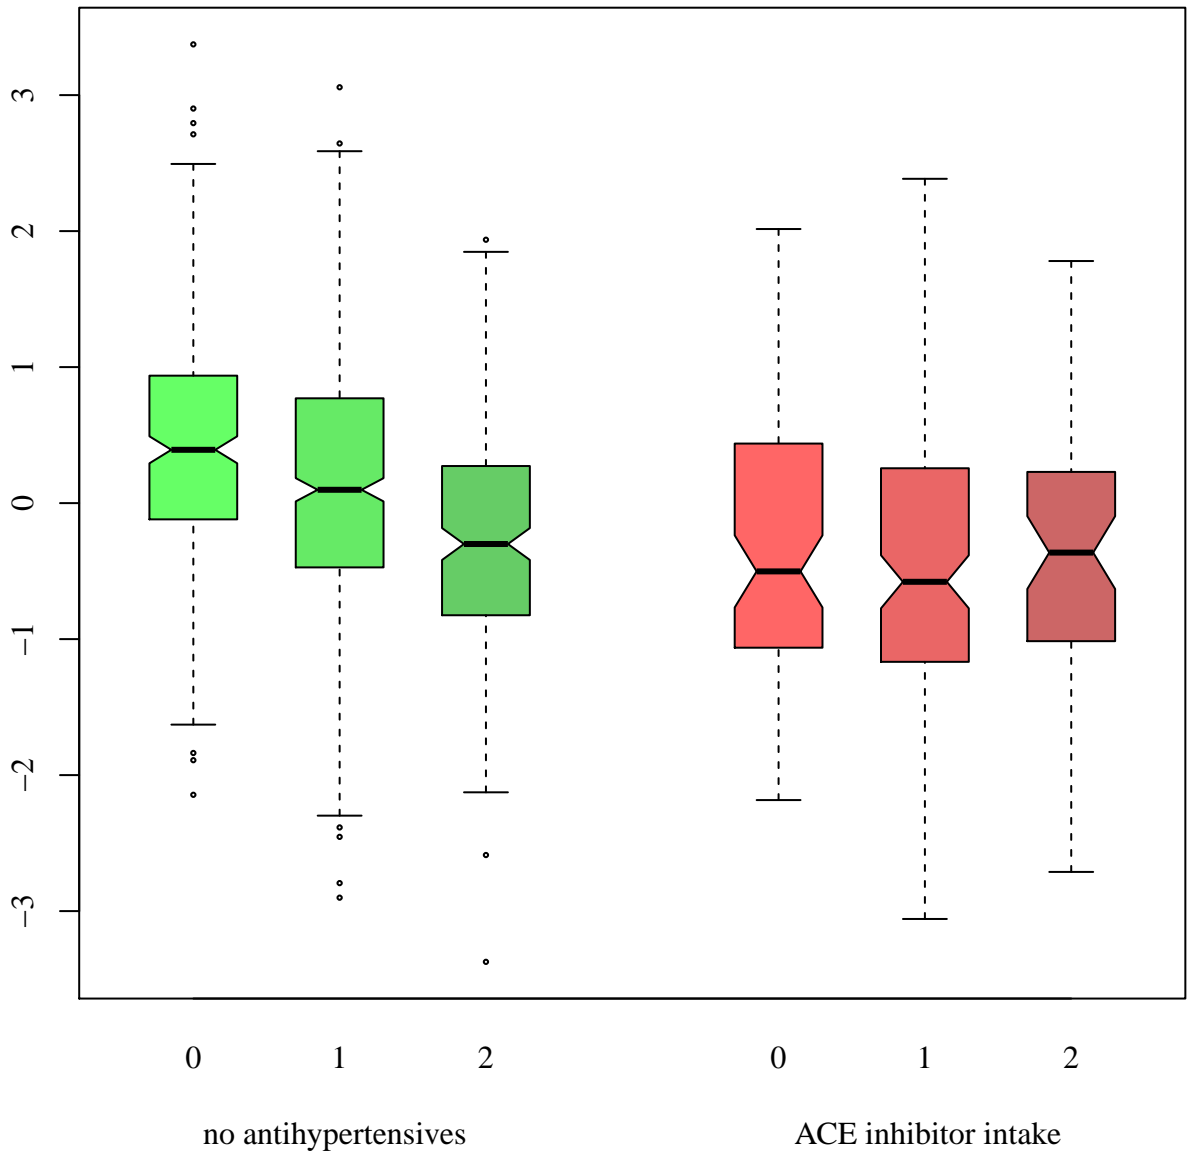

**aspartylphenylalanine/HWESASXX – rs4353**

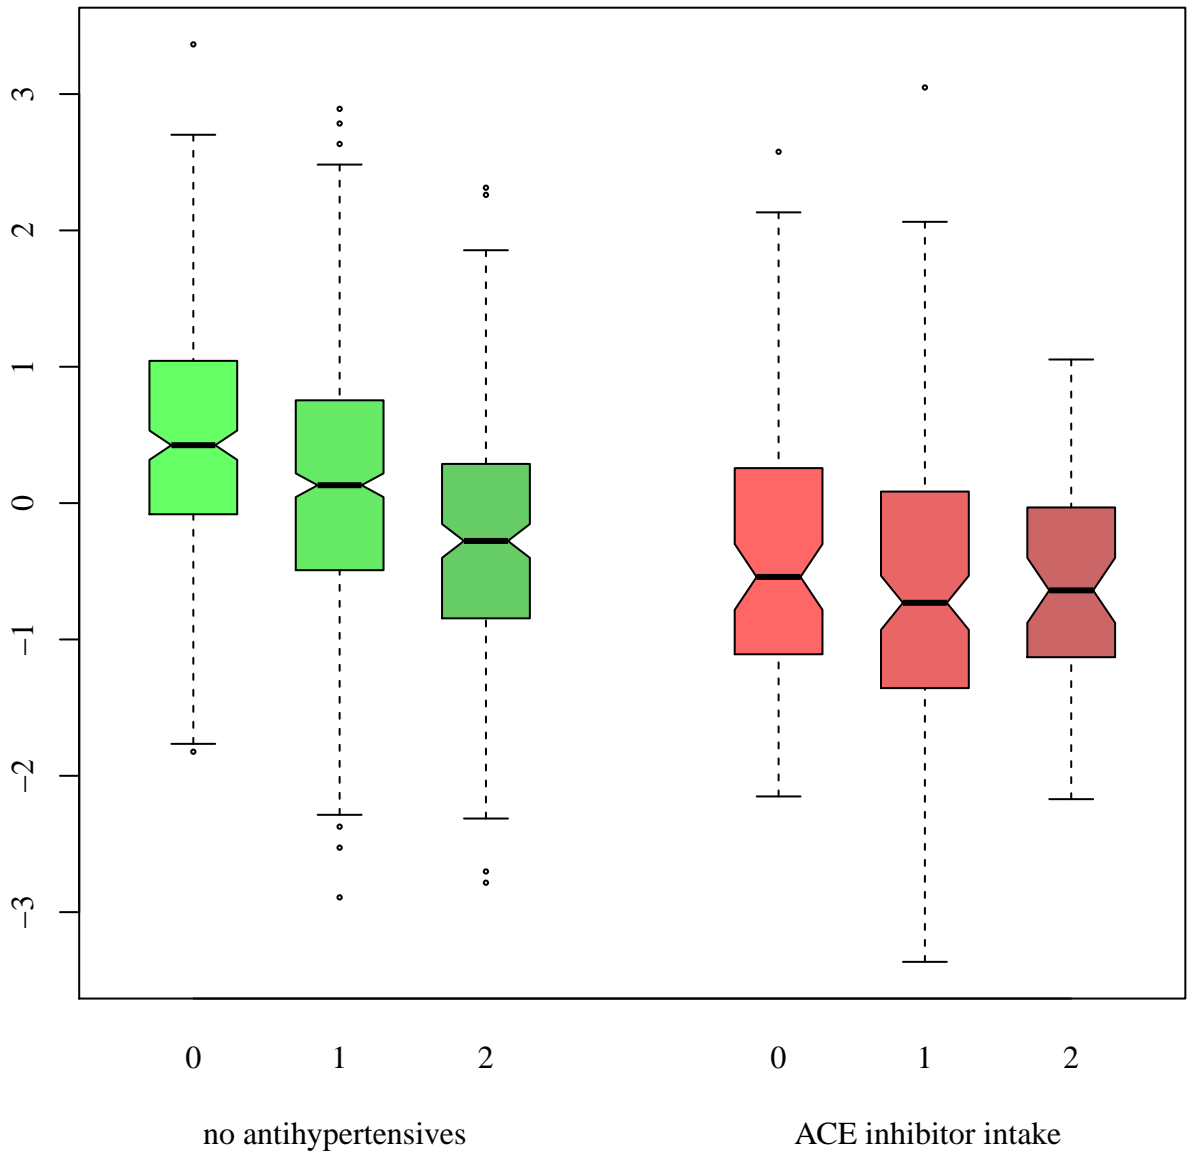

aspartylphenylalanine/X11805 – rs4353

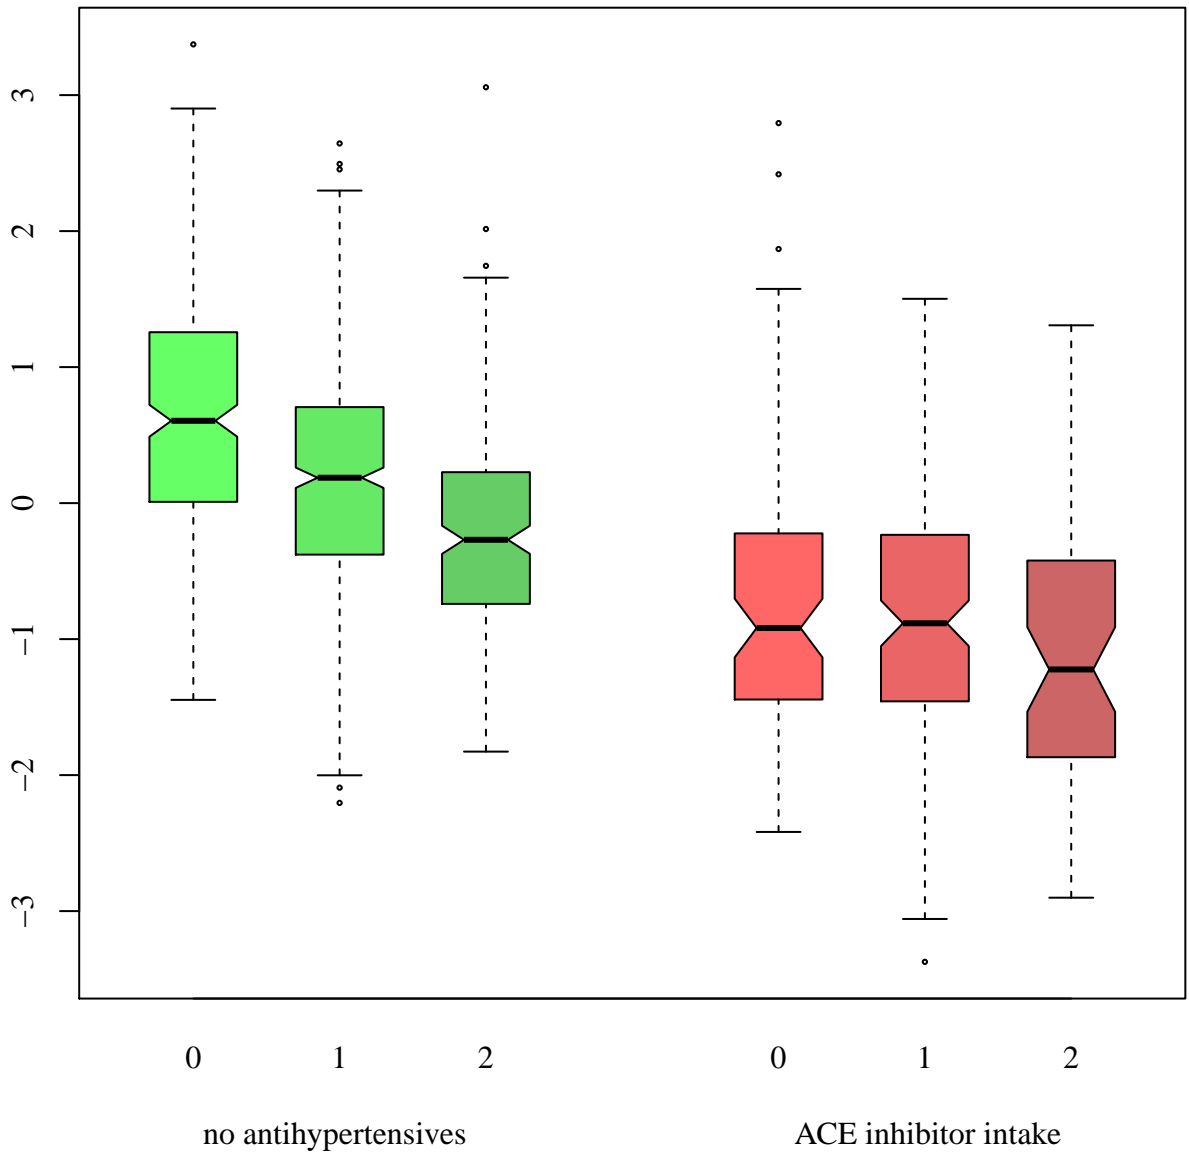



aspartylphenylalanine/X14450 – rs4353

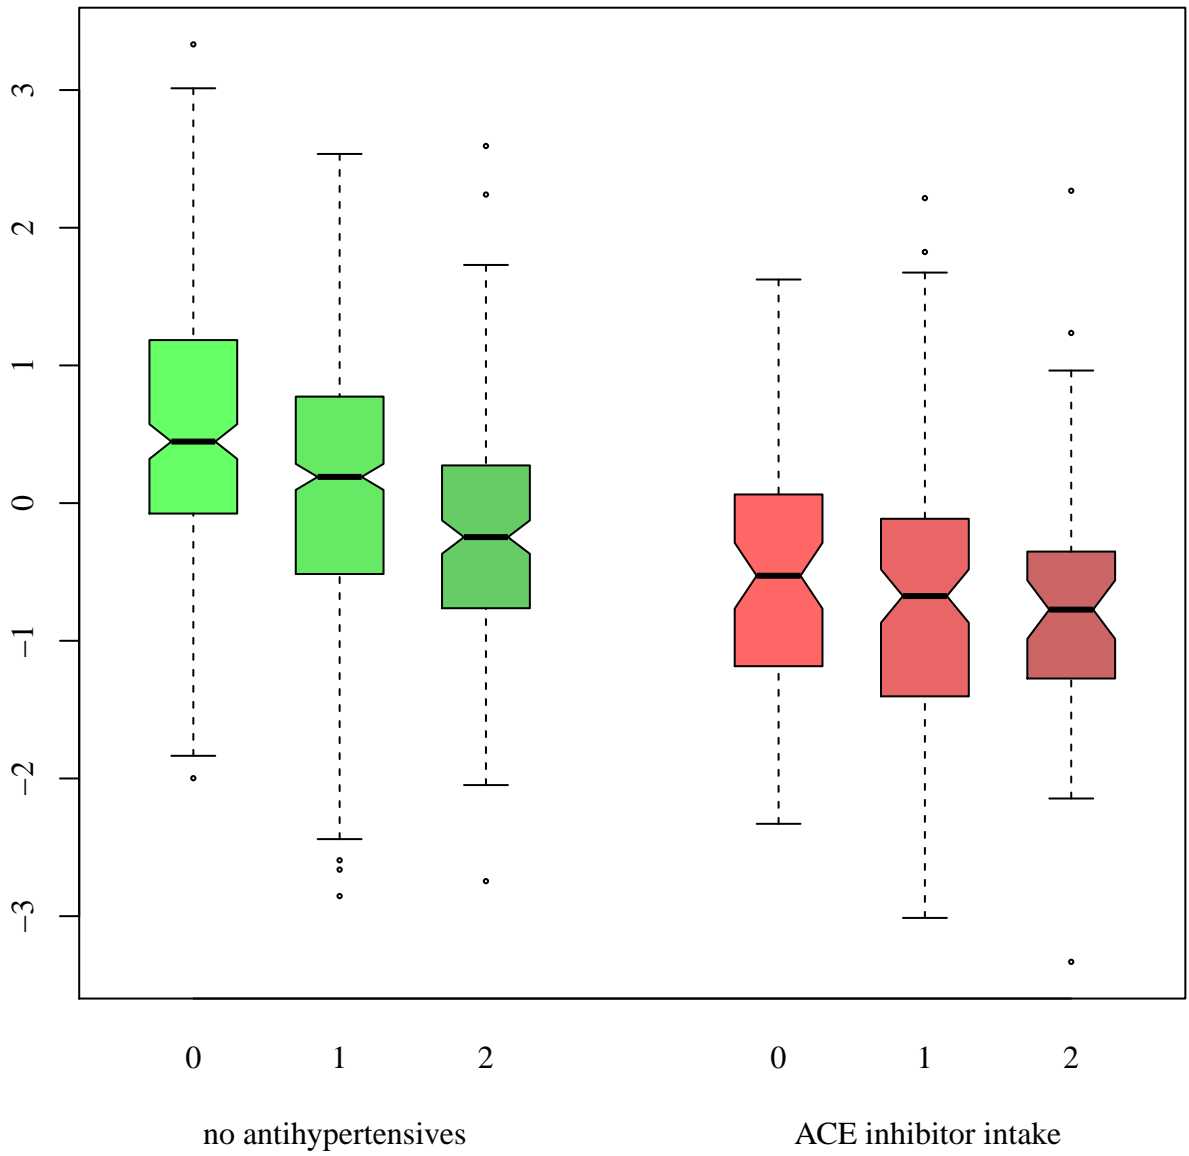

**X14086 – rs4353**

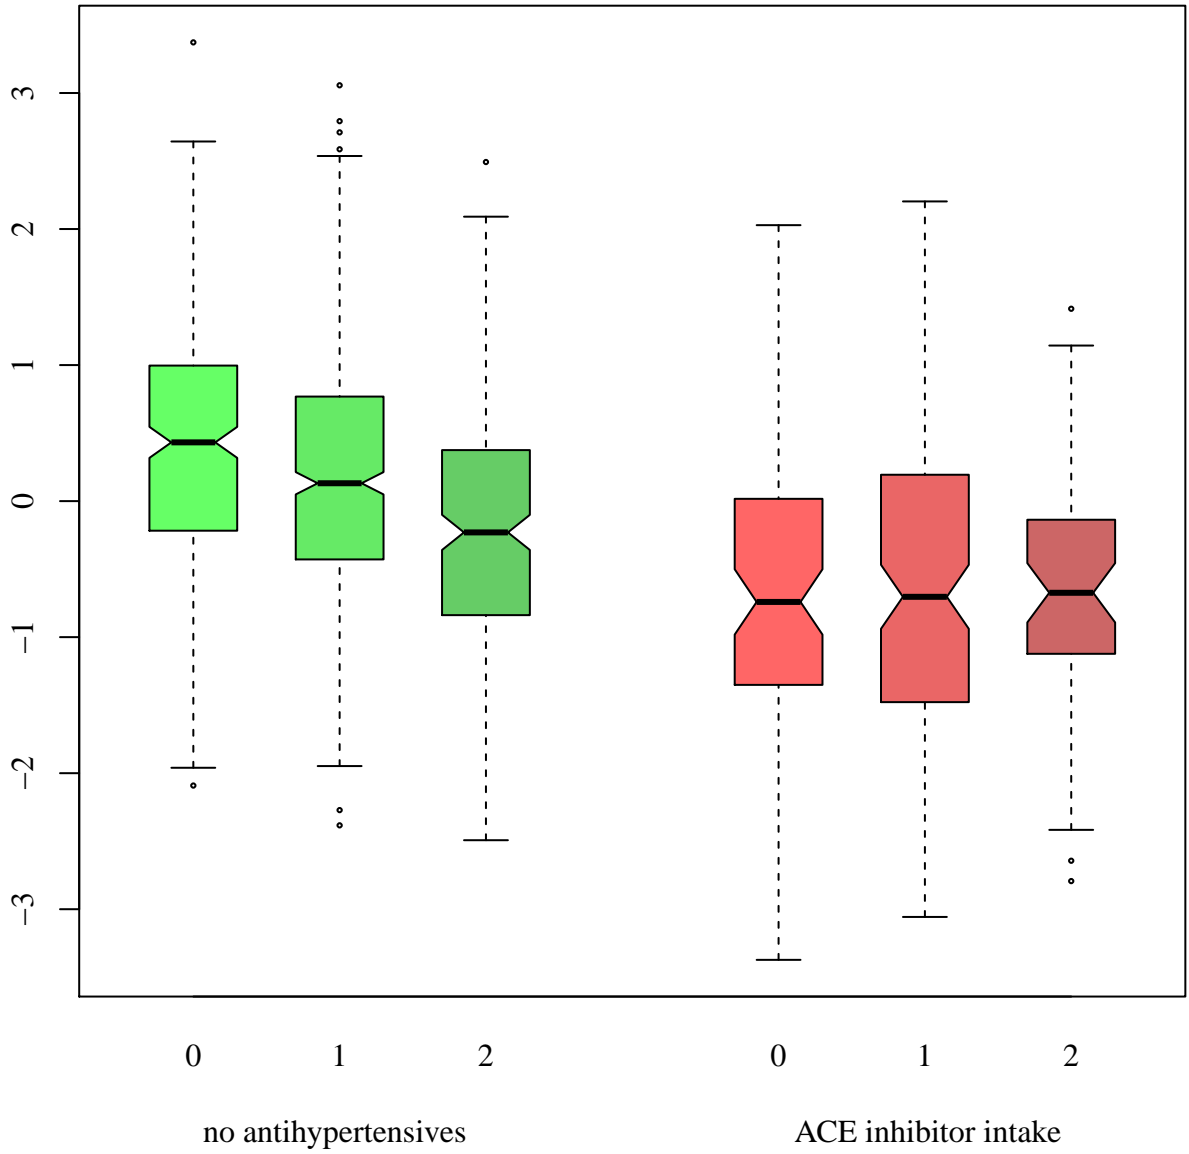

**X14189 – rs4353**

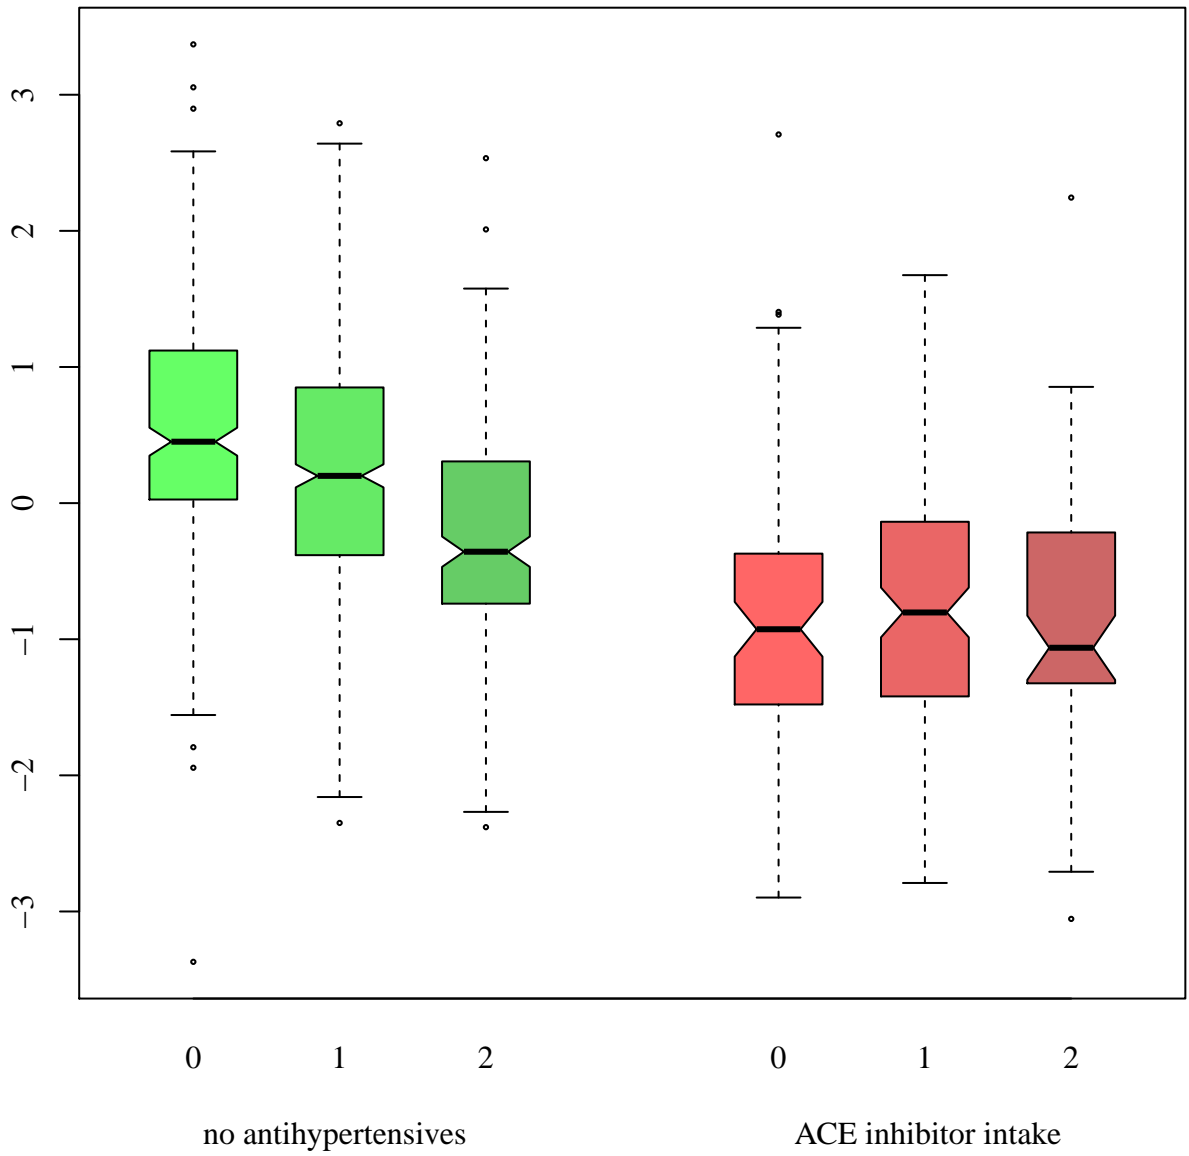

**X14205 – rs4353**

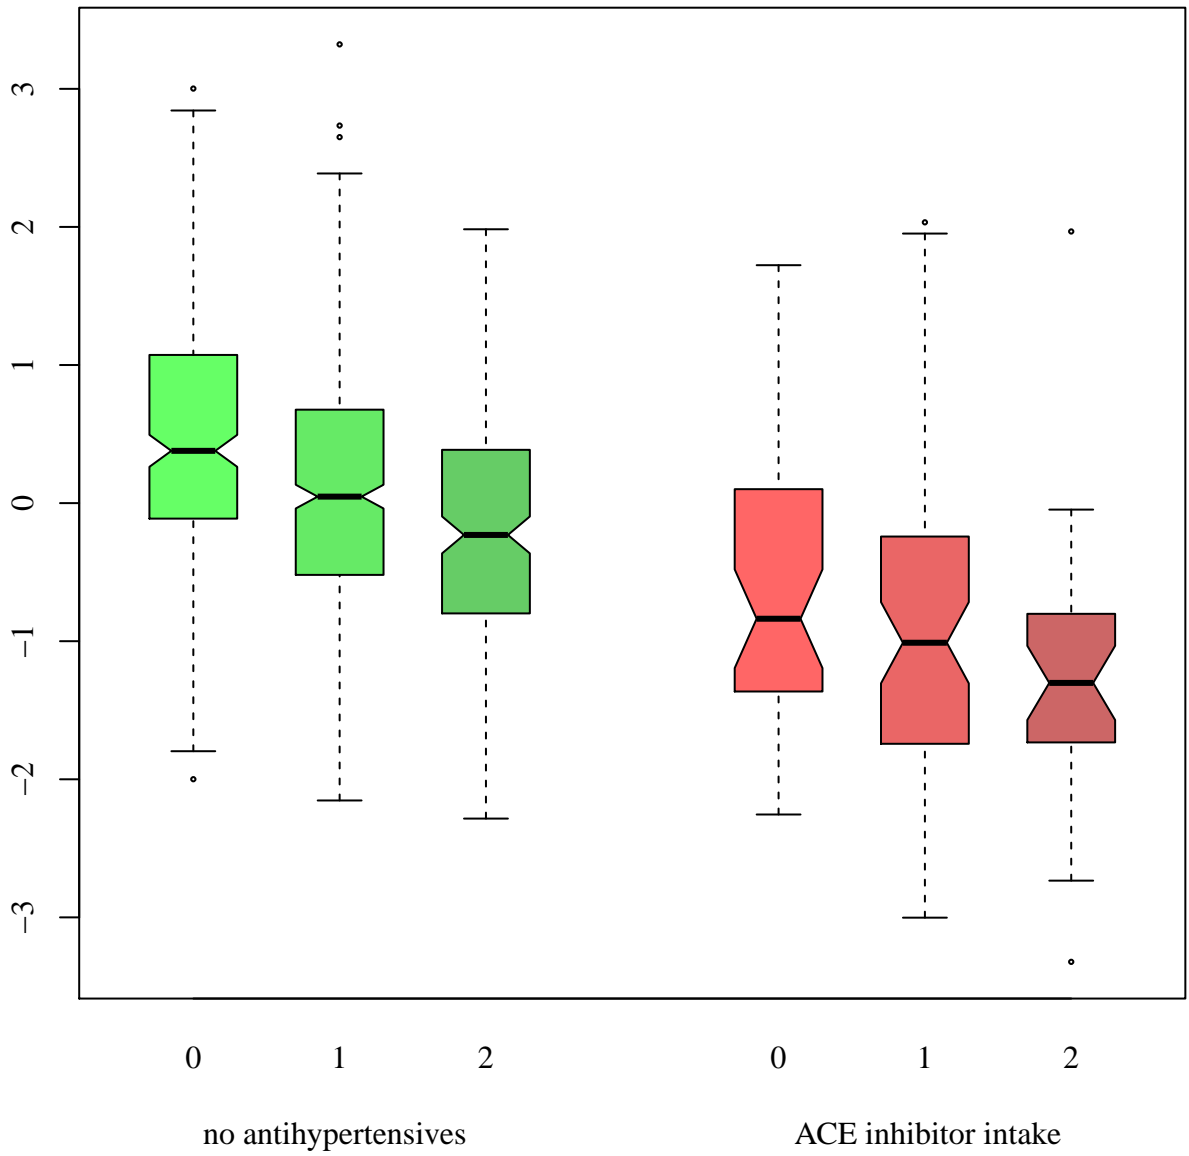

**X14208 – rs4353**

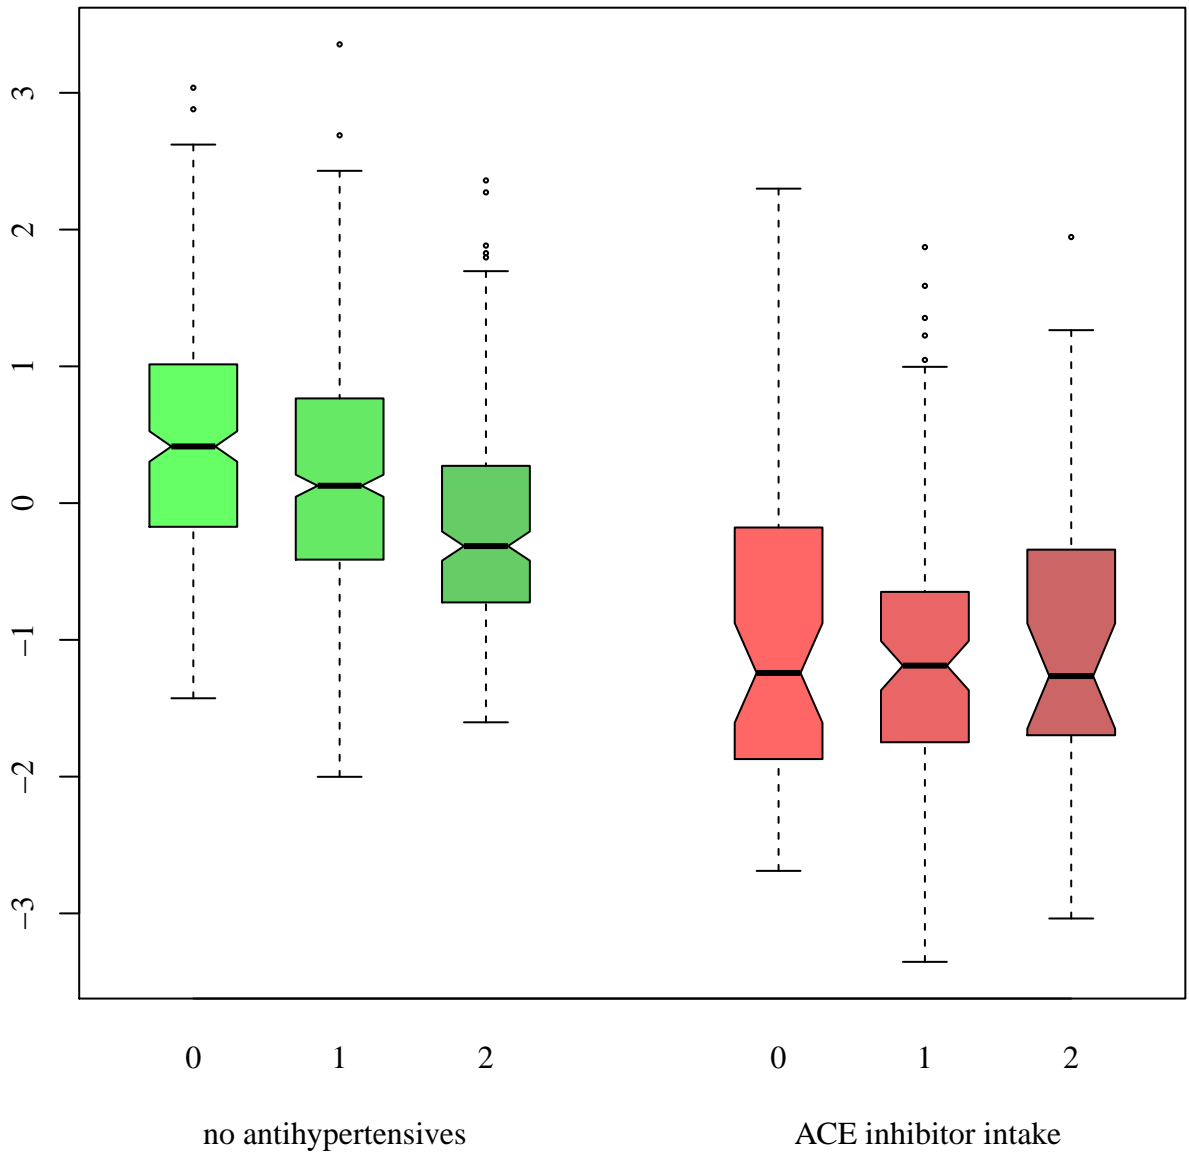

**X14304 – rs4353**

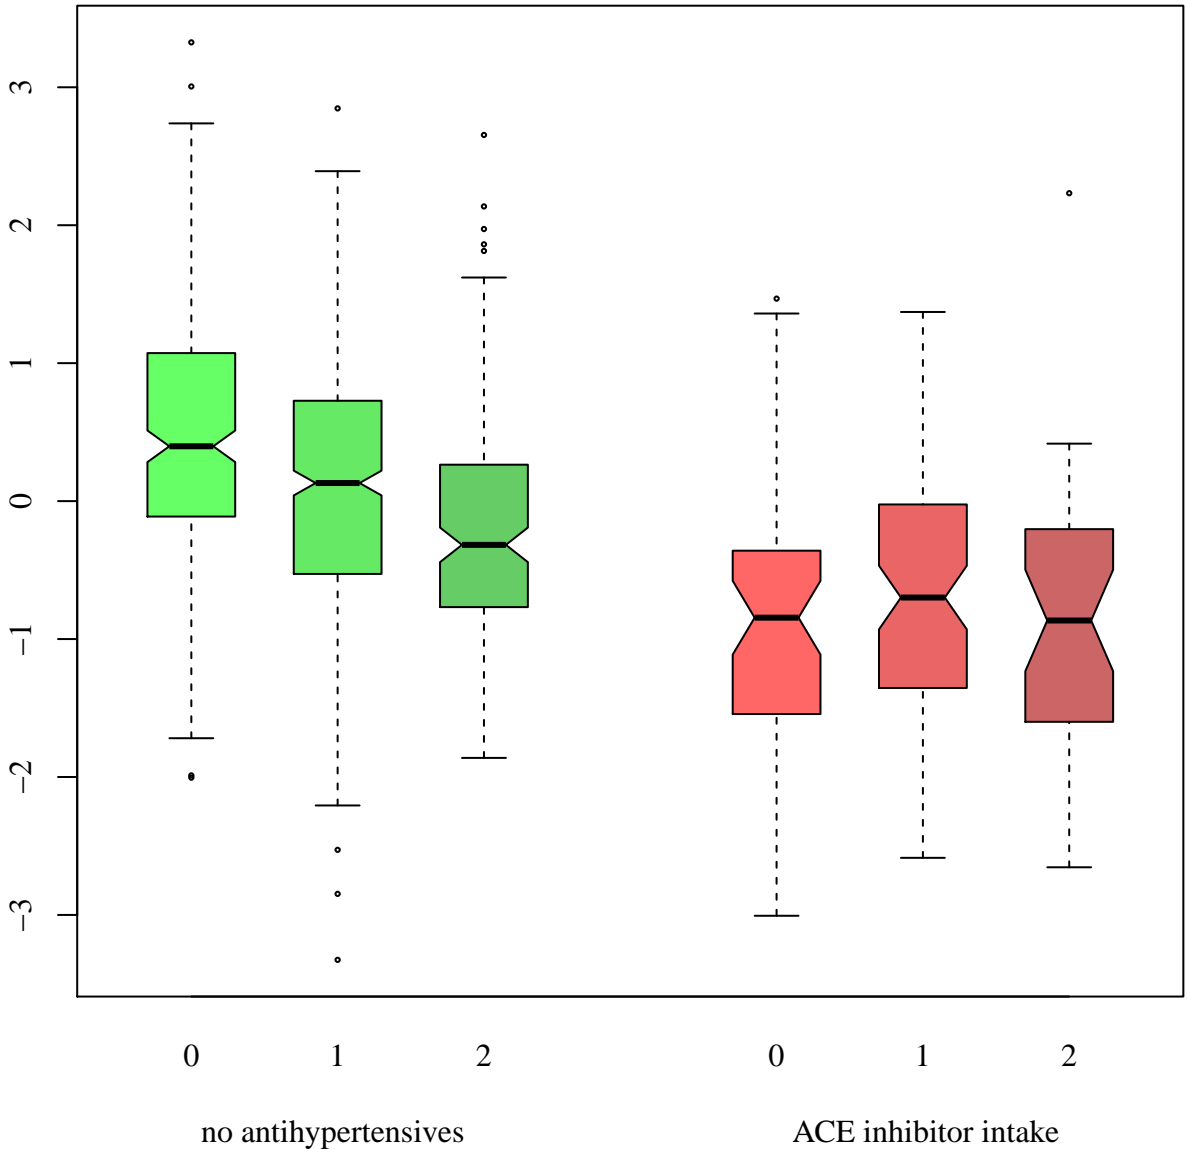

**aspartylphenylalanine – rs4359**

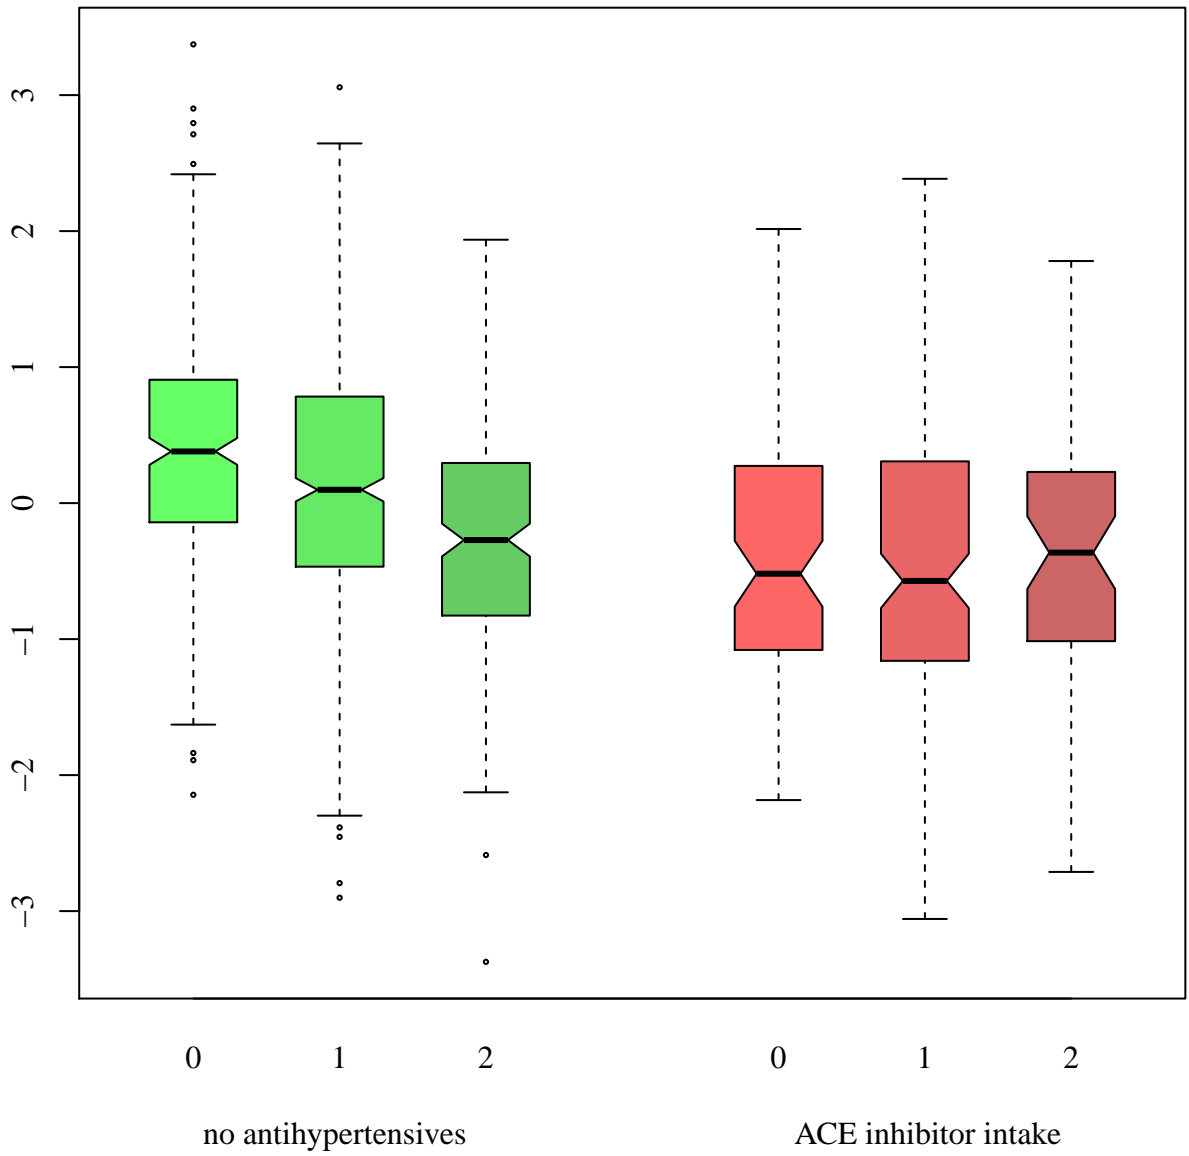

**aspartylphenylalanine/HWESASXX – rs4359**

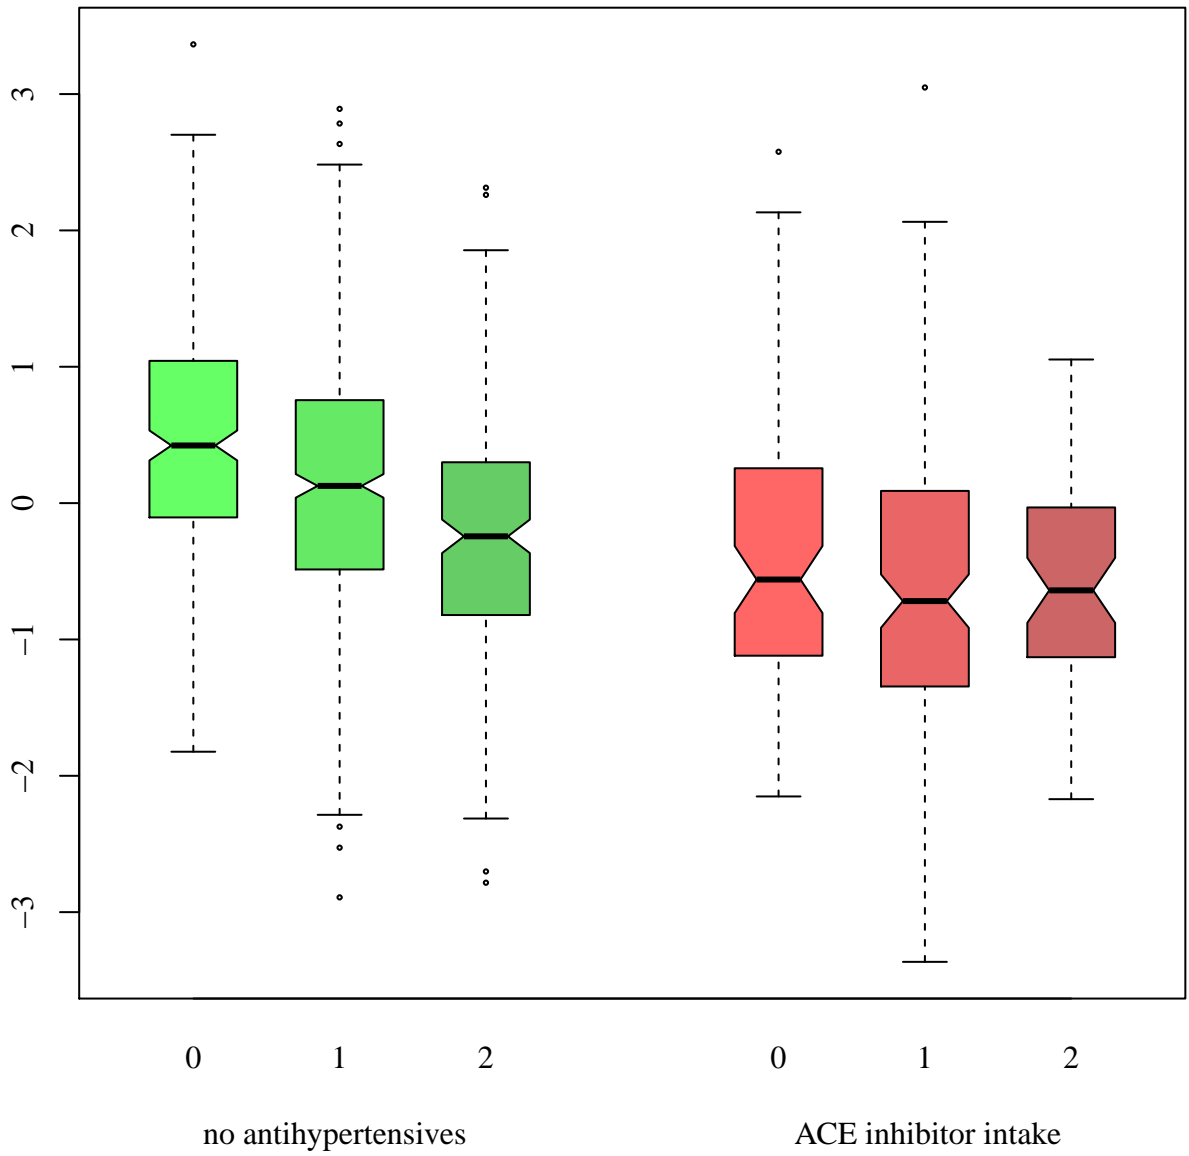



aspartylphenylalanine/X11805 – rs4359

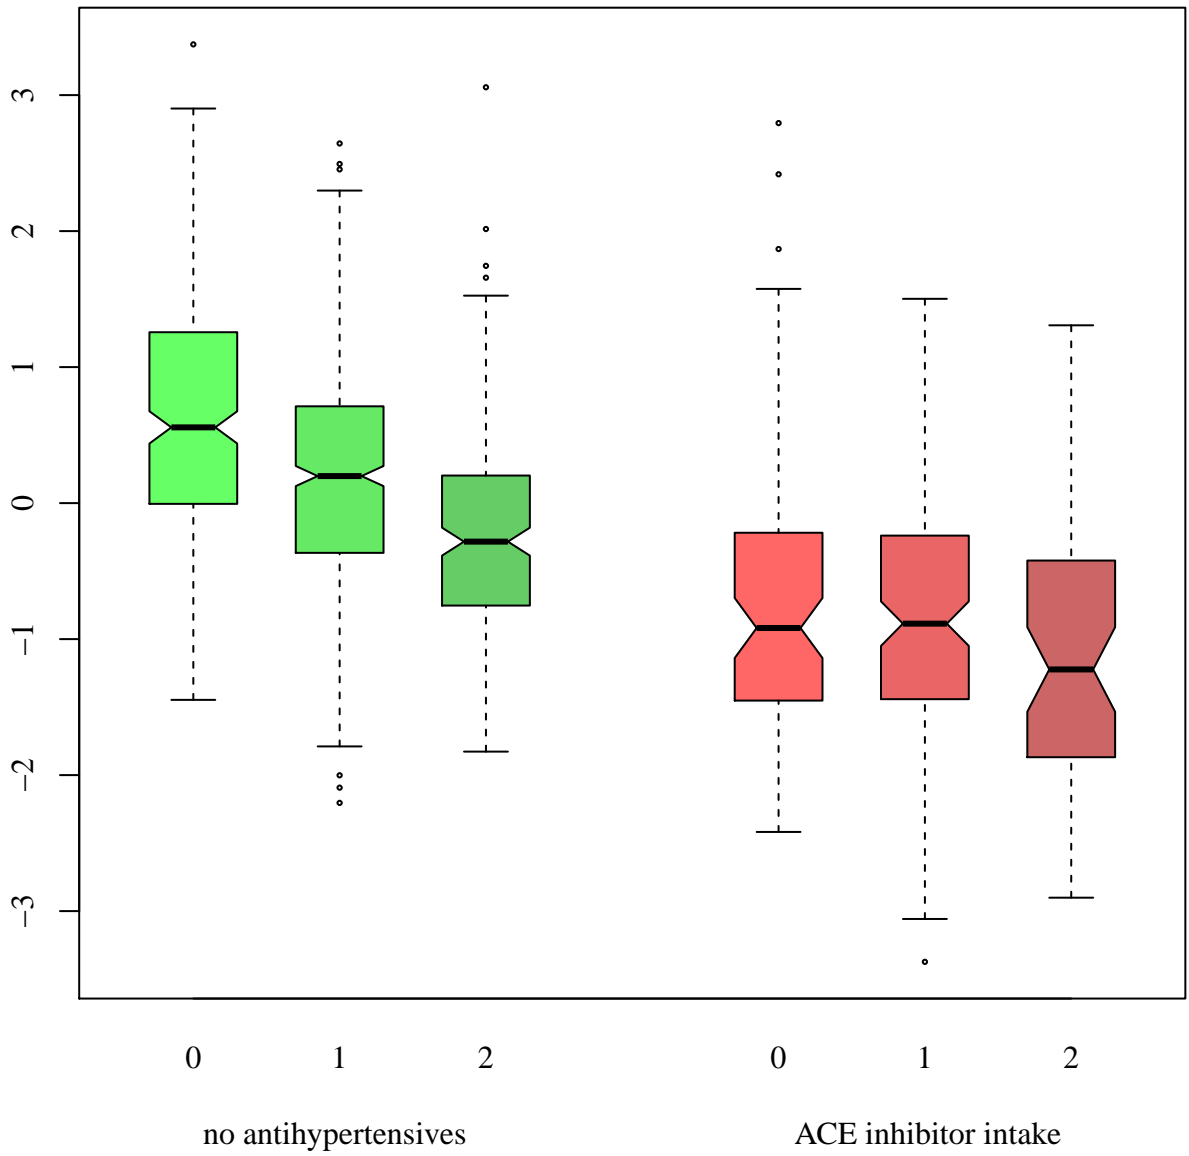

**aspartylphenylalanine/X14450 – rs4359**

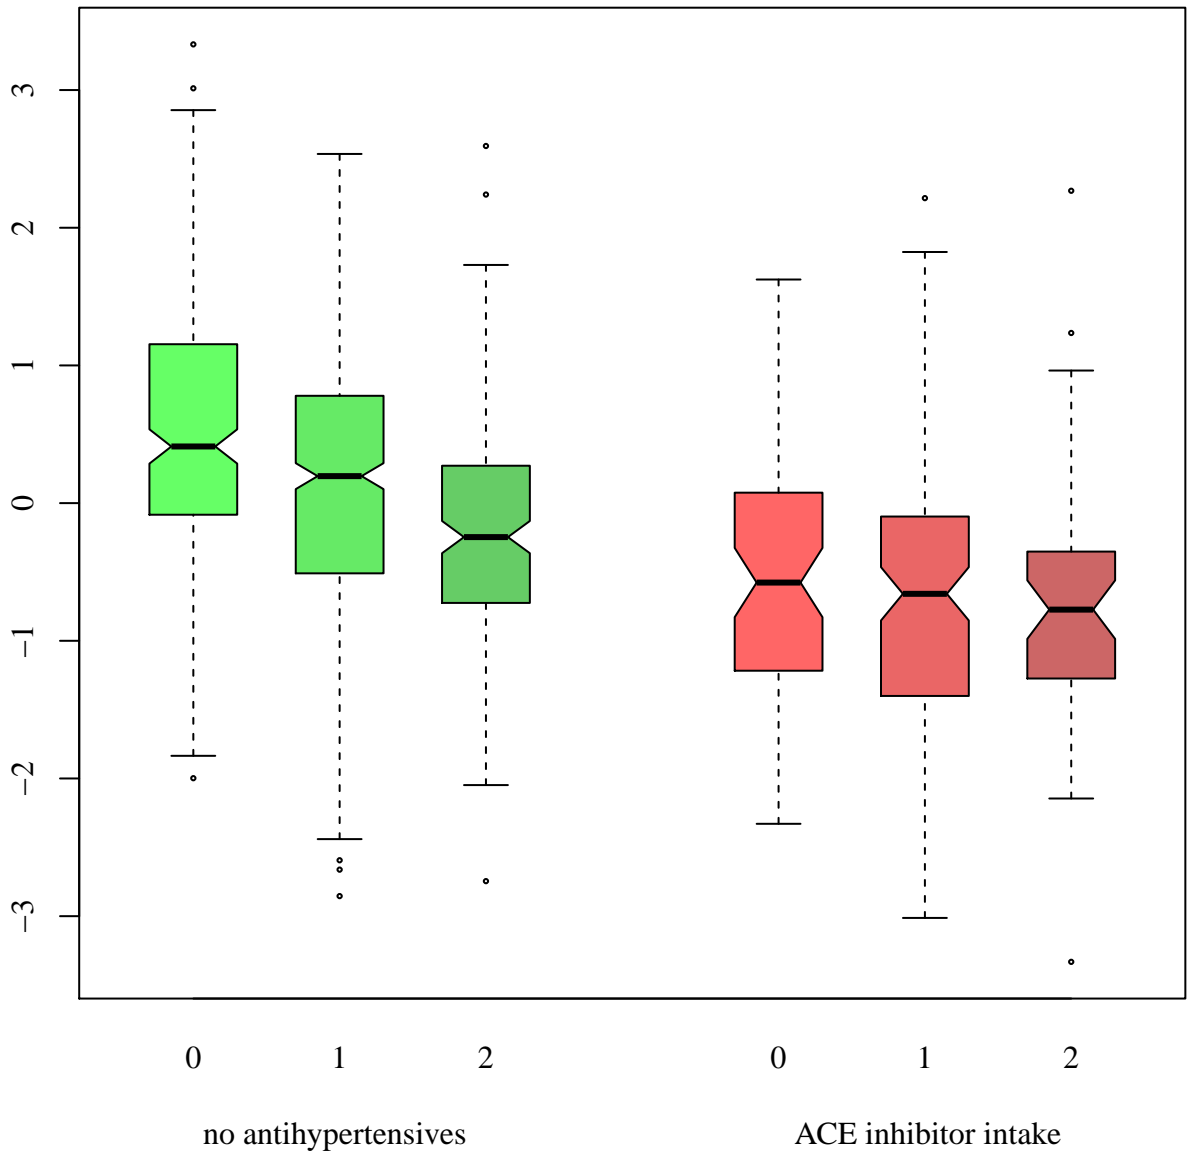

**X14086 – rs4359**

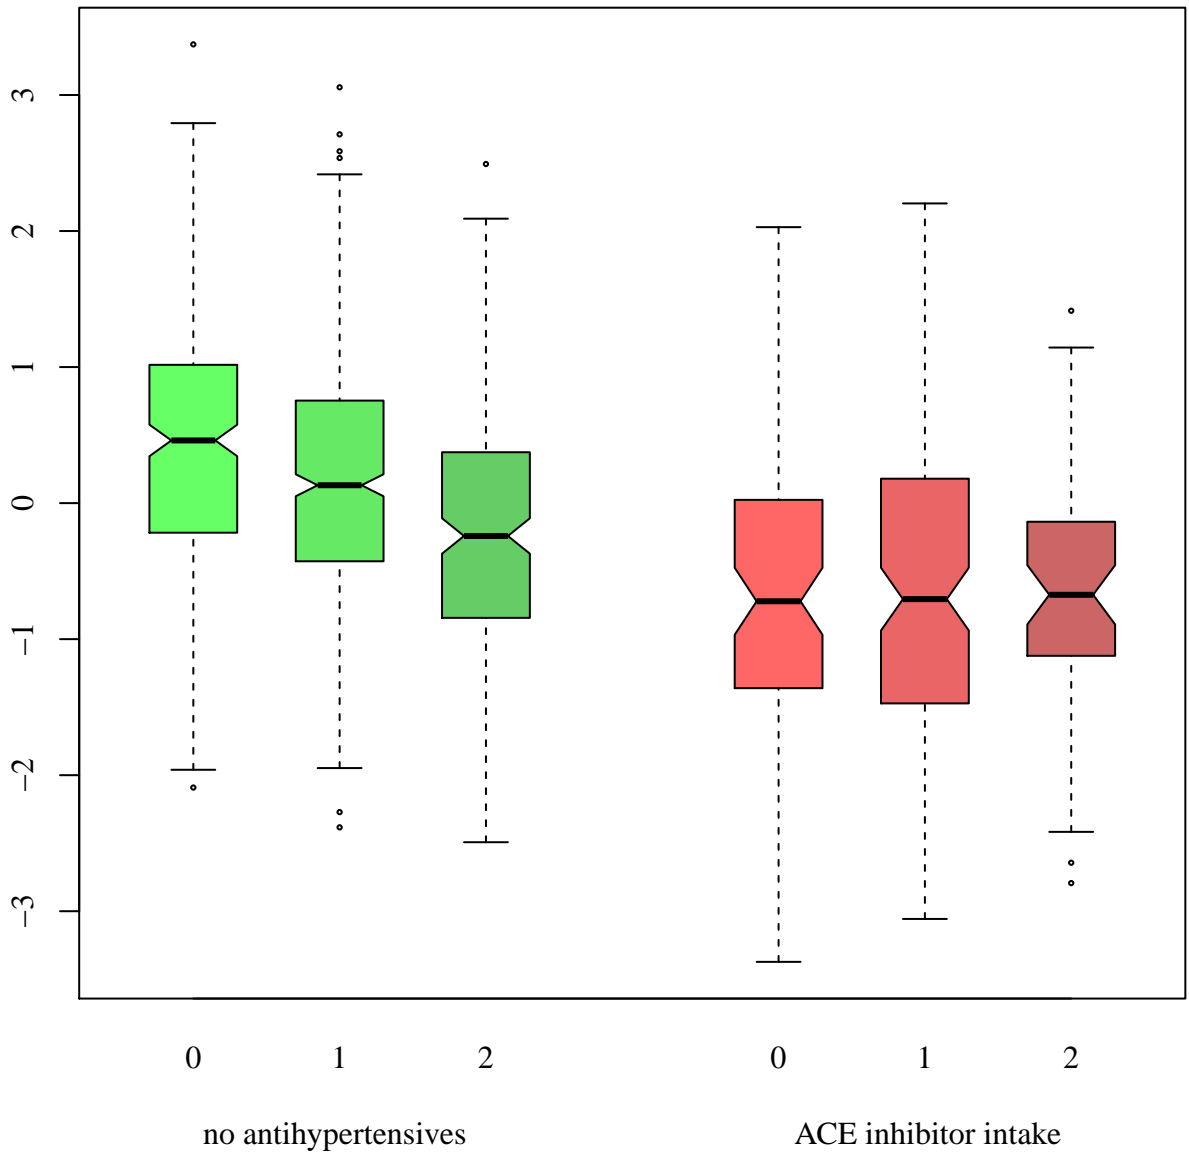

**X14189 – rs4359**

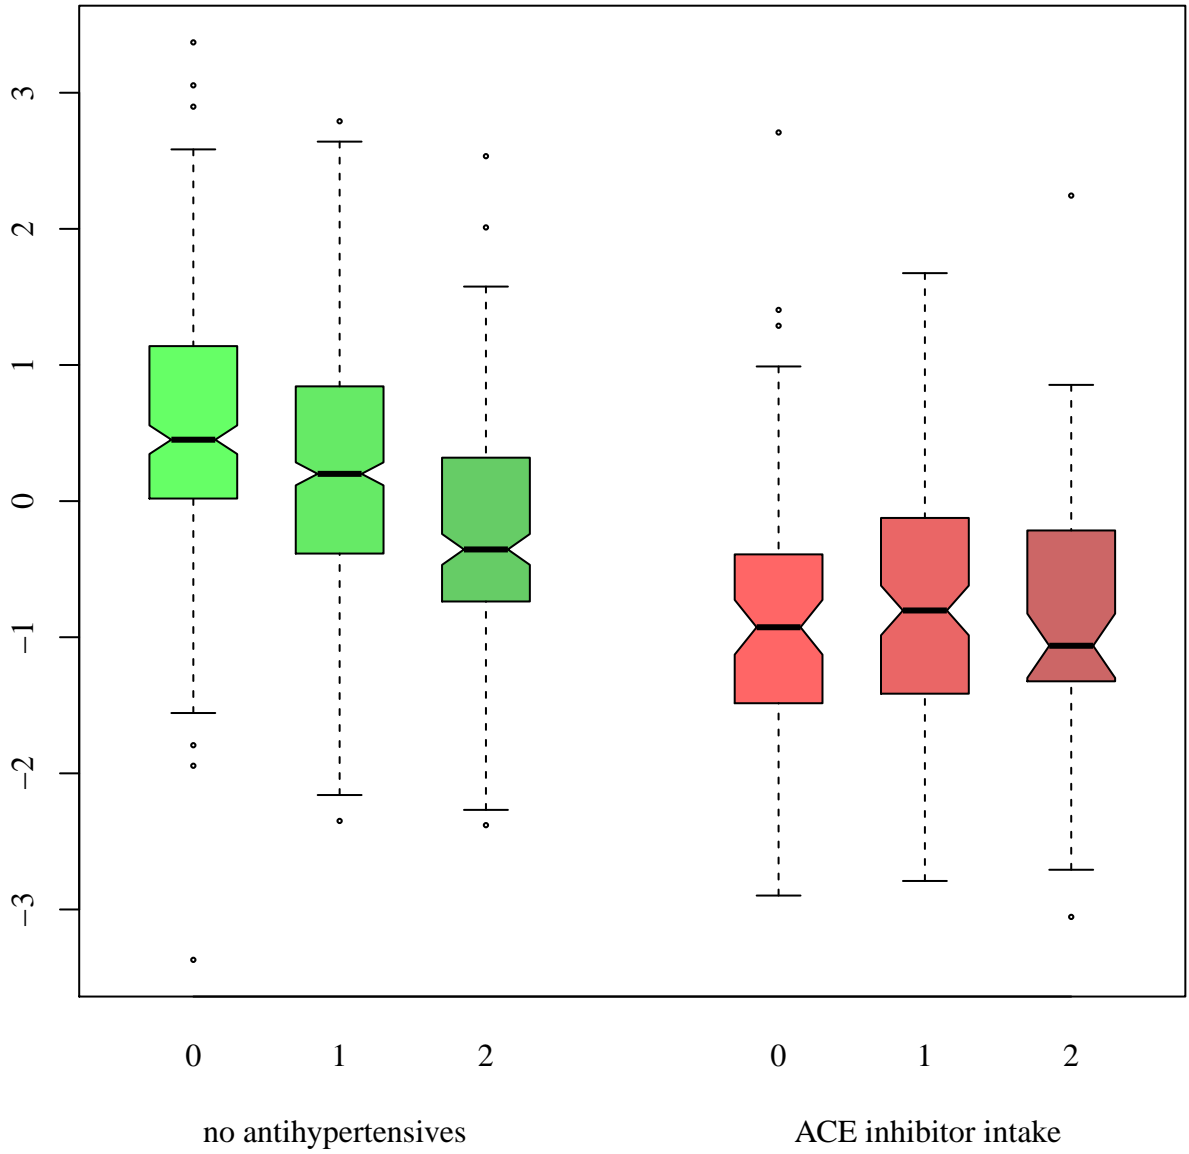

**X14205 – rs4359**

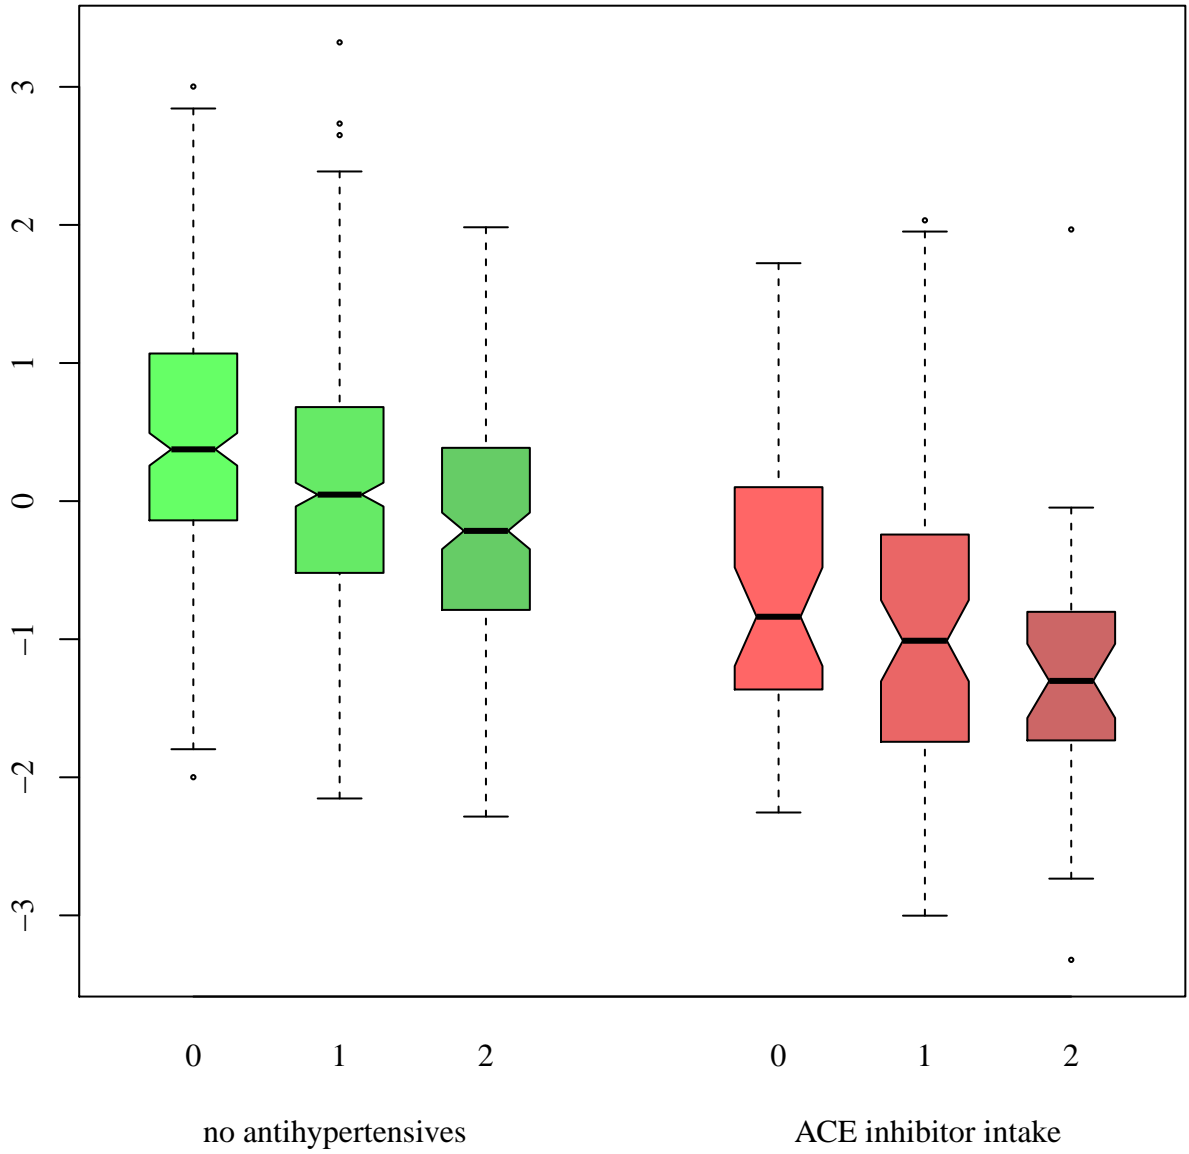

**X14208 – rs4359**

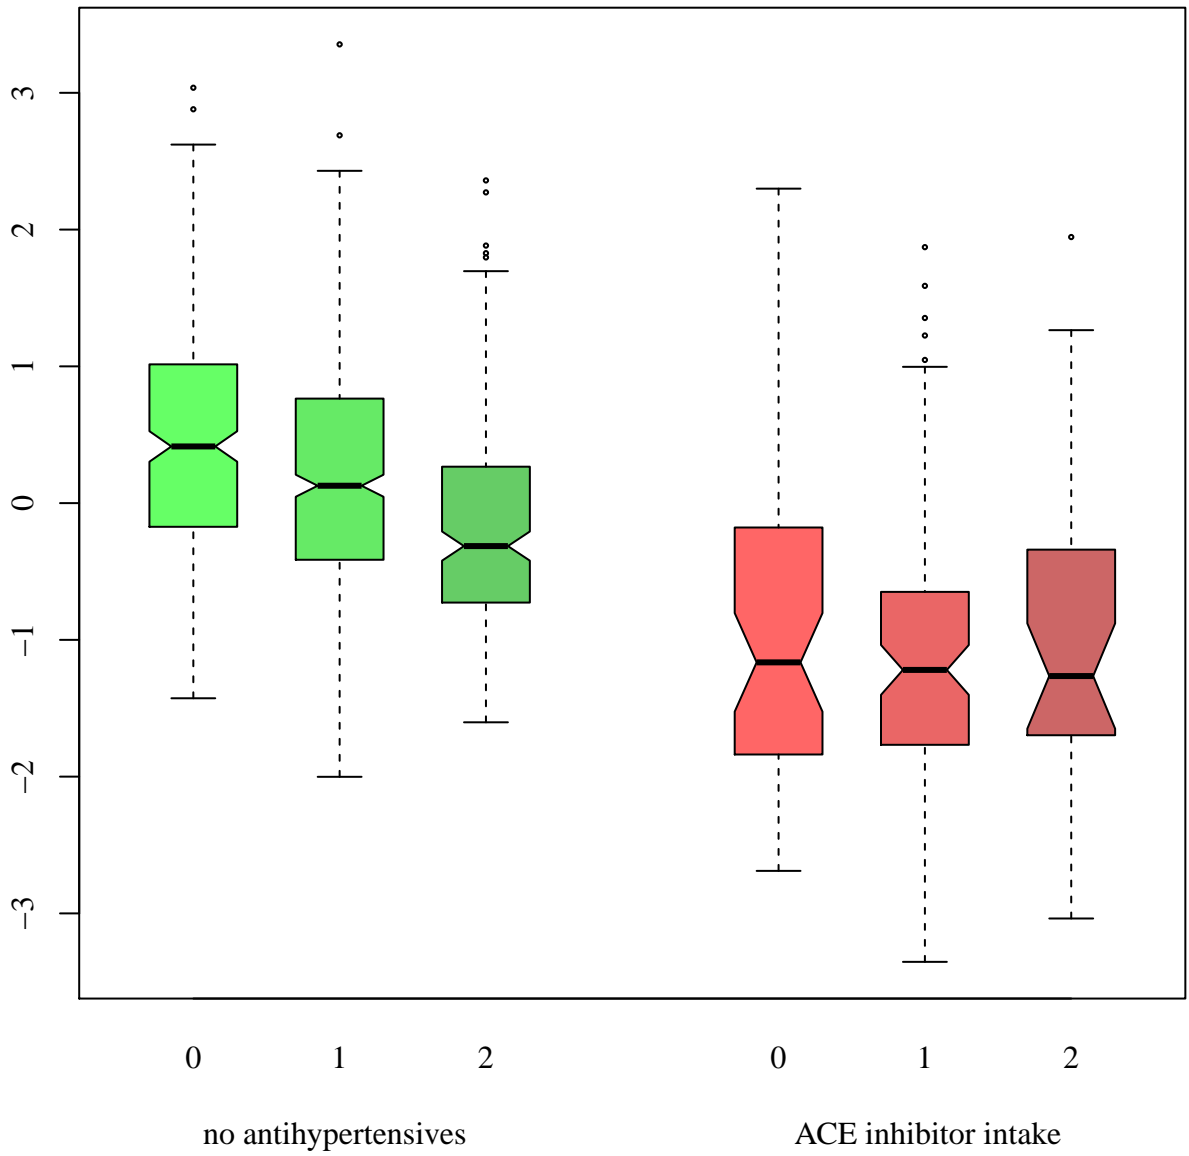

**X14304 – rs4359**

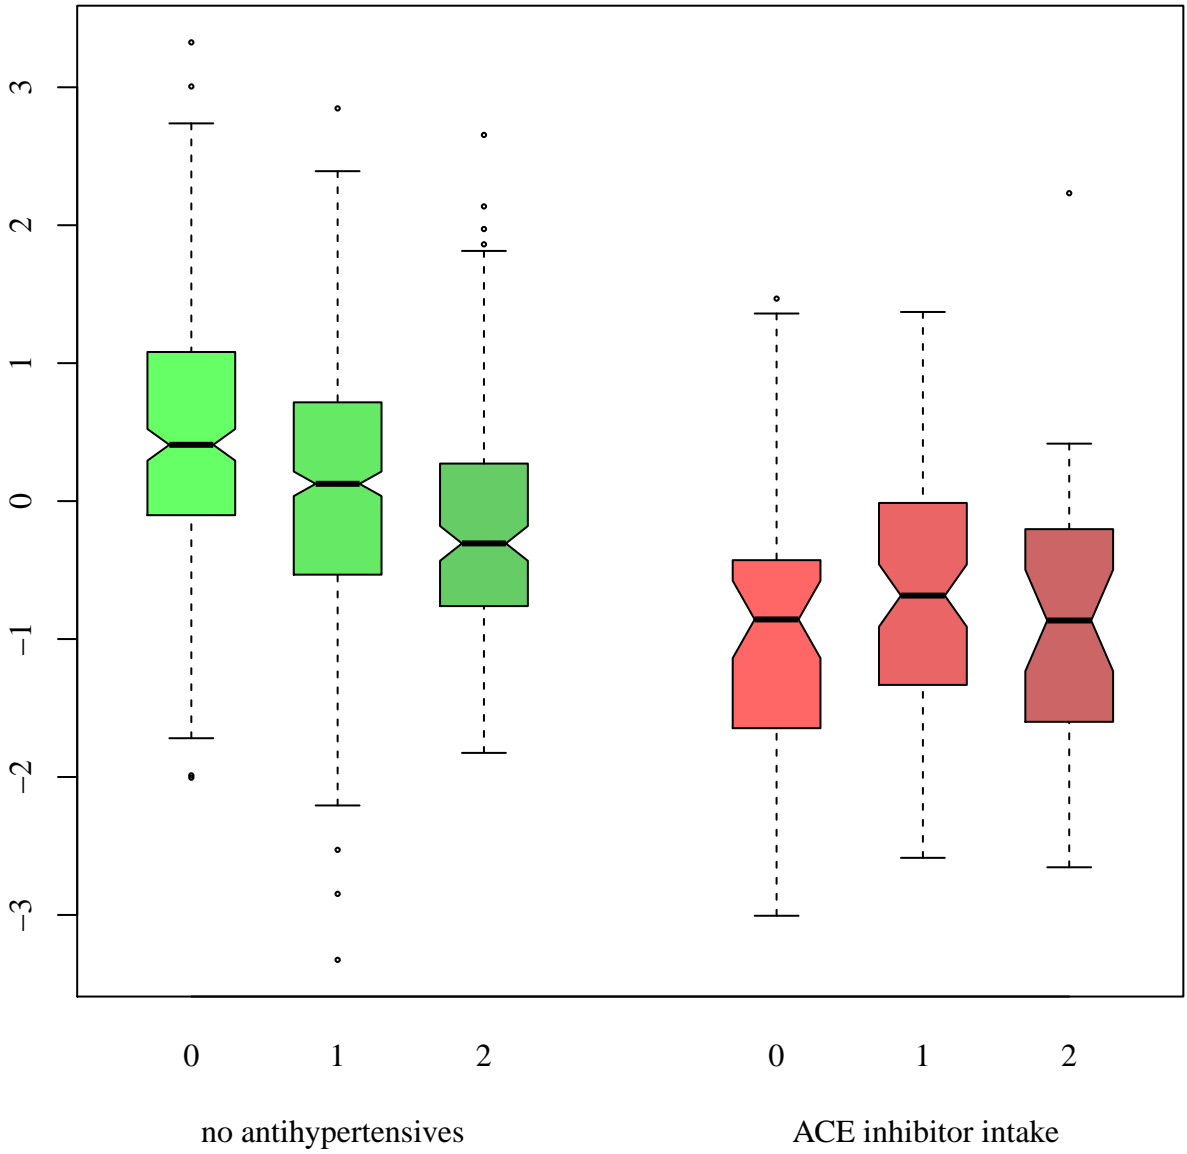

**aspartylphenylalanine – rs4362**

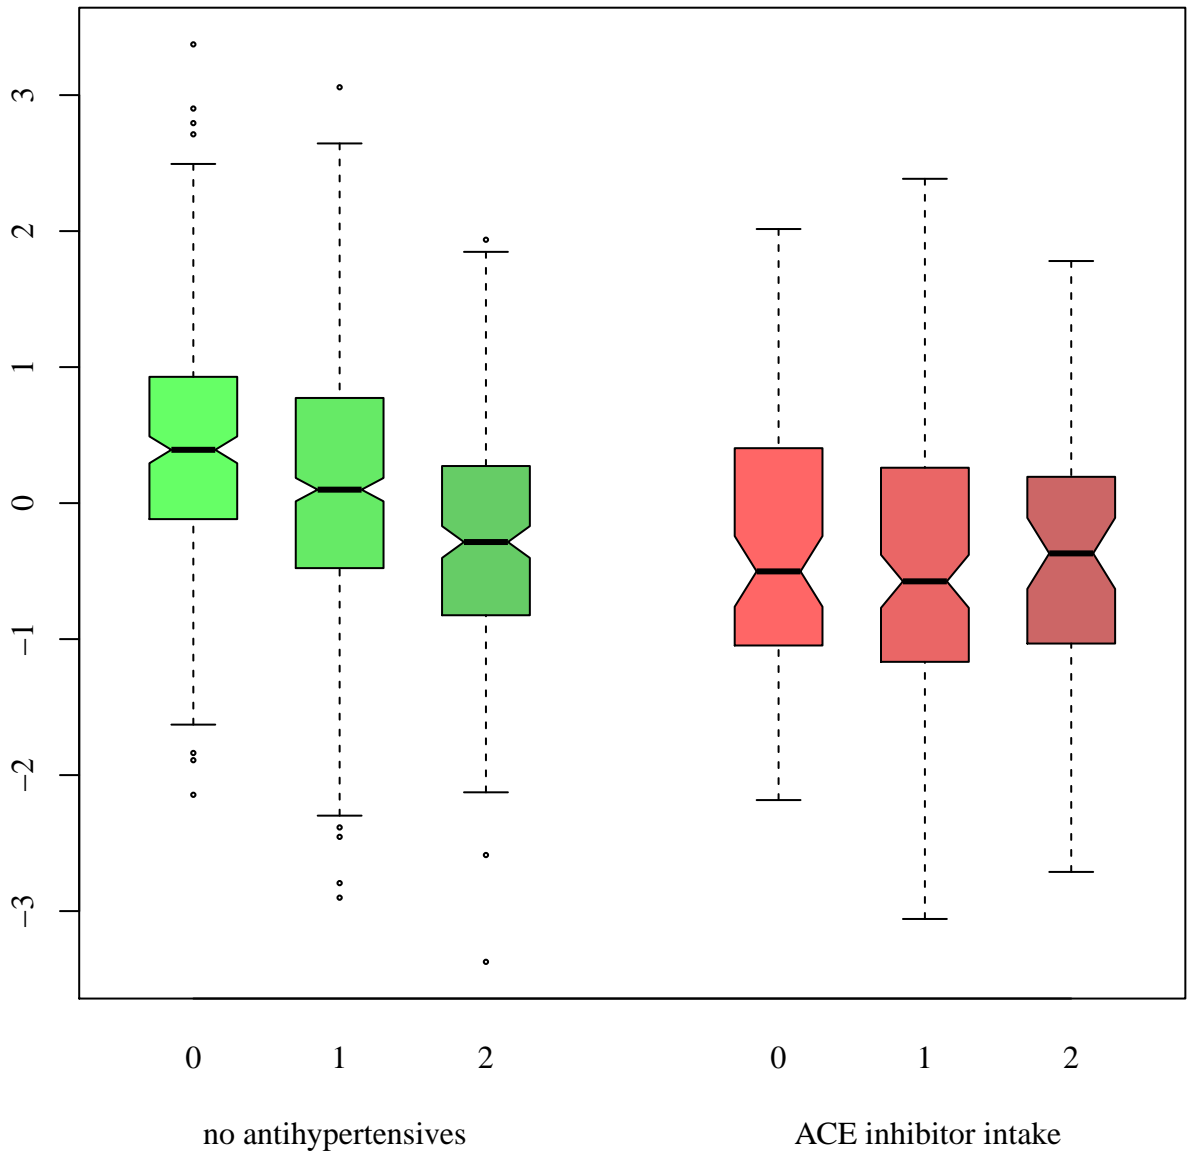



**aspartylphenylalanine/HWESASXX – rs4362**

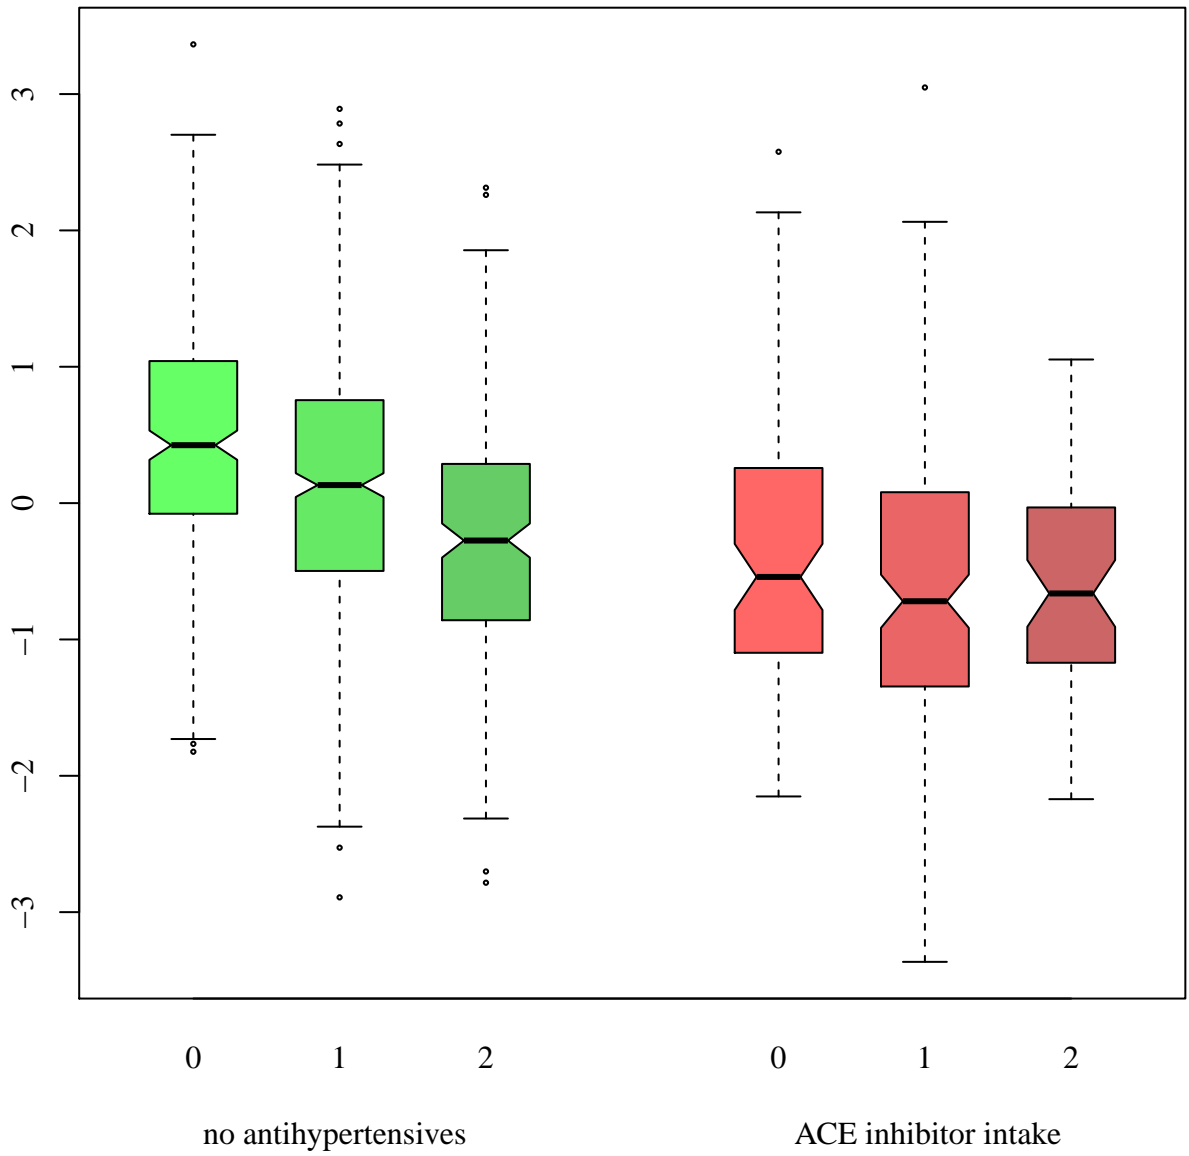

**aspartylphenylalanine/X11805 – rs4362**

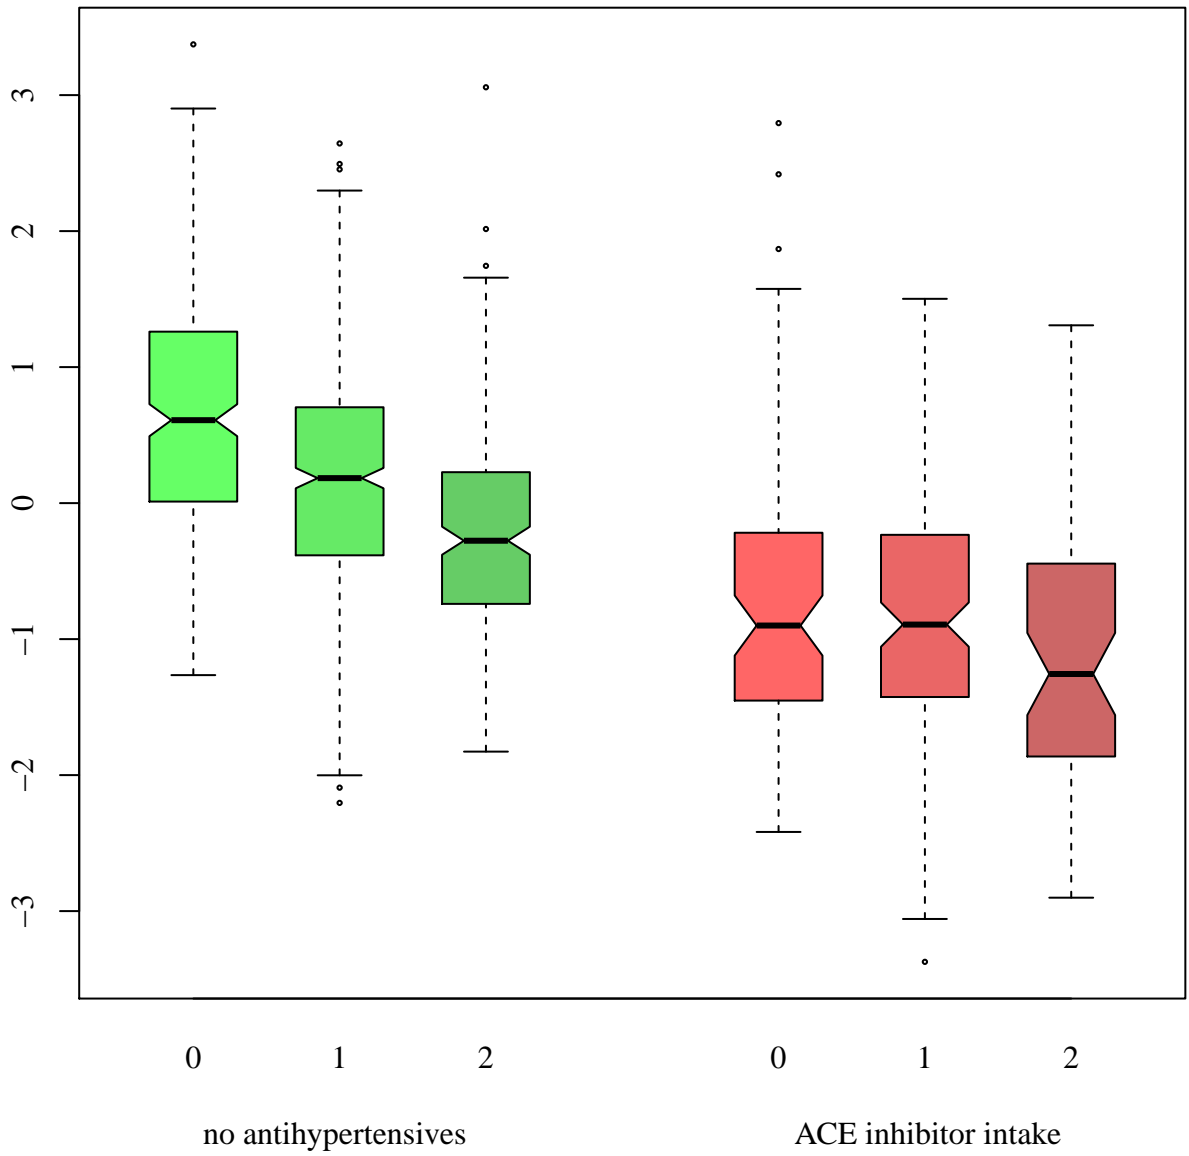

**aspartylphenylalanine/X14450 – rs4362**

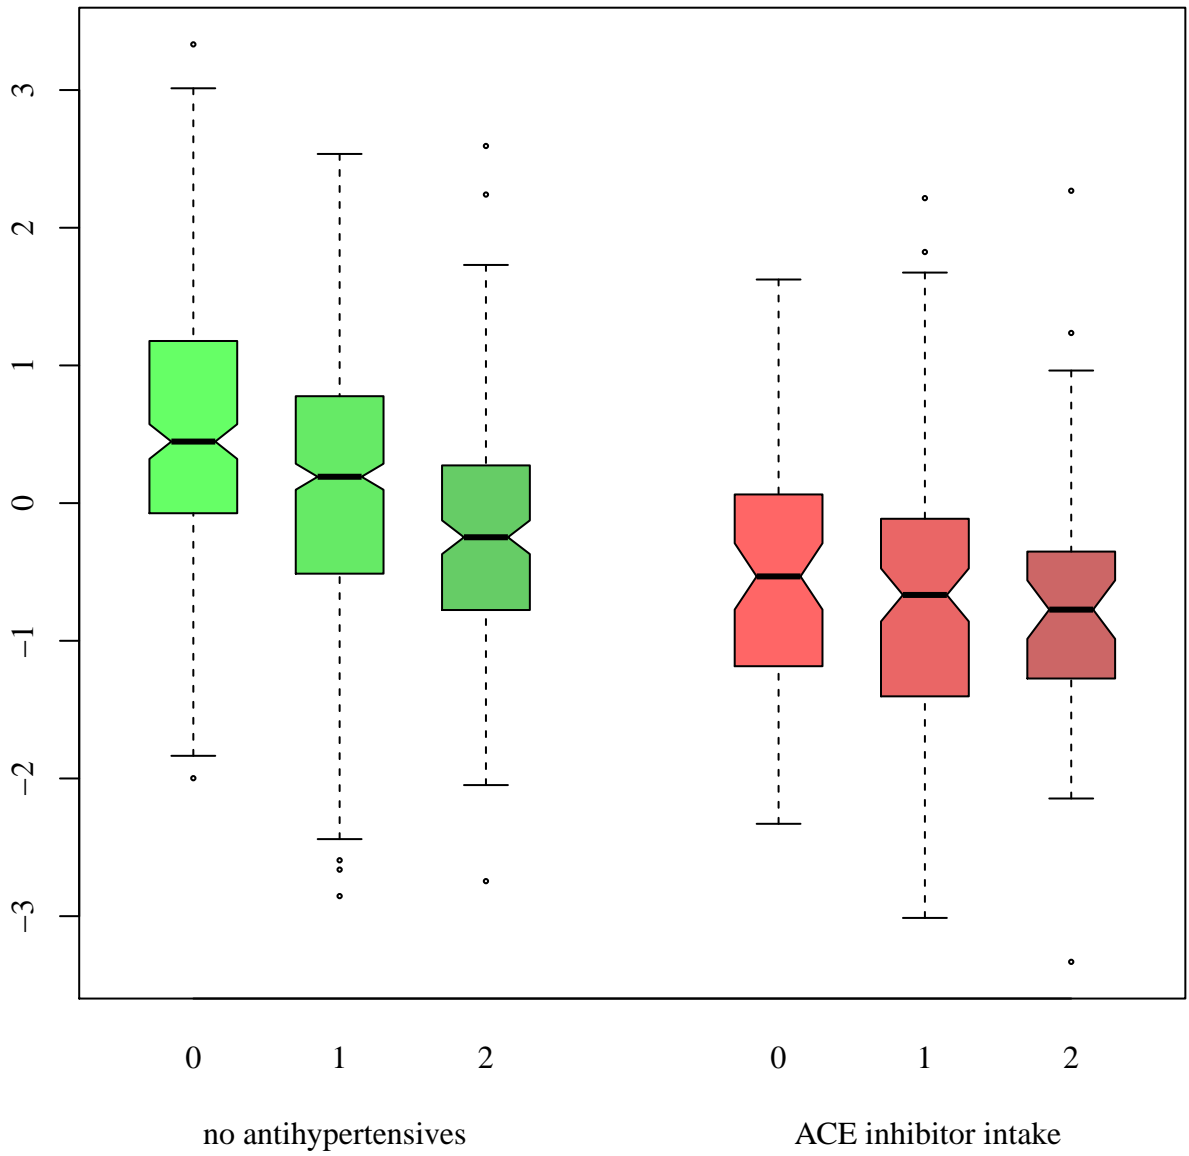

**X14086 – rs4362**

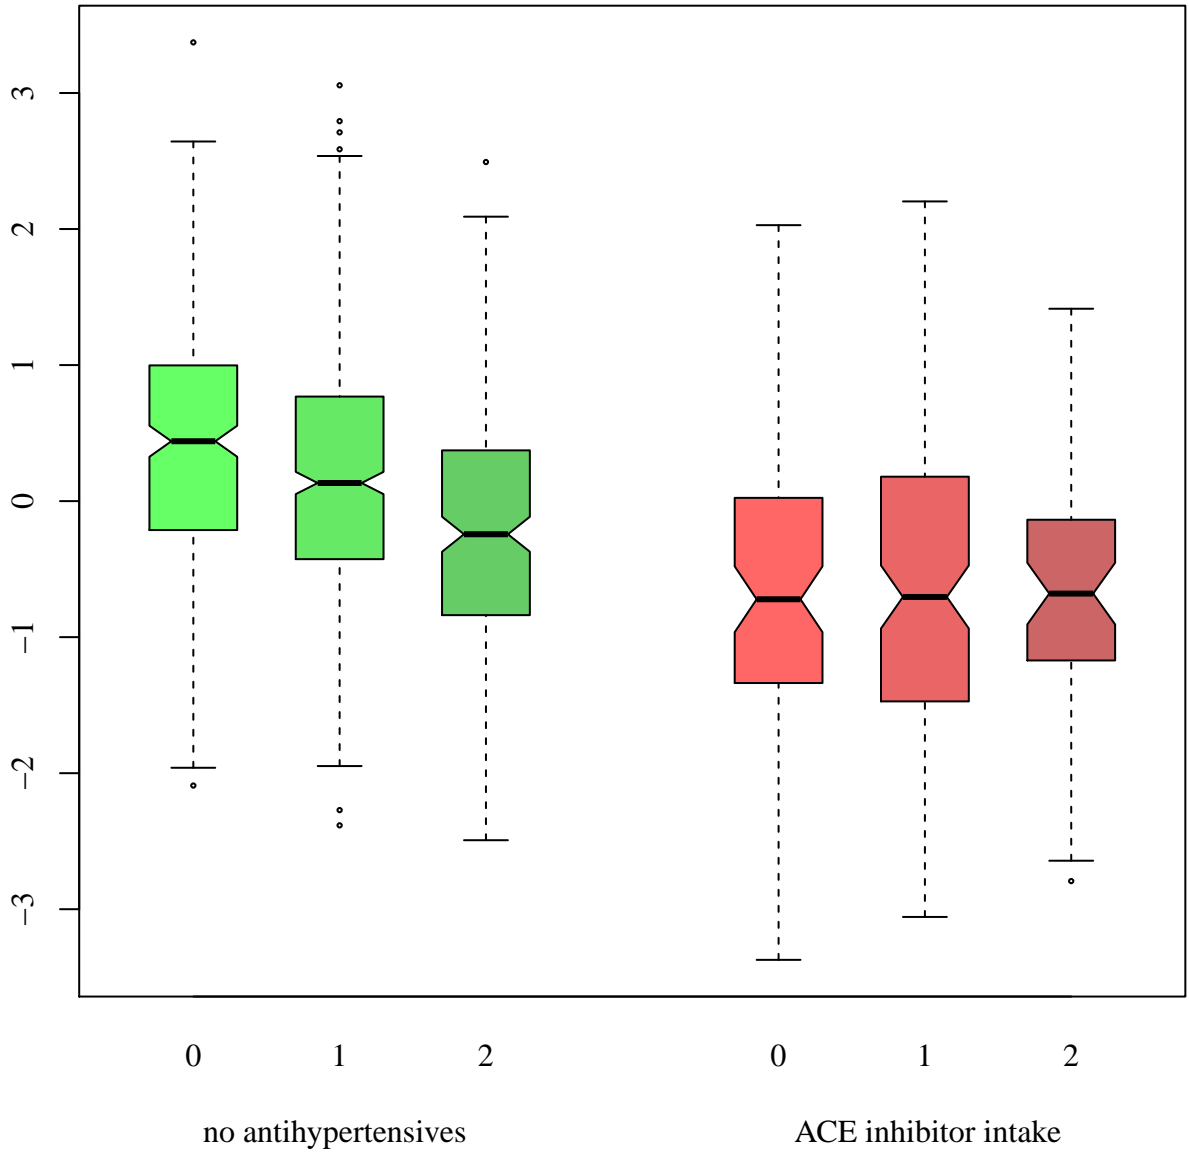

**X14189 – rs4362**

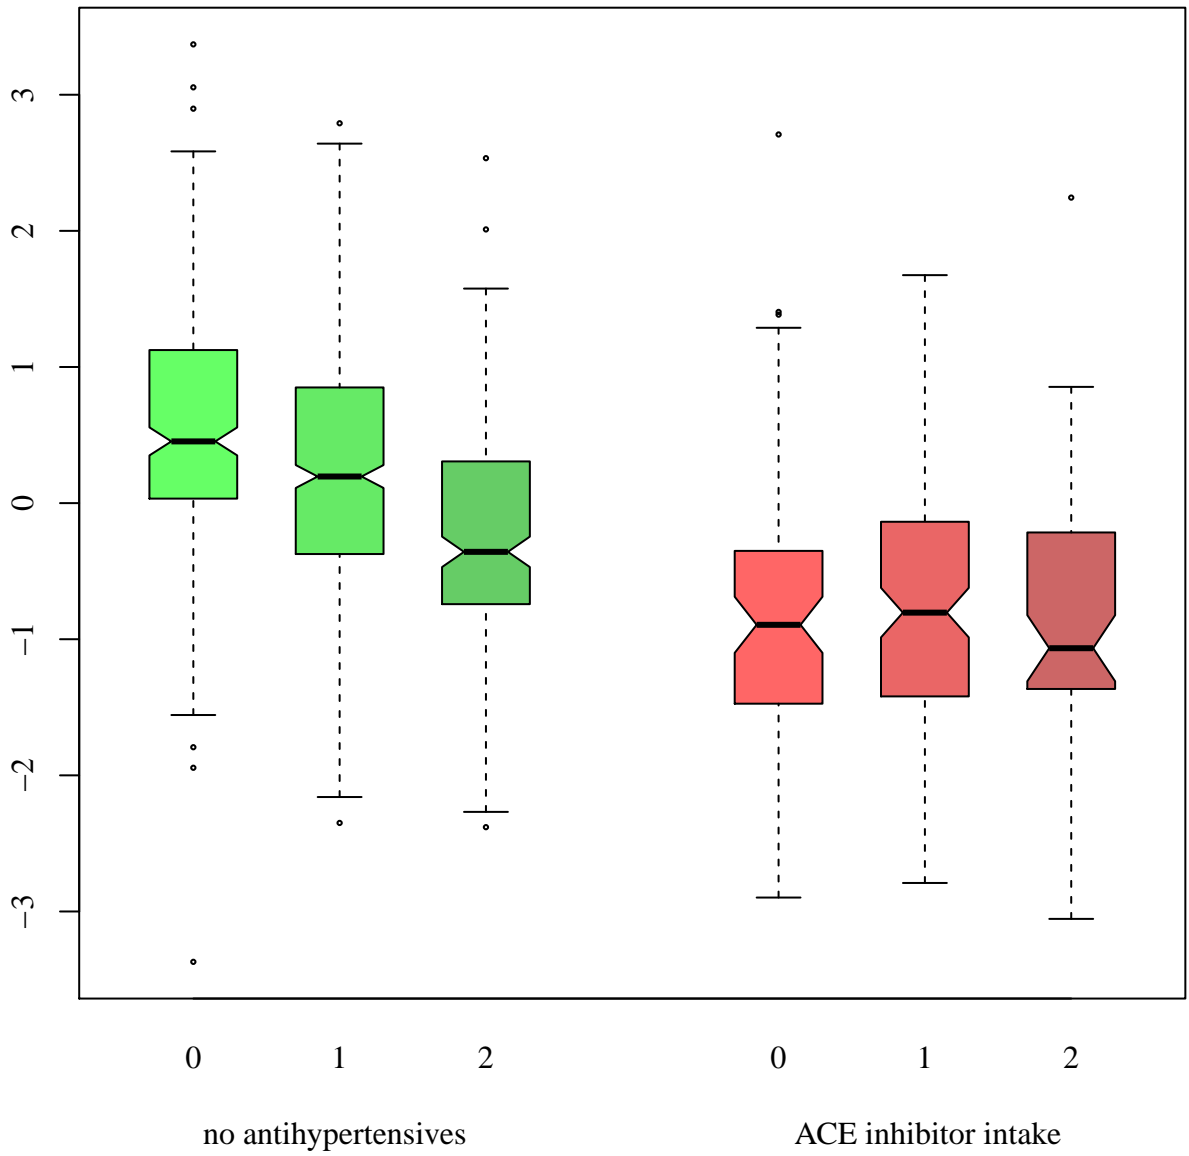

**X14205 – rs4362**

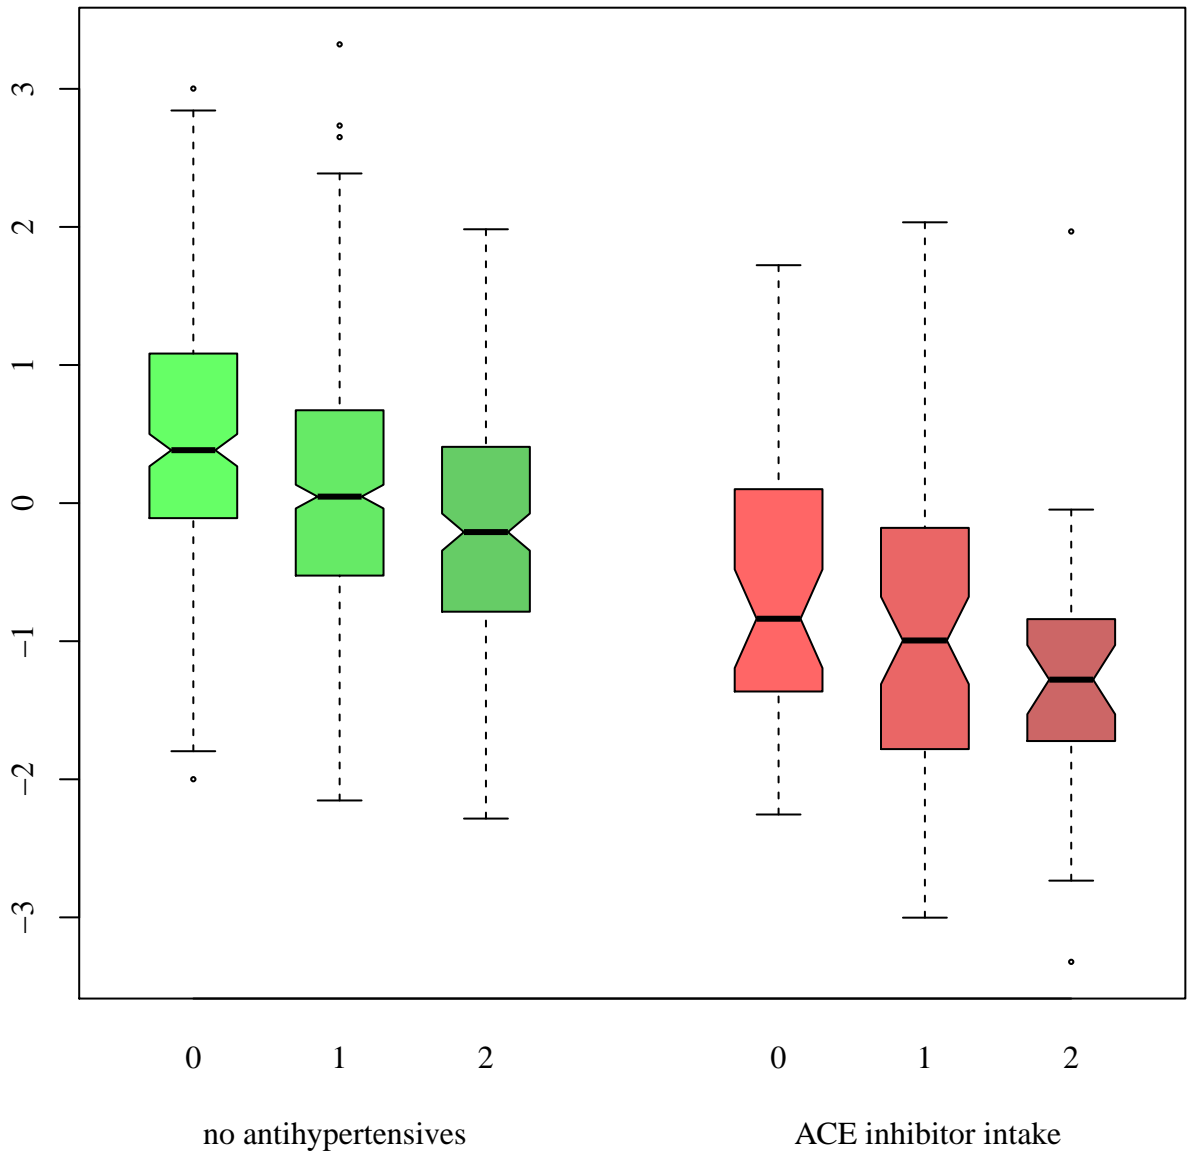

**X14208 – rs4362**

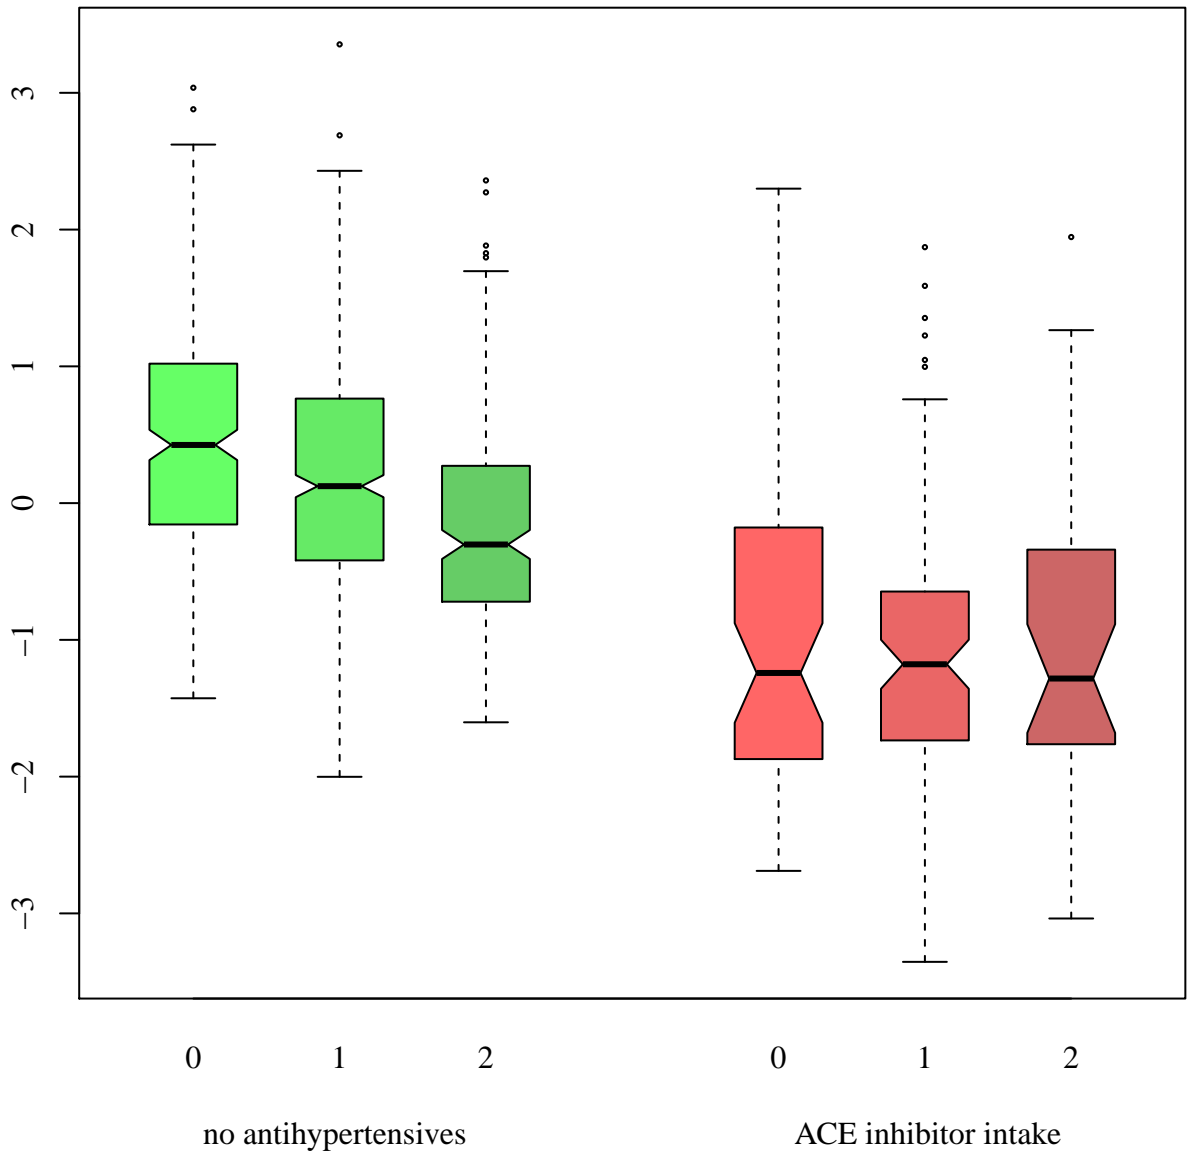

**X14304 – rs4362**

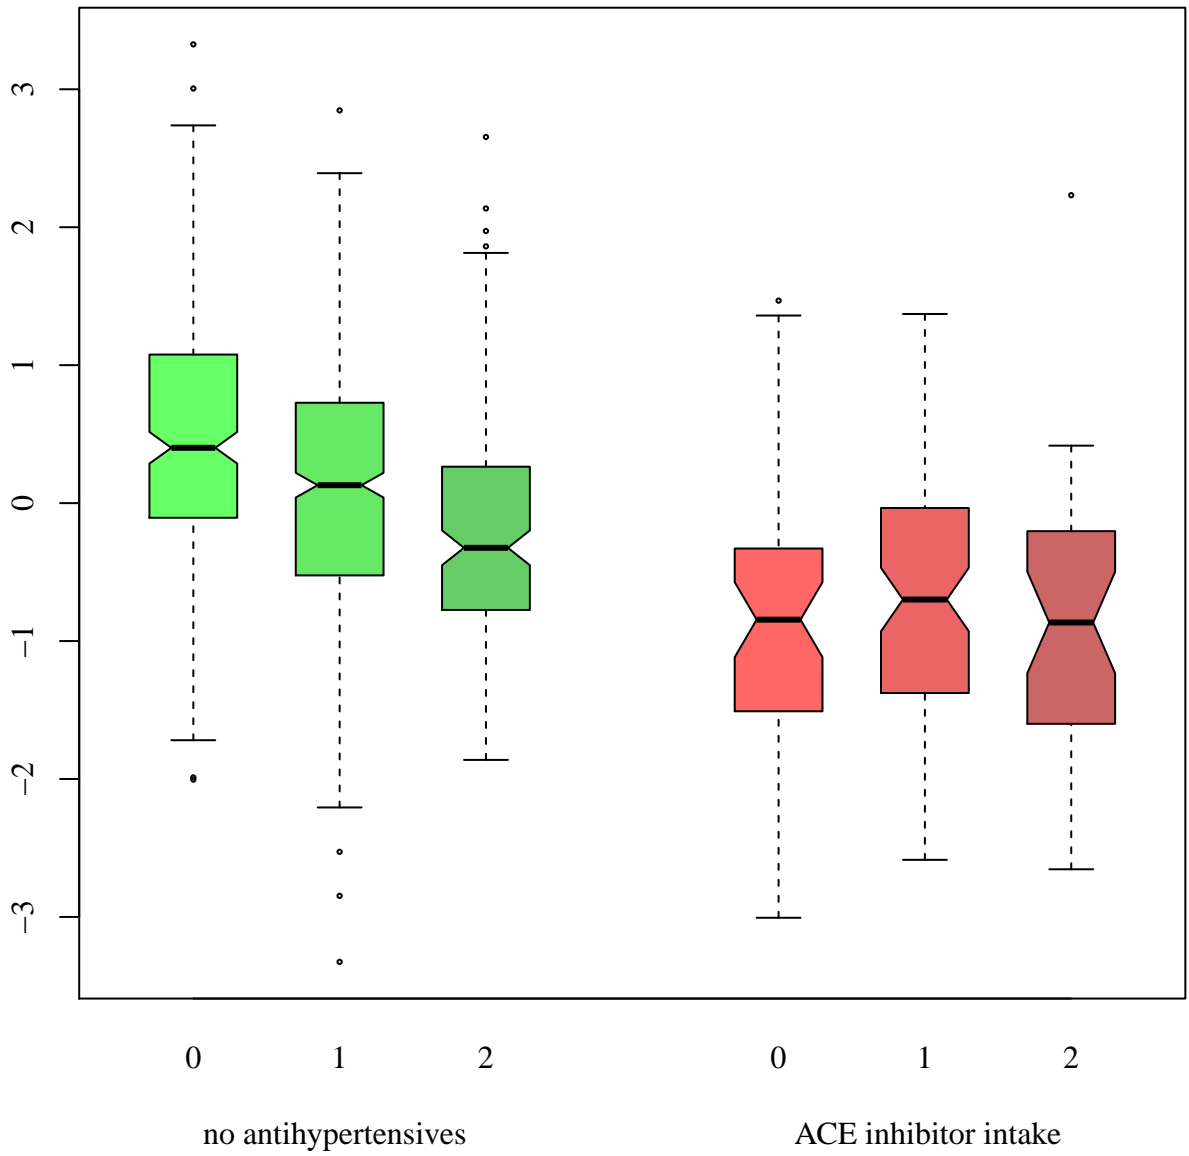



aspartylphenylalanine – rs4363

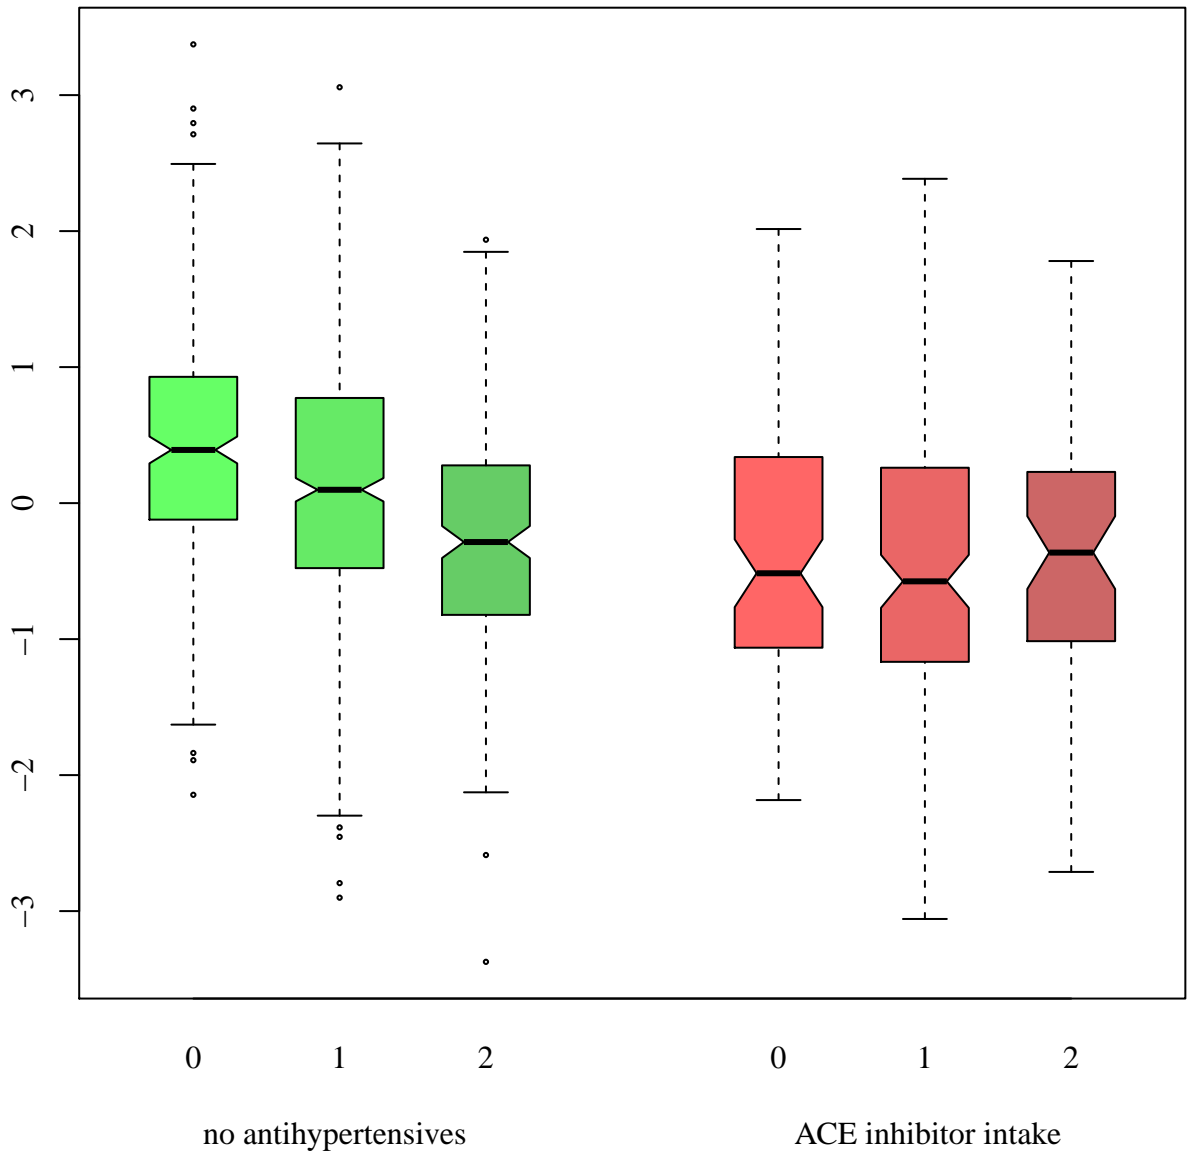

**aspartylphenylalanine/HWESASXX – rs4363**

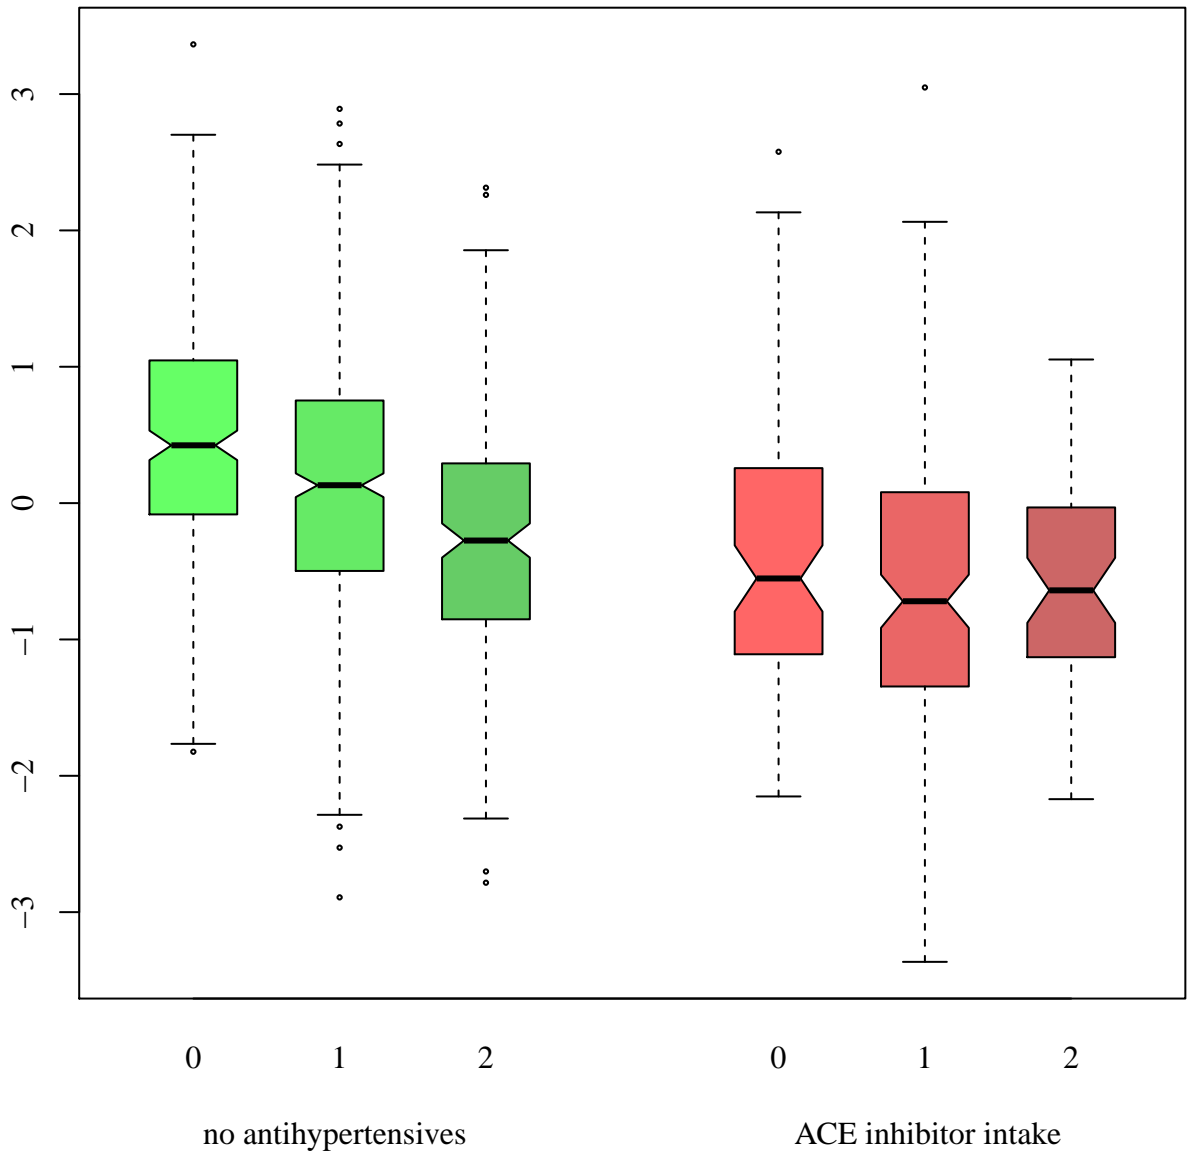

aspartylphenylalanine/X11805 – rs4363

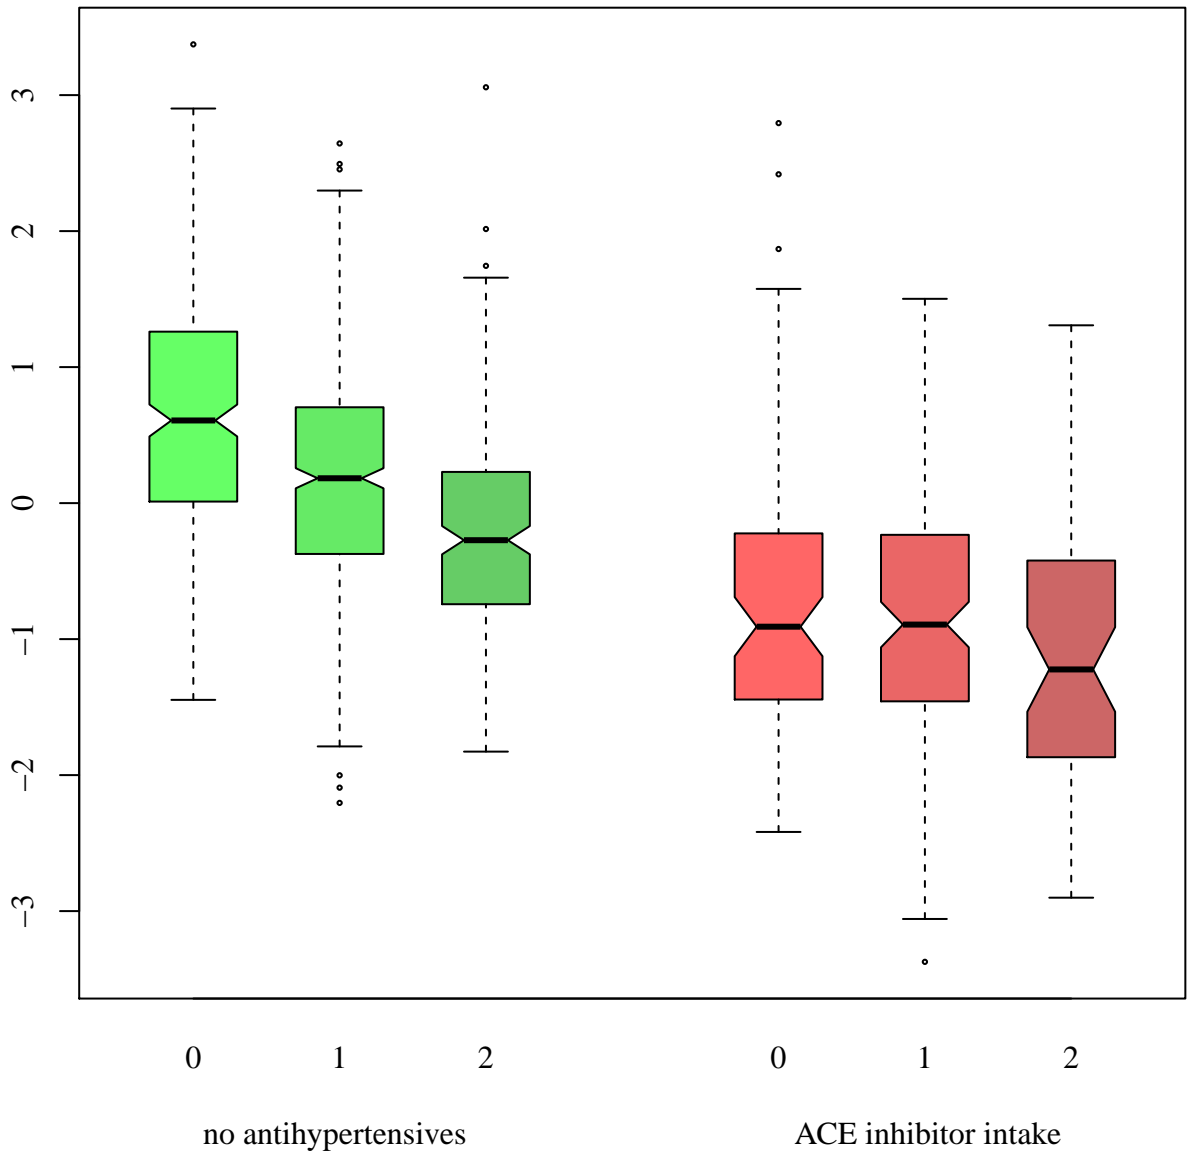

**aspartylphenylalanine/X14450 – rs4363**

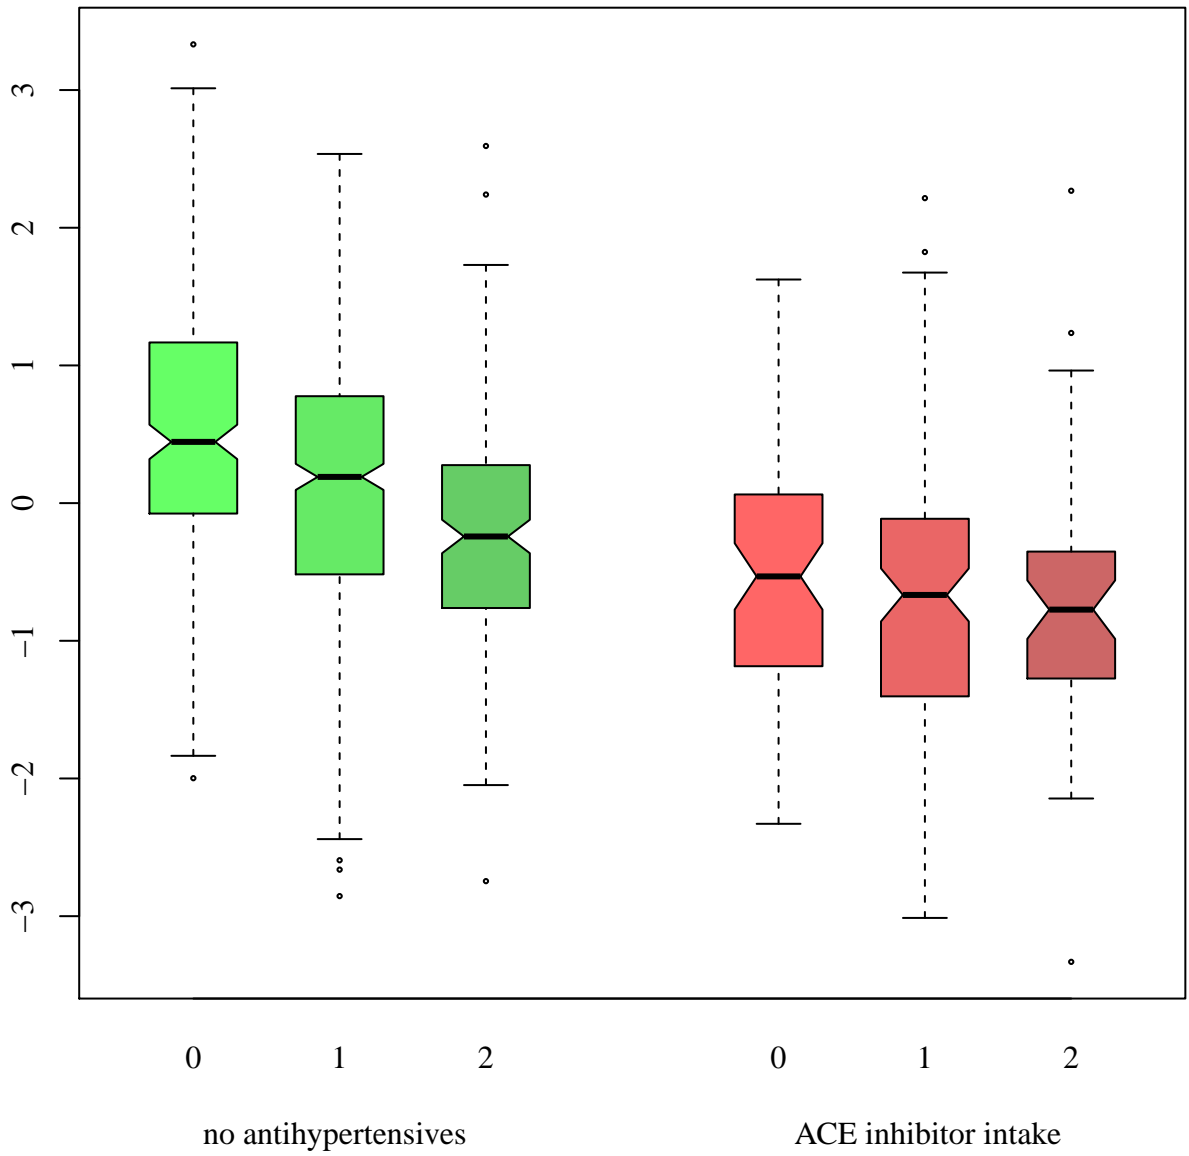

**X14086 – rs4363**

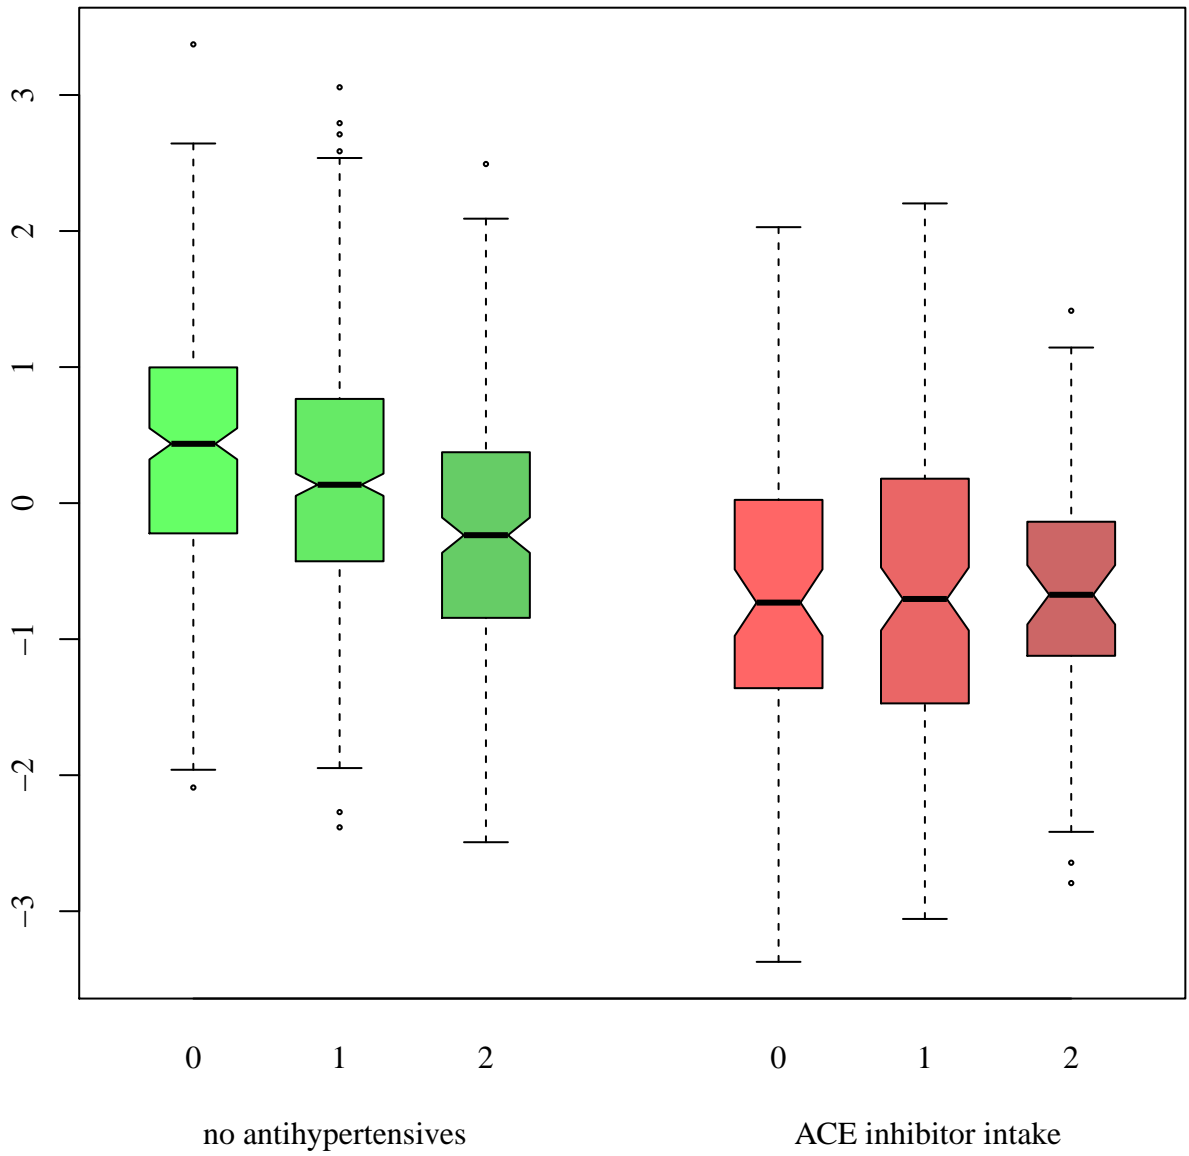

**X14189 – rs4363**

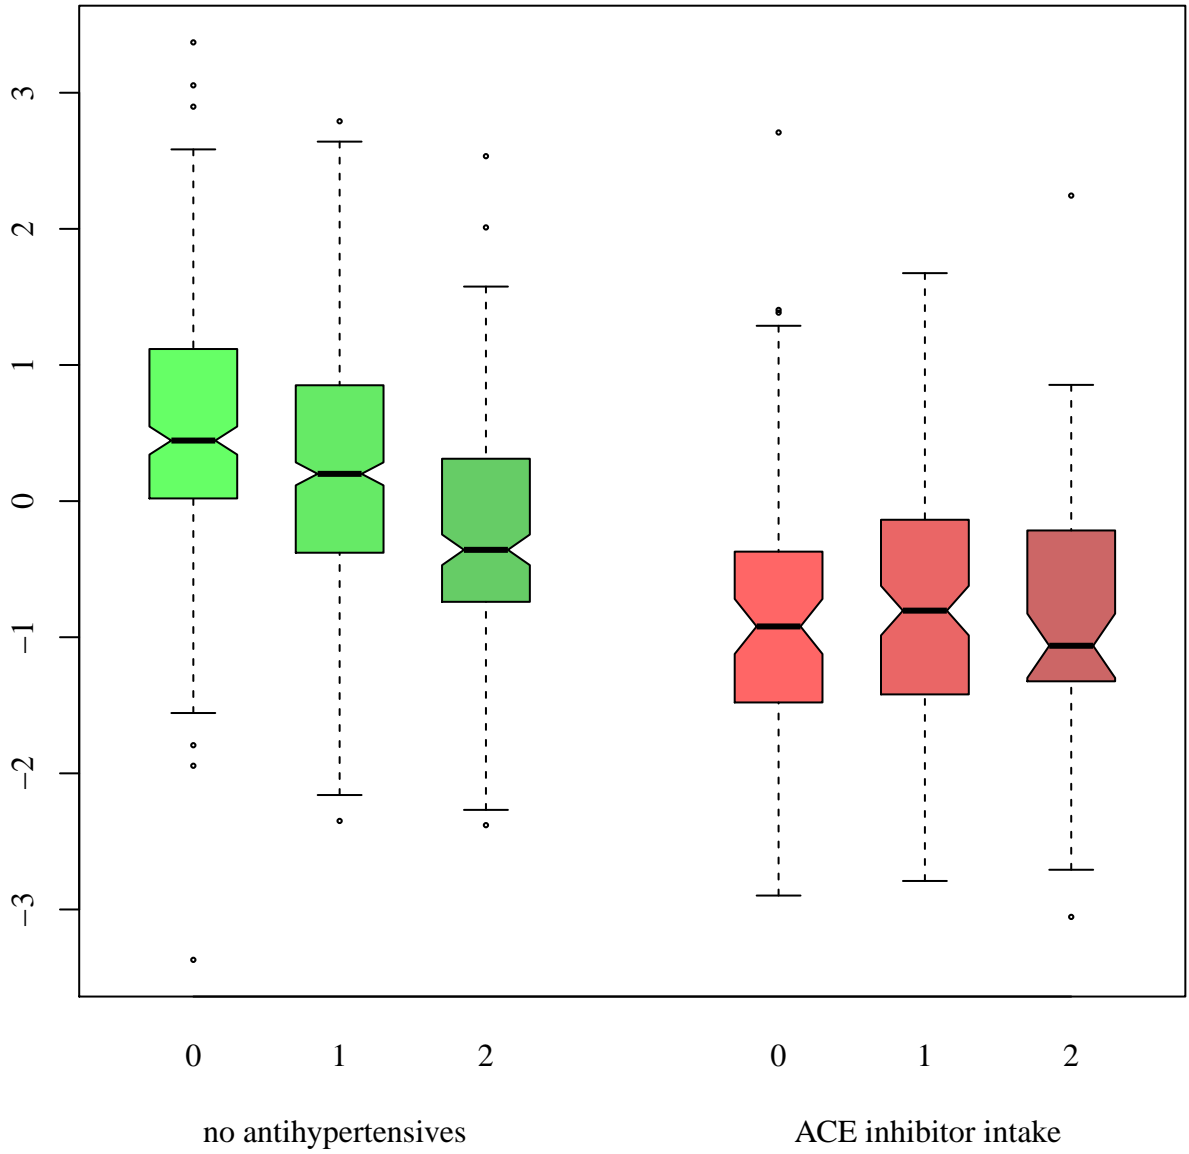

**X14205 – rs4363**

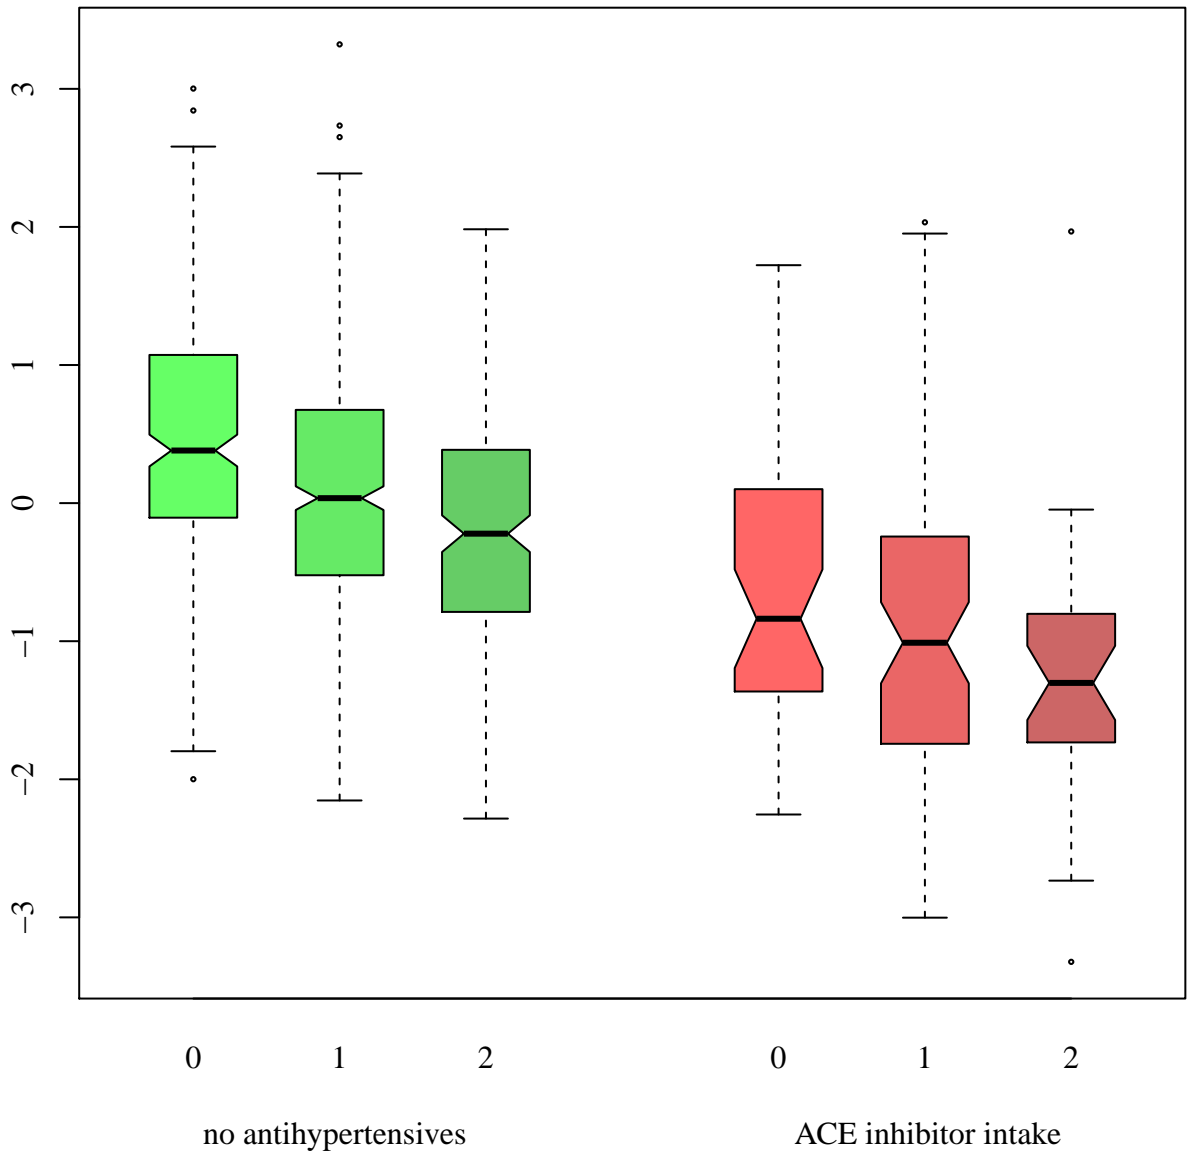

**X14208 – rs4363**

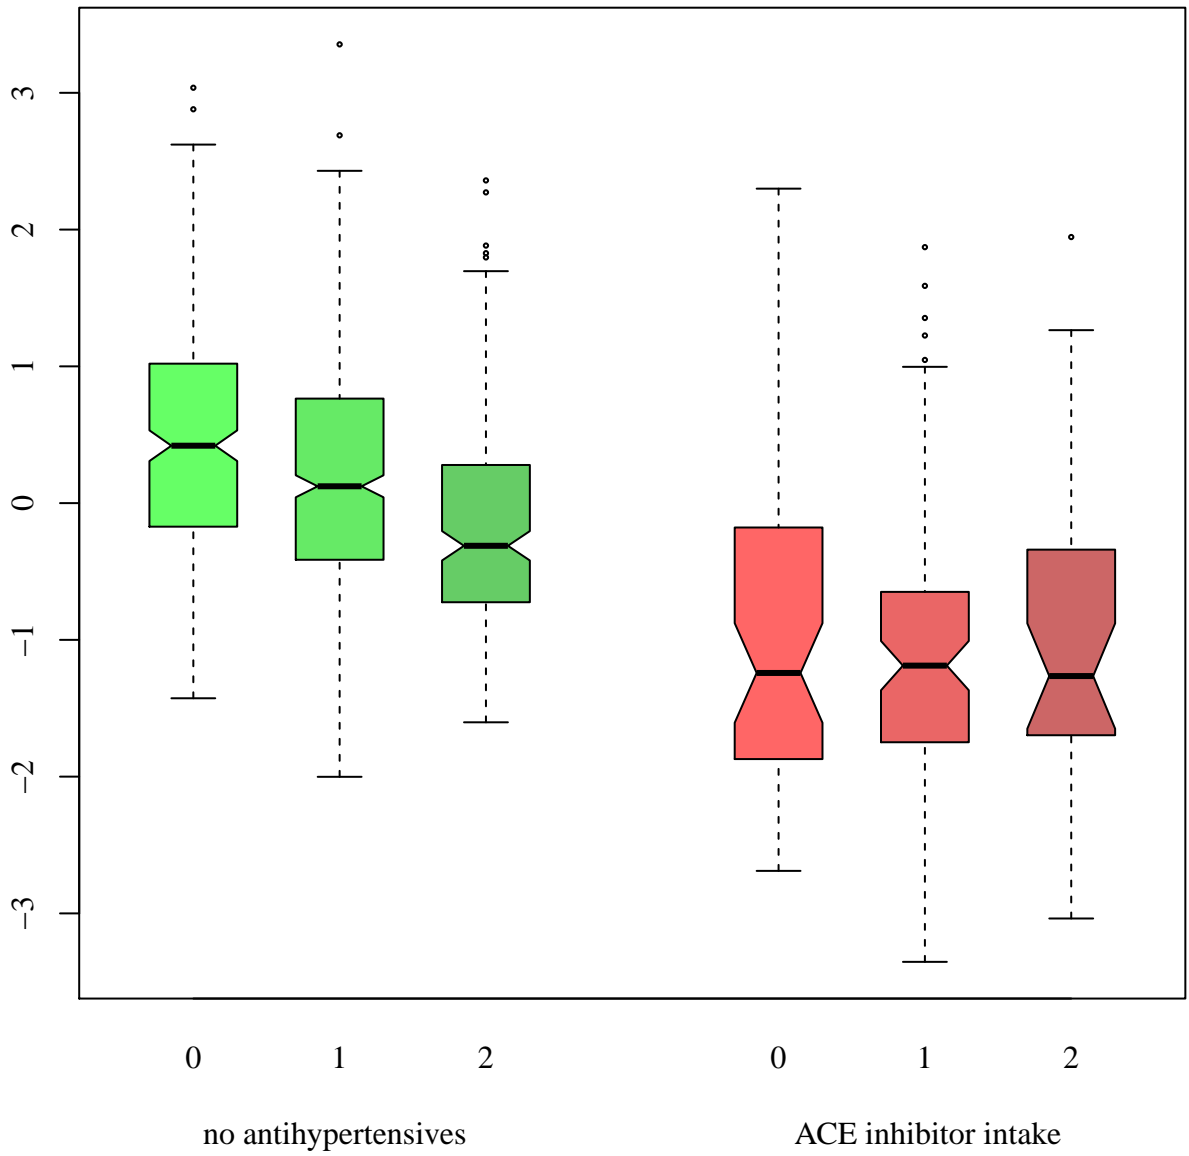



**X14304 – rs4363**

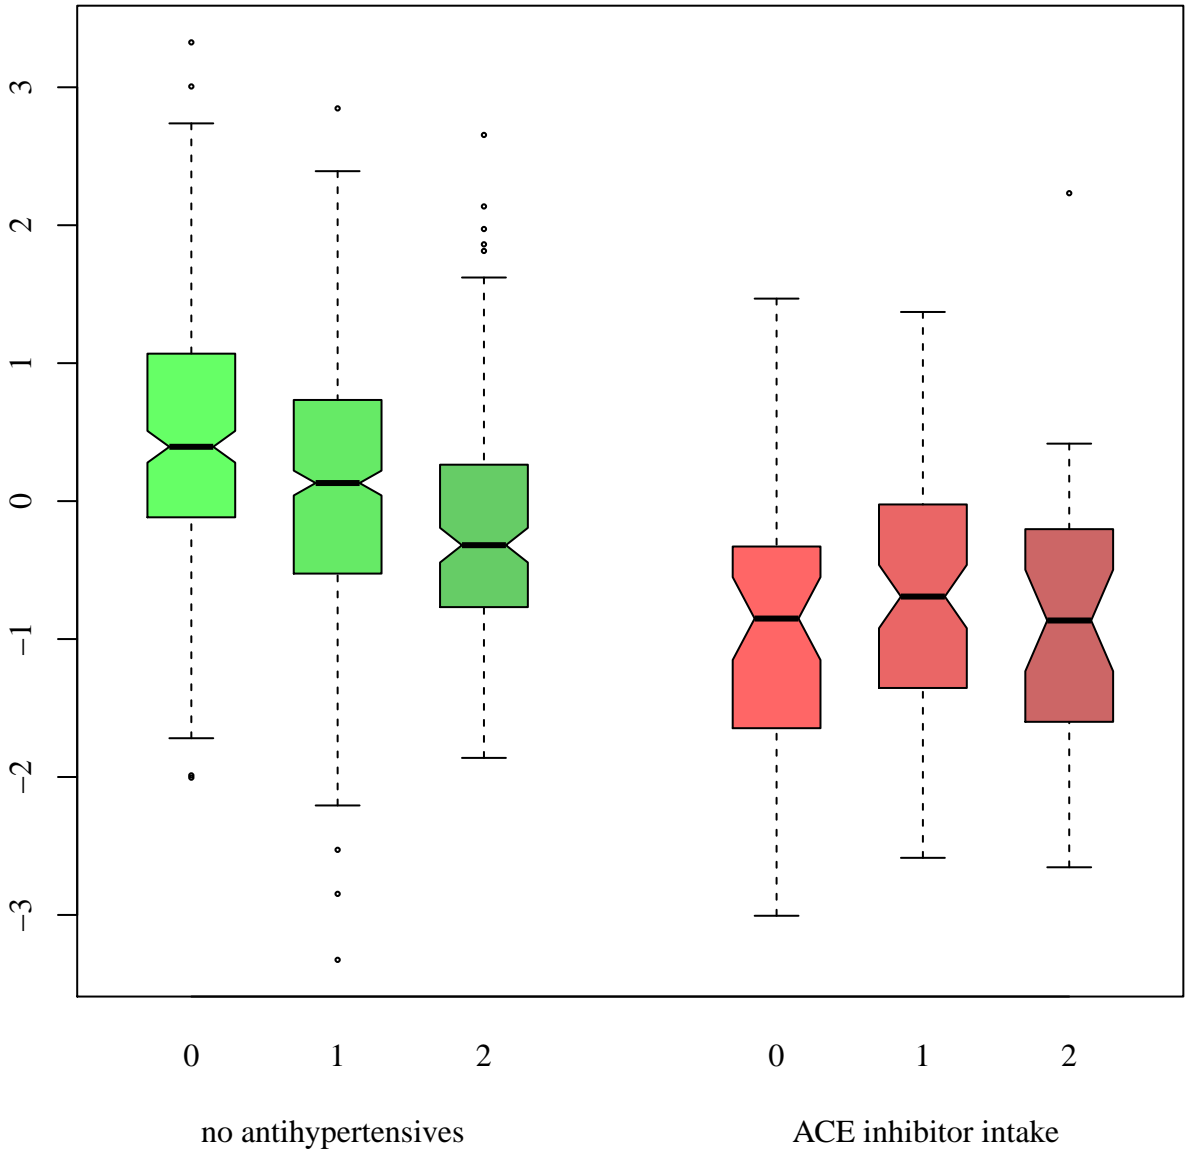

**aspartylphenylalanine – rs1055086**

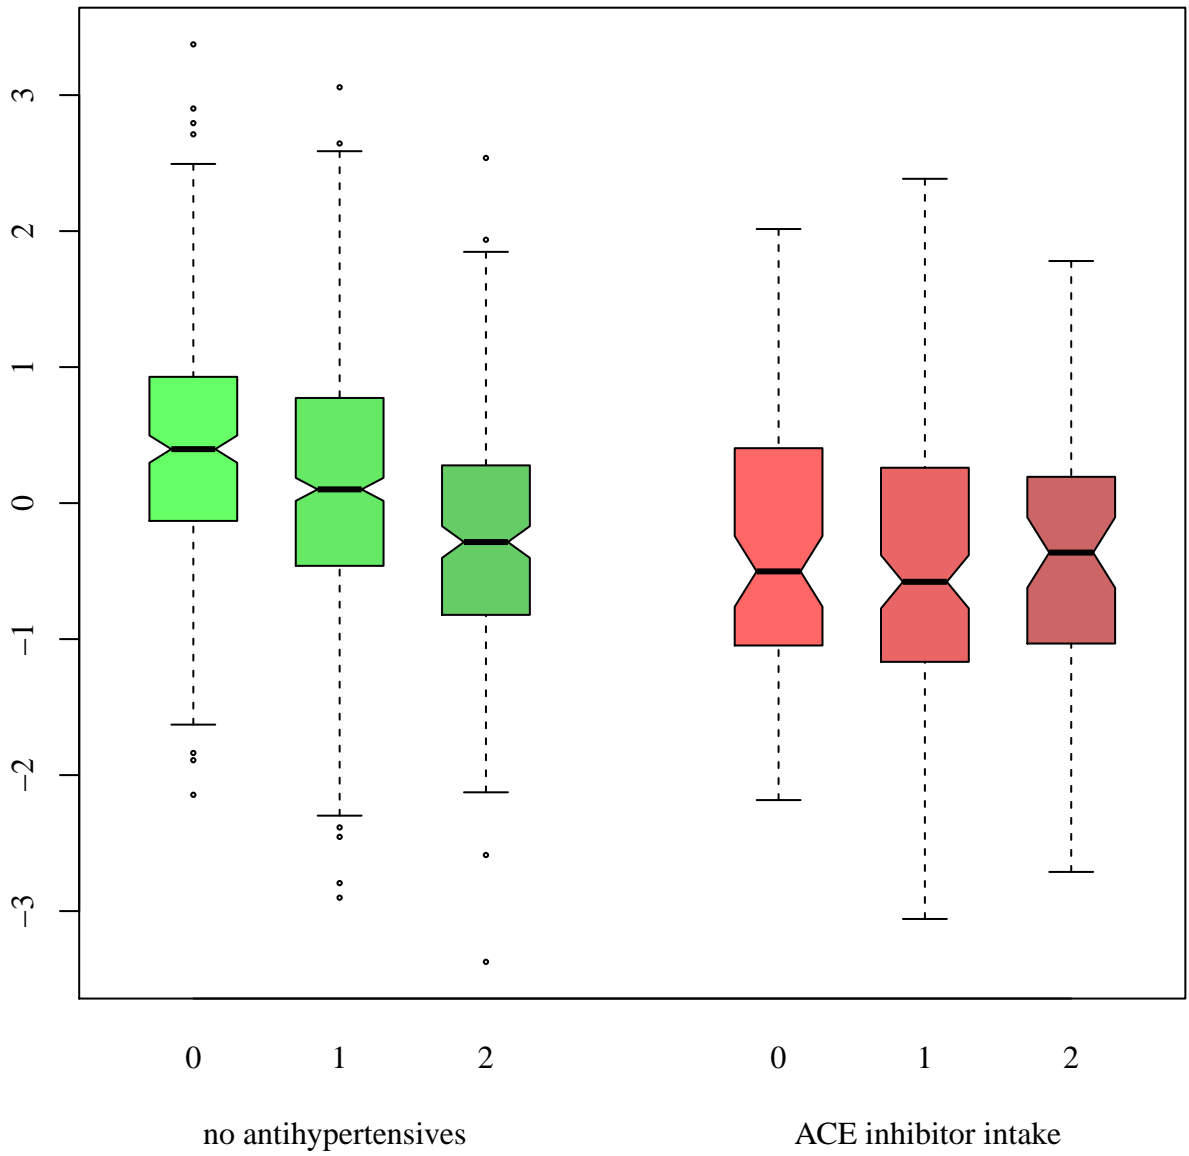

**aspartylphenylalanine/HWESASXX – rs1055086**

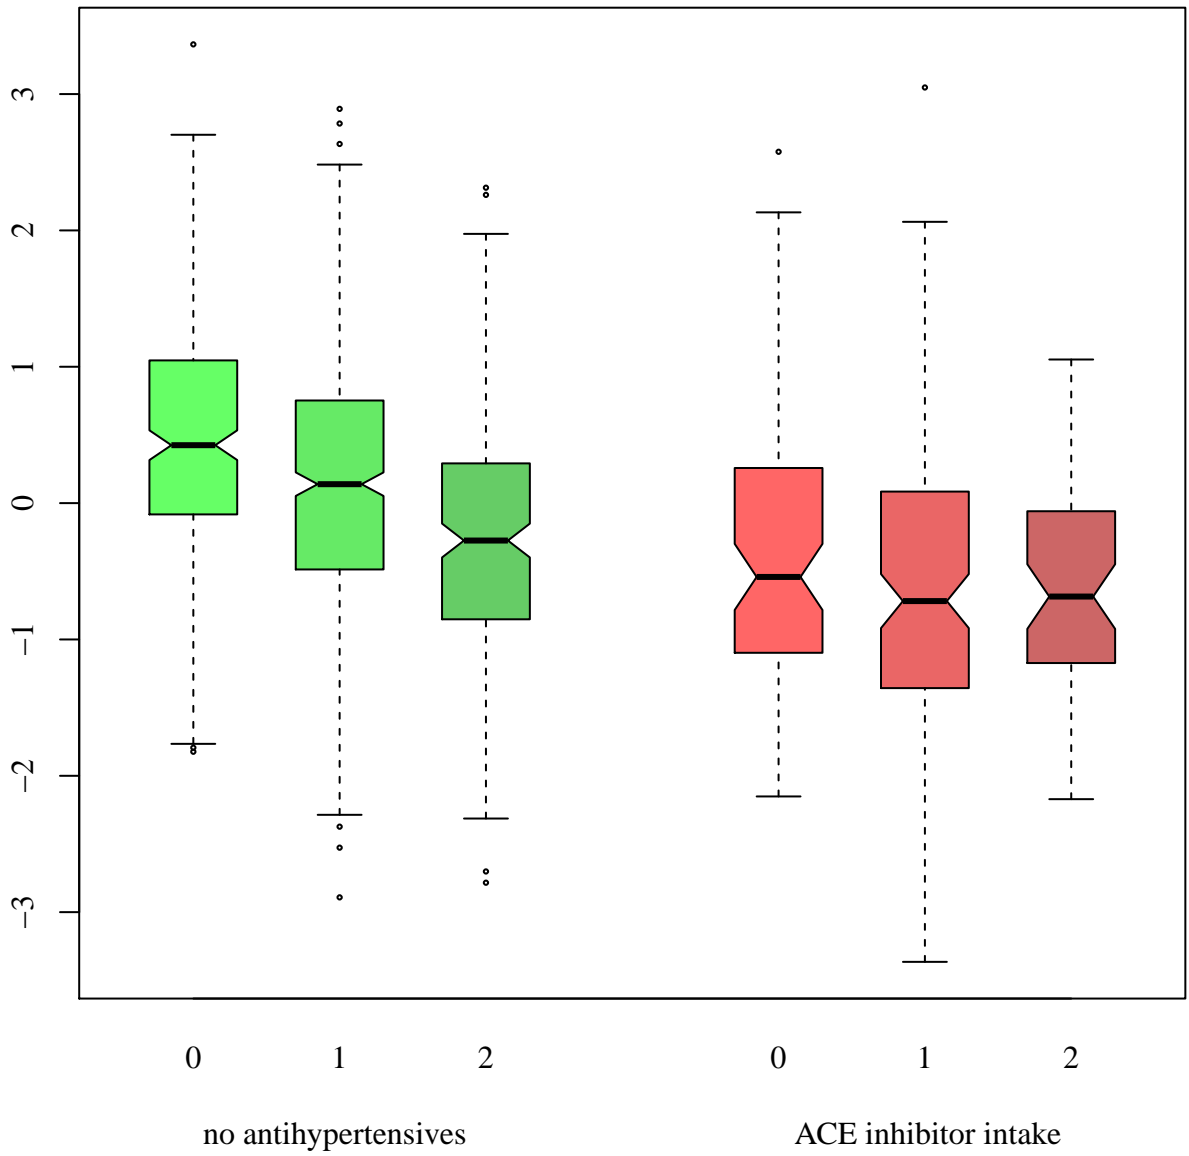

**aspartylphenylalanine/X11805 – rs1055086**

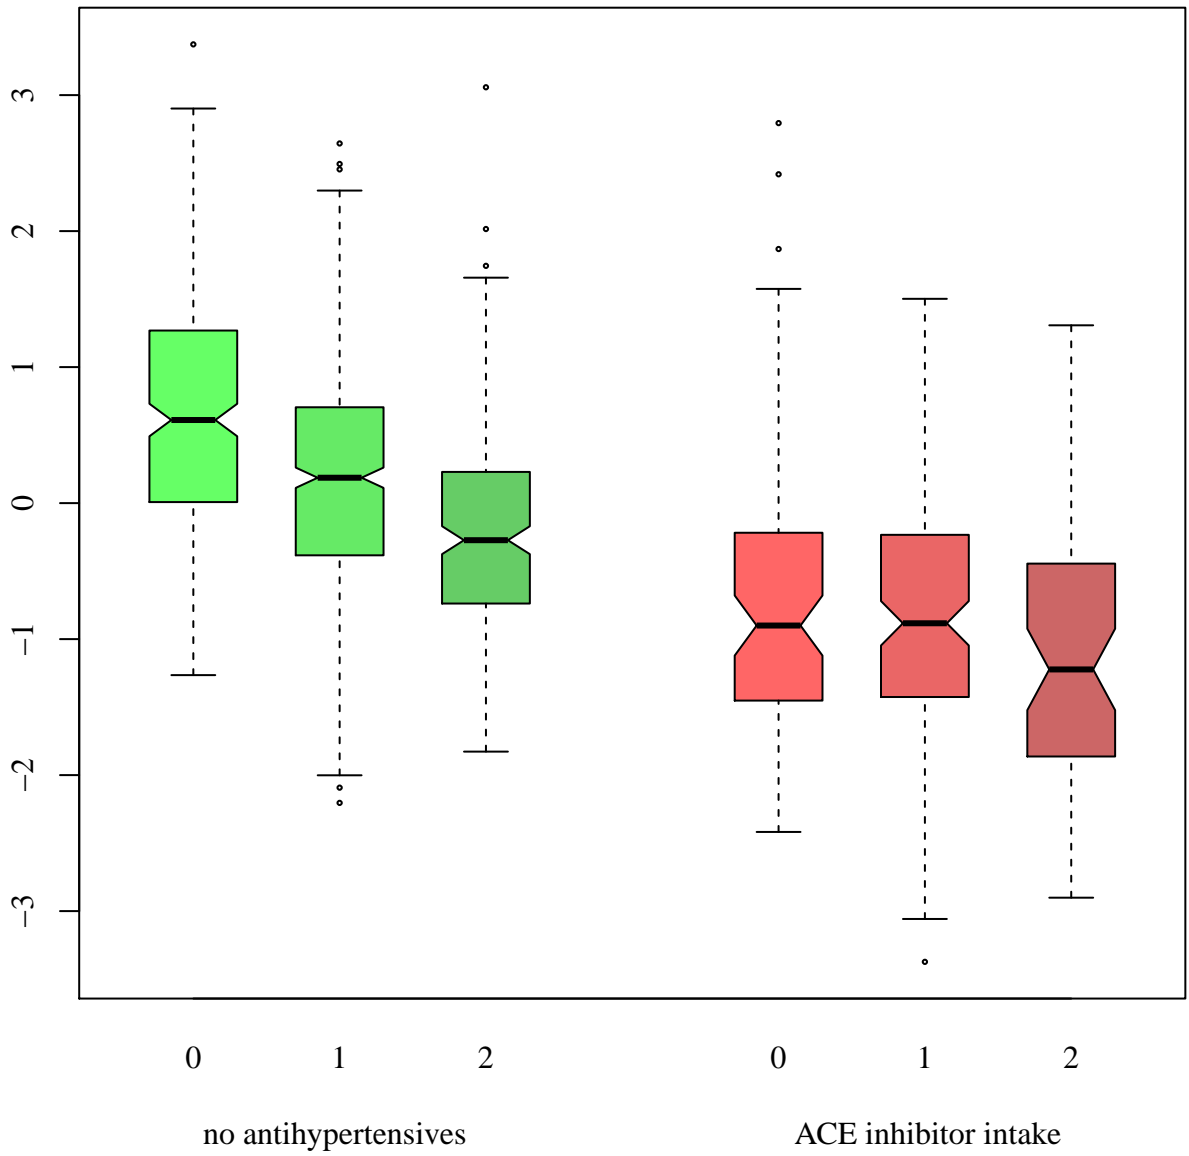

**aspartylphenylalanine/X14450 – rs1055086**

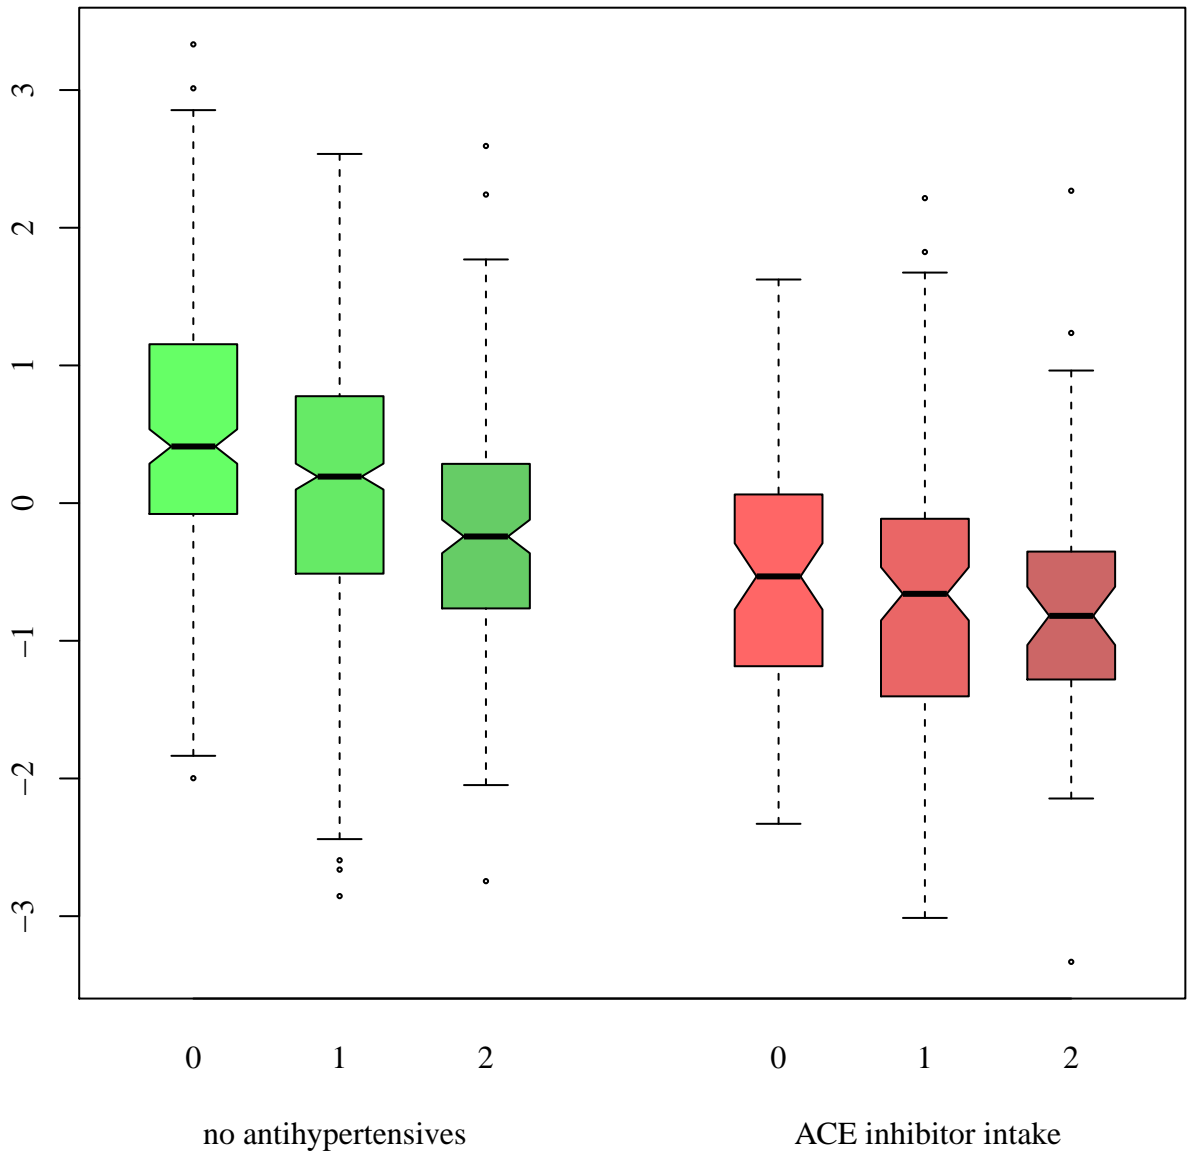

**X14086 – rs1055086**

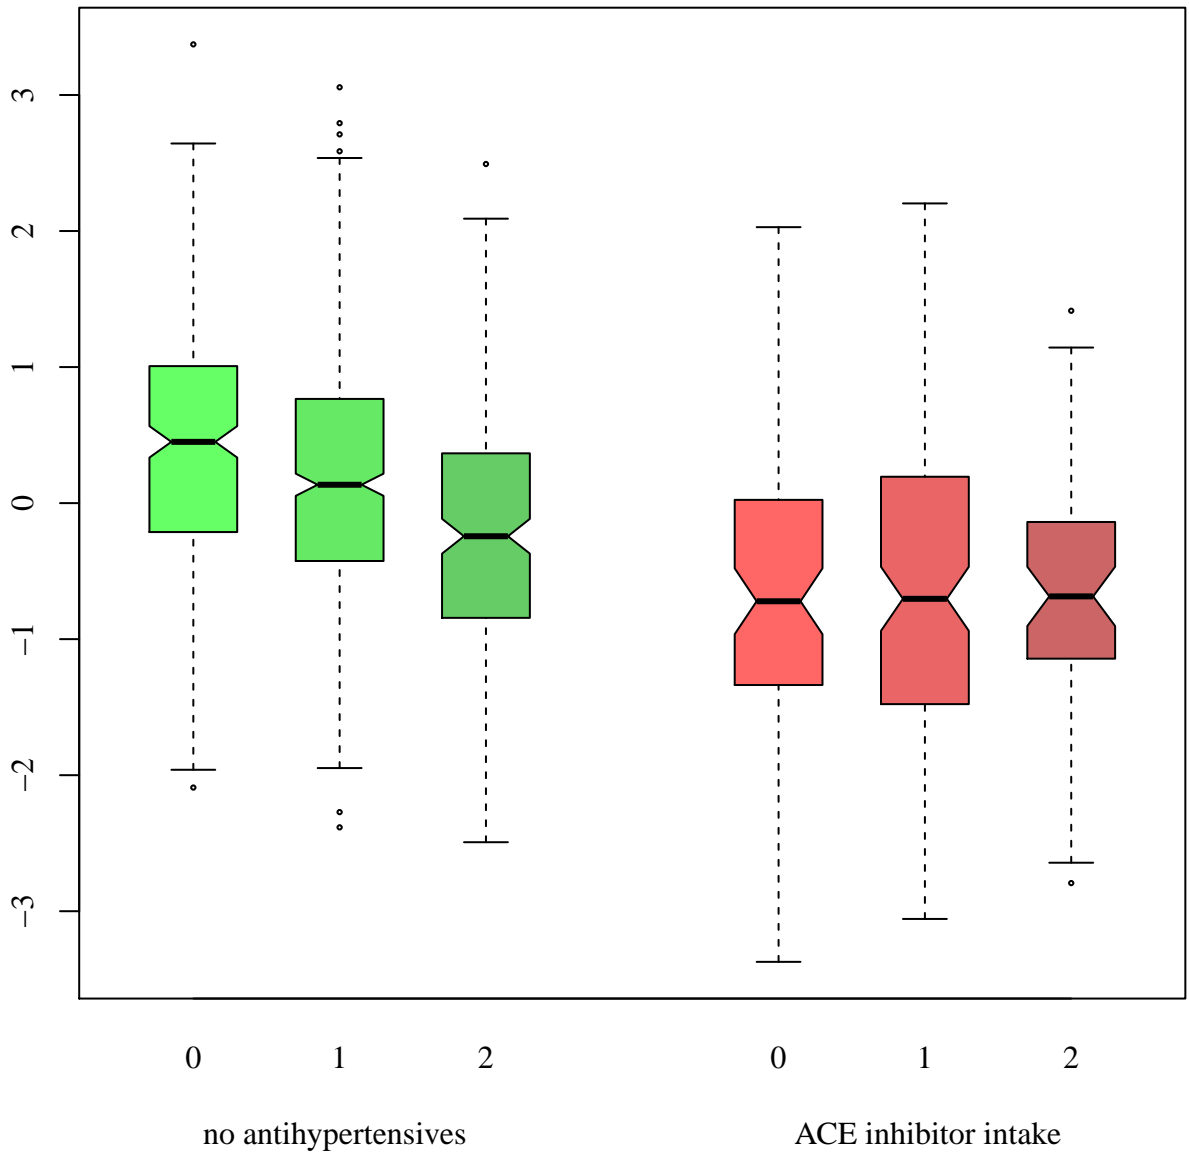

**X14189 – rs1055086**

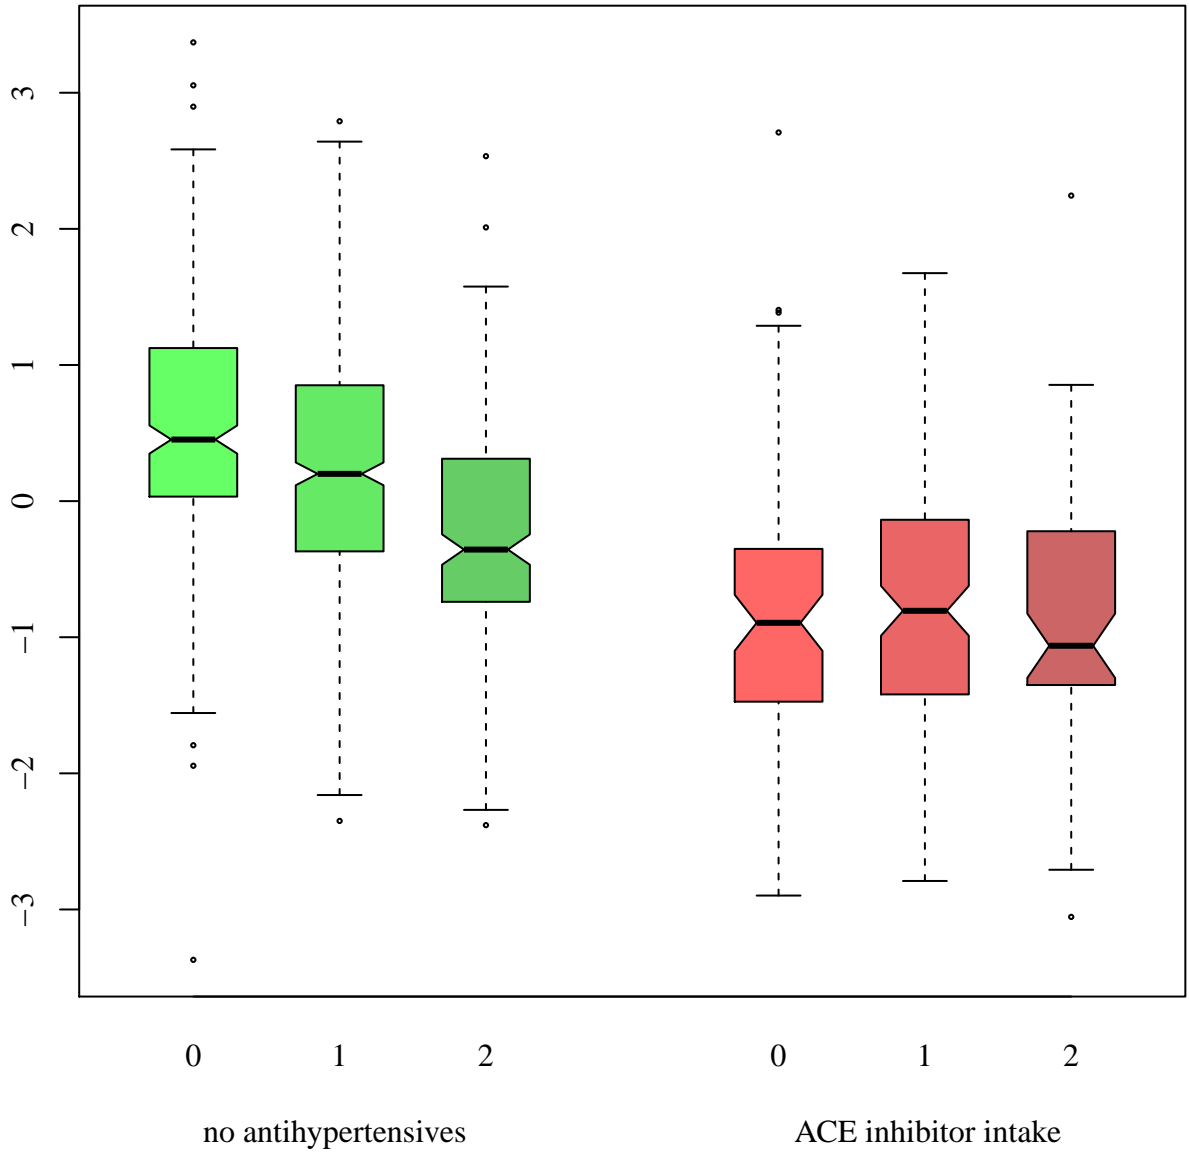

**X14205 – rs1055086**

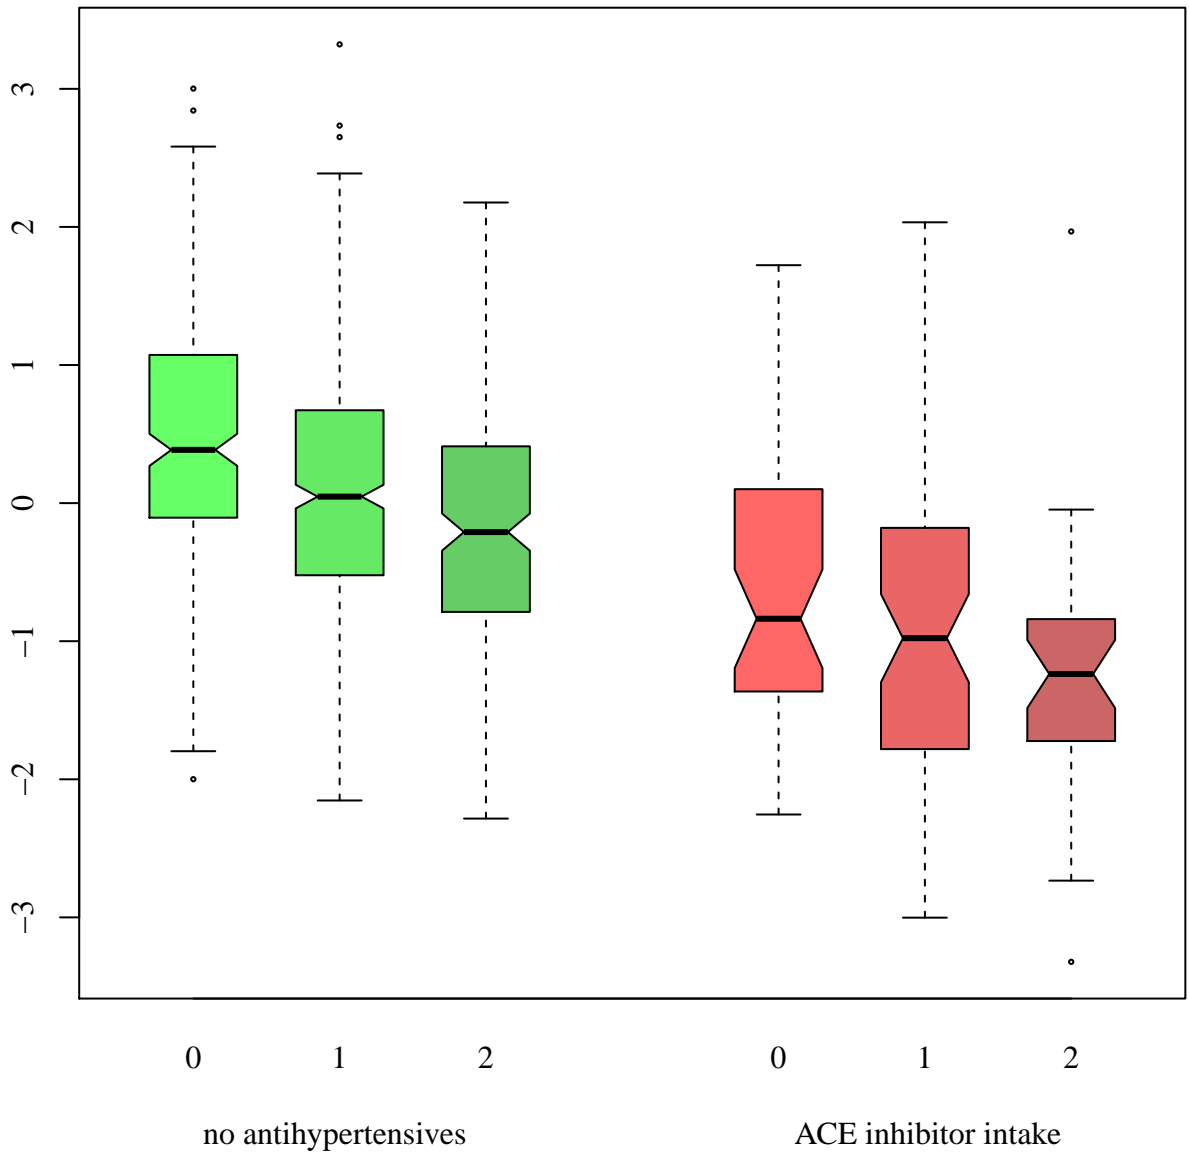



**X14208 – rs1055086**

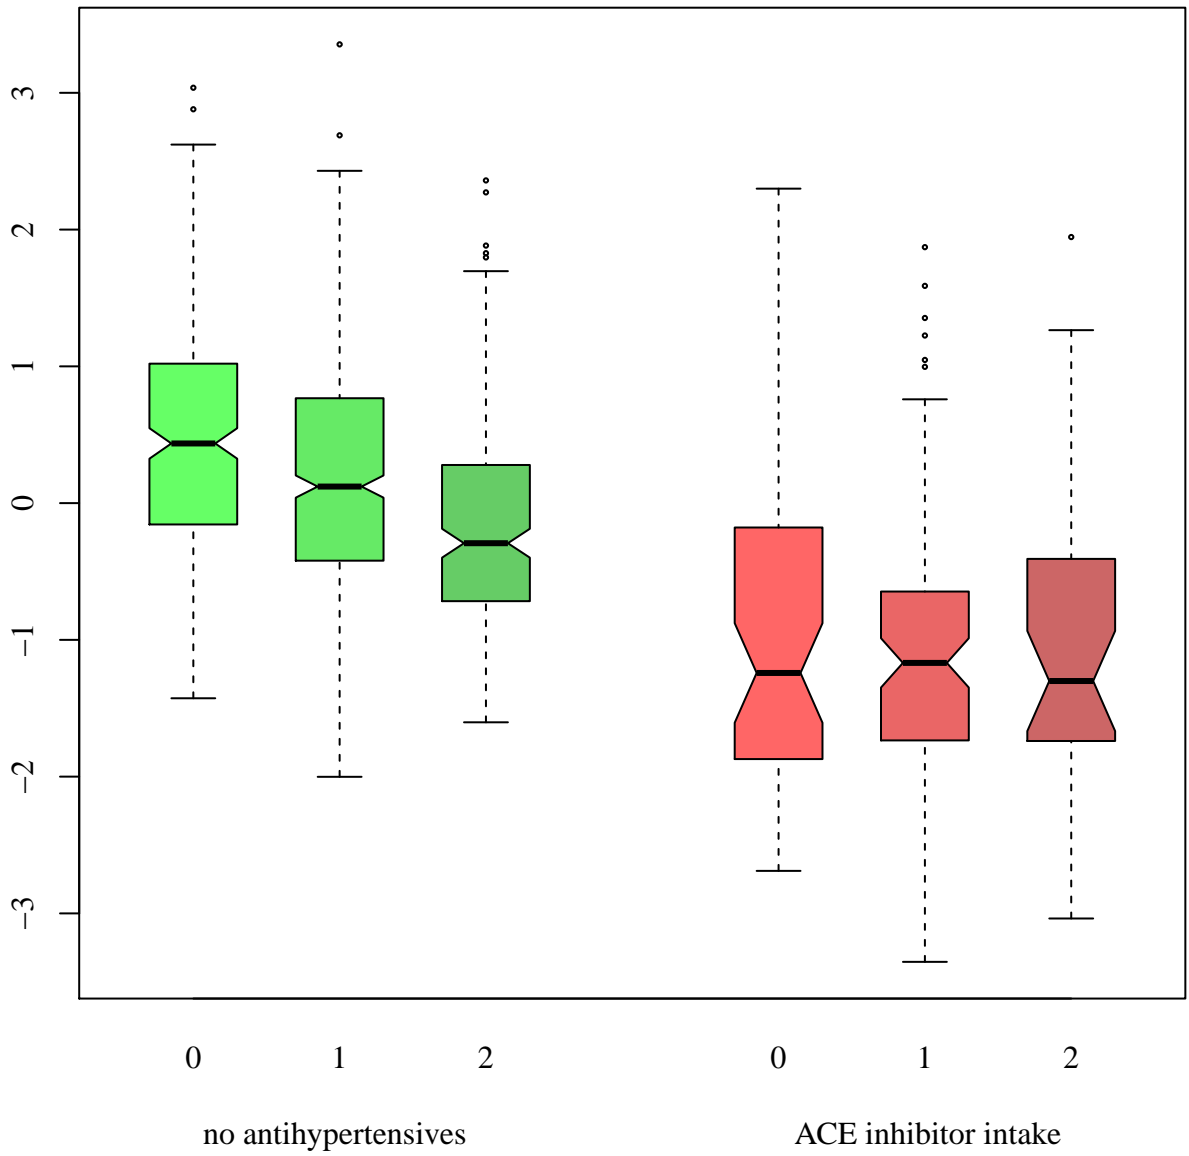

**X14304 – rs1055086**

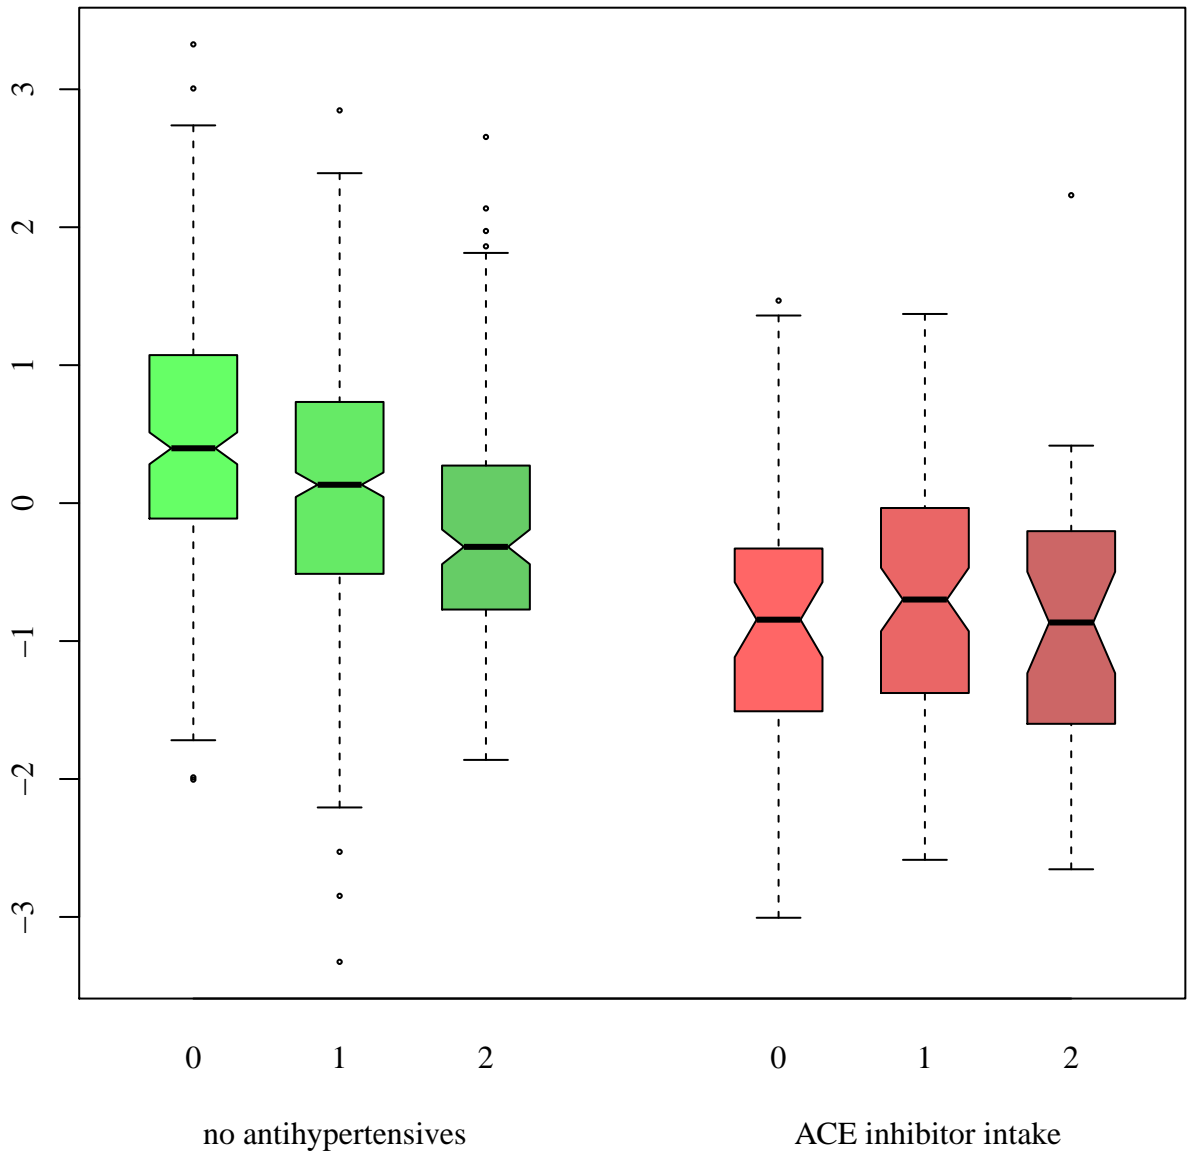

Supplement: pone.0153163.s005.pdf [file pone.0153163.s005.pdf]
