# Supplementary material for: The Pharmacogenetic Footprint of ACE Inhibition: A Population-Based Metabolomics Study
Source: PubMed Central journal article supplement (PMC4847917; doi:10.1371/journal.pone.0153163), 2016-04-27

**The Pharmacogenetic Footprint of ACE Inhibition: a Population-Based  
Metabolomics Study**

Authors:

Elisabeth Altmaier, Cristina Menni, Margit Heier, Christa Meisinger, Barbara Thorand, Jan Quell,  
Michael Kobl, Werner Römisch-Margl, Ana M Valdes, Massimo Mangino, Melanie Waldenberger,  
Konstantin Strauch, Thomas Illig, Jerzy Adamski, Tim Spector, Christian Gieger, Karsten Suhre,  
Gabi Kastenmüller

Journal: PLOS One

Corresponding author:

Gabi Kastenmüller

Helmholtz Zentrum München, German Research Center for Environmental Health,

Ingolstädter Landstr. 1,

D-85764 Neuherberg, Germany

e-mail: [g.kastenmueller@helmholtz-muenchen.de](mailto:g.kastenmueller@helmholtz-muenchen.de)

**S1 Fig:** Usage of the agents within the class “ACE inhibitors”.

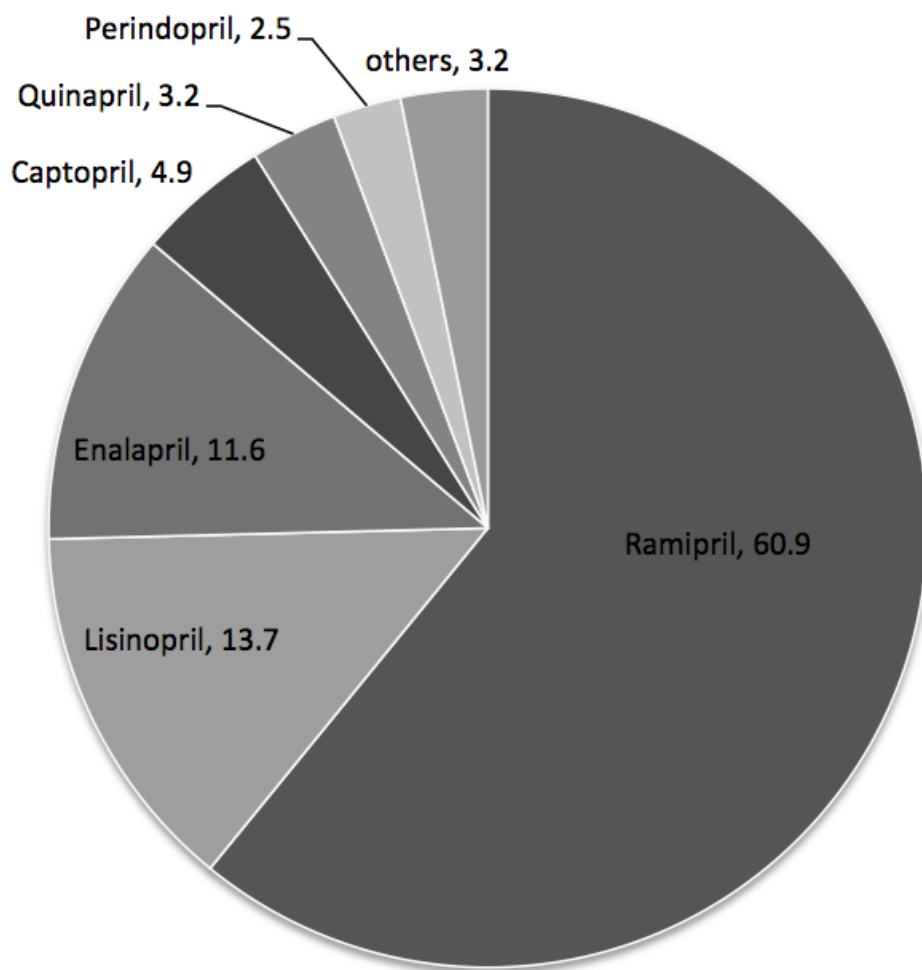

Supplement: pone.0153163.s001.pdf [file pone.0153163.s001.pdf]
