# Supplementary material for: The Pharmacogenetic Footprint of ACE Inhibition: A Population-Based Metabolomics Study
Source: PubMed Central journal article supplement (PMC4847917; doi:10.1371/journal.pone.0153163), 2016-04-27
Supplement: pone.0153163.s002.pdf [file pone.0153163.s002.pdf]

**The Pharmacogenetic Footprint of ACE Inhibition: a Population-Based  
Metabolomics Study**

Authors:

Elisabeth Altmaier, Cristina Menni, Margit Heier, Christa Meisinger, Barbara Thorand, Jan Quell,  
Michael Kobl, Werner Römisch-Margl, Ana M Valdes, Massimo Mangino, Melanie Waldenberger,  
Konstantin Strauch, Thomas Illig, Jerzy Adamski, Tim Spector, Christian Gieger, Karsten Suhre,  
Gabi Kastenmüller

Journal: PLOS One

Corresponding author:

Gabi Kastenmüller

Helmholtz Zentrum München, German Research Center for Environmental Health,

Ingolstädter Landstr. 1,

D-85764 Neuherberg, Germany

e-mail: [g.kastenmueller@helmholtz-muenchen.de](mailto:g.kastenmueller@helmholtz-muenchen.de)

**S1 Table:** Characteristics of the population related to the intake of ACE inhibitors

|                                   | <b>Intake of ACE inhibitors</b> |                                              |
|-----------------------------------|---------------------------------|----------------------------------------------|
|                                   | <b>Mean (SD) or n (%)</b>       |                                              |
|                                   | <b>Yes<br/>(n=282)</b>          | <b>No<br/>antihypertensives<br/>(n=1079)</b> |
| <b>Age</b>                        | 65.97 (7.7)                     | 58.04 (8.2)                                  |
| <b>Gender</b>                     |                                 |                                              |
| Male                              | 165 (12.1)                      | 493 (36.2)                                   |
| Female                            | 117 (8.6)                       | 586 (43.1)                                   |
| <b>HDL-cholesterol (mmol/l)</b>   | 1.34 (0.3)                      | 1.51 (0.3)                                   |
| <b>LDL-cholesterol (mmol/l)</b>   | 3.42 (0.8)                      | 3.71 (0.9)                                   |
| <b>Total cholesterol (mmol/l)</b> | 5.47 (0.9)                      | 5.85 (1.0)                                   |
| <b>Triglycerides (mmol/l)</b>     | 1.69 (1.0)                      | 1.44 (1.1)                                   |
| <b>BMI kg/m<sup>2</sup></b>       | 30.55 (5.0)                     | 26.94 (4.2)                                  |
| <b>Diabetes mellitus</b>          |                                 |                                              |
| Yes                               | 70 (5.1)                        | 39 (2.9)                                     |
| No                                | 212 (15.6)                      | 1039 (76.3)                                  |
| <b>Hypertension</b>               |                                 |                                              |
| Yes                               | 261 (19.2)                      | 51 (3.7)                                     |
| No                                | 21 (1.5)                        | 1026 (75.4)                                  |
| <b>Intake of beta-blockers</b>    |                                 |                                              |
| Yes                               | 139 (10.2)                      | 0 (0)                                        |
| No                                | 143 (10.5)                      | 1079 (79.3)                                  |
| <b>Intake of diuretics</b>        |                                 |                                              |
| Yes                               | 178 (13.1)                      | 0 (0)                                        |
| No                                | 104 (7.6)                       | 1079 (79.3)                                  |
