# Supplementary material for: The Pharmacogenetic Footprint of ACE Inhibition: A Population-Based Metabolomics Study
Source: PubMed Central journal article supplement (PMC4847917; doi:10.1371/journal.pone.0153163), 2016-04-27
Supplement: pone.0153163.s003.pdf [file pone.0153163.s003.pdf]

**The Pharmacogenetic Footprint of ACE Inhibition: a Population-Based  
Metabolomics Study**

Authors:

Elisabeth Altmaier, Cristina Menni, Margit Heier, Christa Meisinger, Barbara Thorand, Jan Quell,  
Michael Kobl, Werner Römisch-Margl, Ana M Valdes, Massimo Mangino, Melanie Waldenberger,  
Konstantin Strauch, Thomas Illig, Jerzy Adamski, Tim Spector, Christian Gieger, Karsten Suhre,  
Gabi Kastenmüller

Journal: PLOS One

Corresponding author:

Gabi Kastenmüller

Helmholtz Zentrum München, German Research Center for Environmental Health,

Ingolstädter Landstr. 1,

D-85764 Neuherberg, Germany

e-mail: [g.kastenmueller@helmholtz-muenchen.de](mailto:g.kastenmueller@helmholtz-muenchen.de)

**S2 Table:** Metabolites measured in KORA F4.

For each metabolite we report the super-pathway, pathway and measurement platform. The biochemical identity of the metabolites is in general determined using adequate pure substances; in cases where metabolite identities were inferred based on their fragmentation spectrum and other biochemical evidence, these are indicated by a '\*'.

| metabolite                     | super-pathway | pathway                                       | platform  |
|--------------------------------|---------------|-----------------------------------------------|-----------|
| alanine                        | Amino acid    | Alanine and aspartate metabolism              | GC/MS     |
| asparagine                     | Amino acid    | Alanine and aspartate metabolism              | GC/MS     |
| aspartate                      | Amino acid    | Alanine and aspartate metabolism              | GC/MS     |
| N-acetylalanine                | Amino acid    | Alanine and aspartate metabolism              | LC/MS neg |
| 2-aminobutyrate                | Amino acid    | Butanoate metabolism                          | LC/MS pos |
| creatine                       | Amino acid    | Creatine metabolism                           | LC/MS pos |
| creatinine                     | Amino acid    | Creatine metabolism                           | LC/MS pos |
| 2-hydroxybutyrate (AHB)        | Amino acid    | Cysteine, methionine, SAM, taurine metabolism | GC/MS     |
| cysteine                       | Amino acid    | Cysteine, methionine, SAM, taurine metabolism | GC/MS     |
| cystine                        | Amino acid    | Cysteine, methionine, SAM, taurine metabolism | GC/MS     |
| methionine                     | Amino acid    | Cysteine, methionine, SAM, taurine metabolism | LC/MS neg |
| glutamate                      | Amino acid    | Glutamate metabolism                          | GC/MS     |
| glutamine                      | Amino acid    | Glutamate metabolism                          | LC/MS pos |
| pyroglutamine*                 | Amino acid    | Glutamate metabolism                          | LC/MS pos |
| 5-oxoproline                   | Amino acid    | Glutathione metabolism                        | LC/MS pos |
| cysteine-glutathione disulfide | Amino acid    | Glutathione metabolism                        | LC/MS pos |
| betaine                        | Amino acid    | Glycine, serine and threonine metabolism      | LC/MS pos |
| glycine                        | Amino acid    | Glycine, serine and threonine metabolism      | GC/MS     |
| N-(2-furoyl)glycine            | Amino acid    | Glycine, serine and threonine metabolism      | LC/MS pos |
| N-acetylglycine                | Amino acid    | Glycine, serine and threonine metabolism      | GC/MS     |
| N-acetylthreonine              | Amino acid    | Glycine, serine and threonine metabolism      | LC/MS neg |
| serine                         | Amino acid    | Glycine, serine and threonine metabolism      | GC/MS     |
| threonine                      | Amino acid    | Glycine, serine and threonine metabolism      | LC/MS pos |

|                                     |            |                                     |           |
|-------------------------------------|------------|-------------------------------------|-----------|
| 4-acetamidobutanoate                | Amino acid | Guanidino and acetamido metabolism  | LC/MS pos |
| 3-methylhistidine                   | Amino acid | Histidine metabolism                | LC/MS neg |
| histidine                           | Amino acid | Histidine metabolism                | LC/MS neg |
| glutaroyl carnitine                 | Amino acid | Lysine metabolism                   | LC/MS pos |
| lysine                              | Amino acid | Lysine metabolism                   | LC/MS pos |
| pipecolate                          | Amino acid | Lysine metabolism                   | LC/MS pos |
| 3-(3-hydroxyphenyl)propionate       | Amino acid | Phenylalanine & tyrosine metabolism | LC/MS neg |
| 3-(4-hydroxyphenyl)lactate          | Amino acid | Phenylalanine & tyrosine metabolism | LC/MS neg |
| 3-methoxytyrosine                   | Amino acid | Phenylalanine & tyrosine metabolism | LC/MS pos |
| 3-phenylpropionate (hydrocinnamate) | Amino acid | Phenylalanine & tyrosine metabolism | LC/MS neg |
| 4-hydroxyphenylacetate              | Amino acid | Phenylalanine & tyrosine metabolism | GC/MS     |
| p-cresol sulfate                    | Amino acid | Phenylalanine & tyrosine metabolism | LC/MS neg |
| phenol sulfate                      | Amino acid | Phenylalanine & tyrosine metabolism | LC/MS neg |
| phenylacetate                       | Amino acid | Phenylalanine & tyrosine metabolism | LC/MS neg |
| phenylacetylglutamine               | Amino acid | Phenylalanine & tyrosine metabolism | LC/MS pos |
| phenylalanine                       | Amino acid | Phenylalanine & tyrosine metabolism | LC/MS pos |
| phenyllactate (PLA)                 | Amino acid | Phenylalanine & tyrosine metabolism | LC/MS neg |
| tyrosine                            | Amino acid | Phenylalanine & tyrosine metabolism | LC/MS pos |
| 3-indoxyl sulfate                   | Amino acid | Tryptophan metabolism               | LC/MS neg |
| C-glycosyltryptophan*               | Amino acid | Tryptophan metabolism               | LC/MS pos |
| indoleacetate                       | Amino acid | Tryptophan metabolism               | LC/MS pos |
| indolelactate                       | Amino acid | Tryptophan metabolism               | LC/MS pos |
| indolepropionate                    | Amino acid | Tryptophan metabolism               | LC/MS pos |
| kynurenine                          | Amino acid | Tryptophan metabolism               | LC/MS pos |
| serotonin (5HT)                     | Amino acid | Tryptophan metabolism               | LC/MS pos |

|                                |            |                                             |           |
|--------------------------------|------------|---------------------------------------------|-----------|
| tryptophan                     | Amino acid | Tryptophan metabolism                       | LC/MS pos |
| arginine                       | Amino acid | Urea cycle; arginine-, proline-, metabolism | LC/MS neg |
| citrulline                     | Amino acid | Urea cycle; arginine-, proline-, metabolism | LC/MS pos |
| dimethylarginine (SDMA + ADMA) | Amino acid | Urea cycle; arginine-, proline-, metabolism | LC/MS pos |
| homocitrulline                 | Amino acid | Urea cycle; arginine-, proline-, metabolism | LC/MS pos |
| homostachydrine*               | Amino acid | Urea cycle; arginine-, proline-, metabolism | LC/MS pos |
| N-acetylornithine              | Amino acid | Urea cycle; arginine-, proline-, metabolism | LC/MS pos |
| ornithine                      | Amino acid | Urea cycle; arginine-, proline-, metabolism | LC/MS pos |
| proline                        | Amino acid | Urea cycle; arginine-, proline-, metabolism | LC/MS pos |
| stachydrine                    | Amino acid | Urea cycle; arginine-, proline-, metabolism | LC/MS pos |
| trans-4-hydroxyproline         | Amino acid | Urea cycle; arginine-, proline-, metabolism | GC/MS     |
| urea                           | Amino acid | Urea cycle; arginine-, proline-, metabolism | GC/MS     |
| 2-hydroxyisobutyrate           | Amino acid | Valine, leucine and isoleucine metabolism   | GC/MS     |
| 2-methylbutyrylcarnitine       | Amino acid | Valine, leucine and isoleucine metabolism   | LC/MS pos |
| 3-hydroxy-2-ethylpropionate    | Amino acid | Valine, leucine and isoleucine metabolism   | GC/MS     |
| 3-methyl-2-oxobutyrate         | Amino acid | Valine, leucine and isoleucine metabolism   | LC/MS neg |
| 3-methyl-2-oxovalerate         | Amino acid | Valine, leucine and isoleucine metabolism   | LC/MS neg |
| 4-methyl-2-oxopentanoate       | Amino acid | Valine, leucine and isoleucine metabolism   | LC/MS neg |
| alpha-hydroxyisovalerate       | Amino acid | Valine, leucine and isoleucine metabolism   | LC/MS neg |
| beta-hydroxyisovalerate        | Amino acid | Valine, leucine and isoleucine metabolism   | LC/MS neg |
| hydroxyisovaleroyl carnitine   | Amino acid | Valine, leucine and isoleucine metabolism   | LC/MS pos |
| isobutyrylcarnitine            | Amino acid | Valine, leucine and isoleucine metabolism   | LC/MS pos |
| isoleucine                     | Amino acid | Valine, leucine and isoleucine metabolism   | LC/MS pos |
| isovalerylcarnitine            | Amino acid | Valine, leucine and isoleucine metabolism   | LC/MS pos |
| leucine                        | Amino acid | Valine, leucine and isoleucine metabolism   | LC/MS pos |

|                              |                        |                                                              |                  |
|------------------------------|------------------------|--------------------------------------------------------------|------------------|
| levulinate (4-oxovalerate)   | Amino acid             | Valine, leucine and isoleucine metabolism                    | LC/MS pos or neg |
| tiglyl carnitine             | Amino acid             | Valine, leucine and isoleucine metabolism                    | LC/MS pos        |
| valine                       | Amino acid             | Valine, leucine and isoleucine metabolism                    | LC/MS pos        |
| erythronate*                 | Carbohydrate           | Aminosugars metabolism                                       | GC/MS            |
| erythrose                    | Carbohydrate           | Fructose, mannose, galactose, starch, and sucrose metabolism | GC/MS            |
| fructose                     | Carbohydrate           | Fructose, mannose, galactose, starch, and sucrose metabolism | GC/MS            |
| mannitol                     | Carbohydrate           | Fructose, mannose, galactose, starch, and sucrose metabolism | GC/MS            |
| mannose                      | Carbohydrate           | Fructose, mannose, galactose, starch, and sucrose metabolism | GC/MS            |
| 1,5-anhydroglucitol (1,5-AG) | Carbohydrate           | Glycolysis, gluconeogenesis, pyruvate metabolism             | LC/MS neg        |
| 1,6-anhydroglucose           | Carbohydrate           | Glycolysis, gluconeogenesis, pyruvate metabolism             | GC/MS            |
| glucose                      | Carbohydrate           | Glycolysis, gluconeogenesis, pyruvate metabolism             | GC/MS            |
| glycerate                    | Carbohydrate           | Glycolysis, gluconeogenesis, pyruvate metabolism             | GC/MS            |
| lactate                      | Carbohydrate           | Glycolysis, gluconeogenesis, pyruvate metabolism             | GC/MS            |
| pyruvate                     | Carbohydrate           | Glycolysis, gluconeogenesis, pyruvate metabolism             | GC/MS            |
| arabinose                    | Carbohydrate           | Nucleotide sugars, pentose metabolism                        | GC/MS            |
| arabitol                     | Carbohydrate           | Nucleotide sugars, pentose metabolism                        | GC/MS            |
| threitol                     | Carbohydrate           | Nucleotide sugars, pentose metabolism                        | GC/MS            |
| ascorbate (Vitamin C)        | Cofactors and vitamins | Ascorbate and aldarate metabolism                            | GC/MS            |
| threonate                    | Cofactors and vitamins | Ascorbate and aldarate metabolism                            | GC/MS            |
| heme*                        | Cofactors and vitamins | Hemoglobin and porphyrin                                     | LC/MS pos        |

|                                    |                        |                                        |           |
|------------------------------------|------------------------|----------------------------------------|-----------|
| bilirubin (E,E)*                   | Cofactors and vitamins | Hemoglobin and porphyrin metabolism    | LC/MS pos |
| bilirubin (E,Z or Z,E)*            | Cofactors and vitamins | Hemoglobin and porphyrin metabolism    | LC/MS pos |
| bilirubin (Z,Z)                    | Cofactors and vitamins | Hemoglobin and porphyrin metabolism    | LC/MS neg |
| biliverdin                         | Cofactors and vitamins | Hemoglobin and porphyrin metabolism    | LC/MS neg |
| trigonelline (N'-methylnicotinate) | Cofactors and vitamins | Nicotinate and nicotinamide metabolism | LC/MS pos |
| pantothenate                       | Cofactors and vitamins | Pantothenate and CoA metabolism        | LC/MS pos |
| riboflavin (Vitamin B2)            | Cofactors and vitamins | Riboflavin metabolism                  | LC/MS pos |
| alpha-tocopherol                   | Cofactors and vitamins | Tocopherol metabolism                  | GC/MS     |
| gamma-tocopherol                   | Cofactors and vitamins | Tocopherol metabolism                  | GC/MS     |
| pyridoxate                         | Cofactors and vitamins | Vitamin B6 metabolism                  | LC/MS neg |
| alpha-ketoglutarate                | Energy                 | Krebs cycle                            | GC/MS     |
| citrate                            | Energy                 | Krebs cycle                            | GC/MS     |
| malate                             | Energy                 | Krebs cycle                            | GC/MS     |
| succinylcarnitine                  | Energy                 | Krebs cycle                            | LC/MS pos |
| acetylphosphate                    | Energy                 | Oxidative phosphorylation              | GC/MS     |
| phosphate                          | Energy                 | Oxidative phosphorylation              | LC/MS neg |
| cholate                            | Lipid                  | Bile acid metabolism                   | LC/MS neg |
| deoxycholate                       | Lipid                  | Bile acid metabolism                   | LC/MS neg |
| glycochenodeoxycholate             | Lipid                  | Bile acid metabolism                   | LC/MS neg |
| glycocholate                       | Lipid                  | Bile acid metabolism                   | LC/MS pos |
| glycodeoxycholate                  | Lipid                  | Bile acid metabolism                   | LC/MS neg |
| hyodeoxycholate                    | Lipid                  | Bile acid metabolism                   | LC/MS neg |
| taurochenodeoxycholate             | Lipid                  | Bile acid metabolism                   | LC/MS neg |
| taurocholate                       | Lipid                  | Bile acid metabolism                   | LC/MS neg |
| taurodeoxycholate                  | Lipid                  | Bile acid metabolism                   | LC/MS neg |

|                                                      |       |                                                 |           |
|------------------------------------------------------|-------|-------------------------------------------------|-----------|
| tauroolithocholate 3-sulfate                         | Lipid | Bile acid metabolism                            | LC/MS neg |
| ursodeoxycholate                                     | Lipid | Bile acid metabolism                            | LC/MS neg |
| 2-tetradecenoyl carnitine                            | Lipid | Carnitine metabolism                            | LC/MS pos |
| 3-dehydrocarnitine*                                  | Lipid | Carnitine metabolism                            | LC/MS pos |
| acetylcarnitine                                      | Lipid | Carnitine metabolism                            | LC/MS pos |
| carnitine                                            | Lipid | Carnitine metabolism                            | LC/MS pos |
| decanoylcarnitine                                    | Lipid | Carnitine metabolism                            | LC/MS pos |
| hexanoylcarnitine                                    | Lipid | Carnitine metabolism                            | LC/MS pos |
| laurylcarnitine                                      | Lipid | Carnitine metabolism                            | LC/MS pos |
| octanoylcarnitine                                    | Lipid | Carnitine metabolism                            | LC/MS pos |
| oleoylcarnitine                                      | Lipid | Carnitine metabolism                            | LC/MS pos |
| palmitoylcarnitine                                   | Lipid | Carnitine metabolism                            | LC/MS pos |
| stearoylcarnitine                                    | Lipid | Carnitine metabolism                            | LC/MS pos |
| thromboxane B2                                       | Lipid | Eicosanoid                                      | LC/MS neg |
| dihomo-linolenate (20:3n3 or n6)                     | Lipid | Essential fatty acid                            | LC/MS neg |
| docosahexaenoate (DHA; 22:6n3)                       | Lipid | Essential fatty acid                            | LC/MS neg |
| docosapentaenoate (n3 DPA; 22:5n3)                   | Lipid | Essential fatty acid                            | LC/MS neg |
| eicosapentaenoate (EPA; 20:5n3)                      | Lipid | Essential fatty acid                            | LC/MS neg |
| linolenate [alpha or gamma; (18:3n3 or 6)]           | Lipid | Essential fatty acid                            | LC/MS neg |
| isovalerate                                          | Lipid | Fatty acid metabolism                           | LC/MS neg |
| butyrylcarnitine                                     | Lipid | Fatty acid metabolism<br>(also BCAA metabolism) | LC/MS pos |
| propionylcarnitine                                   | Lipid | Fatty acid metabolism<br>(also BCAA metabolism) | LC/MS pos |
| linoleamide (18:2n6)                                 | Lipid | Fatty acid, amide                               | LC/MS pos |
| oleamide                                             | Lipid | Fatty acid, amide                               | LC/MS pos |
| 3-carboxy-4-methyl-5-propyl-2-furanpropanoate (CMPF) | Lipid | Fatty acid, dicarboxylate                       | LC/MS neg |

|                                |       |                           |           |
|--------------------------------|-------|---------------------------|-----------|
| dodecanedioate                 | Lipid | Fatty acid, dicarboxylate | LC/MS neg |
| hexadecanedioate               | Lipid | Fatty acid, dicarboxylate | LC/MS neg |
| octadecanedioate               | Lipid | Fatty acid, dicarboxylate | LC/MS neg |
| sebacate (decanedioate)        | Lipid | Fatty acid, dicarboxylate | LC/MS neg |
| tetradecanedioate              | Lipid | Fatty acid, dicarboxylate | LC/MS neg |
| n-Butyl Oleate                 | Lipid | Fatty acid, ester         | GC/MS     |
| 2-hydroxypalmitate             | Lipid | Fatty acid, monohydroxy   | LC/MS neg |
| 2-hydroxystearate              | Lipid | Fatty acid, monohydroxy   | LC/MS neg |
| choline                        | Lipid | Glycerolipid metabolism   | LC/MS pos |
| glycerol                       | Lipid | Glycerolipid metabolism   | GC/MS     |
| glycerol 3-phosphate (G3P)     | Lipid | Glycerolipid metabolism   | GC/MS     |
| glycerophosphorylcholine (GPC) | Lipid | Glycerolipid metabolism   | LC/MS pos |
| inositol 1-phosphate (I1P)     | Lipid | Inositol metabolism       | GC/MS     |
| myo-inositol                   | Lipid | Inositol metabolism       | GC/MS     |
| scyllo-inositol                | Lipid | Inositol metabolism       | GC/MS     |
| 3-hydroxybutyrate (BHBA)       | Lipid | Ketone bodies             | GC/MS     |
| 10-heptadecenoate (17:1n7)     | Lipid | Long chain fatty acid     | LC/MS neg |
| 10-nonadecenoate (19:1n9)      | Lipid | Long chain fatty acid     | LC/MS neg |
| adrenate (22:4n6)              | Lipid | Long chain fatty acid     | LC/MS neg |
| arachidonate (20:4n6)          | Lipid | Long chain fatty acid     | LC/MS neg |
| dihomo-linoleate (20:2n6)      | Lipid | Long chain fatty acid     | LC/MS neg |
| eicosenoate (20:1n9 or 11)     | Lipid | Long chain fatty acid     | LC/MS neg |
| linoleate (18:2n6)             | Lipid | Long chain fatty acid     | LC/MS neg |
| margarate (17:0)               | Lipid | Long chain fatty acid     | LC/MS neg |
| myristate (14:0)               | Lipid | Long chain fatty acid     | LC/MS neg |



|                                           |       |                       |           |
|-------------------------------------------|-------|-----------------------|-----------|
| myristoleate (14:1n5)                     | Lipid | Long chain fatty acid | LC/MS neg |
| nonadecanoate (19:0)                      | Lipid | Long chain fatty acid | LC/MS neg |
| oleate (18:1n9)                           | Lipid | Long chain fatty acid | LC/MS neg |
| palmitate (16:0)                          | Lipid | Long chain fatty acid | LC/MS neg |
| palmitoleate (16:1n7)                     | Lipid | Long chain fatty acid | LC/MS neg |
| pentadecanoate (15:0)                     | Lipid | Long chain fatty acid | GC/MS     |
| stearate (18:0)                           | Lipid | Long chain fatty acid | LC/MS neg |
| stearidonate (18:4n3)                     | Lipid | Long chain fatty acid | LC/MS neg |
| 1-arachidonoylglycerophosphocholine*      | Lipid | Lysolipid             | LC/MS pos |
| 1-arachidonoylglycerophosphoethanolamine* | Lipid | Lysolipid             | LC/MS neg |
| 1-arachidonoylglycerophosphoinositol*     | Lipid | Lysolipid             | LC/MS neg |
| 1-docosaheptaenoylglycerophosphocholine*  | Lipid | Lysolipid             | LC/MS pos |
| 1-eicosadienoylglycerophosphocholine*     | Lipid | Lysolipid             | LC/MS pos |
| 1-eicosatrienoylglycerophosphocholine*    | Lipid | Lysolipid             | LC/MS pos |
| 1-heptadecanoylglycerophosphocholine      | Lipid | Lysolipid             | LC/MS pos |
| 1-linoleoylglycerophosphocholine          | Lipid | Lysolipid             | LC/MS pos |
| 1-linoleoylglycerophosphoethanolamine*    | Lipid | Lysolipid             | LC/MS neg |
| 1-myristoylglycerophosphocholine          | Lipid | Lysolipid             | LC/MS pos |
| 1-oleoylglycerophosphocholine             | Lipid | Lysolipid             | LC/MS pos |
| 1-oleoylglycerophosphoethanolamine        | Lipid | Lysolipid             | LC/MS neg |
| 1-palmitoleoylglycerophosphocholine*      | Lipid | Lysolipid             | LC/MS pos |
| 1-palmitoylglycerophosphocholine          | Lipid | Lysolipid             | LC/MS pos |
| 1-palmitoylglycerophosphoethanolamine     | Lipid | Lysolipid             | LC/MS neg |
| 1-palmitoylglycerophosphoinositol*        | Lipid | Lysolipid             | LC/MS neg |
| 1-stearoylglycerophosphocholine           | Lipid | Lysolipid             | LC/MS pos |

|                                                   |       |                         |           |
|---------------------------------------------------|-------|-------------------------|-----------|
| 1-stearoylglycerophosphoethanolamine              | Lipid | Lysolipid               | LC/MS neg |
| 1-stearoylglycerophosphoinositol                  | Lipid | Lysolipid               | LC/MS neg |
| 2-linoleoylglycerophosphocholine*                 | Lipid | Lysolipid               | LC/MS pos |
| 2-linoleoylglycerophosphoethanolamine*            | Lipid | Lysolipid               | LC/MS neg |
| 2-oleoylglycerophosphocholine*                    | Lipid | Lysolipid               | LC/MS pos |
| 2-palmitoylglycerophosphocholine*                 | Lipid | Lysolipid               | LC/MS pos |
| 2-stearoylglycerophosphocholine*                  | Lipid | Lysolipid               | LC/MS pos |
| 10-undecenoate (11:1n1)                           | Lipid | Medium chain fatty acid | LC/MS neg |
| 5-dodecenoate (12:1n7)                            | Lipid | Medium chain fatty acid | LC/MS neg |
| caprate (10:0)                                    | Lipid | Medium chain fatty acid | LC/MS neg |
| caproate (6:0)                                    | Lipid | Medium chain fatty acid | LC/MS neg |
| caprylate (8:0)                                   | Lipid | Medium chain fatty acid | LC/MS neg |
| heptanoate (7:0)                                  | Lipid | Medium chain fatty acid | LC/MS neg |
| laurate (12:0)                                    | Lipid | Medium chain fatty acid | LC/MS neg |
| pelargonate (9:0)                                 | Lipid | Medium chain fatty acid | LC/MS neg |
| undecanoate (11:0)                                | Lipid | Medium chain fatty acid | LC/MS neg |
| 1-linoleoylglycerol (1-monolinolein)              | Lipid | Monoacylglycerol        | LC/MS neg |
| 1-oleoylglycerol (1-monoolein)                    | Lipid | Monoacylglycerol        | LC/MS pos |
| 1-palmitoylglycerol (1-monopalmitin)              | Lipid | Monoacylglycerol        | GC/MS     |
| 1-stearoylglycerol (1-monostearin)                | Lipid | Monoacylglycerol        | GC/MS     |
| valerate                                          | Lipid | Short chain fatty acid  | LC/MS neg |
| 7-alpha-hydroxy-3-oxo-4-cholestenoate<br>(7-Hoca) | Lipid | Sterol/Steroid          | LC/MS neg |
| androsterone sulfate                              | Lipid | Sterol/Steroid          | LC/MS neg |
| cholesterol                                       | Lipid | Sterol/Steroid          | GC/MS     |
| cortisol                                          | Lipid | Sterol/Steroid          | LC/MS pos |

|                                         |            |                                                            |           |
|-----------------------------------------|------------|------------------------------------------------------------|-----------|
| cortisone                               | Lipid      | Sterol/Steroid                                             | LC/MS pos |
| dehydroisoandrosterone sulfate (DHEA-S) | Lipid      | Sterol/Steroid                                             | LC/MS neg |
| epiandrosterone sulfate                 | Lipid      | Sterol/Steroid                                             | LC/MS neg |
| estrone 3-sulfate                       | Lipid      | Sterol/Steroid                                             | LC/MS neg |
| lathosterol                             | Lipid      | Sterol/Steroid                                             | GC/MS     |
| carbamazepine*                          |            |                                                            | LC/MS pos |
| hypoxanthine                            | Nucleotide | Purine metabolism,<br>(hypo)xanthine/inosine<br>containing | LC/MS neg |
| inosine                                 | Nucleotide | Purine metabolism,<br>(hypo)xanthine/inosine<br>containing | LC/MS neg |
| xanthine                                | Nucleotide | Purine metabolism,<br>(hypo)xanthine/inosine<br>containing | LC/MS pos |
| adenosine                               | Nucleotide | Purine metabolism,<br>adenine containing                   | LC/MS pos |
| N1-methyladenosine                      | Nucleotide | Purine metabolism,<br>adenine containing                   | LC/MS pos |
| 7-methylguanine                         | Nucleotide | Purine metabolism,<br>guanine containing                   | LC/MS pos |
| guanosine                               | Nucleotide | Purine metabolism,<br>guanine containing                   | LC/MS pos |
| N2,N2-dimethylguanosine                 | Nucleotide | Purine metabolism,<br>guanine containing                   | LC/MS pos |
| allantoin                               | Nucleotide | Purine metabolism, urate<br>metabolism                     | GC/MS     |
| urate                                   | Nucleotide | Purine metabolism, urate<br>metabolism                     | LC/MS neg |
| pseudouridine                           | Nucleotide | Pyrimidine metabolism,<br>uracil containing                | LC/MS pos |
| uridine                                 | Nucleotide | Pyrimidine metabolism,<br>uracil containing                | LC/MS neg |
| aspartylphenylalanine                   | Peptide    | Dipeptide                                                  | LC/MS pos |
| glycylvaline                            | Peptide    | Dipeptide                                                  | LC/MS pos |
| leucylleucine                           | Peptide    | Dipeptide                                                  | LC/MS pos |
| phenylalanylphenylalanine               | Peptide    | Dipeptide                                                  | LC/MS pos |
| pro-hydroxy-pro                         | Peptide    | Dipeptide                                                  | LC/MS pos |

|                                   |             |                             |           |
|-----------------------------------|-------------|-----------------------------|-----------|
| pyroglutamylglycine               | Peptide     | Dipeptide                   | LC/MS neg |
| ADpSGEGDFXAEGGGVR*                | Peptide     | Fibrinogen cleavage peptide | LC/MS pos |
| ADSGEGDFXAEGGGVR*                 | Peptide     | Fibrinogen cleavage peptide | LC/MS pos |
| DSGEGDFXAEGGGVR*                  | Peptide     | Fibrinogen cleavage peptide | LC/MS pos |
| gamma-glutamylglutamate           | Peptide     | gamma-glutamyl              | LC/MS pos |
| gamma-glutamylglutamine           | Peptide     | gamma-glutamyl              | LC/MS pos |
| gamma-glutamylisoleucine*         | Peptide     | gamma-glutamyl              | LC/MS pos |
| gamma-glutamylleucine             | Peptide     | gamma-glutamyl              | LC/MS pos |
| gamma-glutamylmethionine*         | Peptide     | gamma-glutamyl              | LC/MS pos |
| gamma-glutamylphenylalanine       | Peptide     | gamma-glutamyl              | LC/MS pos |
| gamma-glutamylthreonine*          | Peptide     | gamma-glutamyl              | LC/MS pos |
| gamma-glutamyltyrosine            | Peptide     | gamma-glutamyl              | LC/MS pos |
| gamma-glutamylvaline              | Peptide     | gamma-glutamyl              | LC/MS pos |
| bradykinin, des-arg(9)            | Peptide     | Polypeptide                 | LC/MS pos |
| HWESASXX*                         | Peptide     | Polypeptide                 | LC/MS pos |
| 2-hydroxyhippurate (salicylurate) | Xenobiotics | Benzoate metabolism         | LC/MS neg |
| 3-ethylphenylsulfate*             | Xenobiotics | Benzoate metabolism         | LC/MS neg |
| 4-ethylphenylsulfate              | Xenobiotics | Benzoate metabolism         | LC/MS neg |
| 4-vinylphenol sulfate             | Xenobiotics | Benzoate metabolism         | LC/MS neg |
| benzoate                          | Xenobiotics | Benzoate metabolism         | LC/MS neg |
| catechol sulfate                  | Xenobiotics | Benzoate metabolism         | LC/MS neg |
| hippurate                         | Xenobiotics | Benzoate metabolism         | LC/MS pos |
| glycerol 2-phosphate              | Xenobiotics | Chemical                    | GC/MS     |
| 2-hydroxyacetaminophen sulfate*   | Xenobiotics | Drug                        | LC/MS neg |
| 2-methoxyacetaminophen sulfate*   | Xenobiotics | Drug                        | LC/MS neg |

|                                |             |                                 |           |
|--------------------------------|-------------|---------------------------------|-----------|
| 3-(cystein-S-yl)acetaminophen* | Xenobiotics | Drug                            | LC/MS pos |
| 4-acetamidophenol              | Xenobiotics | Drug                            | GC/MS     |
| 4-acetaminophen sulfate        | Xenobiotics | Drug                            | LC/MS neg |
| hydroquinone sulfate           | Xenobiotics | Drug                            | LC/MS neg |
| hydroxy pioglitazone*          | Xenobiotics | Drug                            | LC/MS pos |
| ibuprofen                      | Xenobiotics | Drug                            | LC/MS neg |
| metoprolol                     | Xenobiotics | Drug                            | LC/MS pos |
| metoprolol acid metabolite*    | Xenobiotics | Drug                            | LC/MS pos |
| naproxen                       | Xenobiotics | Drug                            | LC/MS neg |
| p-acetamidophenylglucuronide   | Xenobiotics | Drug                            | LC/MS pos |
| pioglitazone*                  | Xenobiotics | Drug                            | LC/MS pos |
| salicylate                     | Xenobiotics | Drug                            | GC/MS     |
| salicyluric glucuronide*       | Xenobiotics | Drug                            | LC/MS neg |
| piperine                       | Xenobiotics | Food component/Plant            | LC/MS pos |
| quinate                        | Xenobiotics | Food component/Plant            | GC/MS     |
| saccharin                      | Xenobiotics | Food component/Plant            | LC/MS neg |
| thymol sulfate                 | Xenobiotics | Food component/Plant            | LC/MS neg |
| erythritol                     | Xenobiotics | Sugar, sugar substitute, starch | GC/MS     |
| cotinine                       | Xenobiotics | Tobacco metabolite              | LC/MS pos |
| 1,3,7-trimethylurate           | Xenobiotics | Xanthine metabolism             | LC/MS neg |
| 1,7-dimethylurate              | Xenobiotics | Xanthine metabolism             | LC/MS neg |
| 1-methylurate                  | Xenobiotics | Xanthine metabolism             | LC/MS pos |
| 1-methylxanthine               | Xenobiotics | Xanthine metabolism             | LC/MS pos |
| 3-methylxanthine               | Xenobiotics | Xanthine metabolism             | LC/MS pos |
| 7-methylxanthine               | Xenobiotics | Xanthine metabolism             | LC/MS pos |

|              |             |                     |           |
|--------------|-------------|---------------------|-----------|
| caffeine     | Xenobiotics | Xanthine metabolism | LC/MS pos |
| paraxanthine | Xenobiotics | Xanthine metabolism | LC/MS pos |
| theobromine  | Xenobiotics | Xanthine metabolism | LC/MS pos |
| theophylline | Xenobiotics | Xanthine metabolism | LC/MS neg |
| X- 01911     |             |                     | LC/MS pos |
| X- 02249     |             |                     | LC/MS neg |
| X- 02269     |             |                     | LC/MS neg |
| X- 02973     |             |                     | GC/MS     |
| X- 03003     |             |                     | GC/MS     |
| X- 03056     |             |                     | LC/MS pos |
| X- 03088     |             |                     | GC/MS     |
| X- 03090     |             |                     | GC/MS     |
| X- 03094     |             |                     | GC/MS     |
| X- 04357     |             |                     | GC/MS     |
| X- 04494     |             |                     | GC/MS     |
| X- 04495     |             |                     | GC/MS     |
| X- 04498     |             |                     | GC/MS     |
| X- 04499     |             |                     | GC/MS     |
| X- 04500     |             |                     | GC/MS     |
| X- 04515     |             |                     | GC/MS     |
| X- 04621     |             |                     | GC/MS     |
| X- 05426     |             |                     | GC/MS     |
| X- 05491     |             |                     | GC/MS     |
| X- 05907     |             |                     | GC/MS     |
| X- 06126     |             |                     | LC/MS neg |

|          |           |
|----------|-----------|
| X- 06226 | GC/MS     |
| X- 06227 | GC/MS     |
| X- 06246 | GC/MS     |
| X- 06267 | GC/MS     |
| X- 06307 | GC/MS     |
| X- 06350 | GC/MS     |
| X- 06351 | GC/MS     |
| X- 07765 | LC/MS neg |
| X- 08402 | GC/MS     |
| X- 08766 | GC/MS     |
| X- 08988 | GC/MS     |
| X- 09026 | GC/MS     |
| X- 09108 | GC/MS     |
| X- 09706 | GC/MS     |
| X- 09789 | LC/MS neg |
| X- 10346 | LC/MS neg |
| X- 10395 | GC/MS     |
| X- 10419 | GC/MS     |
| X- 10429 | GC/MS     |
| X- 10500 | GC/MS     |
| X- 10506 | GC/MS     |
| X- 10510 | GC/MS     |
| X- 10675 | GC/MS     |
| X- 10810 | GC/MS     |
| X- 11204 | LC/MS pos |

|          |   |           |
|----------|---|-----------|
| X- 11244 | 1 | LC/MS neg |
| X- 11247 |   | LC/MS neg |
| X- 11255 |   | LC/MS pos |
| X- 11261 |   | LC/MS pos |
| X- 11299 |   | LC/MS neg |
| X- 11315 |   | LC/MS pos |
| X- 11317 |   | LC/MS neg |
| X- 11319 |   | LC/MS neg |
| X- 11327 |   | LC/MS pos |
| X- 11334 |   | LC/MS pos |
| X- 11374 |   | LC/MS pos |
| X- 11381 |   | LC/MS pos |
| X- 11412 |   | LC/MS pos |
| X- 11421 |   | LC/MS pos |
| X- 11422 |   | LC/MS neg |
| X- 11423 |   | LC/MS neg |
| X- 11437 |   | LC/MS neg |
| X- 11438 |   | LC/MS neg |
| X- 11440 |   | LC/MS neg |
| X- 11441 |   | LC/MS neg |
| X- 11442 |   | LC/MS neg |
| X- 11443 |   | LC/MS neg |
| X- 11444 |   | LC/MS neg |
| X- 11445 |   | LC/MS neg |
| X- 11450 |   | LC/MS neg |



|          |           |
|----------|-----------|
| X- 11452 | LC/MS neg |
| X- 11469 | LC/MS pos |
| X- 11470 | LC/MS neg |
| X- 11478 | LC/MS neg |
| X- 11483 | LC/MS neg |
| X- 11485 | LC/MS neg |
| X- 11491 | LC/MS neg |
| X- 11497 | LC/MS neg |
| X- 11521 | LC/MS pos |
| X- 11529 | LC/MS neg |
| X- 11530 | LC/MS neg |
| X- 11537 | LC/MS pos |
| X- 11538 | LC/MS neg |
| X- 11540 | LC/MS pos |
| X- 11546 | LC/MS neg |
| X- 11550 | LC/MS neg |
| X- 11552 | LC/MS pos |
| X- 11568 | LC/MS pos |
| X- 11593 | LC/MS neg |
| X- 11786 | LC/MS pos |
| X- 11787 | LC/MS pos |
| X- 11792 | LC/MS pos |
| X- 11793 | LC/MS pos |
| X- 11795 | LC/MS pos |
| X- 11799 | LC/MS pos |

|          |           |
|----------|-----------|
| X- 11805 | LC/MS pos |
| X- 11809 | LC/MS pos |
| X- 11818 | LC/MS pos |
| X- 11820 | LC/MS pos |
| X- 11826 | LC/MS neg |
| X- 11843 | LC/MS neg |
| X- 11845 | LC/MS neg |
| X- 11847 | LC/MS neg |
| X- 11849 | LC/MS neg |
| X- 11850 | LC/MS neg |
| X- 11852 | LC/MS neg |
| X- 11858 | LC/MS neg |
| X- 11859 | LC/MS neg |
| X- 11876 | LC/MS neg |
| X- 11880 | LC/MS neg |
| X- 11905 | LC/MS neg |
| X- 12007 | LC/MS neg |
| X- 12013 | LC/MS neg |
| X- 12029 | LC/MS neg |
| X- 12038 | LC/MS neg |
| X- 12039 | LC/MS neg |
| X- 12040 | LC/MS neg |
| X- 12056 | LC/MS pos |
| X- 12063 | LC/MS neg |
| X- 12092 | LC/MS pos |

|          |           |
|----------|-----------|
| X- 12093 | LC/MS pos |
| X- 12094 | LC/MS pos |
| X- 12095 | LC/MS pos |
| X- 12100 | LC/MS pos |
| X- 12116 | LC/MS pos |
| X- 12188 | LC/MS neg |
| X- 12189 | LC/MS neg |
| X- 12206 | LC/MS neg |
| X- 12212 | LC/MS neg |
| X- 12216 | LC/MS neg |
| X- 12217 | LC/MS neg |
| X- 12230 | LC/MS neg |
| X- 12231 | LC/MS neg |
| X- 12236 | LC/MS neg |
| X- 12244 | LC/MS pos |
| X- 12253 | LC/MS neg |
| X- 12261 | LC/MS neg |
| X- 12263 | LC/MS neg |
| X- 12329 | LC/MS neg |
| X- 12405 | LC/MS neg |
| X- 12407 | LC/MS neg |
| X- 12428 | LC/MS neg |
| X- 12435 | LC/MS neg |
| X- 12441 | LC/MS neg |
| X- 12442 | LC/MS neg |

|          |           |
|----------|-----------|
| X- 12443 | LC/MS neg |
| X- 12450 | LC/MS neg |
| X- 12456 | LC/MS neg |
| X- 12465 | LC/MS pos |
| X- 12510 | LC/MS pos |
| X- 12524 | LC/MS neg |
| X- 12544 | LC/MS pos |
| X- 12556 | GC/MS     |
| X- 12627 | LC/MS neg |
| X- 12644 | LC/MS neg |
| X- 12645 | LC/MS neg |
| X- 12680 | LC/MS pos |
| X- 12696 | LC/MS neg |
| X- 12704 | LC/MS neg |
| X- 12711 | LC/MS neg |
| X- 12712 | LC/MS neg |
| X- 12717 | LC/MS neg |
| X- 12719 | LC/MS neg |
| X- 12726 | LC/MS neg |
| X- 12728 | LC/MS neg |
| X- 12729 | LC/MS neg |
| X- 12734 | LC/MS neg |
| X- 12740 | LC/MS neg |
| X- 12749 | LC/MS pos |
| X- 12771 | GC/MS     |

|          |           |
|----------|-----------|
| X- 12776 | LC/MS neg |
| X- 12786 | GC/MS     |
| X- 12798 | LC/MS pos |
| X- 12816 | LC/MS neg |
| X- 12830 | LC/MS neg |
| X- 12833 | LC/MS neg |
| X- 12844 | LC/MS neg |
| X- 12847 | LC/MS neg |
| X- 12850 | LC/MS neg |
| X- 12851 | LC/MS neg |
| X- 12855 | LC/MS pos |
| X- 12990 | LC/MS neg |
| X- 13069 | LC/MS neg |
| X- 13183 | LC/MS pos |
| X- 13215 | LC/MS neg |
| X- 13372 | LC/MS neg |
| X- 13429 | LC/MS neg |
| X- 13431 | LC/MS pos |
| X- 13435 | LC/MS pos |
| X- 13477 | LC/MS pos |
| X- 13496 | GC/MS     |
| X- 13548 | LC/MS pos |
| X- 13549 | LC/MS pos |
| X- 13553 | LC/MS neg |
| X- 13619 | GC/MS     |

|                                        |         |           |           |
|----------------------------------------|---------|-----------|-----------|
| X- 13640                               |         |           | LC/MS neg |
| X- 13658                               |         |           | LC/MS neg |
| X- 13671                               |         |           | LC/MS neg |
| X- 13699                               |         |           | LC/MS pos |
| X- 13741                               |         |           | LC/MS neg |
| X- 13859                               |         |           | LC/MS neg |
| X- 14056                               |         |           | LC/MS pos |
| X- 14057                               |         |           | LC/MS pos |
| X- 14086                               |         |           | LC/MS pos |
| X- 14189 (leucylalanine)               | Protein | Dipeptide | LC/MS pos |
| X- 14205 ( $\alpha$ -glutamyltyrosine) | Protein | Dipeptide | LC/MS pos |
| X- 14208 (phenylalanylserine)          | Protein | Dipeptide | LC/MS pos |
| X- 14304 (leucylalanine)               | Protein | Dipeptide | LC/MS neg |
| X- 14374                               |         |           | LC/MS pos |
| X- 14450 (phenylalanylleucin)          | Protein | Dipeptide | LC/MS pos |
| X- 14473                               |         |           | LC/MS pos |
| X- 14478                               |         |           | LC/MS pos |
| X- 14486                               |         |           | LC/MS pos |
| X- 14541                               |         |           | LC/MS neg |
| X- 14588                               |         |           | LC/MS neg |
| X- 14625                               |         |           | LC/MS neg |
| X- 14626                               |         |           | LC/MS neg |
| X- 14632                               |         |           | LC/MS neg |
| X- 14658                               |         |           | LC/MS neg |
| X- 14662                               |         |           | LC/MS neg |

X- 14663

LC/MS neg

X- 14745

GC/MS

X- 14977

LC/MS pos
