# Supplementary material for: The Pharmacogenetic Footprint of ACE Inhibition: A Population-Based Metabolomics Study
Source: PubMed Central journal article supplement (PMC4847917; doi:10.1371/journal.pone.0153163), 2016-04-27

## **The pharmacogenetic footprint of ACE inhibition: a population based metabolomics study**

Authors:

Elisabeth Altmaier, Cristina Menni, Margit Heier, Christa Meisinger, Barbara Thorand, Jan Quell,  
Michael Kobl, Werner Römisch-Margl, Ana M Valdes, Massimo Mangino, Melanie Waldenberger,  
Konstantin Strauch, Thomas Illig, Jerzy Adamski, Tim D. Spector, Christian Gieger, Karsten  
Suhre, Gabi Kastenmüller

Journal: PLOS One

Corresponding author:

Gabi Kastenmüller  
Helmholtz Zentrum München, German Research Center for Environmental Health,  
Ingolstädter Landstr. 1,  
D-85764 Neuherberg, Germany  
e-mail: [g.kastenmueller@helmholtz-muenchen.de](mailto:g.kastenmueller@helmholtz-muenchen.de)

**aspartylphenylalanine – rs4329**

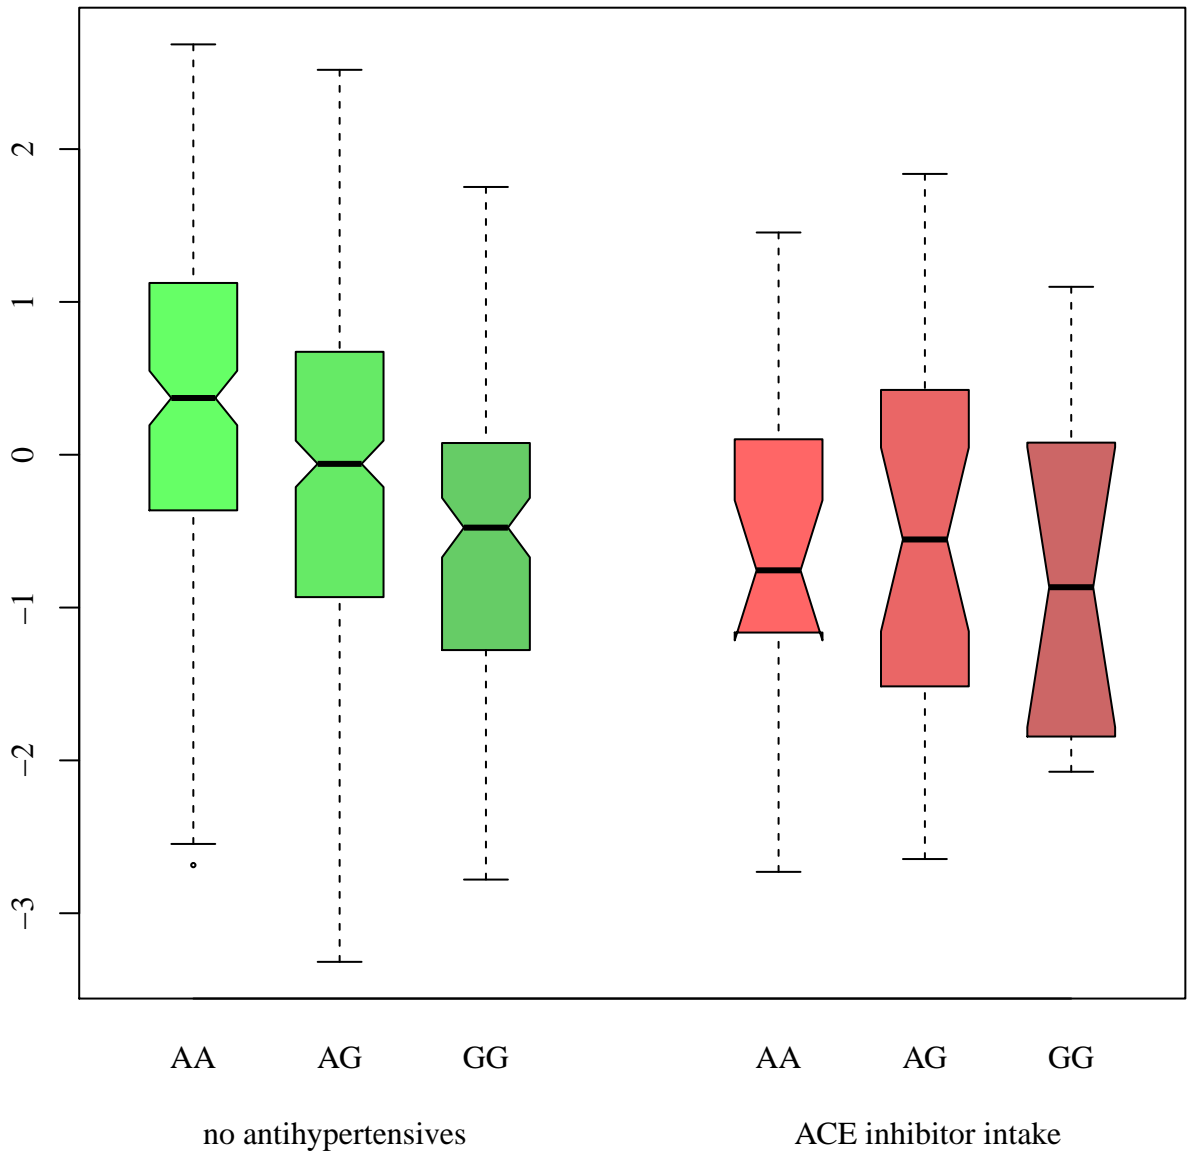

**X14086 – rs4329**

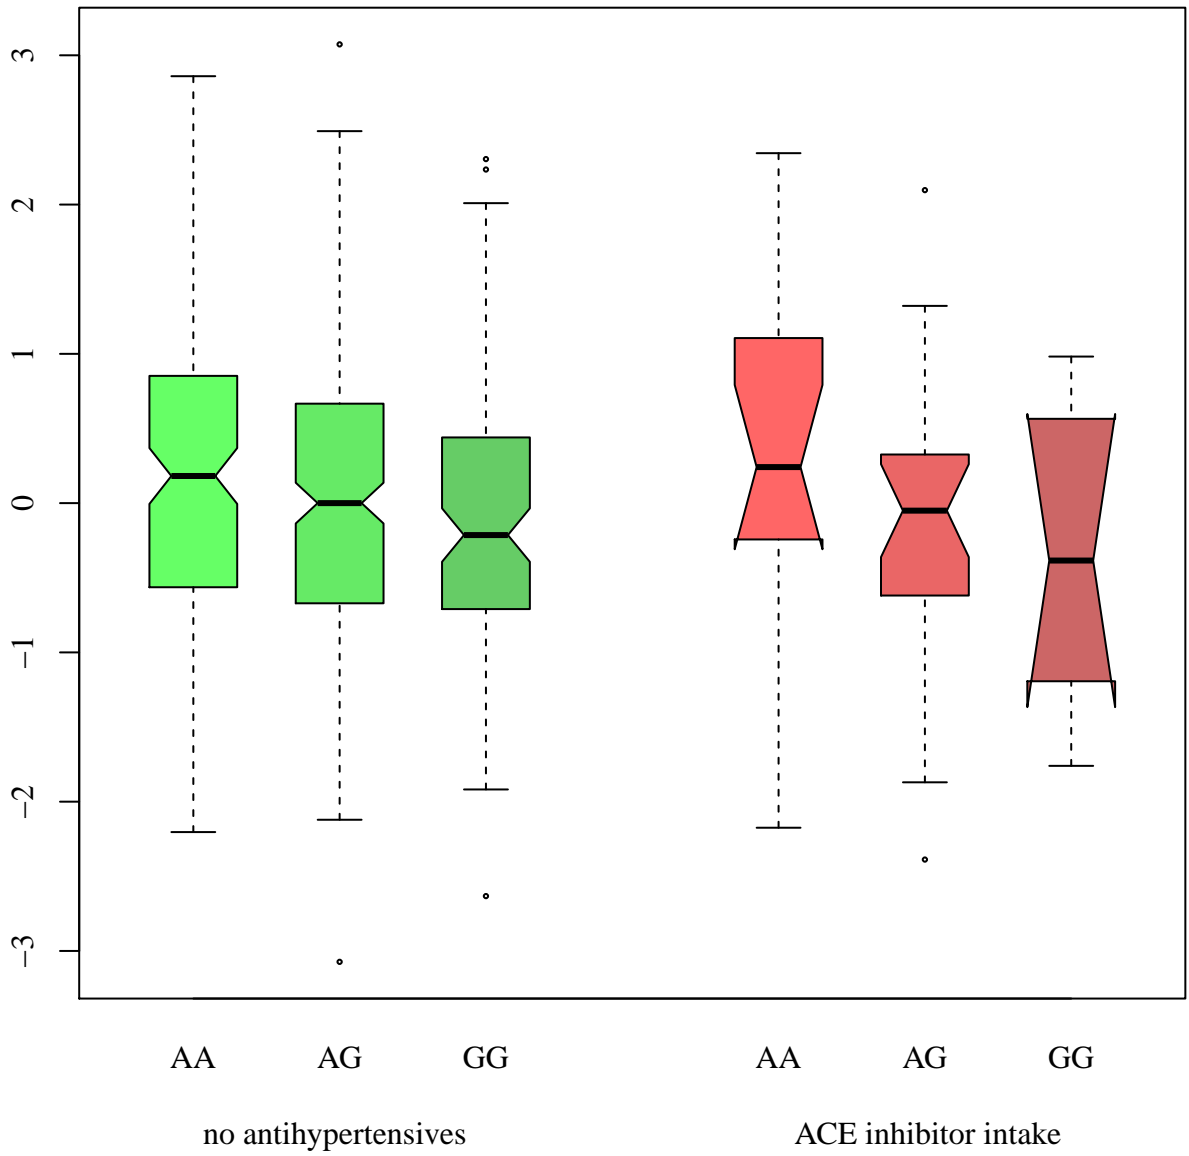

**X14189 – rs4329**

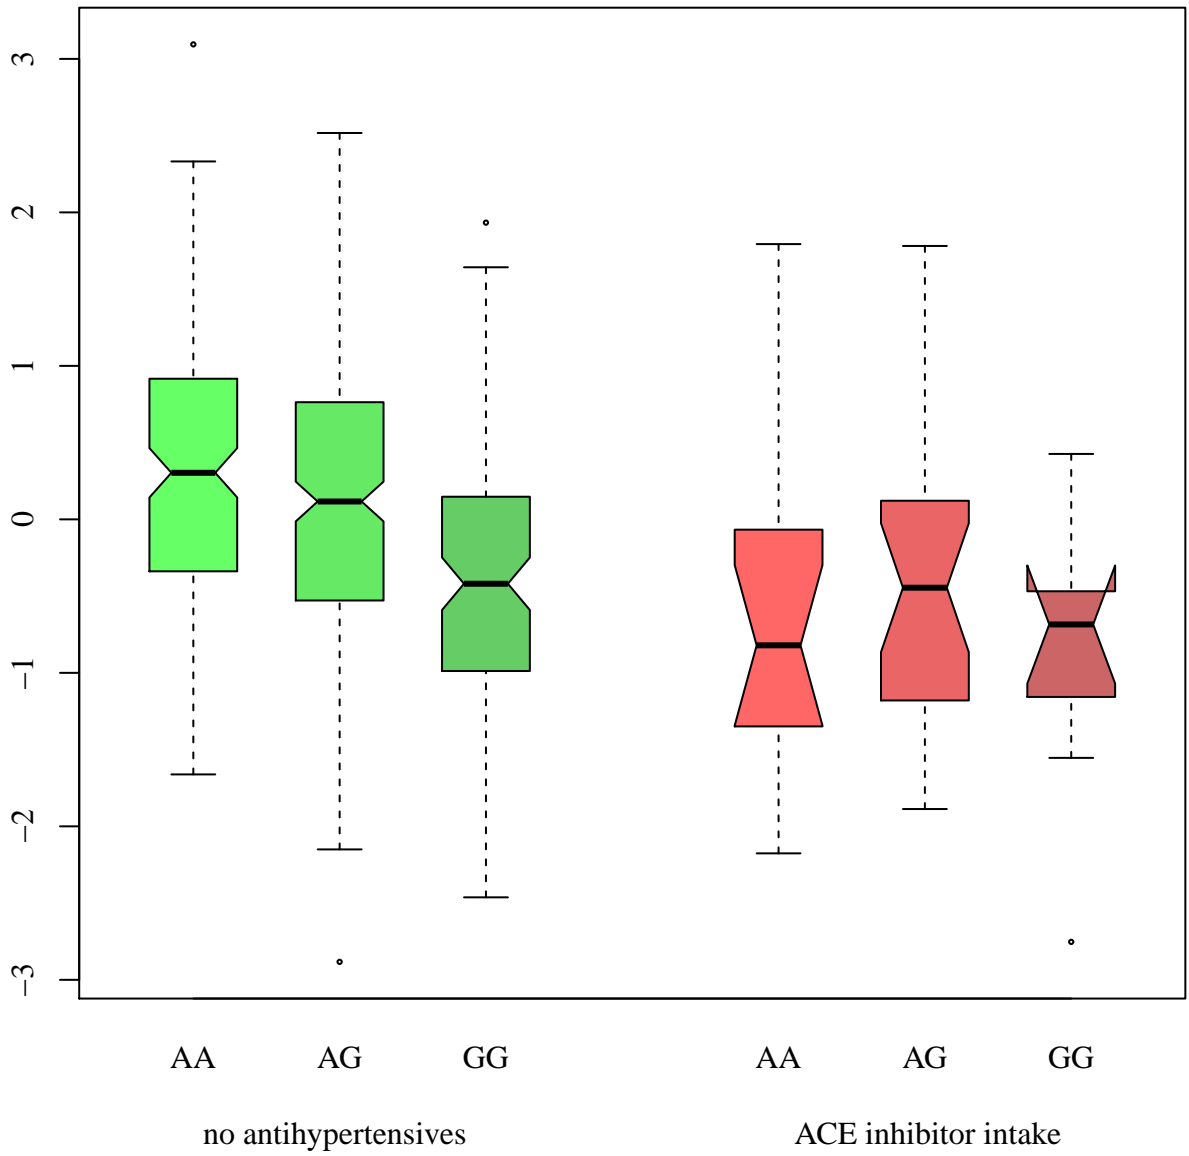

**X14205 – rs4329**

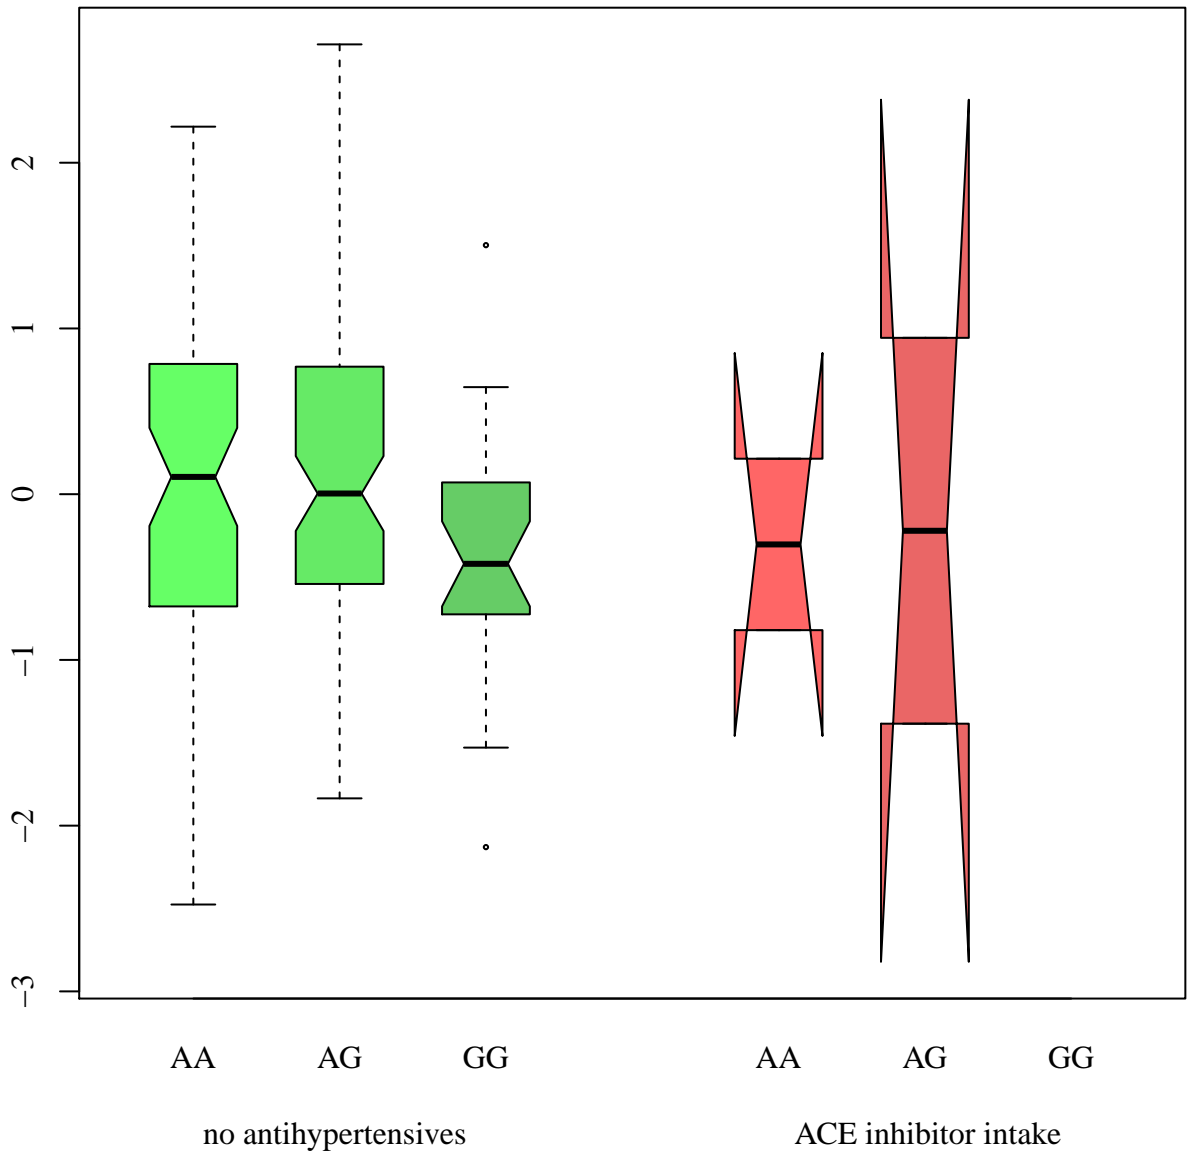

**X14208 – rs4329**

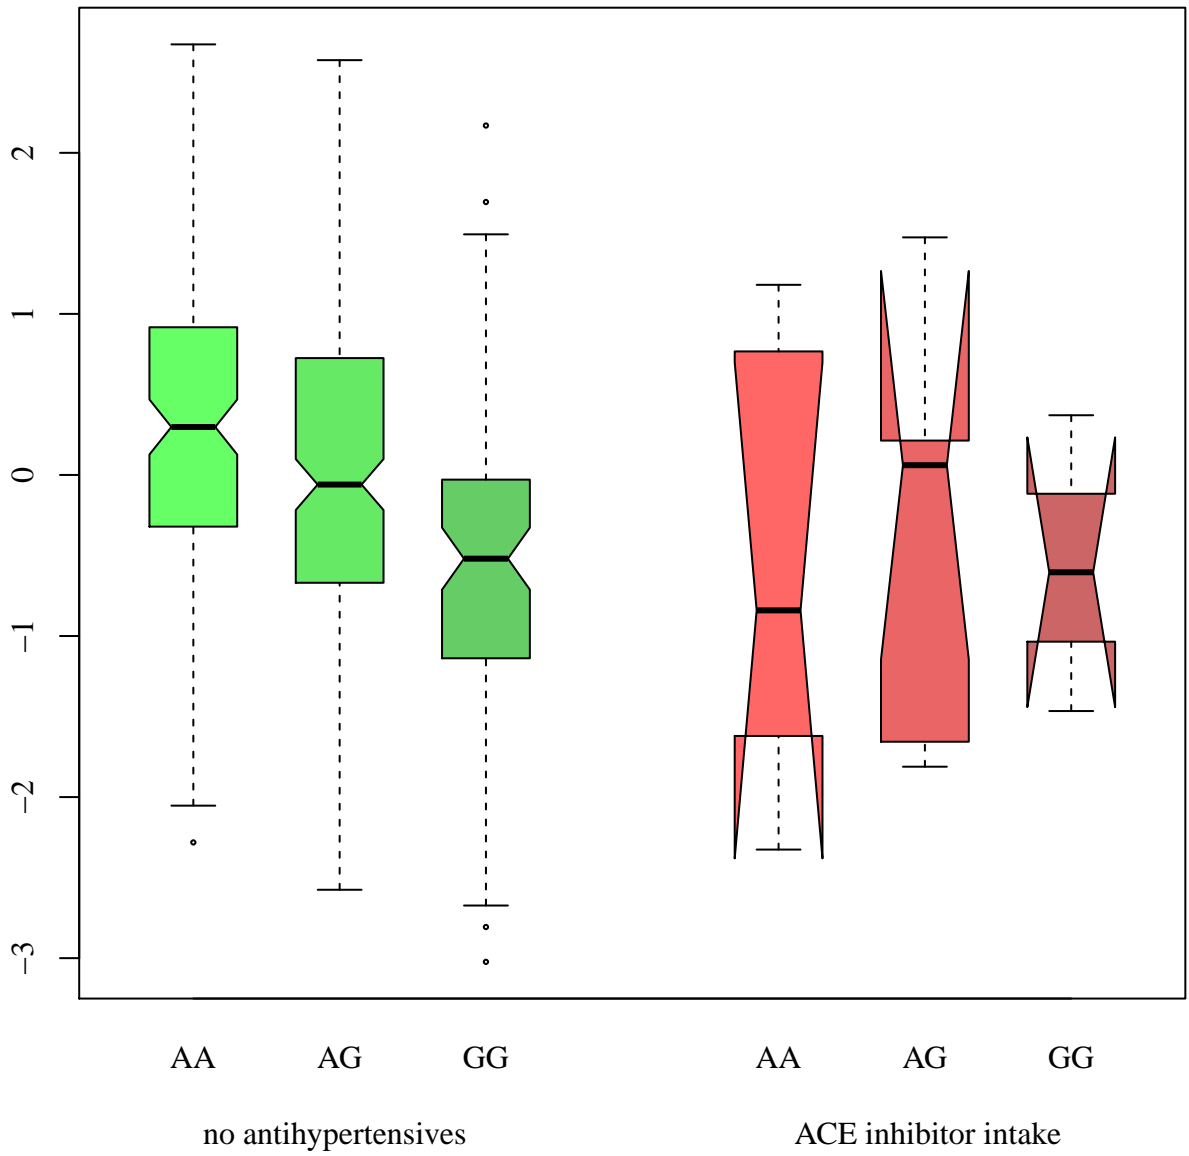

**X14304 – rs4329**

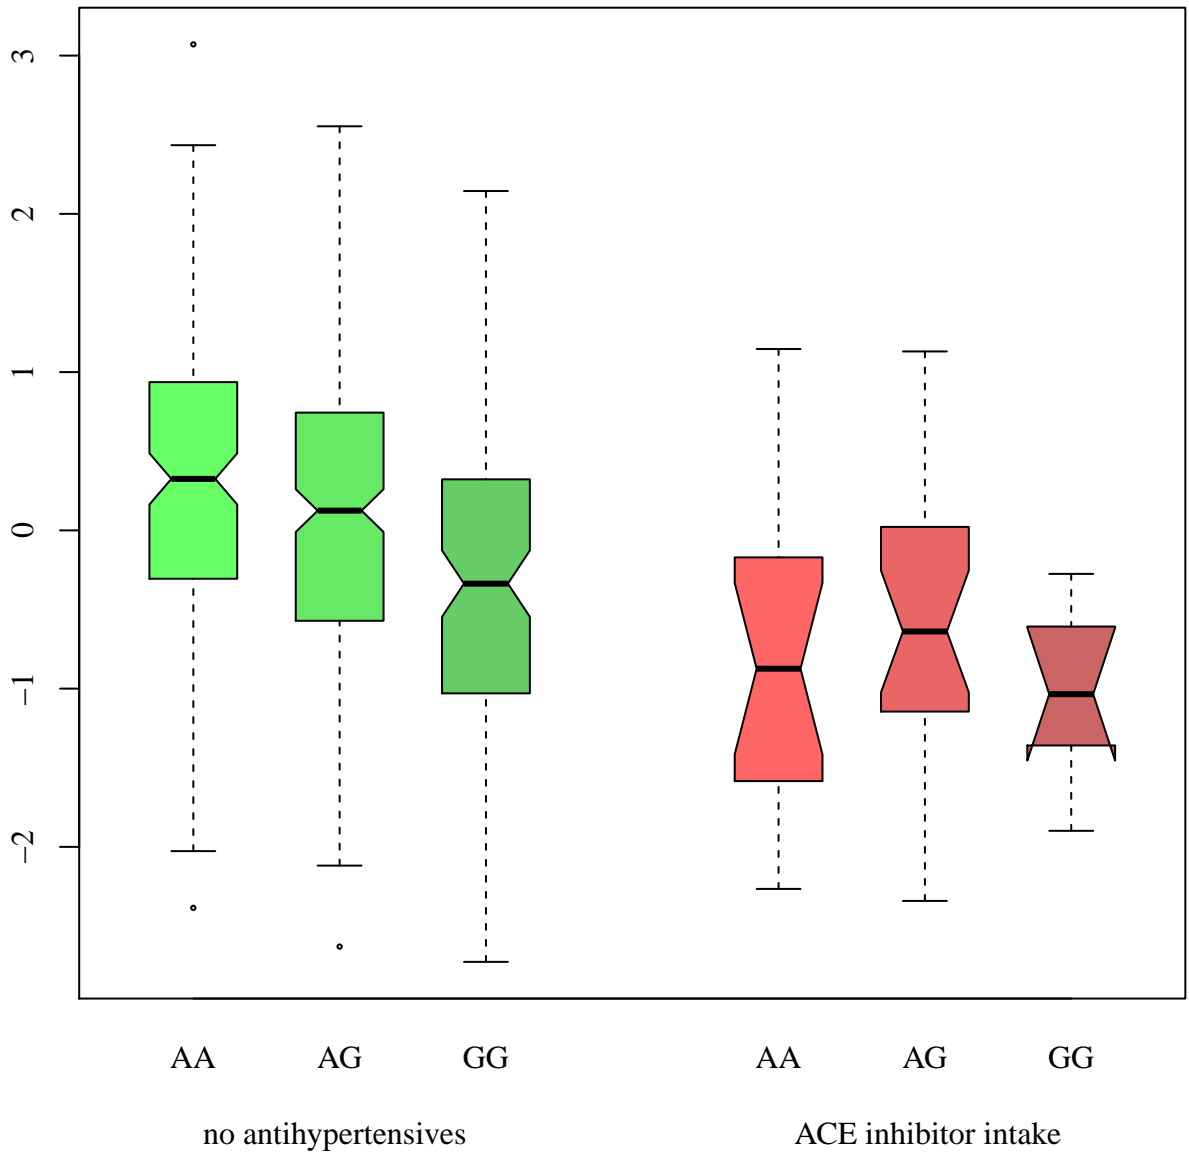

**aspartylphenylalanine/HWESASXX – rs4329**

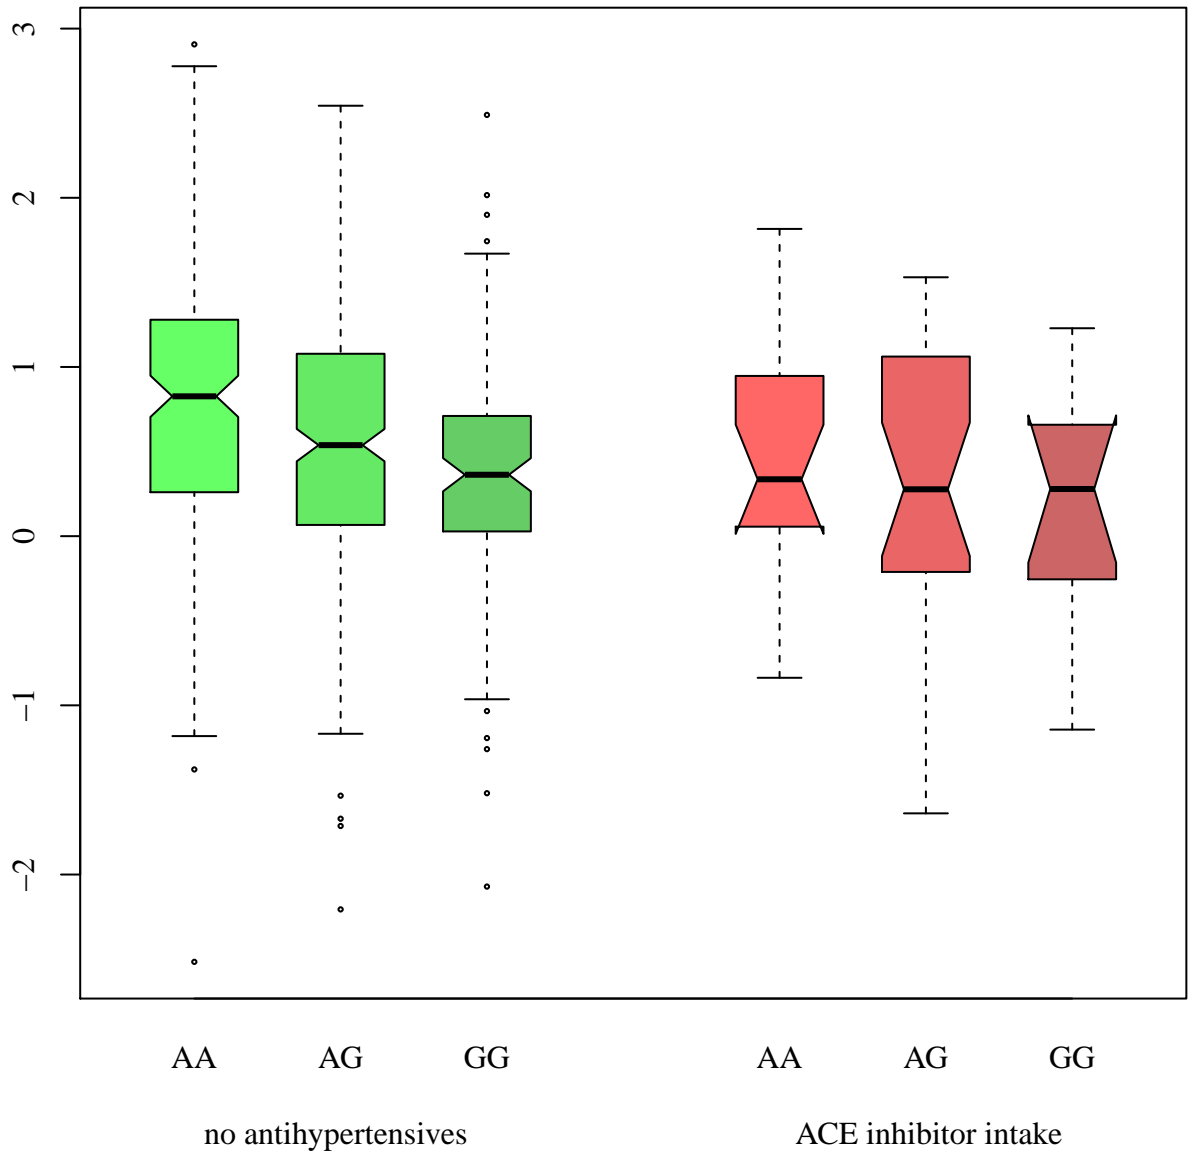

Supplement: pone.0153163.s006.pdf [file pone.0153163.s006.pdf]
