# Supplementary material for: The Pharmacogenetic Footprint of ACE Inhibition: A Population-Based Metabolomics Study
Source: PLoS One. 2016 Apr 27;11(4):e0153163. doi: 10.1371/journal.pone.0153163 (PMC4847917; doi:10.1371/journal.pone.0153163)
Supplement: S3 Table — (XLS) [file pone.0153163.s004.xls]

## Sheet: KORA F4
metabolic trait	cases (non-users - rs4316)	beta (non-users - rs4316)	p-value (non-users - rs4316)	p-gain (non-users - rs4316)	cases (ACE - rs4316)	p-value (ACE - rs4316)	beta 0	genotype 0 (rs4316)	beta 1	genotype 1 (rs4316)	beta 2	genotype 2 (rs4316)	cases (non-users - rs4320)	beta (non-users - rs4320)	p-value (non-users - rs4320)	p-gain (non-users - rs4320)	cases (ACE - rs4320)	p-value (ACE - rs4320)	beta 0	genotype 0 (rs4320)	beta 1	genotype 1 (rs4320)	beta 2	genotype 2 (rs4320)	cases (non-users - rs4323)	beta (non-users - rs4323)	p-value (non-users - rs4323)	p-gain (non-users - rs4323)	cases (ACE - rs4323)	p-value (ACE - rs4323)	beta 0	genotype 0 (rs4323)	beta 1	genotype 1 (rs4323)	beta 2	genotype 2 (rs4323)	cases (non-users - rs4324)	beta (non-users - rs4324)	p-value (non-users - rs4324)	p-gain (non-users - rs4324)	cases (ACE - rs4324)	p-value (ACE - rs4324)	beta 0	genotype 0 (rs4324)	beta 1	genotype 1 (rs4324)	beta 2	genotype 2 (rs4324)	cases (non-users - rs4325)
aspartylphenylalanine	1013	-0.310657	3.38423e-11	1	265	0.555759	-0.76217	1.60872e-15	-0.497759	1.8332e-09	-0.119057	0.237415	1013	-0.310441	3.47925e-11	1	265	0.553627	-0.76217	1.60872e-15	-0.497759	1.8332e-09	-0.119057	0.237415	1013	-0.311015	3.71145e-11	1	265	0.567247	-0.76217	1.60872e-15	-0.496827	1.91738e-09	-0.119982	0.234628	1013	-0.308084	4.89421e-11	1	265	0.554512	-0.76217	1.60872e-15	-0.496827	1.91738e-09	-0.119982	0.234628	1013
aspartylphenylalanine/HWESASXX	981	-0.360274	3.10061e-14	1091.47	261	0.248929	-0.999567	1.84193e-25	-0.703135	3.05991e-17	-0.250762	0.0140595	981	-0.360174	3.13533e-14	1109.69	261	0.247892	-0.999567	1.84193e-25	-0.703135	3.05991e-17	-0.250762	0.0140595	981	-0.360762	3.47019e-14	1069.52	261	0.240334	-0.999567	1.84193e-25	-0.701982	3.28918e-17	-0.252072	0.0137414	981	-0.357725	4.69878e-14	1041.59	261	0.24657	-0.999567	1.84193e-25	-0.701982	3.28918e-17	-0.252072	0.0137414	981
aspartylphenylalanine/X11805	1009	-0.499703	2.70123e-27	1.25285e+16	259	0.0164383	-1.49091	7.24773e-52	-1.04922	5.77303e-42	-0.641201	2.13296e-11	1009	-0.499726	2.654e-27	1.31095e+16	259	0.0162101	-1.49091	7.24773e-52	-1.04922	5.77303e-42	-0.641201	2.13296e-11	1009	-0.50493	1.08333e-27	3.42596e+16	259	0.0191208	-1.49091	7.24773e-52	-1.0499	4.57097e-42	-0.637837	2.80793e-11	1009	-0.50341	1.0333e-27	4.73651e+16	259	0.0186168	-1.49091	7.24773e-52	-1.0499	4.57097e-42	-0.637837	2.80793e-11	1009
aspartylphenylalanine/phenylalanylleucin (X14450)	872	-0.41182	2.29011e-16	147776	222	0.200778	-1.19758	2.40243e-31	-0.833856	7.42152e-22	-0.430626	2.50348e-05	872	-0.411757	2.28122e-16	152517	222	0.198342	-1.19758	2.40243e-31	-0.833856	7.42152e-22	-0.430626	2.50348e-05	872	-0.409797	3.98722e-16	93083.7	222	0.214401	-1.19758	2.40243e-31	-0.830207	1.27771e-21	-0.437718	1.80664e-05	872	-0.408133	4.28103e-16	114323	222	0.196367	-1.19758	2.40243e-31	-0.830207	1.27771e-21	-0.437718	1.80664e-05	872
X14086	1024	-0.348388	6.13308e-14	1	259	0.745608	-1.07422	2.2597e-28	-0.826897	2.44328e-24	-0.498358	9.24557e-07	1024	-0.348184	6.31234e-14	1	259	0.744492	-1.07422	2.2597e-28	-0.826897	2.44328e-24	-0.498358	9.24557e-07	1024	-0.353366	3.17012e-14	1	259	0.778051	-1.07422	2.2597e-28	-0.828041	2.03051e-24	-0.49392	1.16185e-06	1024	-0.349456	5.05225e-14	1	259	0.766082	-1.07422	2.2597e-28	-0.828041	2.03051e-24	-0.49392	1.16185e-06	1024
leucylalanine (X14189, pos. mode)	1022	-0.435732	2.2876e-21	1	254	0.986618	-1.25095	1.28864e-38	-1.00986	2.32569e-37	-0.472742	2.43055e-07	1022	-0.435539	2.36576e-21	1	254	0.991486	-1.25095	1.28864e-38	-1.00986	2.32569e-37	-0.472742	2.43055e-07	1022	-0.438172	1.822e-21	1	254	0.988886	-1.25095	1.28864e-38	-1.01161	1.80177e-37	-0.466383	3.34764e-07	1022	-0.436107	2.07464e-21	1	254	0.986491	-1.25095	1.28864e-38	-1.01161	1.80177e-37	-0.466383	3.34764e-07	1022
a-glutamyltyrosine (X14205)	934	-0.338189	2.45348e-12	1	138	0.0236453	-1.33681	1.25868e-29	-1.10638	2.15709e-27	-0.76852	1.54362e-10	934	-0.338294	2.40607e-12	1	138	0.0236043	-1.33681	1.25868e-29	-1.10638	2.15709e-27	-0.76852	1.54362e-10	934	-0.335996	4.08802e-12	1	138	0.021602	-1.33681	1.25868e-29	-1.10463	2.51445e-27	-0.771304	1.42602e-10	934	-0.336672	3.07681e-12	1	138	0.0234853	-1.33681	1.25868e-29	-1.10463	2.51445e-27	-0.771304	1.42602e-10	934
phenylalanylserine (X14208)	1025	-0.372599	6.38166e-16	1	179	0.948726	-1.5071	2.03093e-41	-1.27024	7.77003e-44	-0.900441	1.10419e-15	1025	-0.37258	6.36355e-16	1	179	0.949071	-1.5071	2.03093e-41	-1.27024	7.77003e-44	-0.900441	1.10419e-15	1025	-0.37549	4.65411e-16	1	179	0.928212	-1.5071	2.03093e-41	-1.26928	7.91266e-44	-0.901216	1.18016e-15	1025	-0.372641	6.24352e-16	1	179	0.948518	-1.5071	2.03093e-41	-1.26928	7.91266e-44	-0.901216	1.18016e-15	1025
leucylalanine (X14304, neg. mode)	916	-0.396946	2.17139e-15	1	169	0.746438	-1.25261	1.88489e-30	-0.89728	2.2557e-22	-0.538451	1.62792e-06	916	-0.396661	2.26754e-15	1	169	0.73906	-1.25261	1.88489e-30	-0.89728	2.2557e-22	-0.538451	1.62792e-06	916	-0.400911	1.40334e-15	1	169	0.712302	-1.25261	1.88489e-30	-0.89884	1.89176e-22	-0.531837	2.14389e-06	916	-0.398207	1.79591e-15	1	169	0.722973	-1.25261	1.88489e-30	-0.89884	1.89176e-22	-0.531837	2.14389e-06	916
genotype 0: p-value for the major homozygotes
genotype 1: p-value for the heterozygotes
genotype 2: p-value for the minor homozygotes
ACE: ACE inhibitor users
[truncated: 206 more columns]
